# Supplementary material for: Atom-economical selenation of electron-rich arenes and phosphonates with molecular oxygen at room temperature
Source: Royal Society of Chemistry journal article supplement (doi:10.1039/c8ob02792g), 2018-01-01

## Supplementary Information

### **Atom-economical selenation of electron-rich arenes and phosphonates with molecular oxygen at room temperature**

Samir Kumar Bhunia<sup>ab</sup>, Pritha Das<sup>a</sup> and Ranjan Jana<sup>\*ab</sup>

<sup>a</sup>Organic and Medicinal Chemistry Division, CSIR-Indian Institute of Chemical Biology

4 Raja S. C. Mullick Road, Jadavpur, Kolkata-700032, West Bengal, India

<sup>b</sup>Academy of Scientific and Innovative Research, Kolkata-700032, West Bengal, India

E-mail: [rjana@iicb.res.in](mailto:rjana@iicb.res.in)

## Table of Contents

|                                                                         |         |
|-------------------------------------------------------------------------|---------|
| General Information.....                                                | S3      |
| General procedure for the C-Se bond formation.....                      | S3-S4   |
| General procedure for the Se-P bond formation.....                      | S5      |
| Characterization Data for seleno-carbon product .....                   | S4-S11  |
| Characterization Data for seleno-phosphorous product .....              | S12-S22 |
| References.....                                                         | S23     |
| $^1\text{H}$ , $^{13}\text{C}$ NMR and $^{31}\text{P}$ NMR Spectra..... | S24-S88 |

## **General Information**

All manipulations with air-sensitive reagents were carried out under a dry nitrogen atmosphere. Unless otherwise stated, all commercial reagents were used without additional purification. Solvents were dried using standard methods and distilled before use. TLC was performed on silica gel plates (Merck silica gel 60,  $f_{254}$ ), and the spots were visualized with UV light (254 and 365 nm) or by charring the plate dipped in  $\text{KMnO}_4$  or vanillin charring solution.  $^1\text{H}$  NMR was recorded at 300 MHz (Bruker-DPX), 400 MHz (JEOL-JNM-ECZ400S/L1) and 600 MHz (Bruker-Avance) frequency and  $^{13}\text{C}$  NMR spectra were recorded at 75 MHz (Bruker-DPX) 100 MHz (JEOL-JNM-ECZ400S/L1) and 150 MHz (Bruker-Avance) frequency in  $\text{CDCl}_3$  solvent using TMS as the internal standard. Chemical shifts were measured in parts per million (ppm) referenced to 0.0 ppm for tetramethylsilane. The following abbreviations were used to explain multiplicities: s = singlet, d = doublet, t = triplet, q = quartet, quin = quintet, sex = sextet, m = multiplet, br. = broad. Coupling constants,  $J$  were reported in Hertz unit (Hz). HRMS ( $m/z$ ) were measured using EI and ESI techniques (JEOL-JMS 700 and Q-Tof Micro mass spectrometer respectively).

## **General Procedure for the C-Se Bond Formation**

### **Method-A :**

A mixture of arene (1 equiv) and benzeneselenol (1.2 equiv) with DMF as a solvent was taken in a vessel under air. This reaction mixture was allowed to stir for 15 minutes to 6 h at room temperature in open air. After completion (detected by TLC), the reaction mixture was extracted with ethyl acetate and cold water. The organic layer was dried over anhydrous  $\text{Na}_2\text{SO}_4$  and the solvent was evaporated under reduced pressure. The crude product was purified by column chromatography using ethyl acetate/hexane (5:95 to 15:85) as eluent to afford the desired product.

### **Method-B :**

A mixture of arene (1 equiv) and diaryldiselenide or diarylditellane (0.6 equiv) with DMF as a solvent was taken in a vessel under air. This reaction mixture was allowed to stir for 15 minutes to 6 h at room temperature in open air. After completion (detected by TLC), the reaction mixture was extracted with ethyl acetate and cold water. The organic layer was dried over anhydrous  $\text{Na}_2\text{SO}_4$  and the solvent was evaporated under reduced pressure. The crude product was purified by column chromatography using ethyl acetate/hexane (5:95 to 15:85) as eluent to afford the desired product.

## **General Procedure for the Se-P Bond Formation**

### **Method-C :**

A mixture of dialkyl phosphonate or diaryl phosphonate (1 equiv) and diaryldiselenide or dialkyldiselenide (0.6 equiv) with DMF as a solvent was taken in a vessel under O<sub>2</sub> atmosphere. This reaction mixture was allowed to stir for 36 h at room temperature in presence of O<sub>2</sub> balloon. After completion (detected by TLC), the reaction mixture was extracted with ethyl acetate and cold water. The organic layer was dried over anhydrous Na<sub>2</sub>SO<sub>4</sub> and the solvent was evaporated under reduced pressure. The crude product was purified by column chromatography using ethyl acetate/hexane (10:90 to 20:80) as eluent to afford the desired product.

### **Method-D :**

A mixture of benzene selenol (1.0 equiv) and dialkyl phosphonate or diaryl phosphonate (1.2 equiv) with DMF as a solvent was taken in a vessel under O<sub>2</sub> atmosphere. This reaction mixture was allowed to stir for 36 h at room temperature in presence of O<sub>2</sub> balloon. After completion (detected by TLC), the reaction mixture was extracted with ethyl acetate and cold water. The organic layer was dried over anhydrous Na<sub>2</sub>SO<sub>4</sub> and the solvent was evaporated under reduced pressure. The crude product was purified by column chromatography using ethyl acetate/hexane (10:90 to 20:80) as eluent to afford the desired product.

## **Characterization Data for Seleno-Carbon Product:**

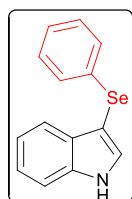

### **3-(Phenylselenanyl)-1H-indole, 4a<sup>[1]</sup>:**

The reaction is conducted for 15 minutes by using indole (0.2 mmol, 23.4 mg) with benzeneselenol (1.2 equiv, 37.9 mg) or diphenyl diselenide (0.6 equiv, 37.4 mg) and afforded the desired product as a white solid, 54.6 mg (100% by Method-A) and 50.2 mg (92% by Method-B).

$^1\text{H}$  NMR (400 MHz,  $\text{D}_6\text{-DMSO}$ ):  $\delta$  11.68 (s, 1H), 7.73-7.72 (m, 1H), 7.49 (d,  $J = 8.0$  Hz, 1H), 7.40 (d,  $J = 8.0$  Hz, 1H), 7.18-7.04 (m, 7H);  $^{13}\text{C}$  NMR (100 MHz,  $\text{D}_6\text{-DMSO}$ ):  $\delta$  136.6, 133.7, 132.7, 129.5, 129.0, 128.1, 125.6, 121.98, 120.0, 118.98, 112.1, 95.0.

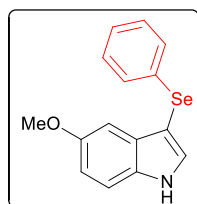

### 5-Methoxy-3-(phenylselanyl)-1H-indole, 4b<sup>[1]</sup>:

The reaction is conducted for 30 minutes by using 5-methoxyindole (0.2mmol, 29.2 mg) with benzeneselenol (1.2 equiv, 37.9 mg) or diphenyl diselenide (0.6 equiv, 37.4 mg) and afforded the desired product as a white solid, 60.6 mg (100% by Method-A) and 57.6 mg (95% by Method-B).

$^1\text{H}$  NMR (400 MHz,  $\text{D}_6\text{-DMSO}$ ):  $\delta$  8.35 (br. s, 1H), 7.42 (d,  $J = 2.4$  Hz, 1H), 7.31 (d,  $J = 8.8$  Hz, 1H), 7.25-7.22 (m, 2H), 7.15-7.07 (m, 4H), 6.92 (dd,  $J = 8.8$  Hz, 2.4 Hz, 1H), 3.80 (s, 3H);  $^{13}\text{C}$  NMR (100 MHz,  $\text{D}_6\text{-DMSO}$ ):  $\delta$  156.2, 134.0, 132.0, 131.3, 130.8, 129.1, 128.5, 125.6, 113.6, 112.4, 101.5, 97.6, 55.9.

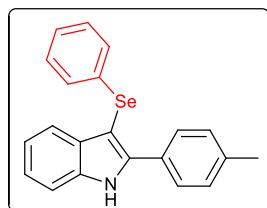

### 3-(Phenylselanyl)-2-(p-tolyl)-1H-indole, 4c<sup>[2]</sup>:

The reaction is conducted for 2 hours by using 2-(p-tolyl)-1H-indole (0.2 mmol, 41.2 mg) with benzeneselenol (1.2 equiv, 37.9 mg) or diphenyl diselenide (0.6 equiv, 37.4 mg) and afforded the desired product as a white solid, 72.6 mg (100% by Method-A) and 71.1mg (98% by Method-B).

$^1\text{H}$  NMR (400 MHz,  $\text{CDCl}_3$ ):  $\delta$  8.52 (br. s, 1H), 7.69-7.65 (m, 1H), 7.62 (d,  $J = 8.0$  Hz, 2H), 7.43 (d,  $J = 8.0$  Hz, 1H), 7.29-7.17 (m, 6H), 7.16-7.08 (m, 3H), 2.40 (s, 3H);  $^{13}\text{C}$  NMR (100 MHz,  $\text{CDCl}_3$ ):  $\delta$  142.5, 138.8, 136.2, 134.3, 132.2, 129.5, 129.23, 129.17, 128.5, 128.3, 125.5, 123.2, 121.2, 120.9, 111.1, 95.4, 21.5.

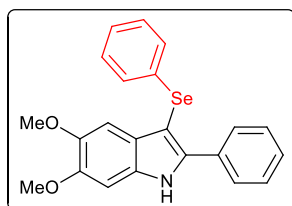

### 5,6-Dimethoxy-2-phenyl-3-(phenylselanyl)-1H-indole, 4d:

The reaction is conducted for 2 hours by using 5,6-dimethoxy-2-phenyl-1H-indole (0.2mmol, 50.4 mg) with benzeneselenol (1.2 equiv, 37.9 mg) or diphenyl diselenide (0.6 equiv, 37.4 mg) and afforded the desired product as a white solid, 81.8 mg (100% by Method-A) and 73.6mg (90% by Method-B).

$^1\text{H}$  NMR (300 MHz,  $\text{D}_6\text{-DMSO}$ ):  $\delta$  11.80 (br. s, 1H), 7.77 (d,  $J = 7.8$  Hz, 2H), 7.44 (t,  $J = 7.5$  Hz, 2H), 7.34 (t,  $J = 7.2$  Hz, 1H), 7.20-7.08 (m, 5H), 7.01 (s, 1H), 6.89 (s, 1H), 3.83 (s, 3H), 3.69 (s, 3H);  $^{13}\text{C}$  NMR (75 MHz,  $\text{D}_6\text{-DMSO}$ ):  $\delta$  147.6, 145.7, 140.2, 133.9, 132.2, 130.7, 129.3, 128.4, 128.1, 127.8, 127.6, 125.5, 124.5, 101.4, 95.3, 92.8, 55.8; HRMS (ESI,  $m/z$ ) calcd. for  $\text{C}_{22}\text{H}_{19}\text{NNaO}_2\text{Se}$  [ $\text{M} + \text{Na}$ ] $^+$ : 432.0479; found: 432.0485;  $^{77}\text{Se}$  NMR (76.3 MHz,  $\text{CDCl}_3$ ): 463.9.

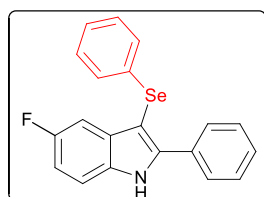

#### 5-Fluoro-2-phenyl-3-(phenylselanyl)-1H-indole, 4e<sup>[5]</sup>:

The reaction is conducted for 2 hours by using 5-fluoro-2-phenyl-1H-indole (26.8 mg, 0.2mmol) with benzeneselenol (1.2 equiv, 37.9 mg) or diphenyl diselenide (0.6 equiv, 37.4 mg) and afforded the desired product as a white solid, 58.0 mg (100% by Method-A) and 49.3 mg (85% by Method-B).

$^1\text{H}$  NMR (400 MHz,  $\text{D}_6\text{-DMSO}$ ):  $\delta$  8.58 (br. s, 1H), 7.74-7.71 (m, 2H), 7.47-7.36 (m, 4H), 7.31 (dd,  $J = 9.2$  Hz, 2.4 Hz, 1H), 7.21-7.09 (m, 5H), 7.00 (td,  $J = 9.2$  Hz, 2.4 Hz, 1H);  $^{13}\text{C}$  NMR (100 MHz,  $\text{D}_6\text{-DMSO}$ ):  $\delta$  160.0, 157.7, 143.9, 133.7, 133.2, 133.1, 132.6, 131.8, 129.2, 12.97, 128.8, 128.6, 128.4, 125.7.

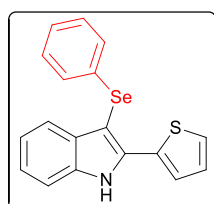

#### 3-(Phenylselanyl)-2-(thiophen-2-yl)-1H-indole, 4f:

The reaction is conducted for 2 hours by using 2-(thiophen-2-yl)-1H-indole (39.6 mg, 0.2mmol) with benzeneselenol (1.2 equiv, 37.9 mg) and afforded the desired product as a white solid, 70.8 mg (100% by Method-A).

$^1\text{H}$  NMR (400 MHz,  $\text{D}_6\text{-DMSO}$ ):  $\delta$  12.13 (br. s, 1H), 7.77 (dd,  $J = 3.6$  Hz, 1.2 Hz, 1H), 7.61 (dd,  $J = 5.2$  Hz, 1.2 Hz, 1H), 7.49 (t,  $J = 7.6$  Hz, 2H), 7.24-7.08 (m, 8H);  $^{13}\text{C}$  NMR (100 MHz,  $\text{D}_6\text{-DMSO}$ ):  $\delta$  136.8, 136.4, 133.2, 133.1, 131.5, 129.2, 127.94, 127.88, 127.1, 126.4, 125.7, 122.9, 120.5, 119.3, 111.5, 93.6; HRMS (ESI,  $m/z$ ) calcd. for  $\text{C}_{18}\text{H}_{13}\text{NNaSSe}$  [ $\text{M} + \text{Na}$ ] $^+$ : 377.9832; found: 377.9805;  $^{77}\text{Se}$  NMR (76.3 MHz,  $\text{CDCl}_3$ ): 206.7.

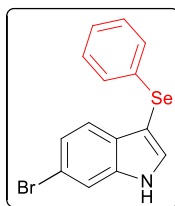

**6-Bromo-3-(phenylselanyl)-1H-indole, 4g<sup>[4]</sup>:**

The reaction is conducted for 4 hours by using 6-bromoindole (2mmol, 38.6 mg) with benzeneselenol (1.2 equiv, 37.9 mg) or diphenyl diselenide (0.6 equiv, 37.4 mg) and afforded the desired product as a white solid, 63.0 mg (90% by Method-A) 60.9 mg (87% by Method-B).

<sup>1</sup>H NMR (400 MHz, D<sub>6</sub>-DMSO): δ 11.78 (br. s, 1H), 7.73 (s, 1H), 7.69 (d, *J* = 1.6 Hz, 1H), 7.32 (d, *J* = 8.4 Hz, 1H), 7.17 (dd, *J* = 8.8 Hz, 1.6 Hz, 1H), 7.14-7.07 (m, 5H); <sup>13</sup>C NMR (100 MHz, D<sub>6</sub>-DMSO): δ 137.7, 133.9, 133.4, 129.3, 128.8, 128.4, 126.0, 123.2, 121.0, 115.1, 114.9, 95.8.

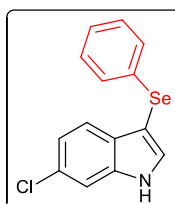

**6-Chloro-3-(phenylselanyl)-1H-indole, 4h<sup>[4]</sup>:**

The reaction is conducted by 5 hours using 6-chloroindole(0.2 mmol, 30.0 mg) with benzeneselenol (1.2 equiv, 37.9 mg) and afforded the desired product as a white solid, 56.3 mg (92% by method-A).

<sup>1</sup>H NMR (300 MHz, D<sub>6</sub>-DMSO): δ 11.82 (br. s, 1H), 7.79 (d, *J* = 2.1 Hz, 1H), 7.56 (d, *J* = 2.1 Hz, 1H), 7.39 (d, *J* = 8.4 Hz, 1H), 7.19-7.06 (m, 6H); <sup>13</sup>C NMR (75 MHz, D<sub>6</sub>-DMSO): δ 137.0, 133.99, 133.4, 129.2, 128.4, 128.3, 128.2, 126.9, 125.8, 120.5, 111.8, 95.5.

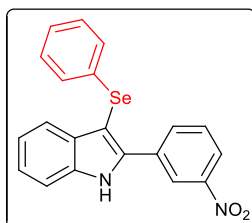

**2-(3-Nitrophenyl)-3-(phenylselanyl)-1H-indole, 4i:**

The reaction is conducted by 4 hours using 2-(3-nitrophenyl)-3-(phenylselanyl)-1H-indole (44.8 mg, 0.2mmol) with diphenyl diselenide (0.6 equiv, 37.4 mg) and afforded the desired product as a white solid, 70.9 mg (90% by method-B).

$^1\text{H}$  NMR (400 MHz,  $\text{D}_6$ -DMSO):  $\delta$  12.33 (s, 1H), 8.67 (s, 1H), 8.24 (dd,  $J$  = 8.0 Hz, 1.2 Hz, 1H), 8.19 (dt,  $J$  = 1.2 Hz, 0.8 Hz, 1H), 7.73 (t,  $J$  = 8.4 Hz, 1H), 7.49 (d,  $J$  = 8.0 Hz, 1H), 7.45 (d,  $J$  = 8.0 Hz, 1H), 7.21 (t,  $J$  = 6.8 Hz, 1H), 7.14-7.04 (m, 6H);  $^{13}\text{C}$  NMR (100 MHz,  $\text{D}_6$ -DMSO):  $\delta$  148.3, 139.7, 137.2, 135.2, 133.6, 131.7, 130.6, 129.9, 128.4, 126.4, 123.9, 123.41, 123.38, 121.3, 120.5, 112.7, 95.6; HRMS (ESI,  $m/z$ ) calcd. for  $\text{C}_{20}\text{H}_{14}\text{N}_2\text{NaO}_2\text{Se}$  [ $\text{M} + \text{Na}$ ] $^+$ : 417.0118; found: 417.0111.

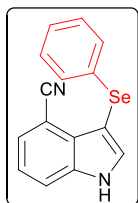

### 3-(Phenylselanyl)-1*H*-indole-4-carbonitrile, 4j<sup>[1]</sup>:

The reaction is conducted for 2 hours by using 4-cyanoindole (28.2 mg, 0.2 mmol) with benzeneselenol (1.2 equiv, 37.9 mg) and afforded the desired product as a white solid, 23.8 mg (40% by Method-A).

$^1\text{H}$  NMR (400 MHz,  $\text{D}_6$ -DMSO):  $\delta$  12.27 (br. s, 1H), 7.98 (s, 1H), 7.83 (d,  $J$  = 8.4 Hz, 1H), 7.55 (d,  $J$  = 7.6 Hz, 1H), 7.30 (t,  $J$  = 8.0 Hz, 1H), 7.18-7.10 (m, 5H);  $^{13}\text{C}$  NMR (100 MHz,  $\text{D}_6$ -DMSO):  $\delta$  137.0, 136.9, 134.2, 129.1, 128.5, 127.9, 127.5, 125.8, 121.9, 117.7, 117.5, 101.6, 94.4.

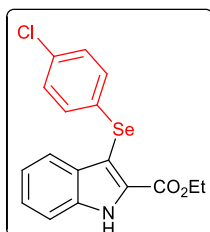

### Ethyl 3-((4-chlorophenyl)selanyl)-1*H*-indole-2-carboxylate, 4k:

The reaction is conducted for 4 hours by using ethyl 1*H*-indole-2-carboxylate (37.6 mg, 0.2 mmol) with bis(4-chlorophenyl) diselenide (45.7 mg, 0.6 equiv.) and afforded the desired product as a white solid, 64.2 mg (85% by Method-B).

$^1\text{H}$  NMR (400 MHz,  $\text{CDCl}_3$ ):  $\delta$  9.35 (br. s, 1H), 7.50 (dd,  $J$  = 8.0 Hz, 0.8 Hz, 1H), 7.44 (d,  $J$  = 8.4 Hz, 1H), 7.34 (td,  $J$  = 7.2 Hz, 1.2 Hz, 1H), 7.26-7.23 (m, 2H), 7.15-7.10 (m, 3H), 4.41 (quin,  $J$  = 7.2 Hz, 2H), 1.36 (t,  $J$  = 7.2 Hz, 3H);  $^{13}\text{C}$  NMR (100 MHz,  $\text{CDCl}_3$ ):  $\delta$  161.4, 136.2, 132.3, 131.7, 130.8, 130.5, 129.2, 128.7, 126.2, 122.6, 121.6, 112.2, 105.7, 61.6, 14.4; HRMS (ESI,  $m/z$ ) calcd. for  $\text{C}_{17}\text{H}_{14}\text{ClINaO}_2\text{Se}$  [ $\text{M} + \text{Na}$ ] $^+$ : 401.9776; found: 401.9776;  $^{77}\text{Se}$  NMR (76.3 MHz,  $\text{CDCl}_3$ ): 258.0.



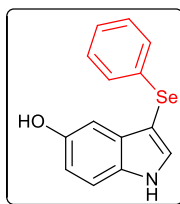

### 3-(Phenylselanyl)-1H-indol-5-ol, 4l<sup>[1]</sup>:

The reaction is conducted for 6 hours by using ethyl 5-hydroxy-indole (26.4 mg, 0.2 mmol) with diphenyl diselenide (0.6 equiv, 37.4 mg) and afforded the desired product as a white solid, 49.1 mg (85% by Method-B).

<sup>1</sup>H NMR (400 MHz, D<sub>6</sub>-DMSO): δ 11.40 (s, 1H), 8.83 (s, 1H), 7.62 (d, *J* = 2.4 Hz, 1H), 7.31 (d, *J* = 8.8 Hz, 1H), 7.19-7.08 (m, 5H), 6.77 (d, *J* = 2.4 Hz, 1H), 6.70 (dd, *J* = 8.4 Hz, 2.4 Hz, 1H); <sup>13</sup>C NMR (100 MHz, D<sub>6</sub>-DMSO): δ 151.6, 133.9, 132.9, 130.9, 130.5, 129.0, 127.8, 125.4, 112.6, 112.4, 102.9, 93.8; HRMS (ESI, *m/z*) calcd. for C<sub>18</sub>H<sub>13</sub>NNaSSe [M + Na]<sup>+</sup>: 311.9904; found: 311.9886.

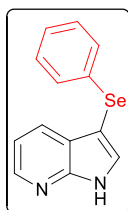

### 3-(Phenylselanyl)-1H-pyrrolo[2,3-b]pyridine, 4m<sup>[3]</sup>:

The reaction is conducted for 2 hours by using 7-azaindole (23.4 mg, 0.2 mmol) with benzeneselenol (1.2 equiv, 37.9 mg) or diphenyl diselenide (0.6 equiv, 37.4 mg) and afforded the desired product as a white solid, 50.9 mg (93% by Method-A) and 47.6 mg (87% by Method-B).

<sup>1</sup>H NMR (400 MHz, D<sub>6</sub>-DMSO): δ 12.25 (s, 1H), 8.28 (d, *J* = 4.4 Hz, 1H), 7.88 (s, 1H), 7.77 (d, *J* = 8.0 Hz, 1H), 7.17-7.10 (m, 6H); <sup>13</sup>C NMR (100 MHz, D<sub>6</sub>-DMSO): δ 148.9, 143.5, 133.4, 133.1, 129.1, 128.3, 127.3, 125.8, 121.8, 116.5, 94.0.

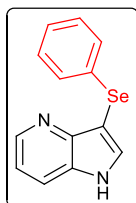

### 3-(Phenylselanyl)-1H-pyrrolo[3,2-b]pyridine, 4n:

The reaction is conducted for 2 hours by using 4-azaindole (23.4 mg, 0.2 mmol) with benzeneselenol (1.2 equiv, 37.9 mg) or diphenyl diselenide (0.6 equiv, 37.4 mg) and afforded the desired product as a white solid, 49.3 mg (90% by Method-A).

$^1\text{H}$  NMR (300 MHz,  $\text{D}_6$ -DMSO):  $\delta$  11.88 (br. s, 1H), 8.37 (d,  $J$  = 4.5 Hz, 1H), 7.99 (d,  $J$  = 1.8 Hz, 1H), 7.87 (d,  $J$  = 8.1 Hz, 1H), 7.22-7.07 (m, 6H);  $^{13}\text{C}$  NMR (75 MHz,  $\text{D}_6$ -DMSO):  $\delta$  147.5, 144.8, 137.5, 135.4, 130.5, 130.3, 129.7, 126.9, 120.7, 118.6, 97.6.

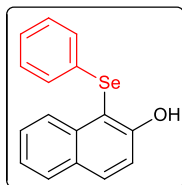

### 1-(Phenylselanyl)naphthalen-2-ol, 4o<sup>[1]</sup>:

The reaction is conducted for 36 hours by using 2-naphthol (28.6mg, 0.2 mmol) with benzeneselenol (1.2 equiv, 37.9 mg) and afforded the desired product as a white solid, 51 mg (85% by Method-A).

$^1\text{H}$  NMR (400 MHz,  $\text{CDCl}_3$ ):  $\delta$  8.29 (d,  $J$  = 8.8 Hz, 1H), 7.89 (d,  $J$  = 8.8 Hz, 1H), 7.79 (d,  $J$  = 8.0 Hz, 1H), 7.52-7.47 (m, 1H), 7.38-7.34 (m, 2H), 7.17-7.12 (m, 6H);  $^{13}\text{C}$  NMR (100 MHz,  $\text{CDCl}_3$ ):  $\delta$  156.3, 135.9, 132.9, 130.6, 129.5, 129.2, 128.6, 128.0, 127.0, 126.7, 123.9, 116.7, 109.1;  $^{77}\text{Se}$  NMR (76.3 MHz,  $\text{CDCl}_3$ ): 152.2.

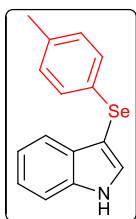

### 3-(p-tolylselanyl)-1H-indole, 4q<sup>[1]</sup>:

The reaction is conducted for 2 hours by using ethyl indole (0.2 mmol, 23.4 mg) with bis(4-methylphenyl) diselenide (41.0 mg, 0.6 equiv.) and afforded the desired product as a white solid, 52.8 mg (92% by Method-B).

$^1\text{H}$  NMR (600 MHz,  $\text{CDCl}_3$ ):  $\delta$  8.46 (br.s, 1H), 7.65 (d,  $J$  = 9.0 Hz, 1H), 7.49 (d,  $J$  = 2.4 Hz, 1H), 7.45 (d,  $J$  = 7.8 Hz, 1H), 7.27 (td,  $J$  = 7.2 Hz, 1.2 Hz, 2H), 7.19-7.17 (m, 3H), 6.97 (d,  $J$  = 7.8 Hz, 2H), 2.25 (s, 3H);  $^{13}\text{C}$  NMR (150 MHz,  $\text{CDCl}_3$ ):  $\delta$  136.3, 135.4, 132.3, 130.9, 129.9, 129.7, 128.9, 122.8, 120.7, 120.4, 111.3, 98.6, 20.9.

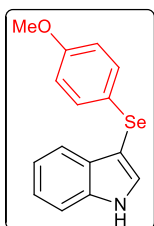

### 3-((4-methoxyphenyl)selanyl)-1H-indole, 4r<sup>[1]</sup>:

The reaction is conducted for 2 hours by using ethyl indole (0.2 mmol, 23.4 mg) with bis(4-methoxyphenyl) diselenide (44.9 mg, 0.6 equiv.) and afforded the desired product as a white solid, 54.5 mg (90% by Method-B).

$^1\text{H}$  NMR (600 MHz,  $\text{CDCl}_3$ ):  $\delta$  8.39 (br.s, 1H), 7.68 (d,  $J$  = 7.8 Hz, 1H), 7.46 (d,  $J$  = 2.4 Hz, 1H), 7.42 (dd,  $J$  = 8.4 Hz, 1.2 Hz, 1H), 7.29-7.26 (m, 3H), 7.19 (t,  $J$  = 7.2 Hz, 1H), 6.74 (d,  $J$  = 8.4 Hz, 2H), 3.74 (s, 3H);  $^{13}\text{C}$  NMR (150 MHz,  $\text{CDCl}_3$ ):  $\delta$  158.3, 136.3, 131.2, 130.6, 129.8, 123.3, 122.8, 120.7, 120.3, 114.7, 111.3, 99.4, 55.2.

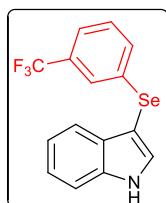

### 3-((3-(trifluoromethyl)phenyl)selanyl)-1H-indole, 4s:

The reaction is conducted for 2 hours by using ethyl indole (0.2 mmol, 23.4 mg) with bis(3-trifluoromethylphenyl) diselenide (53.9 mg, 0.6 equiv.) and afforded the desired product as a white solid, 47.7 mg (70% by Method-B).

$^1\text{H}$  NMR (600 MHz,  $\text{CDCl}_3$ ):  $\delta$  8.54 (br.s, 1H), 7.61 (d,  $J$  = 7.8 Hz, 1H), 7.55 (s, 1H), 7.53 (d,  $J$  = 2.4 Hz, 1H), 7.47 (d,  $J$  = 8.4 Hz, 1H), 7.35 (d,  $J$  = 7.8 Hz, 1H), 7.33-7.28 (m, 2H), 7.22-7.19 (m, 2H);  $^{13}\text{C}$  NMR (150 MHz,  $\text{CDCl}_3$ ):  $\delta$  136.4, 135.2, 131.7, 131.5, 131.1 (q,  $J$  = 32.1 Hz), 129.6, 129.2, 125.0 (q,  $J$  = 3.9 Hz), 123.8 (d,  $J$  = 271.0 Hz), 123.2, 122.3 (q,  $J$  = 3.9 Hz), 121.1, 120.1, 111.5, 97.2; HRMS (ESI,  $m/z$ ) calcd. for  $\text{C}_{15}\text{H}_{11}\text{F}_3\text{NSe}$  [ $\text{M} + \text{H}$ ] $^+$ : 342.0009; found: 342.0006;  $^{77}\text{Se}$  NMR (76.3 MHz,  $\text{CDCl}_3$ ): 225.0.

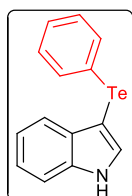

### 3-(phenyltellanyl)-1H-indole, 4t:

The reaction is conducted for 2 hours by using ethyl indole (0.2 mmol, 23.4 mg) with 1,2-diphenylditellane (49.7 mg, 0.6 equiv.) and afforded the desired product as a white solid, 16.1 mg (25% by Method-B).

$^1\text{H}$  NMR (600 MHz,  $\text{CDCl}_3$ ):  $\delta$  8.55 (br.s, 1H), 7.68 (d,  $J$  = 7.8 Hz, 1H), 7.58 (d,  $J$  = 1.8 Hz, 1H), 7.46 (d,  $J$  = 8.4 Hz, 1H), 7.43 (d,  $J$  = 7.2 Hz, 2H), 7.29 (t,  $J$  = 7.2 Hz, 1H), 7.22 (t,  $J$  = 7.2 Hz, 1H), 7.14 (t,  $J$  = 7.2 Hz, 1H), 7.09 (t,  $J$  = 7.2 Hz, 2H);  $^{13}\text{C}$  NMR (150 MHz,  $\text{CDCl}_3$ ):  $\delta$  136.3, 135.5, 134.3, 132.3, 129.1, 126.6, 122.9, 122.1, 120.9, 116.4, 111.1, 81.0.

## Characterization Data for Selenophosphorous Product:

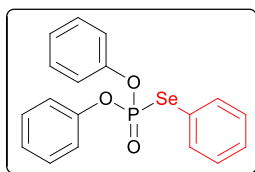

### ***O,O*-Se-triphenyl phosphoroselenoate, 6a:**

The reaction is conducted by using diphenyl phosphite with benzeneselenenyl or diphenyl diselenide and afforded the desired product as a gummy liquid, 54.4 mg (70% by Method-C), 46.7 mg (60% by Method-D).

$^1\text{H}$  NMR (400 MHz,  $\text{CDCl}_3$ ):  $\delta$  7.6-7.5 (m, 2H), 7.4-7.3 (m, 7H), 7.2-7.1 (m, 6H);  $^{13}\text{C}$  NMR (100 MHz,  $\text{CDCl}_3$ ):  $\delta$  150.3 (d,  $J_{\text{C-P}} = 8.5$  Hz), 136.3 (d,  $J_{\text{C-P}} = 4.8$  Hz), 129.9 (d,  $J_{\text{C-P}} = 1.3$  Hz), 129.7 (d,  $J_{\text{C-P}} = 2.5$  Hz), 129.4 (d,  $J_{\text{C-P}} = 2.9$  Hz), 125.7 (d,  $J_{\text{C-P}} = 2.1$  Hz), 122.7 (d,  $J_{\text{C-P}} = 9.1$  Hz), 120.7 (d,  $J_{\text{C-P}} = 5.3$  Hz);  $^{31}\text{P}$  NMR (160 MHz,  $\text{CDCl}_3$ ):  $\delta$  10.09; HRMS (EI,  $m/z$ ) calcd. For  $\text{C}_{18}\text{H}_{15}\text{O}_3\text{PSe}$   $[\text{M}]^+$ : 389.9924; found: 389.9926;  $^{77}\text{Se}$  NMR (76.3 MHz,  $\text{CDCl}_3$ ): 298.4 (d,  $J_{\text{Se-P}} = 544.5$  Hz).

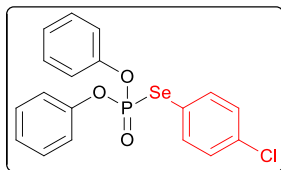

### **Se-(4-chlorophenyl) *O,O*-diphenyl phosphoroselenoate, 6b:**

The reaction is conducted by using diphenyl phosphite (46.8 mg, 0.2mmol) with bis(4-chlorophenyl) diselenide(45.7 mg, 0.6 equiv) and afforded the desired product as a gummy liquid, 33.8 mg (40% by Method-C).

$^1\text{H}$  NMR (600 MHz,  $\text{CDCl}_3$ ):  $\delta$  7.45 (dd,  $J = 8.4$  Hz, 1.8 Hz, 2H), 7.37(t,  $J = 7.8$  Hz, 4H), 7.26 (d,  $J = 9.0$  Hz, 3H), 7.24-7.22 (m, 5H);  $^{13}\text{C}$  NMR (150 MHz,  $\text{CDCl}_3$ ):  $\delta$  150.1 (d,  $J_{\text{C-P}} = 8.7$  Hz), 137.5 (d,  $J_{\text{C-P}} = 4.6$  Hz), 135.9 (d,  $J_{\text{C-P}} = 3.7$  Hz), 129.8, 129.7 (d,  $J_{\text{C-P}} = 2.4$  Hz), 125.7, 120.6, 120.5; IR (neat):  $\nu_{\text{max}}$  3069, 2924, 1589, 1483, 1180, 932, 764  $\text{cm}^{-1}$ ;  $^{31}\text{P}$  NMR (120 MHz,  $\text{CDCl}_3$ ):  $\delta$  8.59; HRMS (EI,  $m/z$ ) calcd. For  $\text{C}_{18}\text{H}_{14}\text{ClO}_3\text{PSe}$   $[\text{M}]^+$ : 423.9534; found: 423.9532.

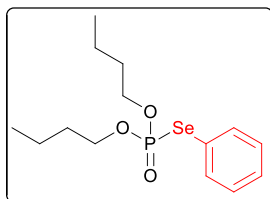

### ***O,O*-Dibutyl Se-phenyl phosphoroselenoate, 6c<sup>[6]</sup>:**

The reaction is conducted by using dibutyl phosphonate with diphenyl diselenide or benzeneselenol and afforded the desired product as a gummy liquid, 49 mg (74% by Method-C) 52.5mg (75% by Method-D).

$^1\text{H}$  NMR (600 MHz,  $\text{CDCl}_3$ ):  $\delta$  7.62 (d,  $J = 7.8$  Hz, 2H), 7.33 (t,  $J = 7.2$  Hz, 1H), 7.30-7.28 (m, 2H), 4.14-4.03 (m, 4H), 1.61 (quin,  $J = 7.2$  Hz, 4H), 1.33 (sex,  $J = 7.8$  Hz, 4H), 0.88 (t,  $J = 7.2$  Hz, 6H);  $^{13}\text{C}$  NMR (150 MHz,  $\text{CDCl}_3$ ):  $\delta$  135.5 (d,  $J_{\text{C-P}} = 4.5$  Hz), 129.4 (d,  $J_{\text{C-P}} = 1.8$  Hz), 128.7 (d,  $J_{\text{C-P}} = 2.5$  Hz), 123.8 (d,  $J_{\text{C-P}} = 8.2$  Hz), 67.6 (d,  $J_{\text{C-P}} = 0.3$  Hz), 32.0 (d,  $J_{\text{C-P}} = 7.2$  Hz), 18.7, 13.6; IR (neat):  $\nu_{\text{max}}$  2960, 1578, 1469, 1256, 1019, 738, 537  $\text{cm}^{-1}$ ;  $^{31}\text{P}$  NMR (120 MHz,  $\text{CDCl}_3$ ):  $\delta$  18.02; HRMS (EI,  $m/z$ ) calcd. For  $\text{C}_{14}\text{H}_{23}\text{O}_3\text{PSe}$   $[\text{M}]^+$ : 350.0550; found: 350.0546.

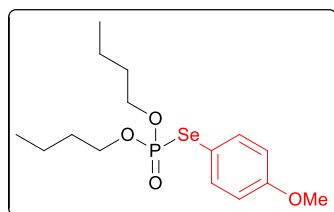

#### ***O,O*-Dibutyl Se-(4-methoxyphenyl) phosphoroselenoate, 6d:**

The reaction is conducted by using dibutyl phosphonate(38.8 mg, 0.2mmol) with bis(4-methoxyphenyl) diselenide(44.7 mg, 0.6 equiv) and afforded the desired product as a gummy liquid, 69.1 mg (91% by Method-C).

$^1\text{H}$  NMR (600 MHz,  $\text{CDCl}_3$ ):  $\delta$  7.54 (dd,  $J = 9.0$  Hz, 2.4 Hz, 2H), 6.84 (d,  $J = 9.0$  Hz, 2H), 4.14-4.04 (m, 4H), 4.09-4.04 (m, 2H), 3.80 (s, 3H), 1.63 (quin,  $J = 7.2$  Hz, 4H), 1.35 (sex,  $J = 7.8$  Hz, 4H), 0.90 (t,  $J = 7.8$  Hz, 6H);  $^{13}\text{C}$  NMR (150 MHz,  $\text{CDCl}_3$ ):  $\delta$  160.2 (d,  $J_{\text{C-P}} = 2.5$  Hz), 137.2 (d,  $J_{\text{C-P}} = 4.2$  Hz), 115.1 (d,  $J_{\text{C-P}} = 2.2$  Hz), 113.5 (d,  $J_{\text{C-P}} = 8.7$  Hz), 67.4 (d,  $J_{\text{C-P}} = 6.4$  Hz), 55.3, 32.0 (d,  $J_{\text{C-P}} = 6.3$  Hz), 18.7, 13.5;  $^{31}\text{P}$  NMR (120 MHz,  $\text{CDCl}_3$ ):  $\delta$  18.40; HRMS (EI,  $m/z$ ) calcd. For  $\text{C}_{15}\text{H}_{25}\text{O}_4\text{PSe}$   $[\text{M}]^+$ : 380.0656; found: 380.0662;  $^{77}\text{Se}$  NMR (76.3 MHz,  $\text{CDCl}_3$ ): 251.2 (d,  $J_{\text{Se-P}} = 491.1$  Hz).

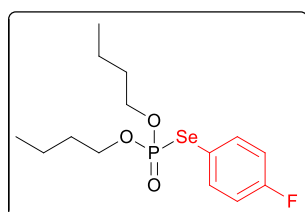

#### ***O,O*-Dibutyl Se-(4-fluorophenyl) phosphoroselenoate, 6e:**

The reaction is conducted by using dibutyl phosphonate(38.8 mg, 0.2mmol) with bis(4-fluorophenyl) diselenide (41.8 mg, 0.6 equiv) and afforded the desired product as a gummy liquid, 58.1 mg (79% by Method-C).

$^1\text{H}$  NMR (600 MHz,  $\text{CDCl}_3$ ):  $\delta$  7.63-7.60 (m, 2H), 7.01 (t,  $J = 8.4$  Hz, 2H), 4.16-4.12 (m, 2H), 4.11-4.04 (m, 2H), 1.63 (quin,  $J = 7.2$  Hz, 4H), 1.35 (sex,  $J = 7.8$  Hz, 4H), 0.91 (t,  $J =$

7.8 Hz, 6H);  $^{13}\text{C}$  NMR (150 MHz,  $\text{CDCl}_3$ ):  $\delta$  163.2 (dd,  $J = 247.6$  Hz, 2.8 Hz), 137.6 (dd,  $J = 8.1$  Hz, 4.3 Hz), 118.3 (dd,  $J = 8.5$  Hz, 3.4 Hz), 116.7 (dd,  $J = 21.7$  Hz, 2.2 Hz), 67.6 (d,  $J = 6.4$  Hz), 32.0 (d,  $J = 7.3$  Hz), 18.6, 13.5; IR (neat):  $\nu_{\text{max}}$  2961, 1484, 1232, 1016, 830, 538  $\text{cm}^{-1}$ ;  $^{31}\text{P}$  NMR (120 MHz,  $\text{CDCl}_3$ ):  $\delta$  18.32; HRMS (ESI,  $m/z$ ) calcd. for  $\text{C}_{14}\text{H}_{22}\text{FNaO}_3\text{PSe}$   $[\text{M} + \text{Na}]^+$ : 391.0354; found: 391.0359.

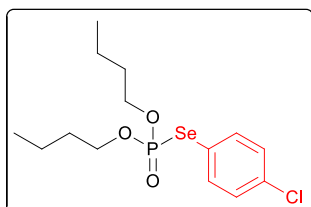

### ***O,O*-Dibutyl Se-(4-chlorophenyl) phosphoroselenoate, 6f<sup>[6]</sup>:**

The reaction is conducted by using dibutyl phosphonate (38.8 mg, 0.2mmol) with bis(4-chlorophenyl) diselenide (45.7 mg, 0.6 equiv) and afforded the desired product as a gummy liquid 58.3 mg (76% by Method-C).

$^1\text{H}$  NMR (600 MHz,  $\text{CDCl}_3$ ):  $\delta$  7.57 (d,  $J = 6.6$  Hz, 2H), 7.28 (d,  $J = 8.4$  Hz, 2H), 4.16-4.11 (m, 2H), 4.1-4.05 (m, 2H), 1.63 (quin,  $J = 6.6$  Hz, 4H), 1.35 (sex,  $J = 7.2$  Hz, 4H), 0.91 (t,  $J = 7.2$  Hz, 6H);  $^{13}\text{C}$  NMR (150 MHz,  $\text{CDCl}_3$ ):  $\delta$  136.7 (d,  $J_{\text{C-P}} = 4.8$  Hz), 135.2 (d,  $J_{\text{C-P}} = 3.1$  Hz), 129.6 (d,  $J_{\text{C-P}} = 2.1$  Hz), 121.9 (d,  $J_{\text{C-P}} = 8.5$  Hz), 67.7 (d,  $J_{\text{C-P}} = 6.6$  Hz), 31.99 (d,  $J_{\text{C-P}} = 7.2$  Hz), 18.6, 13.5; IR (neat):  $\nu_{\text{max}}$  2959, 1470, 1256, 1011, 536  $\text{cm}^{-1}$ ;  $^{31}\text{P}$  NMR (120 MHz,  $\text{CDCl}_3$ ):  $\delta$  17.26; HRMS (EI,  $m/z$ ) calcd. For  $\text{C}_{14}\text{H}_{22}\text{ClO}_3\text{PSe}$   $[\text{M}]^+$ : 384.0160; found: 384.0152.

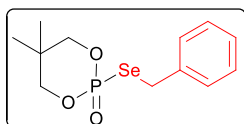

### **2-(Benzylselanyl)-5,5-dimethyl-1,3,2-dioxaphosphinane 2-oxide, 6g:**

The reaction is conducted by using 5,5-dimethyl-1,3,2-dioxaphosphinane 2-oxide (30.0 mg, 0.2 equiv) with dibenzyl diselenide (40.8 mg, 0.6 equiv) and afforded the desired product as a gummy liquid, 41.6 mg (65% by Method-C).

$^1\text{H}$  NMR (600 MHz,  $\text{CDCl}_3$ ):  $\delta$  7.37 (d,  $J = 7.2$  Hz, 2H), 7.30 (t,  $J = 7.2$  Hz, 2H), 7.24 (t,  $J = 7.2$  Hz, 1H), 4.2 (d,  $J = 12.0$  Hz, 2H), 4.0 (dd,  $J = 10.8$  Hz, 4.2 Hz, 2H), 3.84-3.78 (m, 2H), 1.29 (s, 3H), 0.85 (s, 3H);  $^{13}\text{C}$  NMR (150 MHz,  $\text{CDCl}_3$ ):  $\delta$  137.8 (d,  $J_{\text{C-P}} = 5.2$  Hz), 128.99, 128.7, 127.5, 77.6 (d,  $J_{\text{C-P}} = 6.9$  Hz), 32.4 (d,  $J_{\text{C-P}} = 6.6$  Hz), 28.2 (d,  $J_{\text{C-P}} = 4.2$  Hz), 22.2, 20.5; IR (neat):  $\nu_{\text{max}}$  2924, 1458, 1257, 1050, 770, 517  $\text{cm}^{-1}$ ;  $^{31}\text{P}$  NMR (120 MHz,  $\text{CDCl}_3$ ):  $\delta$  13.33; HRMS (ESI,  $m/z$ ) calcd. for  $\text{C}_{12}\text{H}_{17}\text{NaO}_3\text{PSe}$   $[\text{M} + \text{Na}]^+$ : 342.9978; found: 342.9972.

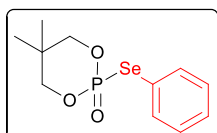

### 5,5-Dimethyl-2-(phenylselanyl)-1,3,2-dioxaphosphinane-2-oxide, 6h:

The reaction is conducted by using 5,5-dimethyl-1,3,2-dioxaphosphinane 2-oxide with diphenyl diselenide or benzeneselenol and afforded the desired product as a gummy liquid 39.6 mg (65% by Method-C), 50.02 mg (82% by Method-D).

$^1\text{H}$  NMR (600 MHz,  $\text{CDCl}_3$ ):  $\delta$  7.72-7.71 (m, 2H), 7.37 (td,  $J = 7.2$  Hz, 1.2 Hz, 1H), 7.34-7.31 (m, 2H), 4.16 (dd,  $J = 10.8$  Hz, 4.2 Hz, 2H), 3.90-3.84 (m, 2H), 1.28 (s, 3H), 0.87 (s, 3H);  $^{13}\text{C}$  NMR (150 MHz,  $\text{CDCl}_3$ ):  $\delta$  135.9 (d,  $J_{\text{C-P}} = 9.3$  Hz), 129.6 (d,  $J_{\text{C-P}} = 4.2$  Hz), 129.0 (d,  $J_{\text{C-P}} = 5.2$  Hz), 121.8 (d,  $J_{\text{C-P}} = 15.9$  Hz), 32.5 (d,  $J_{\text{C-P}} = 13.9$  Hz), 22.1, 20.4; IR (neat):  $\nu_{\text{max}}$  2967, 2926, 1472, 1265, 988, 778, 530  $\text{cm}^{-1}$ ;  $^{31}\text{P}$  NMR (120 MHz,  $\text{CDCl}_3$ ):  $\delta$  9.65; HRMS (EI,  $m/z$ ) calcd. For  $\text{C}_{11}\text{H}_{15}\text{O}_3\text{PSe}$   $[\text{M}]^+$ : 305.9924; found: 305.9921;  $^{77}\text{Se}$  NMR (76.3 MHz,  $\text{CDCl}_3$ ): 248.1 (d,  $J_{\text{Se-P}} = 479.6$  Hz).

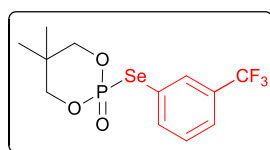

### 5,5-Dimethyl-2-((3-(trifluoromethyl)phenyl)selanyl)-1,3,2-dioxaphosphinane 2-oxide, 6i:

The reaction is conducted by using 5,5-dimethyl-1,3,2-dioxaphosphinane 2-oxide (30.0 mg, 0.2 equiv) with bis(3-trifluoromethylphenyl) diselenide (53.9 mg, 0.6 equiv) and afforded the desired product as a gummy liquid, 51.4 mg (69% by Method-C).

$^1\text{H}$  NMR (600 MHz,  $\text{CDCl}_3$ ):  $\delta$  7.96 (d,  $J = 7.8$  Hz, 1H), 7.93 (s, 1H), 7.63 (d,  $J = 7.8$  Hz, 1H), 7.63 (d,  $J = 7.8$  Hz, 1H), 7.46 (t,  $J = 7.8$  Hz, 1H), 4.18 (dd,  $J = 10.8$  Hz, 4.2 Hz, 2H), 3.95-3.89 (m, 2H), 1.29 (s, 3H), 0.89 (s, 3H);  $^{13}\text{C}$  NMR (150 MHz,  $\text{CDCl}_3$ ):  $\delta$  139.2 (d,  $J = 4.2$  Hz), 132.2-132.1 (m), 131.8 (dd,  $J = 32.5$  Hz, 3.4 Hz), 130.0 (d,  $J = 2.1$  Hz), 126.1-125.8 (m), 123.4 ( $J = 271.2$  Hz), 123.0 ( $J = 7.8$  Hz), 32.5 (d,  $J = 6.7$  Hz), 22.0, 20.3; IR (neat):  $\nu_{\text{max}}$  2927, 1320, 1055, 773, 519  $\text{cm}^{-1}$ ;  $^{31}\text{P}$  NMR (120 MHz,  $\text{CDCl}_3$ ):  $\delta$  17.66, 17.62; HRMS (ESI,  $m/z$ ) calcd. for  $\text{C}_{12}\text{H}_{15}\text{F}_3\text{O}_3\text{PSe}$   $[\text{M} + \text{H}]^+$ : 374.9876; found: 374.9857;  $^{77}\text{Se}$  NMR (76.3 MHz,  $\text{CDCl}_3$ ): 260.6 (d,  $J_{\text{Se-P}} = 477.0$  Hz).

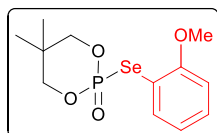

### 2-((2-Methoxyphenyl)selanyl)-5,5-dimethyl-1,3,2-dioxaphosphinane 2-oxide, 6j:

The reaction is conducted by using 5,5-dimethyl-1,3,2-dioxaphosphinane 2-oxide (30.0 mg, 0.2 equiv) with bis(2-methoxyphenyl) diselenide (44.7 mg, 0.6 equiv) and afforded the desired product as a gummy liquid, 52.4 mg (78% by Method-C).

$^1\text{H}$  NMR (600 MHz,  $\text{CDCl}_3$ ):  $\delta$  7.83 (d,  $J = 7.8$  Hz, 1H), 7.33 (t,  $J = 7.8$  Hz, 1H), 6.93-6.90 (m, 2H), 4.23 (dd,  $J = 10.8$  Hz, 3.6 Hz, 2H), 3.88 (s, 3H), 3.86-3.80 (m, 2H), 1.29 (s, 3H), 0.87 (s, 3H);  $^{13}\text{C}$  NMR (150 MHz,  $\text{CDCl}_3$ ):  $\delta$  158.6 (d,  $J_{\text{C-P}} = 4.3$  Hz), 137.2 (d,  $J_{\text{C-P}} = 3.9$

Hz), 130.5 (d,  $J_{C-P} = 2.2$  Hz), 121.9 (d,  $J_{C-P} = 2.2$  Hz), 111.2 (d,  $J_{C-P} = 2.1$  Hz), 78.1 (d,  $J_{C-P} = 7.2$  Hz), 55.9, 32.5 (d,  $J_{C-P} = 6.7$  Hz), 22.2, 20.4;  $^{31}\text{P}$  NMR (120 MHz,  $\text{CDCl}_3$ ):  $\delta$  9.57; HRMS (EI,  $m/z$ ) calcd. For  $\text{C}_{12}\text{H}_{17}\text{O}_4\text{PSe}$   $[\text{M}]^+$ : 336.0030; found: 336.0022;  $^{77}\text{Se}$  NMR (76.3 MHz,  $\text{CDCl}_3$ ): 171.1 (d,  $J_{\text{Se-P}} = 481.4$  Hz).

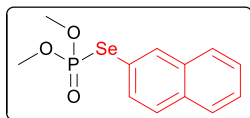

#### ***O,O*-Dimethyl Se-naphthalen-2-yl phosphoroselenoate, 6k:**

The reaction is conducted by using dimethyl phosphonate (22.0 mg, 0.2 mmol) with bis(2-naphthyl) diselenide (49.5 mg, 0.6 equiv) and afforded the desired product as a gummy liquid, 49.7 mg (79% by Method-C).

$^1\text{H}$  NMR (600 MHz,  $\text{CDCl}_3$ ):  $\delta$  8.47 (d,  $J = 8.4$  Hz, 1H), 7.99 (dd,  $J = 7.8$  Hz, 3.0 Hz, 1H), 7.91 (d,  $J = 8.4$  Hz, 1H), 7.86 (d,  $J = 7.8$  Hz, 1H), 7.62 (t,  $J = 7.2$  Hz, 1H), 7.55 (t,  $J = 7.2$  Hz, 1H), 7.43 (t,  $J = 7.8$  Hz, 1H), 3.75 (s, 3H), 3.73 (s, 3H);  $^{13}\text{C}$  NMR (150 MHz,  $\text{CDCl}_3$ ):  $\delta$  136.6 (d,  $J_{C-P} = 4.9$  Hz), 134.9 (d,  $J_{C-P} = 3.3$  Hz), 134.2 (d,  $J_{C-P} = 2.1$  Hz), 130.4 (d,  $J_{C-P} = 3.3$  Hz), 128.7, 127.9, 127.2, 126.5, 125.9 (d,  $J_{C-P} = 3.1$  Hz), 122.5 (d,  $J_{C-P} = 9.3$  Hz), 54.1 (d,  $J_{C-P} = 6.0$  Hz); IR (neat):  $\nu_{\text{max}}$  2951, 2850, 1500, 1254, 1019, 768, 525  $\text{cm}^{-1}$ ;  $^{31}\text{P}$  NMR (120 MHz,  $\text{CDCl}_3$ ):  $\delta$  21.06; HRMS (EI,  $m/z$ ) calcd. For  $\text{C}_{12}\text{H}_{13}\text{O}_3\text{PSe}$   $[\text{M}]^+$ : 315.9768; found: 315.9760;  $^{77}\text{Se}$  NMR (76.3 MHz,  $\text{CDCl}_3$ ): 184.3 (d,  $J_{\text{Se-P}} = 499.3$  Hz).

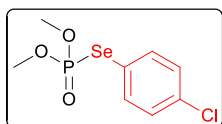

#### **Se-(4-chlorophenyl) *O,O*-dimethyl phosphoroselenoate, 6l<sup>[6]</sup>:**

The reaction is conducted by using dimethyl phosphonate (22.0 mg, 0.2 mmol) with bis(4-chlorophenyl) diselenide (45.7 mg, 0.6 equiv) and afforded the desired product as a gummy liquid, 41.8 mg (70% by Method-C).

$^1\text{H}$  NMR (600 MHz,  $\text{CDCl}_3$ ):  $\delta$  7.57 (dd,  $J = 9.0$  Hz, 1.8 Hz, 2H), 7.30 (d,  $J = 8.4$  Hz, 2H), 3.82 (s, 3H), 3.79 (s, 3H);  $^{13}\text{C}$  NMR (150 MHz,  $\text{CDCl}_3$ ):  $\delta$  136.8 (d,  $J_{C-P} = 4.8$  Hz), 135.5 (d,  $J_{C-P} = 3.1$  Hz), 129.8 (d,  $J_{C-P} = 2.5$  Hz), 121.3 (d,  $J_{C-P} = 8.7$  Hz), 54.1 (d,  $J_{C-P} = 5.8$  Hz); IR (neat):  $\nu_{\text{max}}$  2951, 2851, 1470, 1256, 1017, 822, 526  $\text{cm}^{-1}$ ;  $^{31}\text{P}$  NMR (120 MHz,  $\text{CDCl}_3$ ):  $\delta$  21.17; HRMS (EI,  $m/z$ ) calcd. For  $\text{C}_8\text{H}_{10}\text{ClO}_3\text{PSe}$   $[\text{M}]^+$ : 299.9221; found: 299.9230.

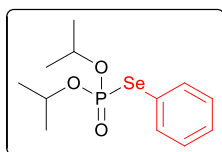

#### ***O,O*-Diisopropyl Se-phenyl phosphoroselenoate, 6m<sup>[6]</sup>:**



The reaction is conducted by using diisopropyl Phosphite with benzeneselenol and afforded the desired product as a gummy liquid, 45.1 mg (70% by Method-D).

$^1\text{H}$  NMR (400 MHz,  $\text{CDCl}_3$ ):  $\delta$  7.65-7.63 (m, 2H), 7.33-7.25 (m, 3H), 4.80-4.72 (m, 2H), 1.31 (d,  $J = 6.4$  Hz, 6H), 1.23 (d,  $J = 6.0$  Hz, 6H);  $^{13}\text{C}$  NMR (100 MHz,  $\text{CDCl}_3$ ):  $\delta$  135.2 (d,  $J_{\text{C-P}} = 19.2$  Hz), 129.4 (d,  $J_{\text{C-P}} = 8.0$  Hz), 128.6 (d,  $J_{\text{C-P}} = 9.6$  Hz), 124.6 (d,  $J_{\text{C-P}} = 34.4$  Hz), 73.2 (d,  $J_{\text{C-P}} = 26.4$  Hz), 23.9 (d,  $J_{\text{C-P}} = 15.2$  Hz), 23.6 (d,  $J_{\text{C-P}} = 24.4$  Hz);  $^{31}\text{P}$  NMR (160 MHz,  $\text{CDCl}_3$ ):  $\delta$  15.40; HRMS (ESI,  $m/z$ ) calcd. for  $\text{C}_{12}\text{H}_{20}\text{O}_3\text{PSe}$   $[\text{M} + \text{H}]^+$ : 323.0315; found: 323.0321.

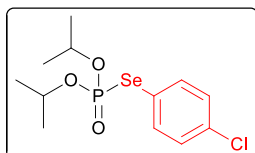

#### Se-(4-chlorophenyl) *O,O*-diisopropyl phosphoroselenoate, **6n**<sup>[6]</sup>:

The reaction is conducted by using diisopropyl (33.2 mg, 0.2 mmol) with bis(4-chlorophenyl) diselenide (45.7 mg, 0.6 equiv) and afforded the desired product as a gummy liquid, 56.1 mg (79% by using Method-C).

$^1\text{H}$  NMR (600 MHz,  $\text{CDCl}_3$ ):  $\delta$  7.60 (dd,  $J = 8.4$  Hz, 1.8 Hz, 2H), 7.28 (d,  $J = 8.4$  Hz, 2H), 4.81-4.75 (m, 2H), 1.34 (d,  $J = 6.6$  Hz, 6H), 1.28 (d,  $J = 6.6$  Hz, 6H);  $^{13}\text{C}$  NMR (150 MHz,  $\text{CDCl}_3$ ):  $\delta$  136.4 (d,  $J_{\text{C-P}} = 4.8$  Hz), 134.9 (d,  $J_{\text{C-P}} = 2.7$  Hz), 129.5 (d,  $J_{\text{C-P}} = 1.9$  Hz), 122.7 (d,  $J_{\text{C-P}} = 8.4$  Hz), 73.3 (d,  $J_{\text{C-P}} = 6.6$  Hz), 23.8 (d,  $J_{\text{C-P}} = 3.7$  Hz), 23.5 (d,  $J_{\text{C-P}} = 5.7$  Hz);  $^{31}\text{P}$  NMR (120 MHz,  $\text{CDCl}_3$ ):  $\delta$  13.88; HRMS (EI,  $m/z$ ) calcd. For  $\text{C}_{12}\text{H}_{18}\text{ClO}_3\text{PSe}$   $[\text{M}]^+$ : 355.9847; found: 355.9831.

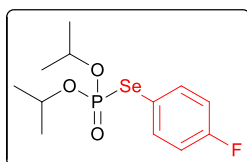

#### Se-(4-fluorophenyl) *O,O*-diisopropyl phosphoroselenoate, **6o**:

The reaction is conducted by using diisopropyl phosphonate (33.2 mg, 0.2 mmol) with bis(4-fluorophenyl) diselenide (41.8 mg, 0.6 equiv) and afforded the desired product as a gummy liquid, 47.6 mg (70% by Method-C).

$^1\text{H}$  NMR (600 MHz,  $\text{CDCl}_3$ ):  $\delta$  7.66-7.63 (m, 2H), 7.01 (t,  $J = 9.0$  Hz, 2H), 4.80-4.75 (m, 2H), 1.34 (d,  $J = 6.0$  Hz, 6H), 1.27 (d,  $J = 6.6$  Hz, 6H);  $^{13}\text{C}$  NMR (150 MHz,  $\text{CDCl}_3$ ):  $\delta$  163.1 (dd,  $J = 247.5$  Hz, 2.7 Hz), 137.3 (dd,  $J = 8.2$  Hz, 4.3 Hz), 119.0 (dd,  $J = 8.4$  Hz, 3.4 Hz), 116.6 (dd,  $J = 21.6$  Hz, 1.8 Hz), 73.2 (d,  $J = 6.6$  Hz), 23.8 (d,  $J = 3.9$  Hz), 23.5 (d,  $J = 5.5$  Hz); IR (neat):  $\nu_{\text{max}}$  2981, 1486, 1248, 980, 569  $\text{cm}^{-1}$ ;  $^{31}\text{P}$  NMR (120 MHz,  $\text{CDCl}_3$ ):  $\delta$  14.28, 14.25; HRMS (ESI,  $m/z$ ) calcd. for  $\text{C}_{12}\text{H}_{18}\text{FNaO}_3\text{PSe}$   $[\text{M} + \text{Na}]^+$ : 363.0041; found: 363.0046.

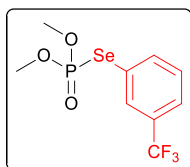

### ***O,O*-Dimethyl Se-(3-(trifluoromethyl)phenyl) phosphoroselenoate, 6p:**

The reaction is conducted by using dimethyl phosphonate (22.0 mg, 0.2mmol) with bis(3-trifluoromethylphenyl) diselenide (53.9 mg, 0.6 equiv) and afforded the desired product as a gummy liquid, 47.3 mg (71% by Method-C).

$^1\text{H}$  NMR (600 MHz,  $\text{CDCl}_3$ ):  $\delta$  7.9 (s, 1H), 7.86 (d,  $J = 7.8$  Hz, 1H), 7.64 (d,  $J = 7.8$  Hz, 1H), 7.47 (t,  $J = 7.8$  Hz, 1H), 3.83 (s, 3H), 3.81 (s, 3H);  $^{13}\text{C}$  NMR (150 MHz,  $\text{CDCl}_3$ ):  $\delta$  138.8 (d,  $J = 4.2$  Hz), 132.2-132.1 (m), 131.8 (dd,  $J = 32.4$  Hz, 1.6 Hz), 129.9 (d,  $J = 2.1$  Hz), 125.8-125.7 (m), 124.4 (d,  $J = 8.4$  Hz), 123.3 (d,  $J = 271.0$  Hz) 54.2 (d,  $J = 5.8$  Hz); IR (neat):  $\nu_{\text{max}}$  2955, 1320, 1025, 792, 526  $\text{cm}^{-1}$ ;  $^{31}\text{P}$  NMR (160 MHz,  $\text{CDCl}_3$ ):  $\delta$  21.25; HRMS (EI,  $m/z$ ) calcd. For  $\text{C}_9\text{H}_9\text{F}_3\text{O}_3\text{PSe}$   $[\text{M}]^+$ : 333.9485; found: 333.9491.

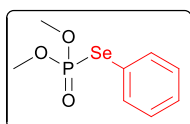

### ***O,O*-Dimethyl Se-phenyl phosphoroselenoate, 6q<sup>[7]</sup>:**

The reaction is conducted by using dimethyl phosphonate with diphenyl diselenide or benzeneselenol and afforded the desired product as a gummy liquid, 45.6 mg (86% by Method-A) 42.9 mg (81% by Method-C), 32.2 mg (75% by Method-D).

$^1\text{H}$  NMR (600 MHz,  $\text{CDCl}_3$ ):  $\delta$  7.66-7.64 (m, 2H), 7.38 (td,  $J = 7.2, 1.2$  Hz, 1H), 7.35-7.32 (m, 2H), 3.82 (s, 3H), 3.80 (s, 3H);  $^{13}\text{C}$  NMR (150 MHz,  $\text{CDCl}_3$ ):  $\delta$  135.6 (d,  $J_{\text{C-P}} = 4.5$  Hz), 129.6 (d,  $J_{\text{C-P}} = 2.2$  Hz), 128.9 (d,  $J_{\text{C-P}} = 2.7$  Hz), 123.2 (d,  $J_{\text{C-P}} = 8.7$  Hz), 53.9 (d,  $J_{\text{C-P}} = 5.5$  Hz); IR (neat):  $\nu_{\text{max}}$  2951, 2851, 1577, 1446, 1254, 1020, 524  $\text{cm}^{-1}$ ;  $^{31}\text{P}$  NMR (160 MHz,  $\text{CDCl}_3$ ):  $\delta$  22.61; HRMS (EI,  $m/z$ ) calcd. For  $\text{C}_8\text{H}_{11}\text{O}_3\text{PSe}$   $[\text{M}]^+$ : 265.9611; found: 265.9618.

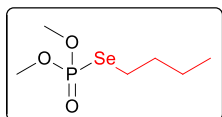

### **Se-butyl *O,O*-dimethyl phosphoroselenoate, 6r<sup>[8]</sup>:**

The reaction is conducted by using dimethyl phosphonate (22.0 mg, 0.2mmol) with dibutyl diselenide (32.7 mg, 0.6 equiv) and afforded the desired product as a gummy liquid, 24.5mg (50% by Method-C).

$^1\text{H}$  NMR (600 MHz,  $\text{CDCl}_3$ ):  $\delta$  3.80 (s, 3H), 3.78 (s, 3H), 2.91-2.86 (m, 2H), 1.76 (quin,  $J = 7.2$  Hz, 2H), 1.43 (sex,  $J = 7.2$  Hz, 2H), 0.94 (t,  $J = 7.2$  Hz, 3H);  $^{13}\text{C}$  NMR (150 MHz,  $\text{CDCl}_3$ ):  $\delta$  53.5 (d,  $J_{\text{C-P}} = 5.5$  Hz), 33.2 (d,  $J_{\text{C-P}} = 4.3$  Hz), 26.2 (d,  $J_{\text{C-P}} = 4.5$  Hz), 22.7, 13.4;

IR (neat):  $\nu_{\max}$  2927, 2856, 1458, 1255, 1023, 770, 527  $\text{cm}^{-1}$ ;  $^{31}\text{P}$  NMR (120 MHz,  $\text{CDCl}_3$ ):  $\delta$  25.25.

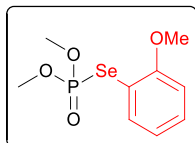

**Se-(2-methoxyphenyl) *O,O*-dimethyl phosphoroselenoate, 6s:**

The reaction is conducted by using dimethyl phosphonate (22.0 mg, 0.2mmol) with bis(2-methoxyphenyl) diselenide (44.7 mg, 0.6 equiv) and afforded the desired product as a gummy liquid, 42.5mg (72% by Method-C).

$^1\text{H}$  NMR (600 MHz,  $\text{CDCl}_3$ ):  $\delta$  7.67 (d,  $J = 7.8$  Hz, 1H), 7.34 (t,  $J = 7.8$  Hz, 1H), 6.93-6.91 (m, 2H), 3.89 (s, 3H), 3.82 (s, 3H), 3.80 (s, 3H);  $^{13}\text{C}$  NMR (150 MHz,  $\text{CDCl}_3$ ):  $\delta$  158.7 (d,  $J_{\text{C-P}} = 4.3$  Hz), 136.9 (d,  $J_{\text{C-P}} = 3.9$  Hz), 130.6 (d,  $J_{\text{C-P}} = 2.4$  Hz), 121.7 (d,  $J_{\text{C-P}} = 2.1$  Hz), 112.5 (d,  $J_{\text{C-P}} = 8.1$  Hz), 111.2 (d,  $J_{\text{C-P}} = 2.2$  Hz), 55.9, 53.8 (d,  $J_{\text{C-P}} = 5.2$  Hz); IR (neat):  $\nu_{\max}$  2950, 2846, 1471, 1251, 1019, 526  $\text{cm}^{-1}$ ;  $^{31}\text{P}$  NMR (120 MHz,  $\text{CDCl}_3$ ):  $\delta$  22.44; HRMS (EI,  $m/z$ ) calcd. For  $\text{C}_9\text{H}_{13}\text{O}_4\text{PSe}$   $[\text{M}]^+$ : 295.9717; found: 295.9710;  $^{77}\text{Se}$  NMR (76.3 MHz,  $\text{CDCl}_3$ ): 160.8 (d,  $J_{\text{Se-P}} = 501.4$  Hz).

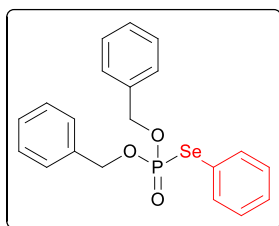

***O,O*-Dibenzyl Se-phenyl phosphoroselenoate, 6t<sup>[7]</sup>:**

The reaction is conducted by using diphenyl phosphite with dibenzyl diselenide or benzeneselenol and afforded the desired product as a gummy liquid, 62.7 mg (75% by Method-C), 66.8 mg (80% by Method-D).

$^1\text{H}$  NMR (600 MHz,  $\text{CDCl}_3$ ):  $\delta$  7.58 (d,  $J = 7.2$  Hz, 2H), 7.37-7.33 (m, 7H), 7.30-7.25 (m, 6H), 5.17-5.10 (m, 4H);  $^{13}\text{C}$  NMR (150 MHz,  $\text{CDCl}_3$ ):  $\delta$  135.8 (d,  $J_{\text{C-P}} = 4.8$  Hz), 135.2 (d,  $J_{\text{C-P}} = 7.8$  Hz), 129.5 (d,  $J_{\text{C-P}} = 2.1$  Hz), 128.9 (d,  $J_{\text{C-P}} = 2.7$  Hz), 128.5, 128.5, 128.0, 123.2 (d,  $J_{\text{C-P}} = 8.7$  Hz), 69.1 (d,  $J_{\text{C-P}} = 6.0$  Hz); IR (neat):  $\nu_{\max}$  3060, 2945, 1579, 1455, 1253, 991, 738, 529  $\text{cm}^{-1}$ ;  $^{31}\text{P}$  NMR (120 MHz,  $\text{CDCl}_3$ ):  $\delta$  0.54; HRMS (EI,  $m/z$ ) calcd. For  $\text{C}_{20}\text{H}_{19}\text{O}_3\text{PSe}$   $[\text{M}]^+$ : 418.0237; found: 418.0224.

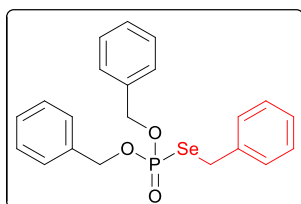

### ***O,O*-Se-tribenzyl phosphoroselenoate, 6u:**

The reaction is conducted by using dibenzyl phosphonate (52.4 mg, 0.2 mmol) with dibenzyl diselenide (40.8 mg, 0.6 equiv) and afforded the desired product as a gummy liquid, 47.5mg (55% by Method-C).

$^1\text{H}$  NMR (600 MHz,  $\text{CDCl}_3$ ):  $\delta$  7.40-7.36 (m, 10H), 7.31-7.23 (m, 5H), 5.13-5.10 (m, 2H), 5.04-5.00 (m, 2H), 4.06 (d,  $J$  = 12.6 Hz, 2H);  $^{13}\text{C}$  NMR (150 MHz,  $\text{CDCl}_3$ ):  $\delta$  138.0 (d,  $J_{\text{C-P}}$  = 5.1 Hz), 135.3 (d,  $J_{\text{C-P}}$  = 7.8 Hz), 128.9, 128.7, 128.6, 128.1, 127.4, 126.9, 68.7 (d,  $J_{\text{C-P}}$  = 5.4 Hz), 29.7 (d,  $J_{\text{C-P}}$  = 4.5 Hz); IR (neat):  $\nu_{\text{max}}$  3032, 2933, 1495, 1455, 1252, 991, 740, 530  $\text{cm}^{-1}$ ;  $^{31}\text{P}$  NMR (120 MHz,  $\text{CDCl}_3$ ):  $\delta$  21.18; HRMS (EI,  $m/z$ ) calcd. For  $\text{C}_{21}\text{H}_{21}\text{O}_3\text{PSe}$   $[\text{M}]^+$ : 432.0394; found: 432.0387.

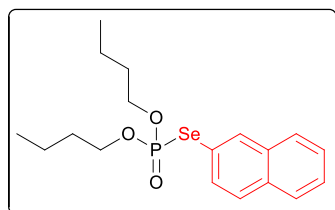

### ***O,O*-Dibutyl Se-naphthalen-2-yl phosphoroselenoate, 6v:**

The reaction is conducted by using dibutyl phosphonate (38.8 mg, 0.2mmol) with bis(2-naphthyl) diselenide (49.5 mg, 0.6 equiv) and afforded the desired product as a gummy liquid, 59.2mg (74% by Method-C).

$^1\text{H}$  NMR (600 MHz,  $\text{CDCl}_3$ ):  $\delta$  8.18 (s, 1H), 7.85-7.83 (m, 1H), 7.81-7.78 (m, 2H), 7.70 (d,  $J$  = 8.4 Hz, 1H), 7.54-7.51 (m, 2H), 4.19-4.10 (m, 4H), 1.64 (quin,  $J$  = 6.6 Hz, 4H), 1.34 (sex,  $J$  = 7.8 Hz, 4H), 0.88 (t,  $J$  = 7.8 Hz, 6H);  $^{13}\text{C}$  NMR (150 MHz,  $\text{CDCl}_3$ ):  $\delta$  135.2 (d,  $J_{\text{C-P}}$  = 5.8 Hz), 133.8 (d,  $J_{\text{C-P}}$  = 2.2 Hz), 132.9 (d,  $J_{\text{C-P}}$  = 1.9 Hz), 131.98 (d,  $J_{\text{C-P}}$  = 3.7 Hz), 128.9 (d,  $J_{\text{C-P}}$  = 1.2 Hz), 127.7, 127.5, 126.8, 126.6, 121.0 (d,  $J_{\text{C-P}}$  = 8.7 Hz), 67.6 (d,  $J_{\text{C-P}}$  = 6.3 Hz), 32.0 (d,  $J_{\text{C-P}}$  = 7.2 Hz), 18.7, 13.5; IR (neat):  $\nu_{\text{max}}$  2958, 1462, 1253, 1018, 537  $\text{cm}^{-1}$ ;  $^{31}\text{P}$  NMR (120 MHz,  $\text{CDCl}_3$ ):  $\delta$  17.96; HRMS (EI,  $m/z$ ) calcd. For  $\text{C}_{18}\text{H}_{25}\text{O}_3\text{PSe}$   $[\text{M}]^+$ : 400.0707; found: 400.0702;  $^{77}\text{Se}$  NMR (76.3 MHz,  $\text{CDCl}_3$ ): 266.1 (d,  $J_{\text{Se-P}}$  = 484.2 Hz).

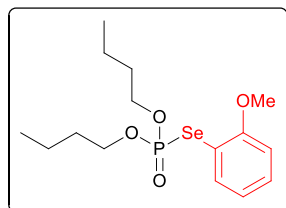

### ***O,O*-Dibutyl Se-(2-methoxyphenyl) phosphoroselenoate, 6w:**

The reaction is conducted by using dibutyl phosphite (49.5 mg, 0.6 equiv) with diphenyl diselenide (44.7 mg, 0.6 equiv) and afforded the desired product as a gummy liquid, 57.7 mg (76% by Method-C).

$^1\text{H}$  NMR (400 MHz,  $\text{CDCl}_3$ ):  $\delta$  7.69 (dt,  $J = 7.6$  Hz, 1.6, 1H), 7.33-7.29 (m, 1H), 6.92-6.88 (m, 2H), 4.17-4.08 (m, 4H), 3.87 (s, 3H), 1.63 (quin,  $J = 6.8$  Hz, 4H), 1.39-1.30 (m, 4H), 0.89 (t,  $J = 7.2$  Hz, 6H);  $^{13}\text{C}$  NMR (100 MHz,  $\text{CDCl}_3$ ):  $\delta$  136.6 (d,  $J = 15.6$  Hz), 130.3 (d,  $J = 8.4$  Hz), 121.7 (d,  $J = 7.6$  Hz), 111.1 (d,  $J = 7.6$  Hz), 67.5 (d,  $J = 24.8$  Hz), 55.9, 32.1 (d,  $J = 28.8$  Hz), 18.8, 13.7; IR (neat):  $\nu_{\text{max}}$  2960, 1580, 1470, 1251, 1020, 538  $\text{cm}^{-1}$ ;  $^{31}\text{P}$  NMR (120 MHz,  $\text{CDCl}_3$ ):  $\delta$  18.30; HRMS (EI,  $m/z$ ) calcd. For  $\text{C}_{15}\text{H}_{25}\text{O}_4\text{PSe}$   $[\text{M}]^+$ : 380.0656; found: 380.0653.

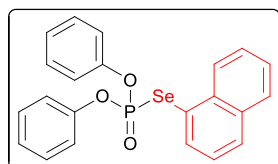

### Se-naphthalen-1-yl *O,O*-diphenyl phosphoroselenoate, 6x:

The reaction is conducted by using diphenyl phosphite (46.8 mg, 0.2mmol) with bis(1-naphthyl) diselenide (49.5 mg, 0.6 equiv) and afforded the desired product as a gummy liquid, 37.8 mg (43% by Method-C).

$^1\text{H}$  NMR (600 MHz,  $\text{CDCl}_3$ ):  $\delta$  8.19 (d,  $J = 8.4$  Hz, 1H), 7.93-7.91 (m, 2H), 7.85 (d,  $J = 8.4$  Hz, 1H), 7.51 (t,  $J = 7.8$  Hz, 1H), 7.45 (t,  $J = 7.8$  Hz, 1H), 7.39 (t,  $J = 7.8$  Hz, 1H), 7.31-7.28 (m, 4H), 7.19 (t,  $J = 7.2$  Hz, 2H), 7.14-7.13 (m, 4H);  $^{13}\text{C}$  NMR (150 MHz,  $\text{CDCl}_3$ ):  $\delta$  150.2 (d,  $J_{\text{C-P}} = 8.7$  Hz), 137.2 (d,  $J_{\text{C-P}} = 5.4$  Hz), 134.9 (d,  $J_{\text{C-P}} = 3.3$  Hz), 134.2 (d,  $J_{\text{C-P}} = 2.5$  Hz), 130.8 (d,  $J_{\text{C-P}} = 3.6$  Hz), 129.7, 128.4, 128.1, 127.2, 126.5, 125.8 (d,  $J_{\text{C-P}} = 3.7$  Hz), 125.4 (d,  $J_{\text{C-P}} = 0.9$  Hz), 122.0 (d,  $J_{\text{C-P}} = 9.9$  Hz), 120.4 (d,  $J_{\text{C-P}} = 5.1$  Hz); IR (neat):  $\nu_{\text{max}}$  3060, 2925, 1590, 1489, 1187, 932, 511  $\text{cm}^{-1}$ ;  $^{31}\text{P}$  NMR (120 MHz,  $\text{CDCl}_3$ ):  $\delta$  8.60; HRMS (ESI,  $m/z$ ) calcd. for  $\text{C}_{22}\text{H}_{18}\text{O}_3\text{PSe}$   $[\text{M} + \text{H}]^+$ : 441.0159; found: 441.0155.

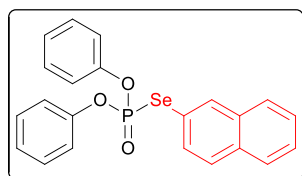

### Se-naphthalen-2-yl *O,O*-diphenyl phosphoroselenoate, 6y:

The reaction is conducted by using diphenyl phosphite (46.8 mg, 0.2mmol) with bis(2-naphthyl) diselenide (49.5 mg, 0.6 equiv) and afforded the desired product as a gummy liquid, 71.3 mg (81% by using Method-C).

$^1\text{H}$  NMR (600 MHz,  $\text{CDCl}_3$ ):  $\delta$  8.01 (s, 1H), 7.85 (d,  $J = 7.8$  Hz, 1H), 7.78 (d,  $J = 8.4$  Hz, 1H), 7.74 (d,  $J = 7.2$  Hz, 1H), 7.60 (d,  $J = 9.0$  Hz, 1H), 7.57-7.52 (m, 2H), 7.87-7.34 (m, 4H), 7.25-7.22 (m, 7H);  $^{13}\text{C}$  NMR (150 MHz,  $\text{CDCl}_3$ ):  $\delta$  150.2 (d,  $J_{\text{C-P}} = 8.2$  Hz), 136.4 (d,  $J_{\text{C-P}} = 6.0$  Hz), 133.7 (d,  $J_{\text{C-P}} = 2.7$  Hz), 133.1 (d,  $J_{\text{C-P}} = 2.1$  Hz), 132.3 (d,  $J_{\text{C-P}} = 3.6$  Hz), 129.8, 129.1 (d,  $J_{\text{C-P}} = 2.2$  Hz), 127.7 (d,  $J_{\text{C-P}} = 4.3$  Hz), 127.2, 126.7, 125.6, 120.6 (d,  $J_{\text{C-P}} = 5.1$  Hz), 119.7 (d,  $J_{\text{C-P}} = 9.6$  Hz); IR (neat):  $\nu_{\text{max}}$  2924, 1589, 1488, 1185, 932, 521  $\text{cm}^{-1}$ ;  $^{31}\text{P}$  NMR (120 MHz,  $\text{CDCl}_3$ ):  $\delta$  9.84; HRMS (ESI,  $m/z$ ) calcd. for  $\text{C}_{22}\text{H}_{17}\text{NaO}_3\text{PSe}$   $[\text{M} + \text{Na}]^+$ : 462.9978; found: 462.9981.

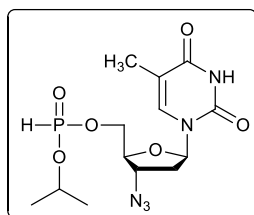

**((2S,3S,5R)-3-azido-5-(5-methyl-2,4-dioxo-3,4-dihydropyrimidin-1(2H)-yl)tetrahydrofuran-2-yl)methyl isopropyl phosphonate (O)<sup>[10],[11]</sup>:**

<sup>1</sup>H NMR (600 MHz, CDCl<sub>3</sub>): δ 8.48 (br.s, 1H), 7.42, 7.37\*(s, 1H), 6.94, 6.92\*(d, *J* = 702.6 Hz, 1H, P-H), 6.22-6.19 (m, 1H), 4.83-4.79 (m, 1H), 4.37-4.26 (m, 2H), 4.06-4.03 (m, 1H), 2.48-2.44 (m, 1H), 2.37-2.33 (m, 1H), 1.95 (s, 3H), 1.40-1.38 (m, 6H); <sup>13</sup>C NMR (150 MHz, CDCl<sub>3</sub>): δ 163.3, 149.9, 135.3, 135.2\*, 111.6, 111.5\*, 84.9, 82.2, 82.1\*, 72.3 (*J* = 5.8 Hz), 63.9\* (*J* = 5.4 Hz), 59.98, 59.95\*, 37.45, 37.42\*, 24.06 (*J* = 3.9 Hz), 23.80, 23.76\*, 12.50, 12.47\*; <sup>31</sup>P NMR (400 MHz, CDCl<sub>3</sub>): δ 7.55, 6.95\*; HRMS (ESI, *m/z*) calcd. for C<sub>13</sub>H<sub>20</sub>N<sub>5</sub>NaO<sub>6</sub>P [M + Na]<sup>+</sup>: 396.1049; found: 390.1046.

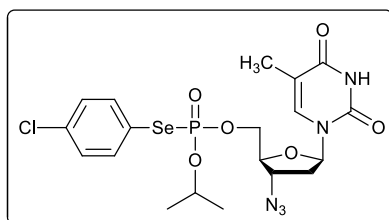

**O-(((2S,3S,5R)-3-azido-5-(5-methyl-2,4-dioxo-3,4-dihydropyrimidin-1(2H)-yl)tetrahydrofuran-2-yl)methyl) Se-(4-chlorophenyl) O-isopropyl phosphoroselenoate (P):**

The reaction is conducted for 36 hours by using **O** (Scheme 4) with bis(4-chlorophenyl) diselenide and afforded the desired product as a gummy liquid.

<sup>1</sup>H NMR (400 MHz, CDCl<sub>3</sub>): δ 9.59 (br.s, 1H), 7.56-7.53 (m, 2H), 7.29-7.24 (m, 3H), 6.21 (t, *J* = 6.4 Hz, 1H), 6.16\*(t, *J* = 6.4, 1H), 4.89-4.79 (m, 1H), 4.37-4.12 (m, 3H), 3.98-3.96 (m, 1H), 2.41-2.35 (m, 1H), 2.26-2.16 (m, 1H), 1.83, 1.79\*(s, 3H), 1.36-1.33 (m, 3H), 1.29-1.27 (m, 3H); <sup>13</sup>C NMR (100 MHz, CDCl<sub>3</sub>): δ 164.1, 150.42, 150.37\*, 137.0 (dd, *J* = 7.6 Hz, 4.7 Hz), 136.0-135.9 (m), 135.36, 135.33\*, 129.9 (dd, *J* = 4.3 Hz, 1.6 Hz), 121.2 (*J* = 9.2 Hz), 111.6, 84.9, 84.7\*, 82.2-82.0 (m), 74.8-74.7 (m), 66.0-65.9 (m), 60.1, 59.9\*, 37.6, 24.04, 24.01\*, 23.6, 23.5\*, 12.6, 12.5\*; <sup>31</sup>P NMR (400 MHz, CDCl<sub>3</sub>): δ 17.25, 17.17; HRMS (ESI, *m/z*) calcd. for C<sub>19</sub>H<sub>24</sub>ClN<sub>5</sub>O<sub>6</sub>PSe [M + H]<sup>+</sup>: 564.0318; found: 564.0312.

\*a pair of diastereoisomers: different chemical shifts assigned to the same centre.

## Reference:

- [1] S. Saba, J. Rafique, M. S. Franco, A. R. Schneider, L. Espíndola, D. O. Silva, A. L. Braga, *Org. Biomol. Chem.*, **2018**, *16*, 880-885.
- [2] T. M. Ha, B. Yao, Q. Wang, J. Zhu, *Org. Lett.*, **2015**, *17*, 1750-1753.
- [3] Q-B. Zhang, Y-L. Ban, P-F. Yuan, S-J. Peng, J-G. Fang, L-Z. Wu, Q. Liu, *Green Chem.*, **2017**, *19*, 5559.
- [4] D. Luo, G. Wu, H. Yang, M. Liu, W. Gao, X. Huang, J. Chen, H. Wu, *J. Org. Chem.*, **2016**, *81*, 4485-4493.
- [5] H-A. Du, R-Y. Tang, C-L. Deng, Y Liu, J-H Li, X-G. Zhang, *Adv. Synth. Catal*, **2011**, *353*, 2739-2748.
- [6] Q. Xu, C-G. Liang, X. Huang, *Synthetic Communications*, **2003**, *33*, 2777-2785.
- [7] S. Mitra, S. Mukherjee, S. K. Sen, A. Hajra, *Bioorg. Med. Chem. Lett.* **2014**, *24*, 2198-2201.
- [8] E. G. Kataev, T. G. Mannafov, *Zh. Obshh. Khim. J. Allg. Chem.*. 1966, **36**, 254, (CA 1966, 64, 15784).
- [9] C. Huo, C. Wang, M. Wu, X. Jia, X. Wang, Y. Yuan, H. Xie, *Org. Biomol. Chem.*, **2014**, *12*, 3123
- [10] C-X. Lin, H Fu, G-Z. Tu and Y-F. Zhao, *Chin. J. Chem.*, **2004**, *22*, 225-227.
- [11] Q. Xiao, J. Sun, Y. Jua, Y-F Zhao and Y-X. Cui, *J. Chem. Research (S)*, **2003**, 262-263.

**Spectral Data:**



JD-DD-PD696-1H-1H  
 JD-DD-PD696-1H-(N) 400

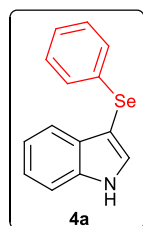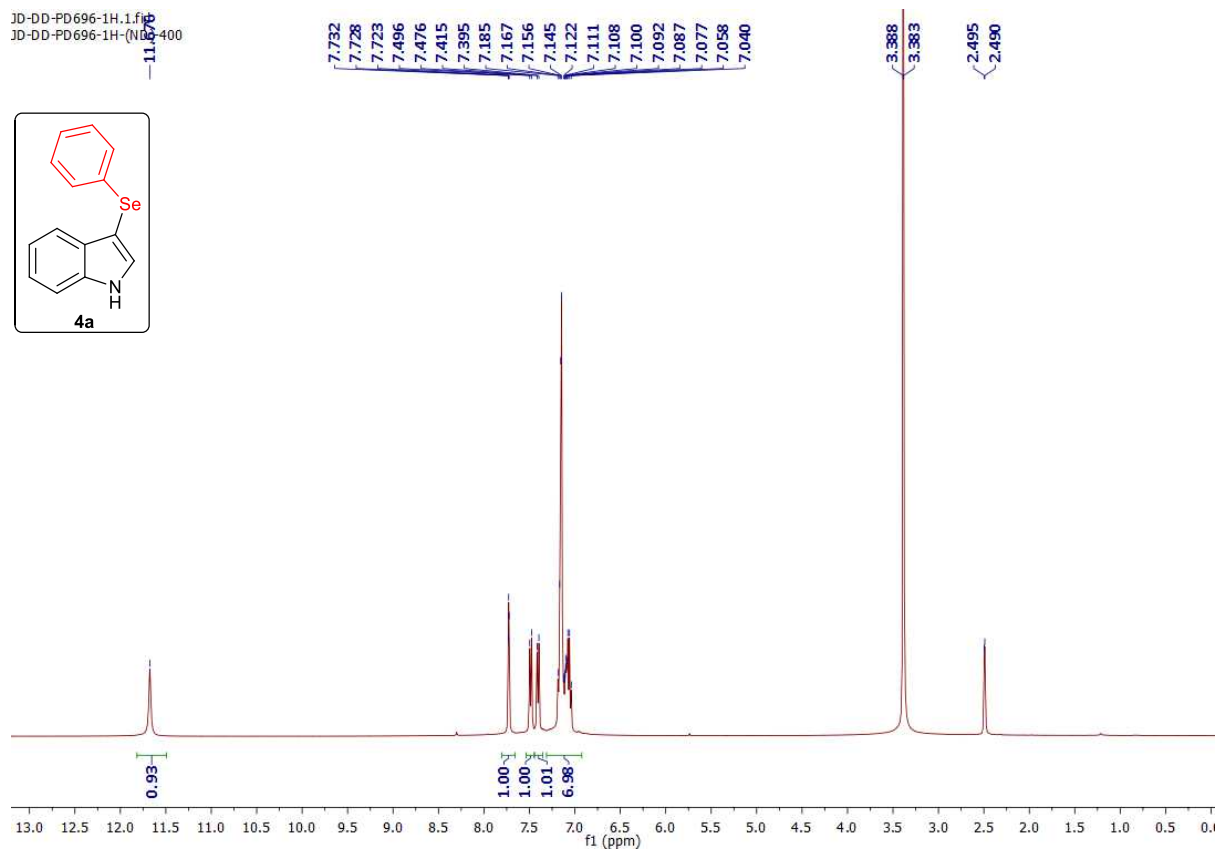

PD-717  
 PD-717-1H

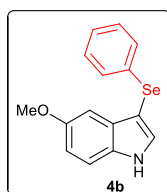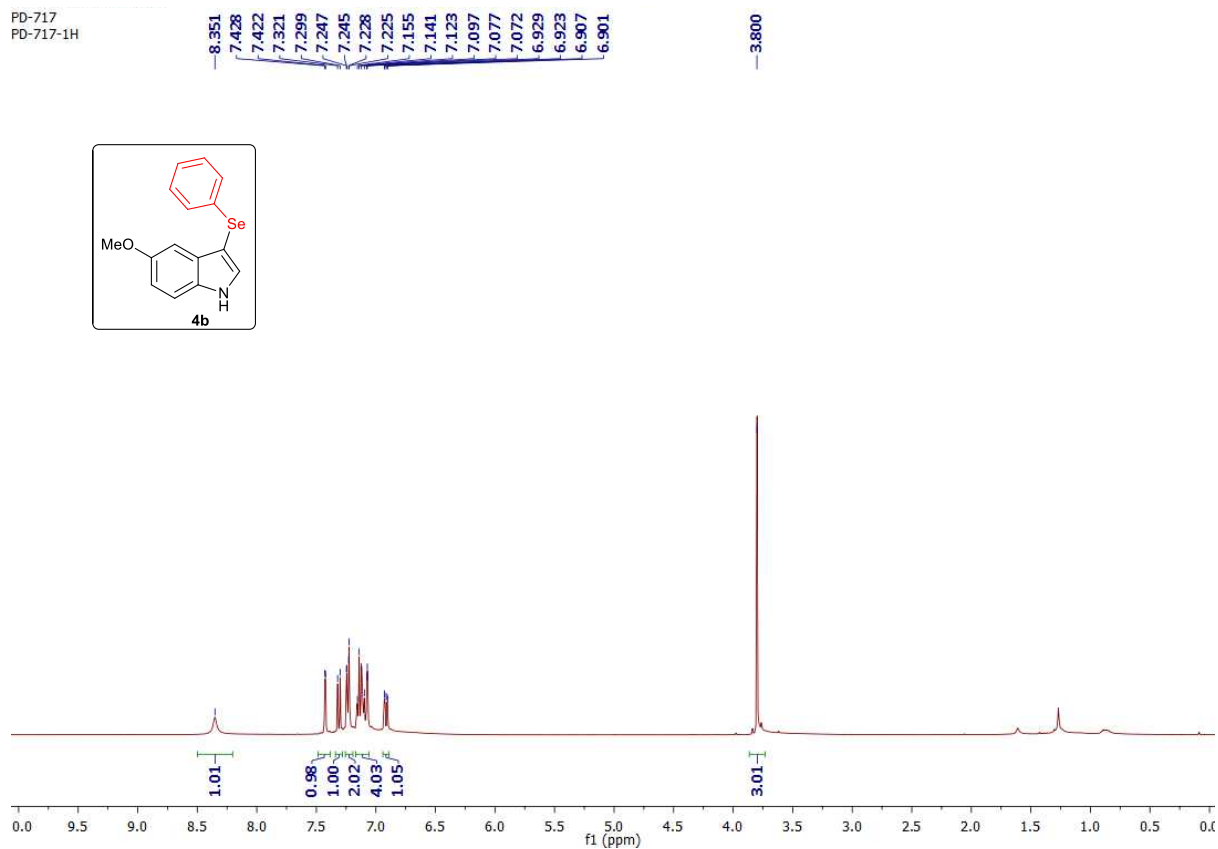

PD-717 1  
PD-717-13C

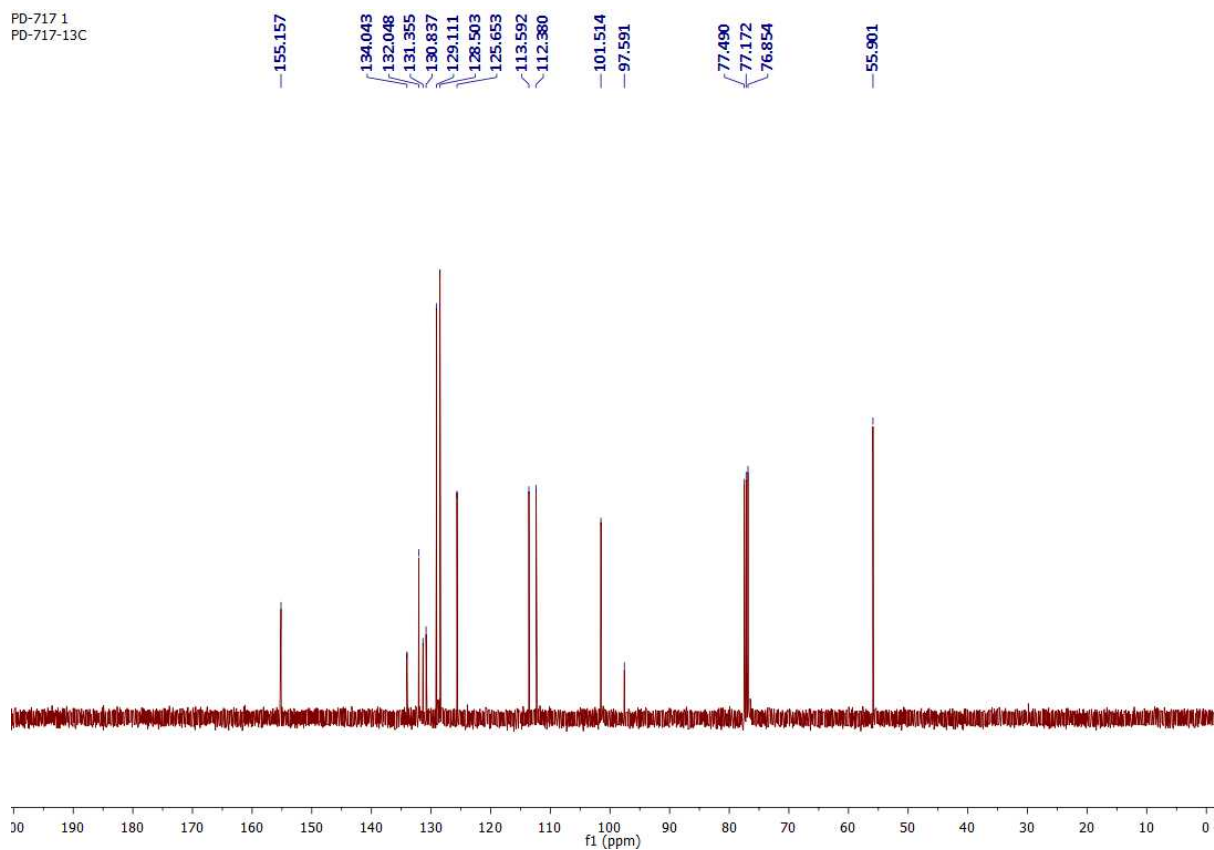

PD-1166  
PD-1166-1H

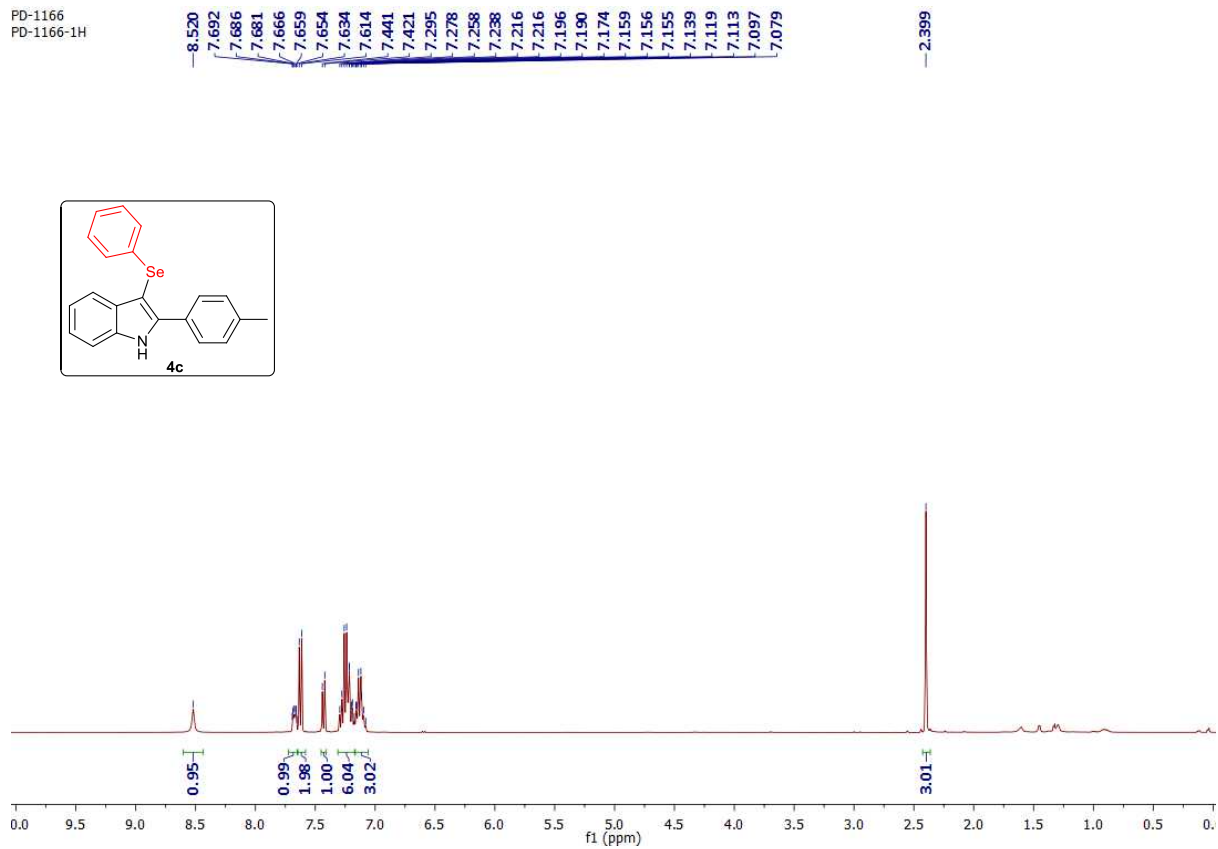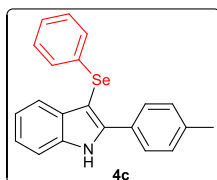

PD-1166  
PD-1166-13C

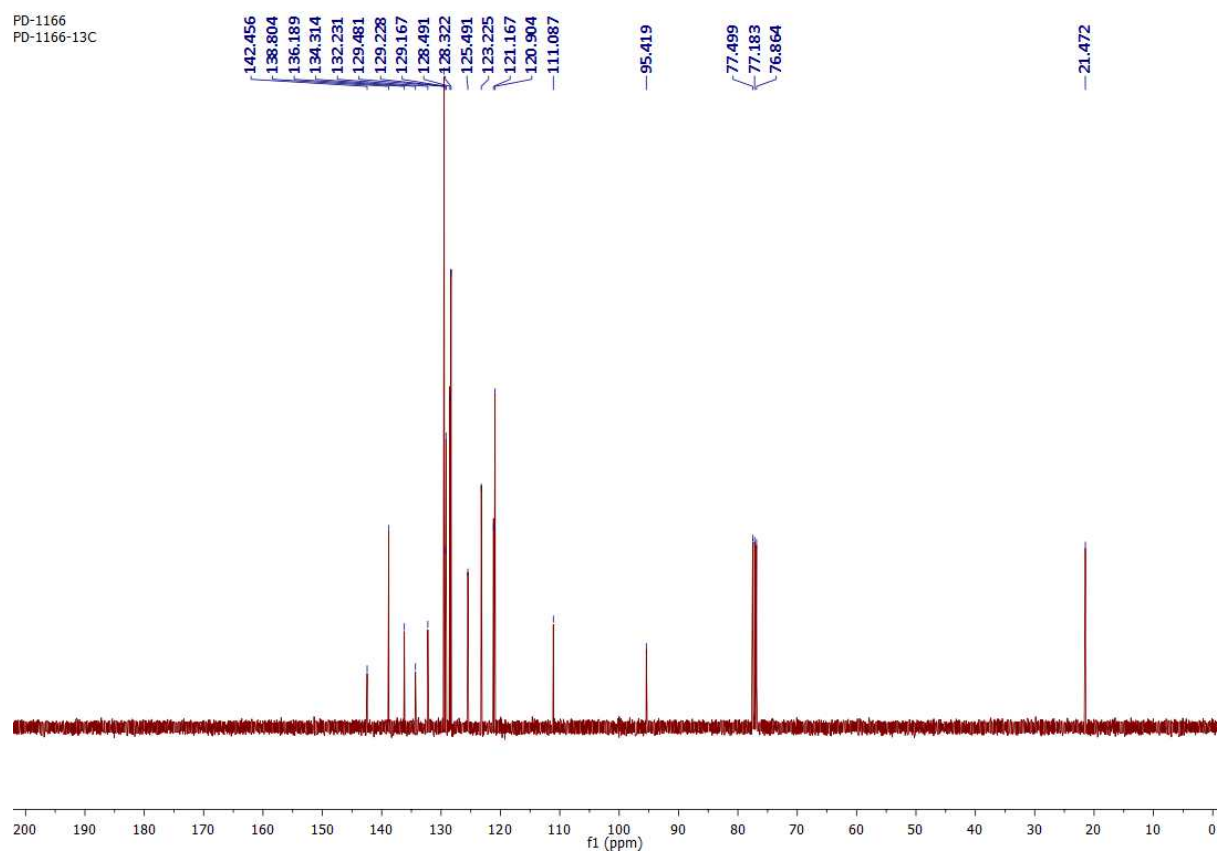

DP-782-1H/1

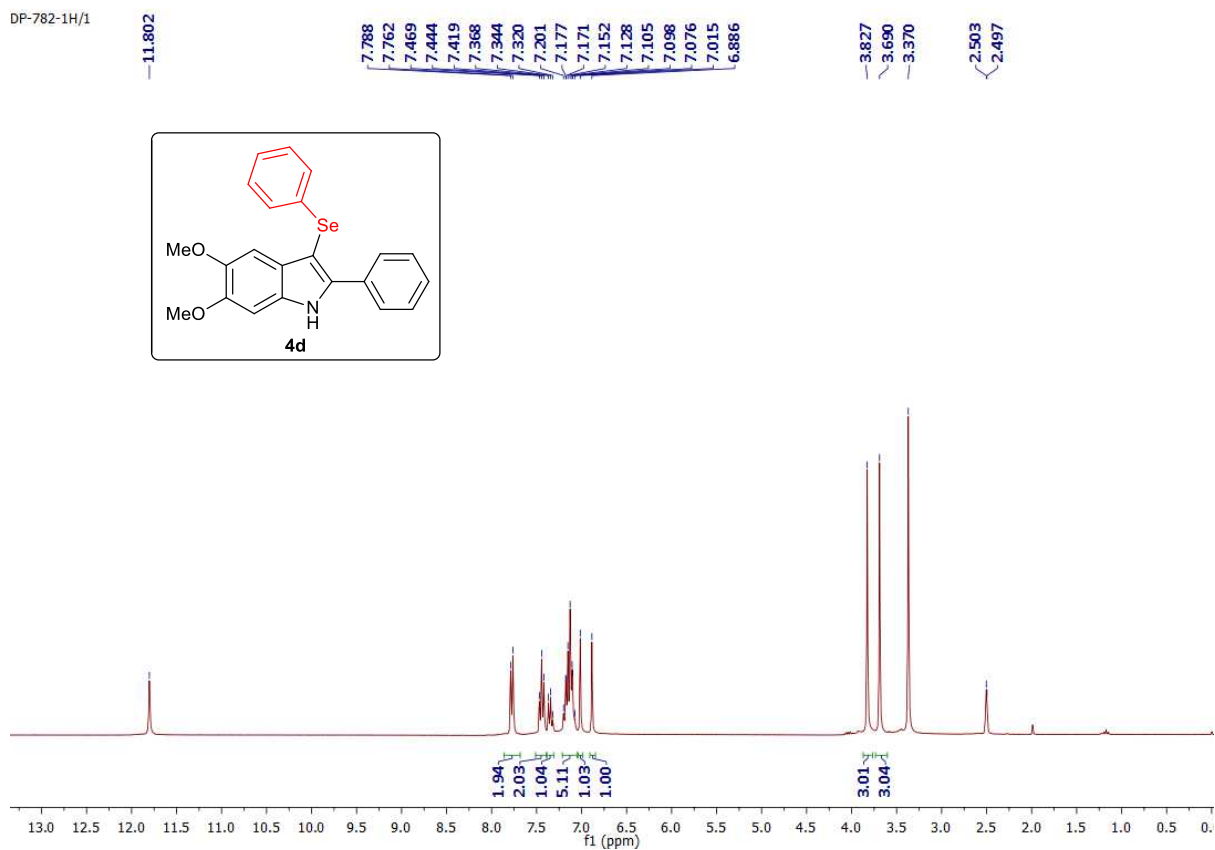

PD-782-C/1

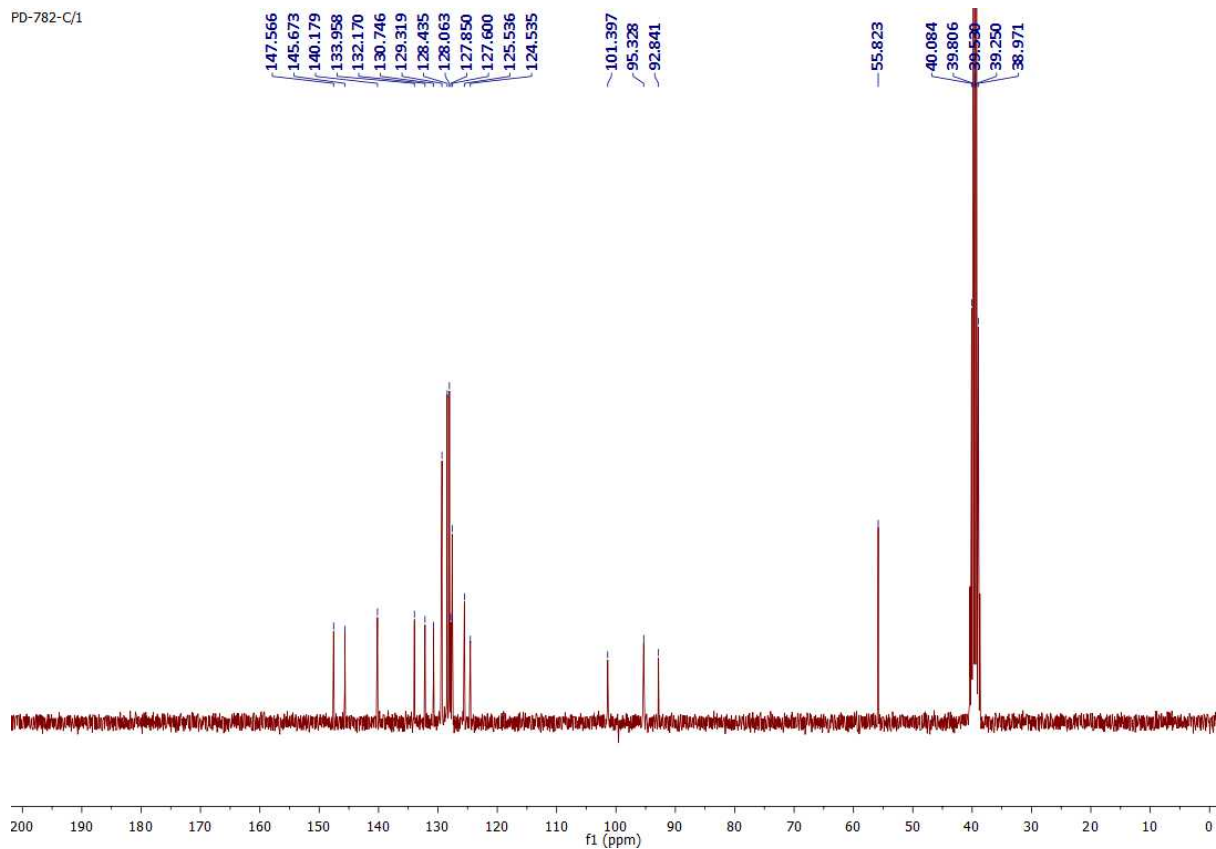

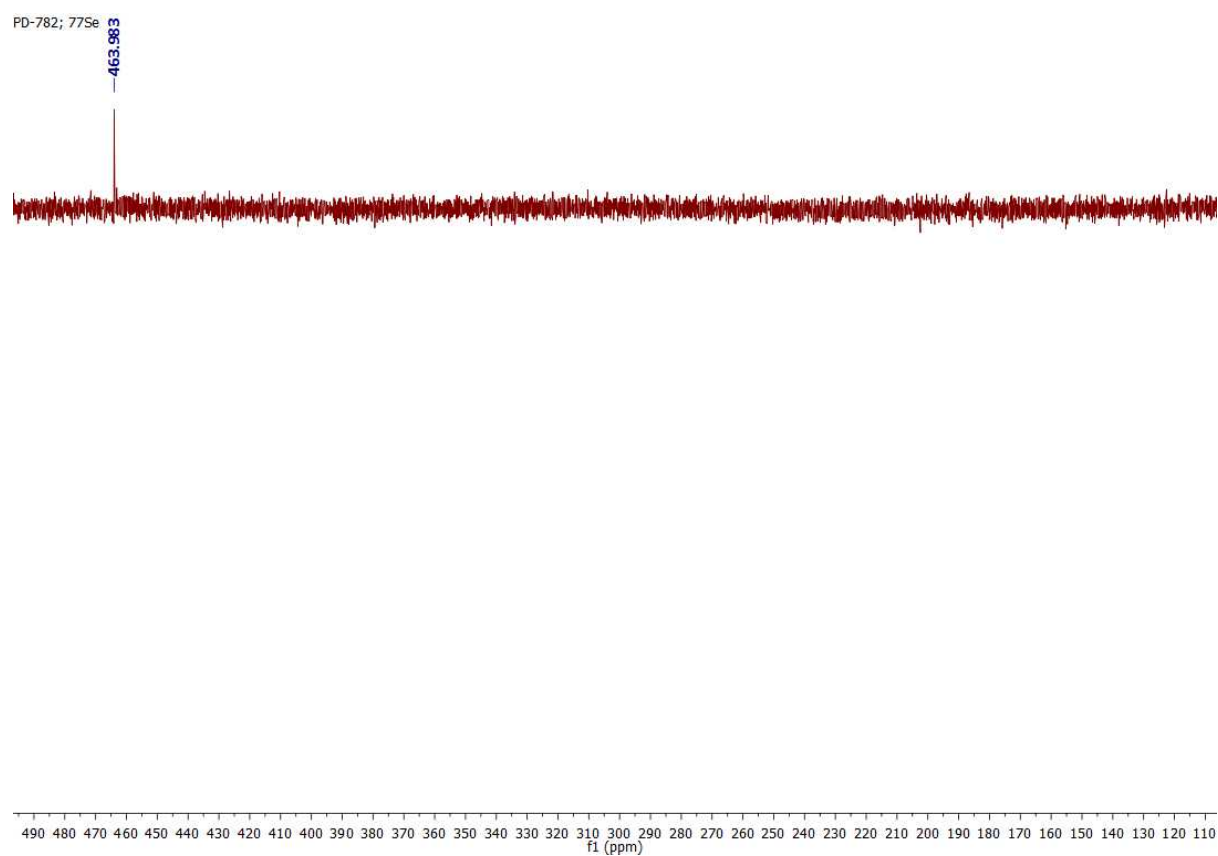

pd-1167fa  
single\_pulse

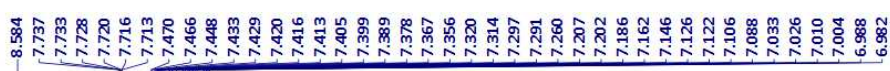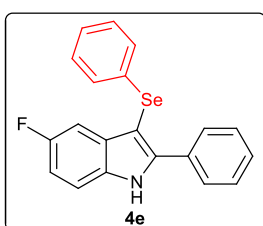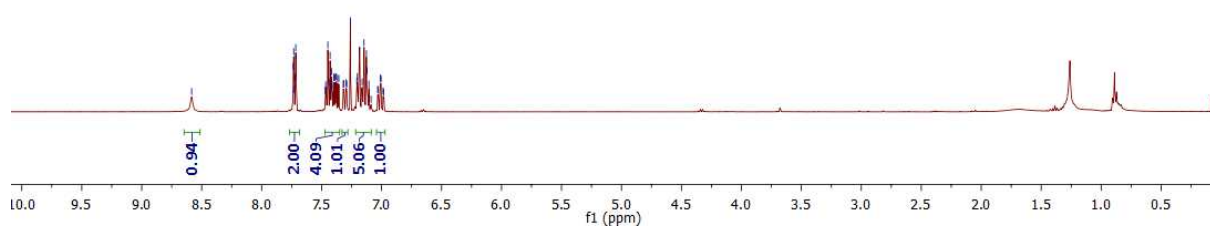

PD-1167F  
PD-1167-13C

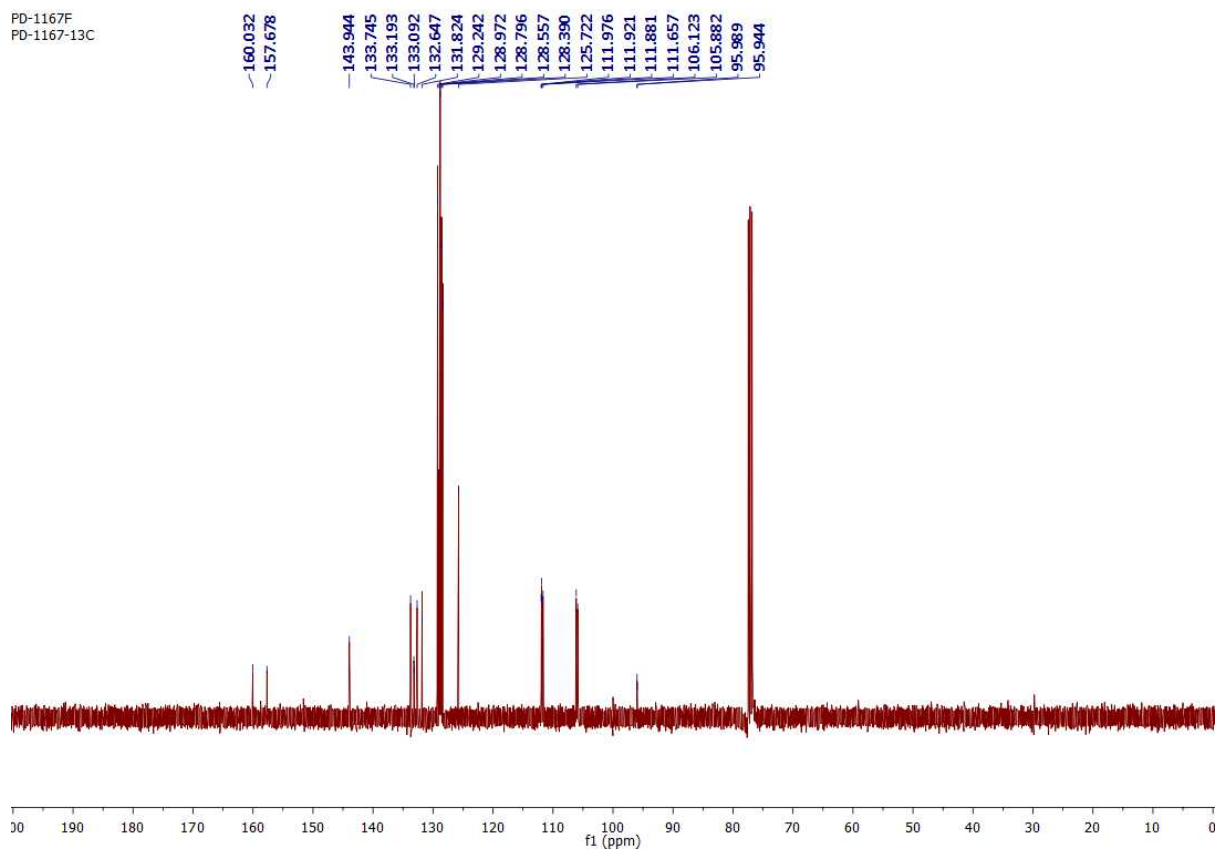

JD-DD-PD-746-1H.10.fid  
D-DD-PD-746-1H(SR) 4f

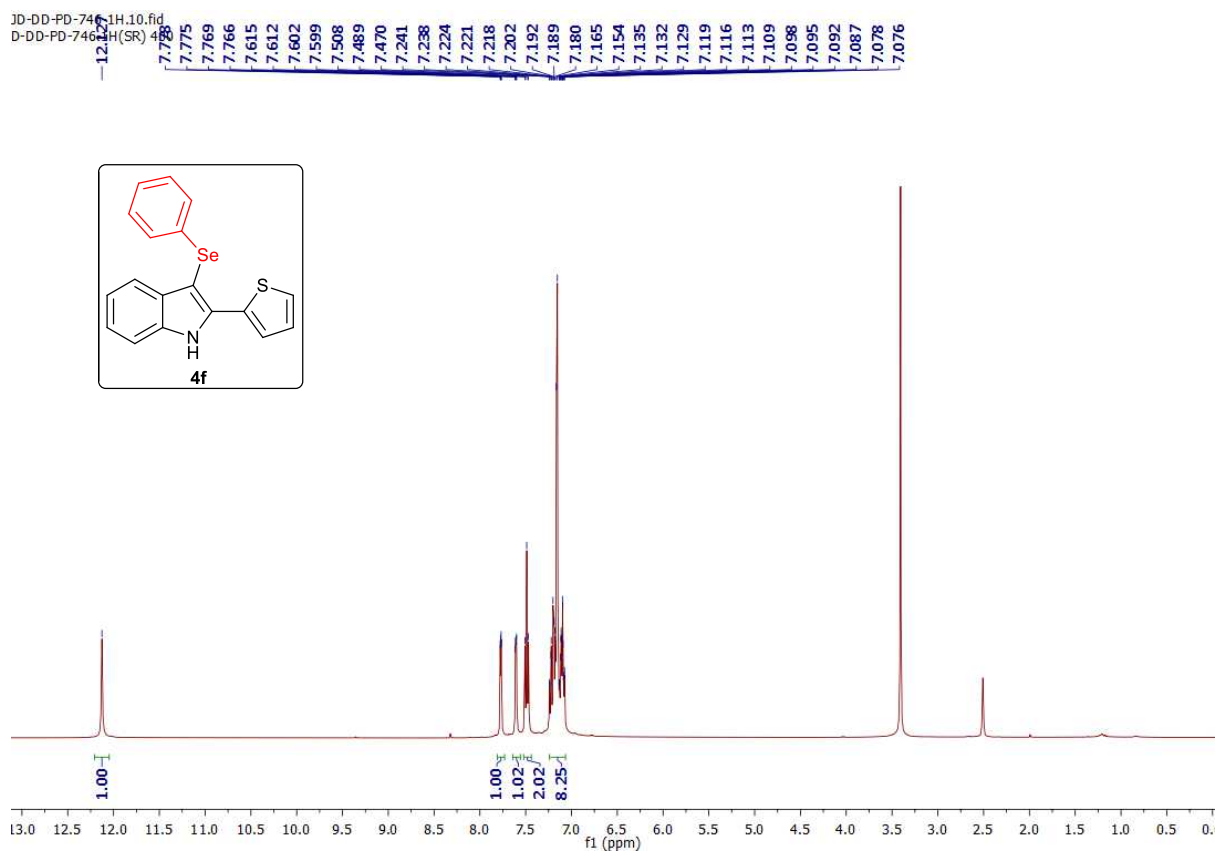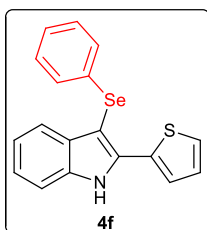

JD-DD-PD-746-13C.10.fid  
JD-DD-PD-746-13C(SR) 400

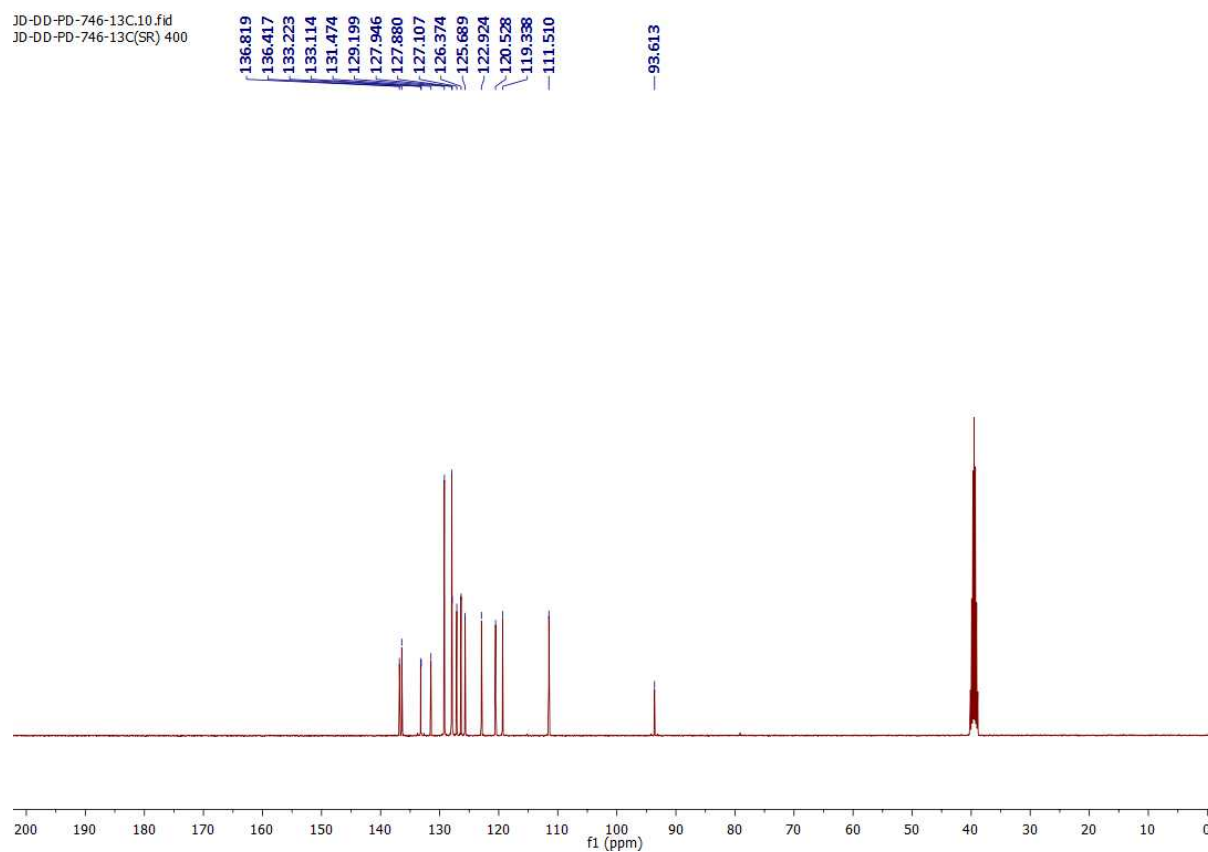

PD-746; 77Se NMR

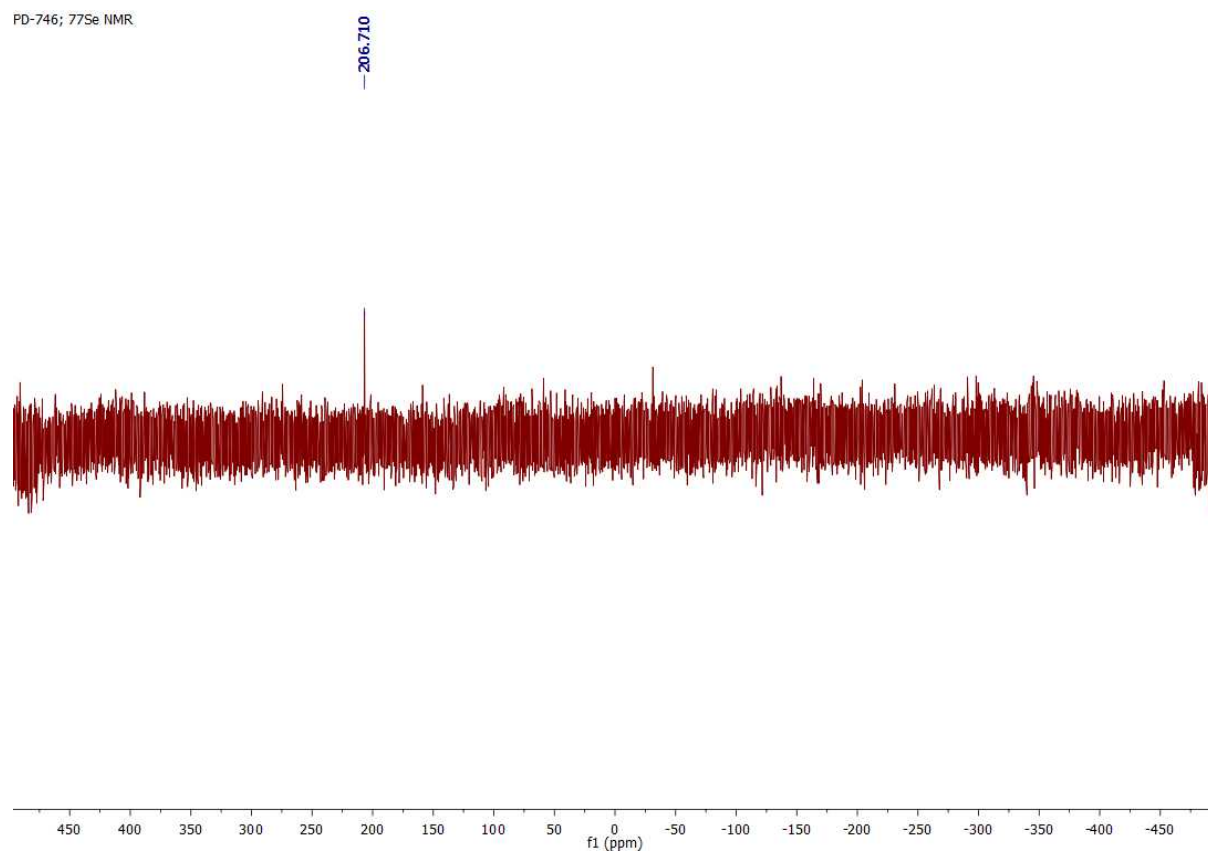

JD-DD-PD759-1H.1.fid  
JD-DD-PD759-1H (D) 400

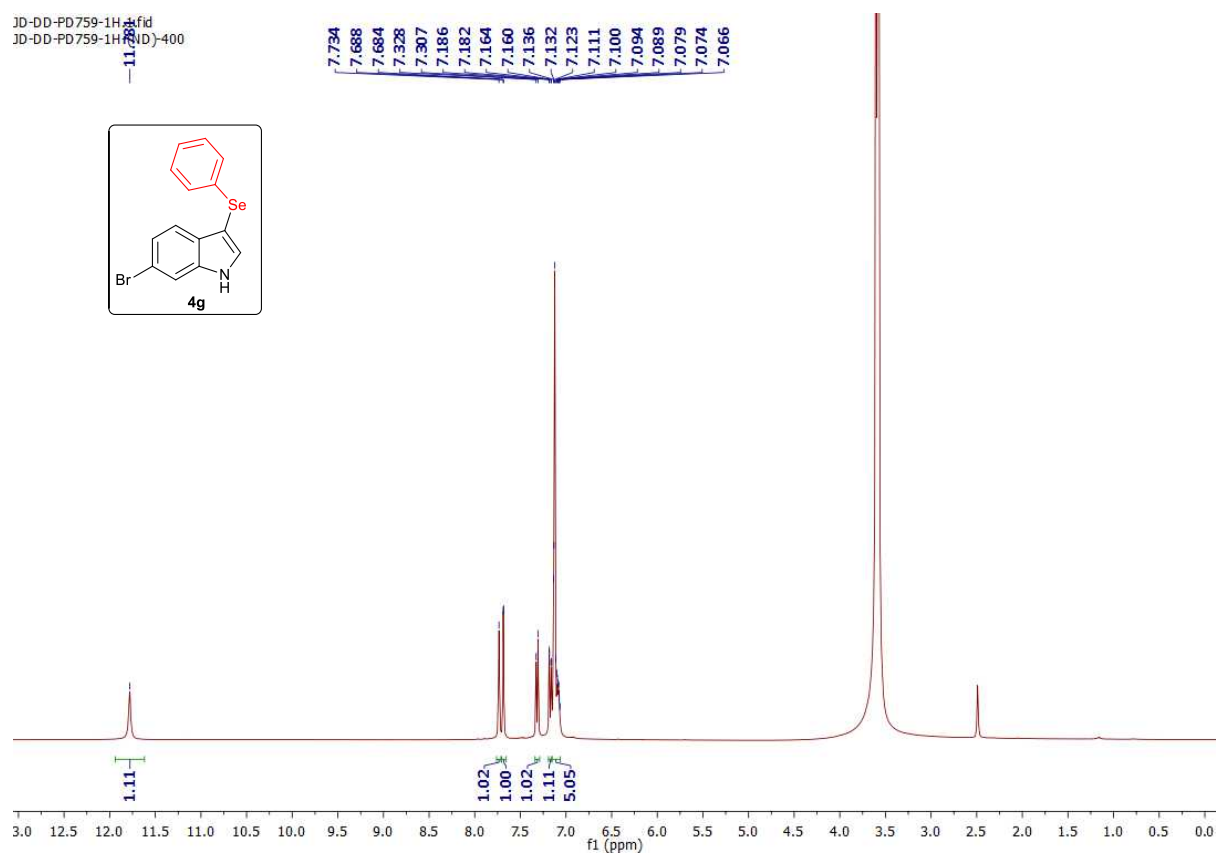

JD-DD-PD759-13C.10.fid  
JD-DD-PD759-13C(SR) 400

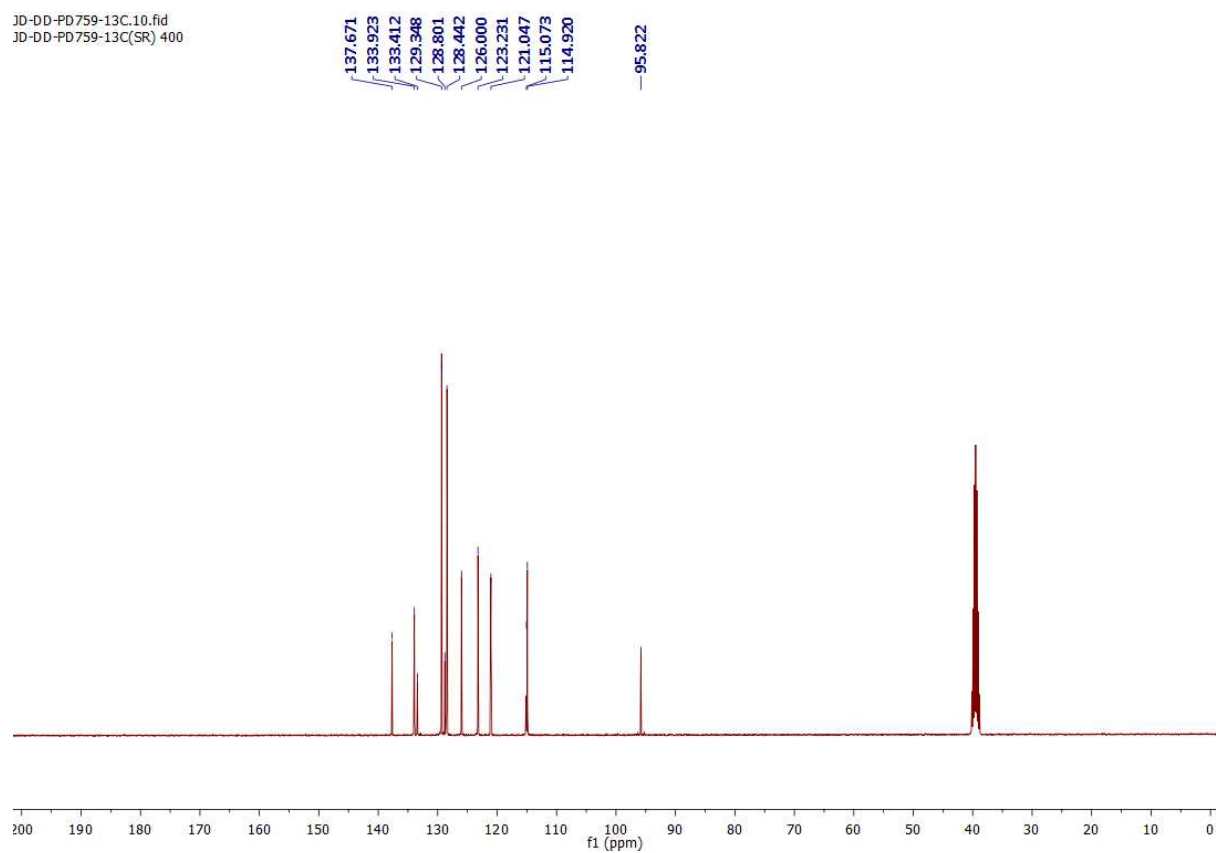



PD-779-1H/1

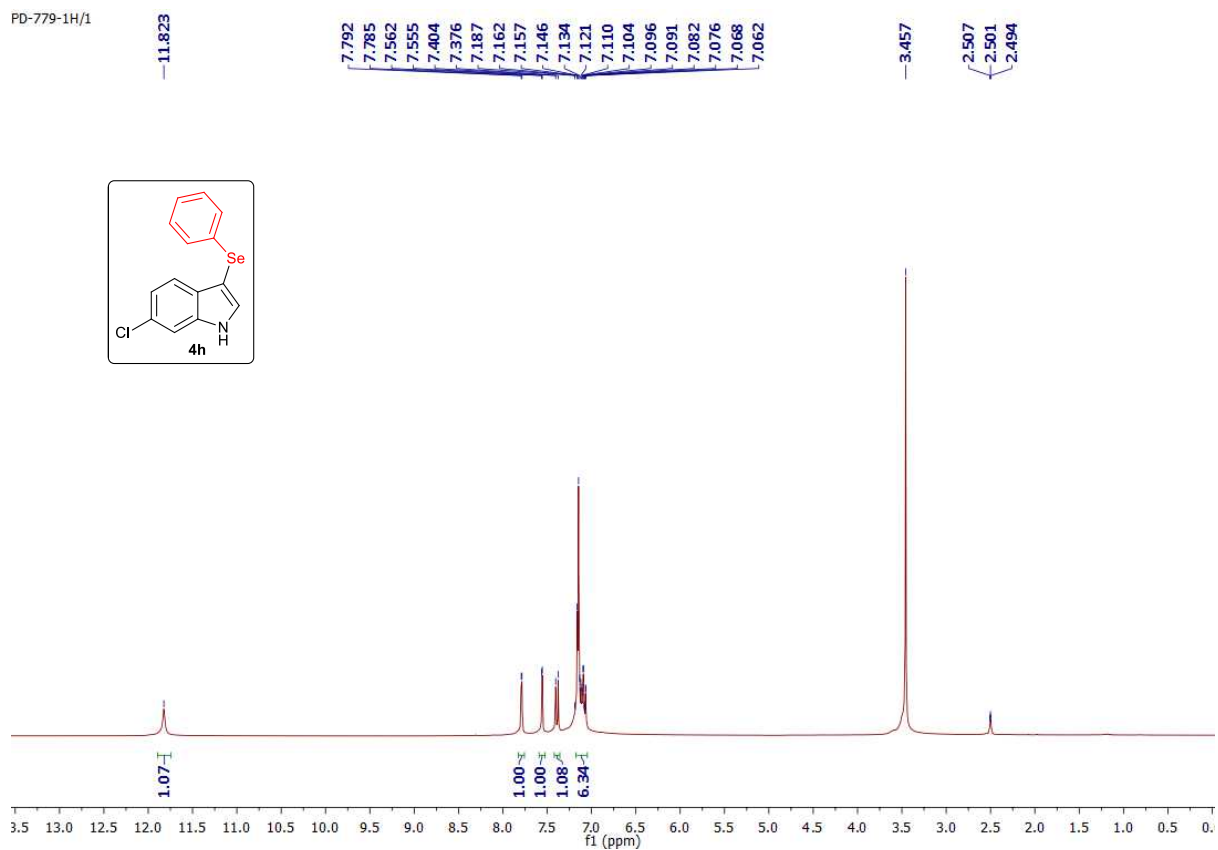

AA-Z779-C.1.fid

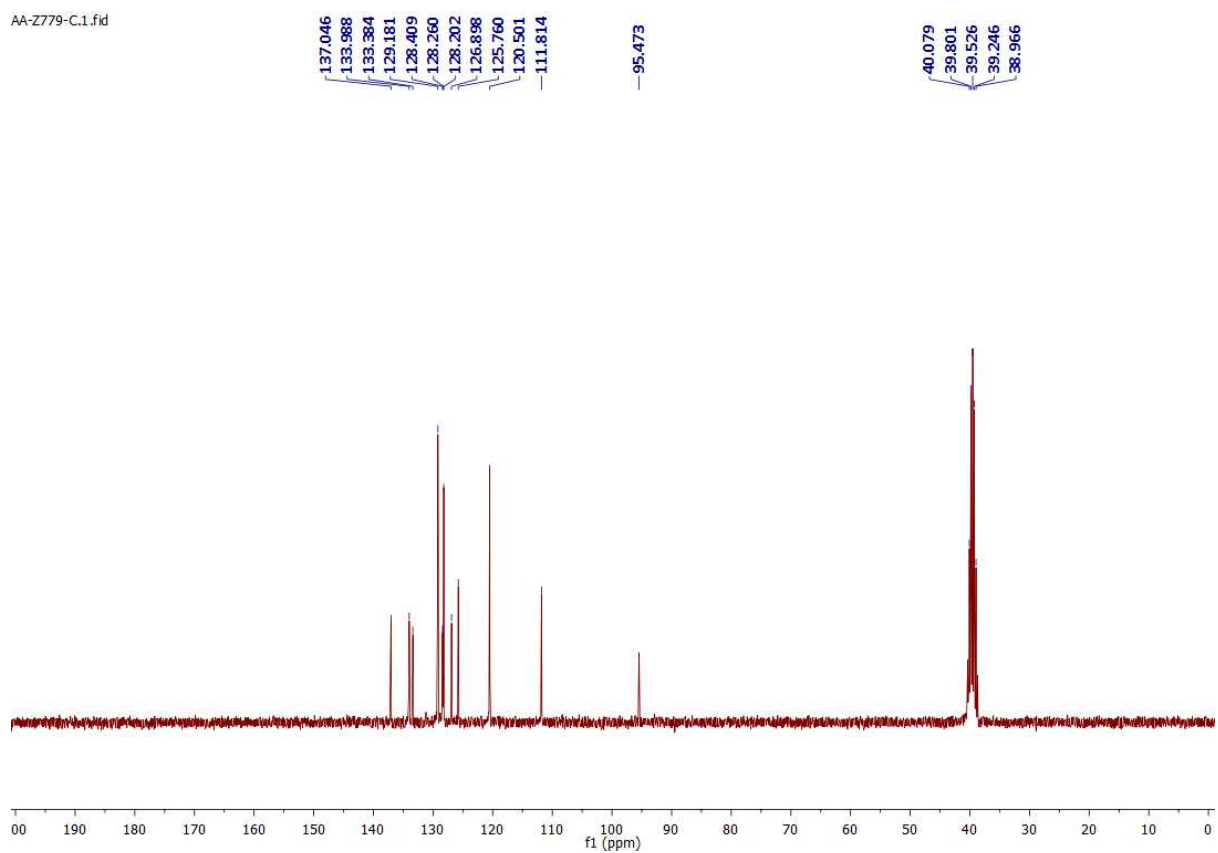

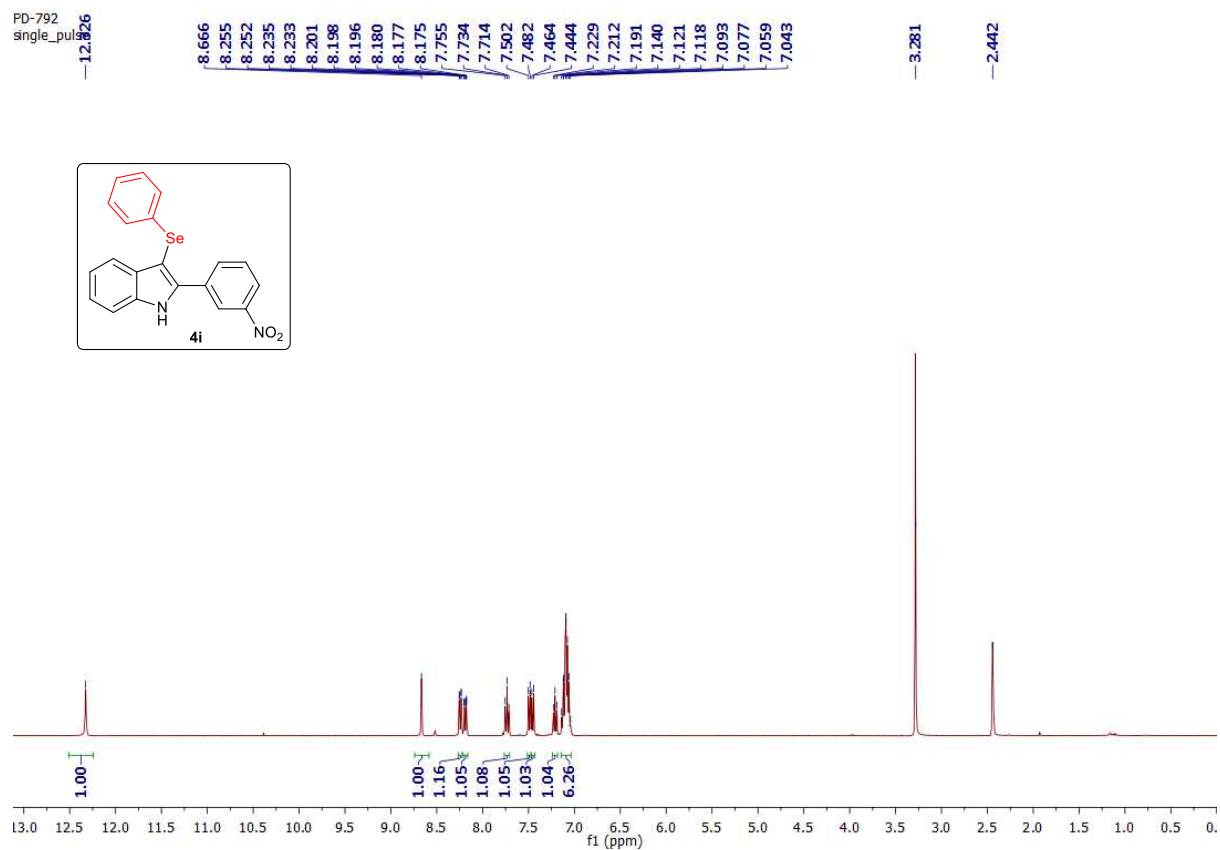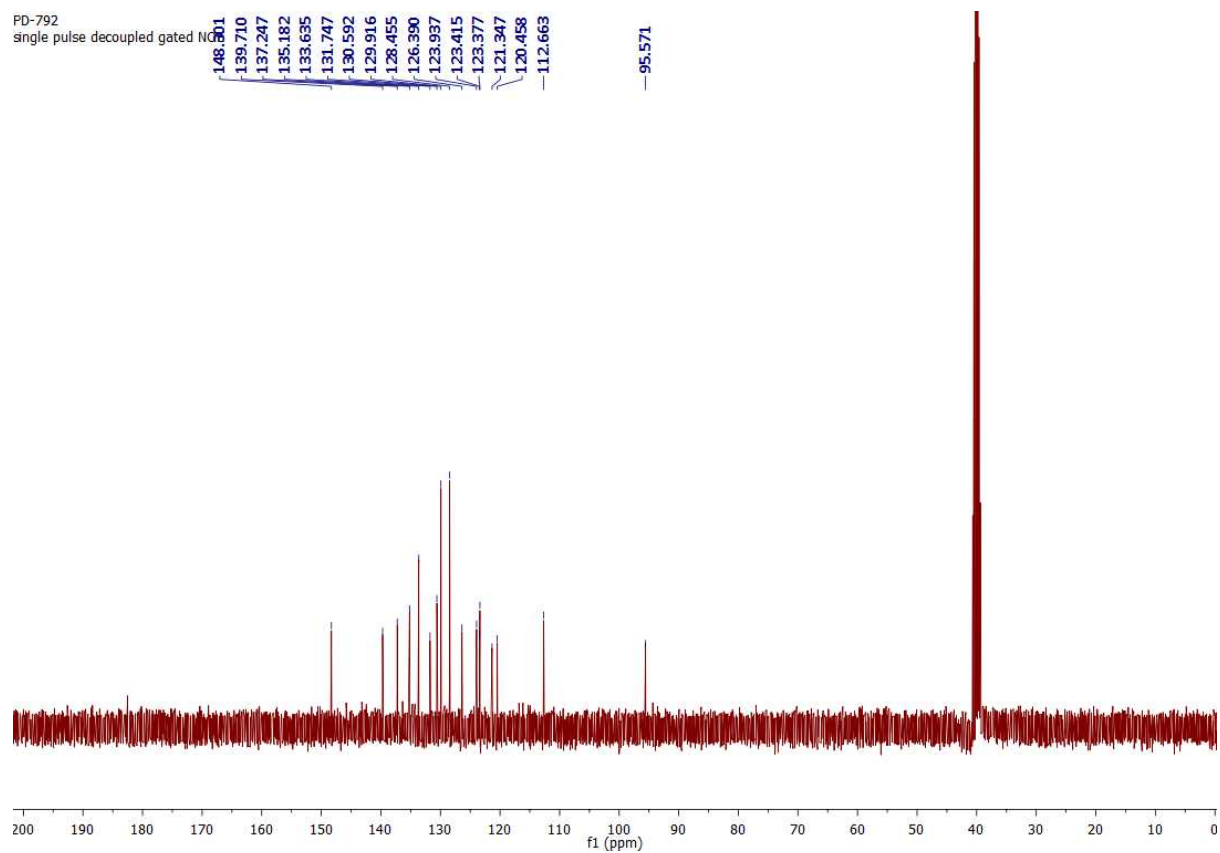

JD-DD-PD739-1H.1.fid  
JD-DD-PD739-1H-(ND)-400

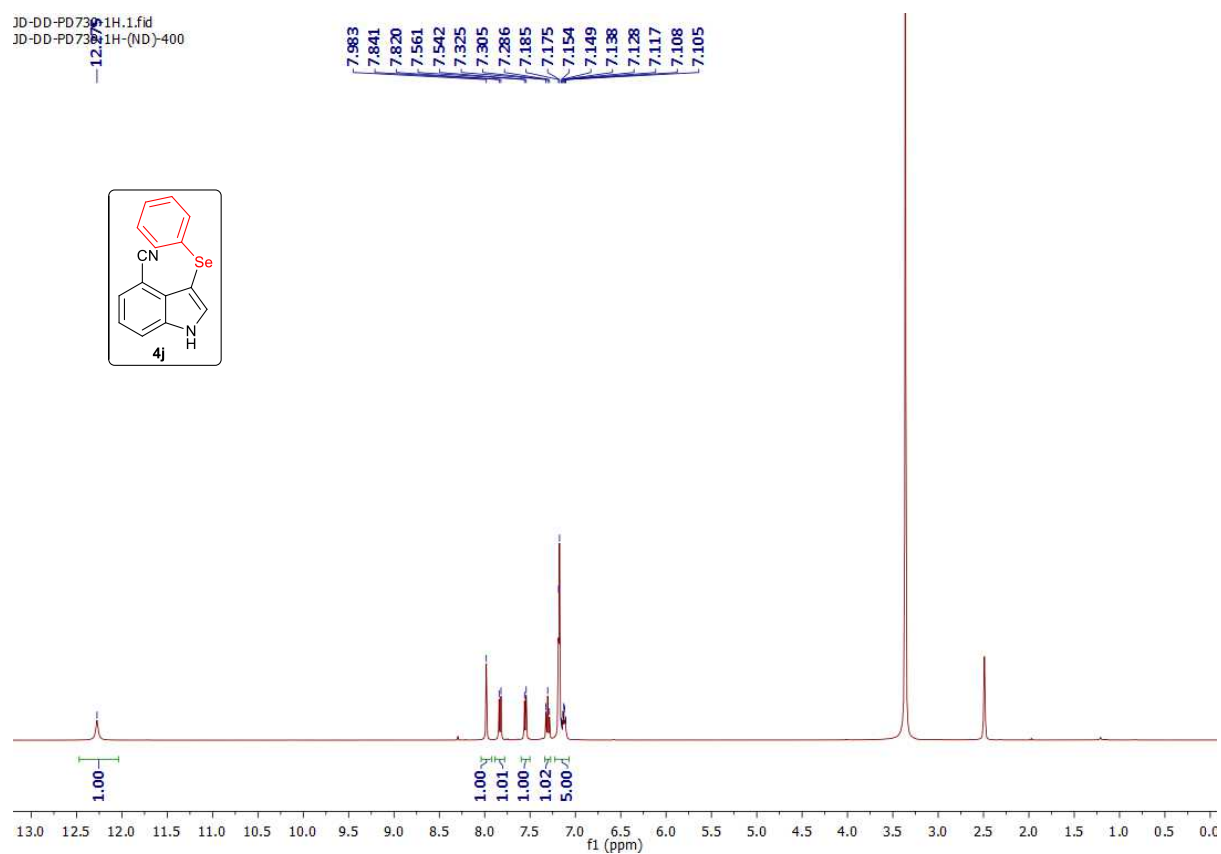

JD-DD-PD739-13C.10.fid  
JD-DD-PD739-13C(SR) 400

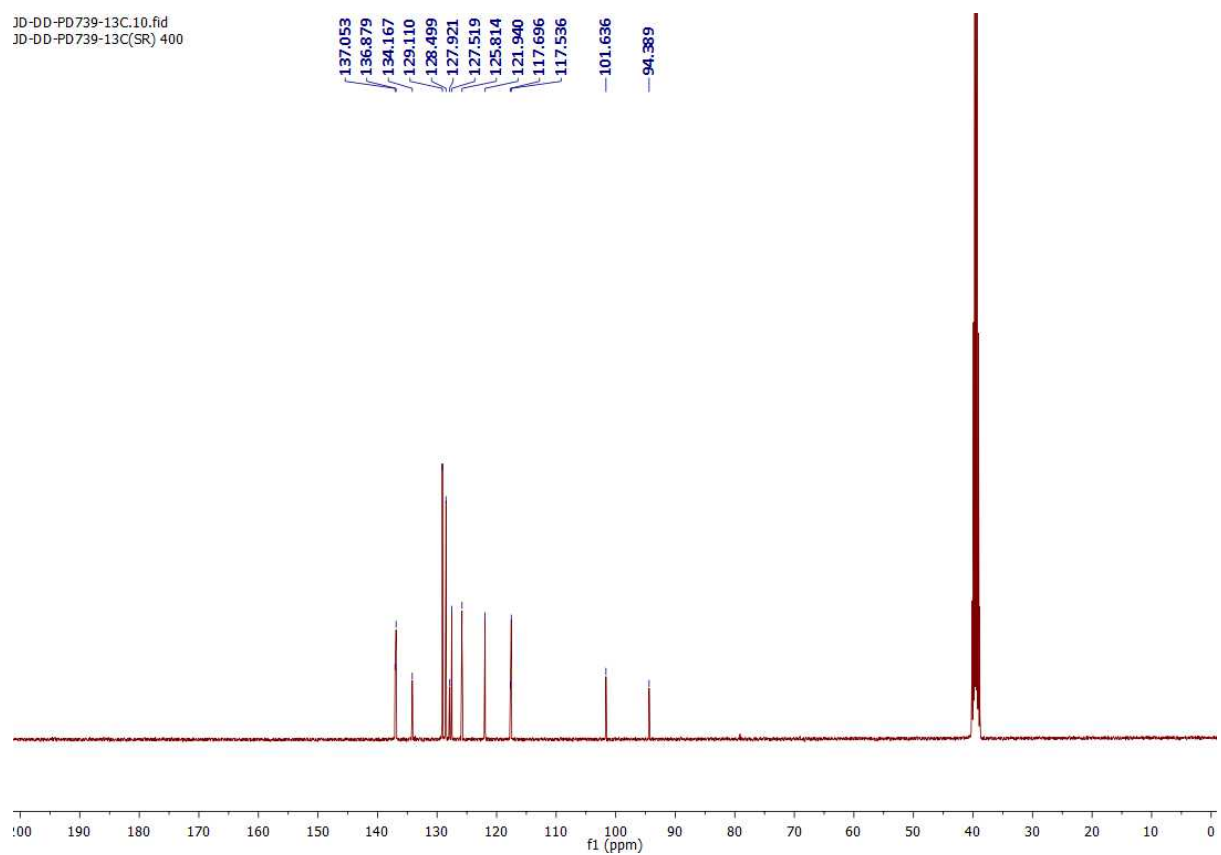

PD-1009  
PD-1009-1H

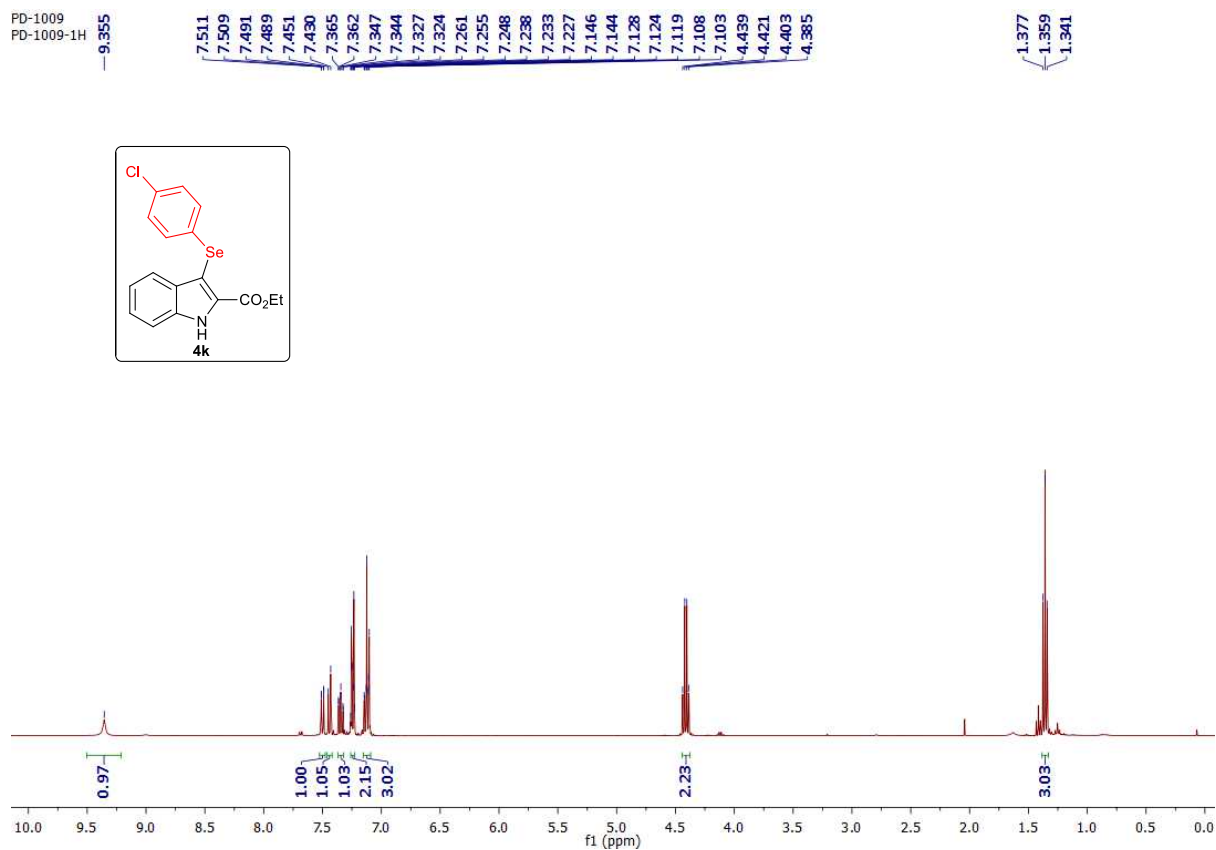

PD-1009  
PD-1009-13C

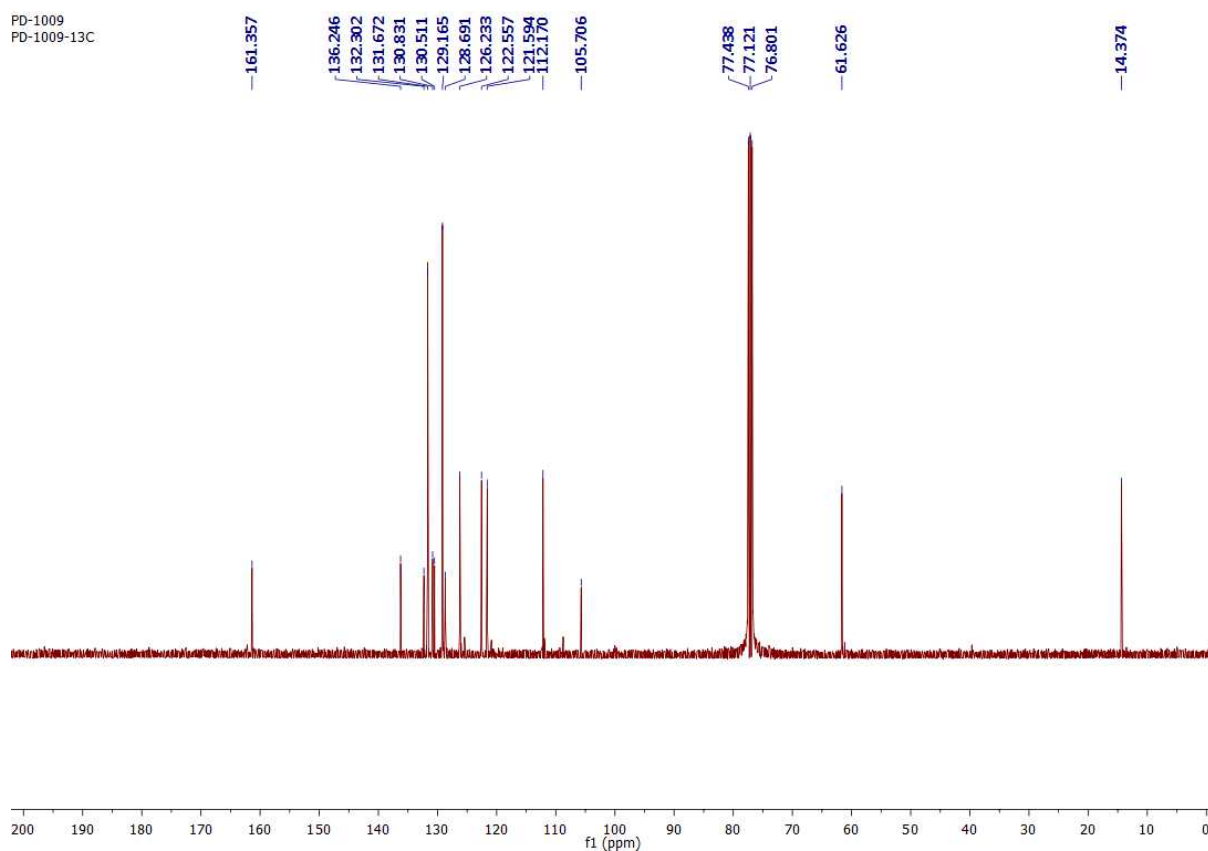

PD-1009; <sup>77</sup>Se NMR

—258.023

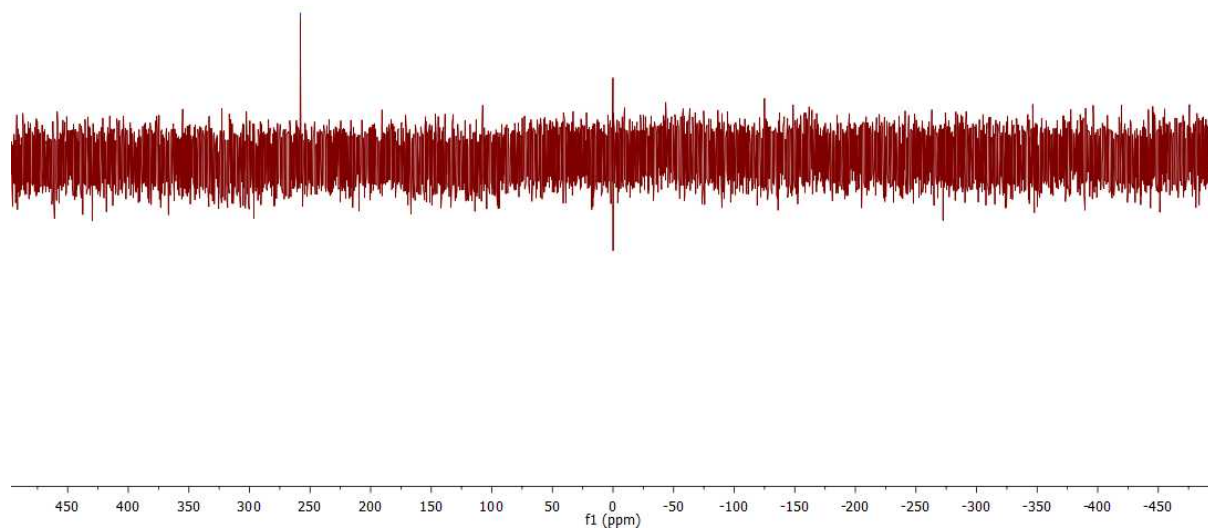

JD-DD-PD-780-1H.10.f01  
JD-DD-PD-780-1H(SR)

11.403

8.832 7.624 7.618 7.317 7.295 7.195 7.182 7.177 7.165 7.159 7.120 7.103 7.095 7.088 6.771 6.765 6.717 6.696 6.690

3.409 3.399

2.509

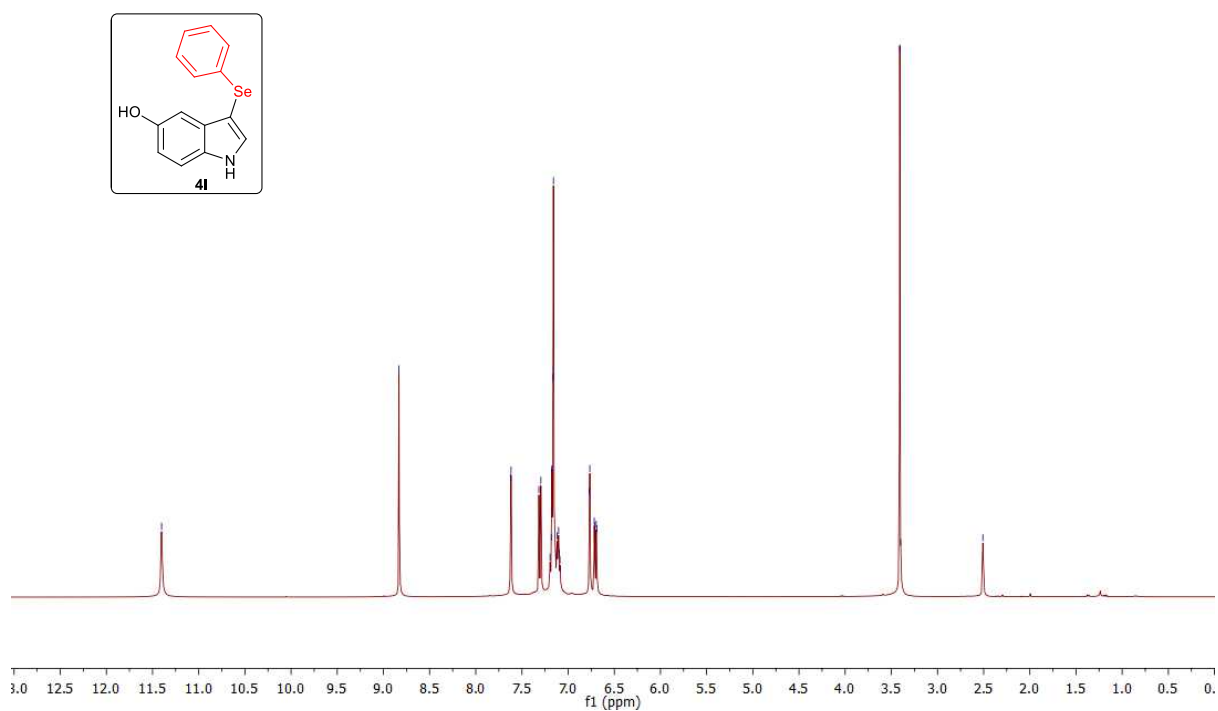

JD-DD-PD-780-13C.10.fid  
JD-DD-PD-780-13C(SR) 400

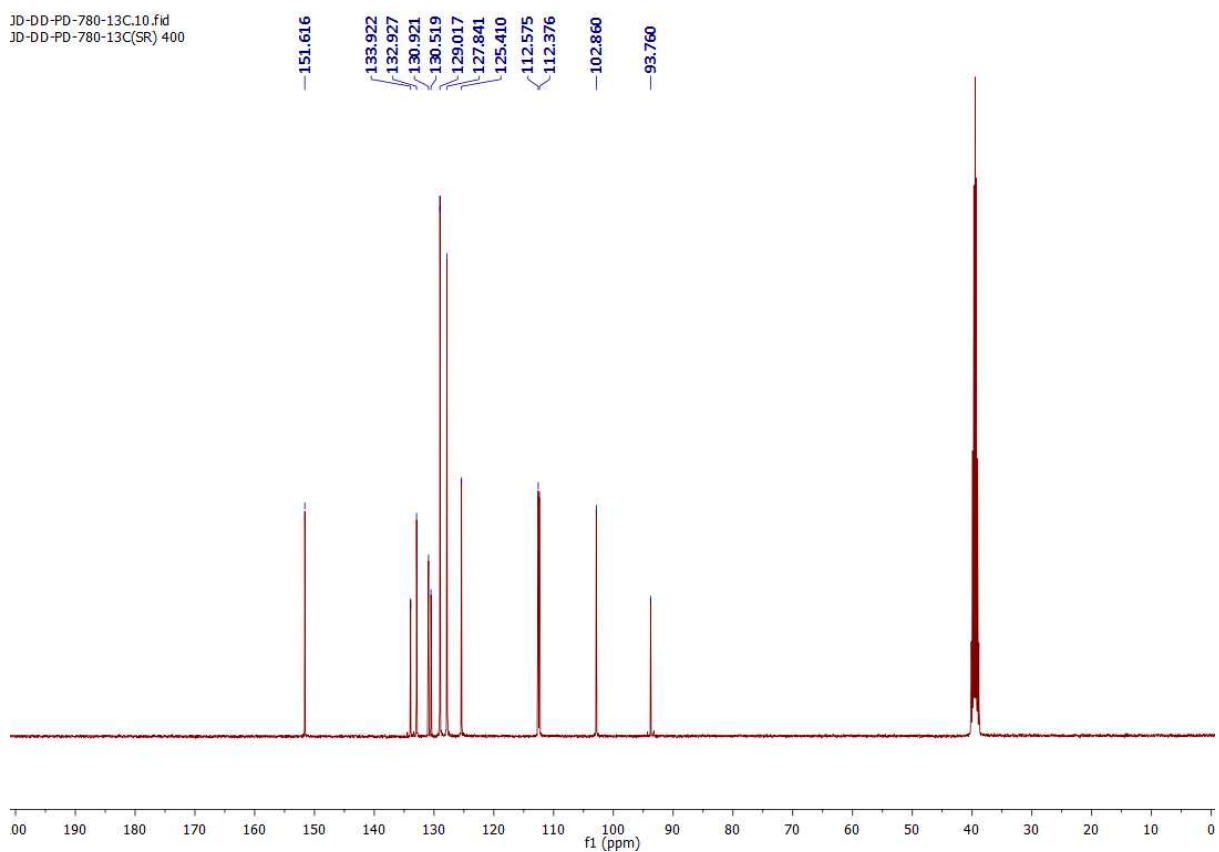

JD-DD-PD736-1H.1.fid  
JD-DD-PD736-1H-(ND)-400

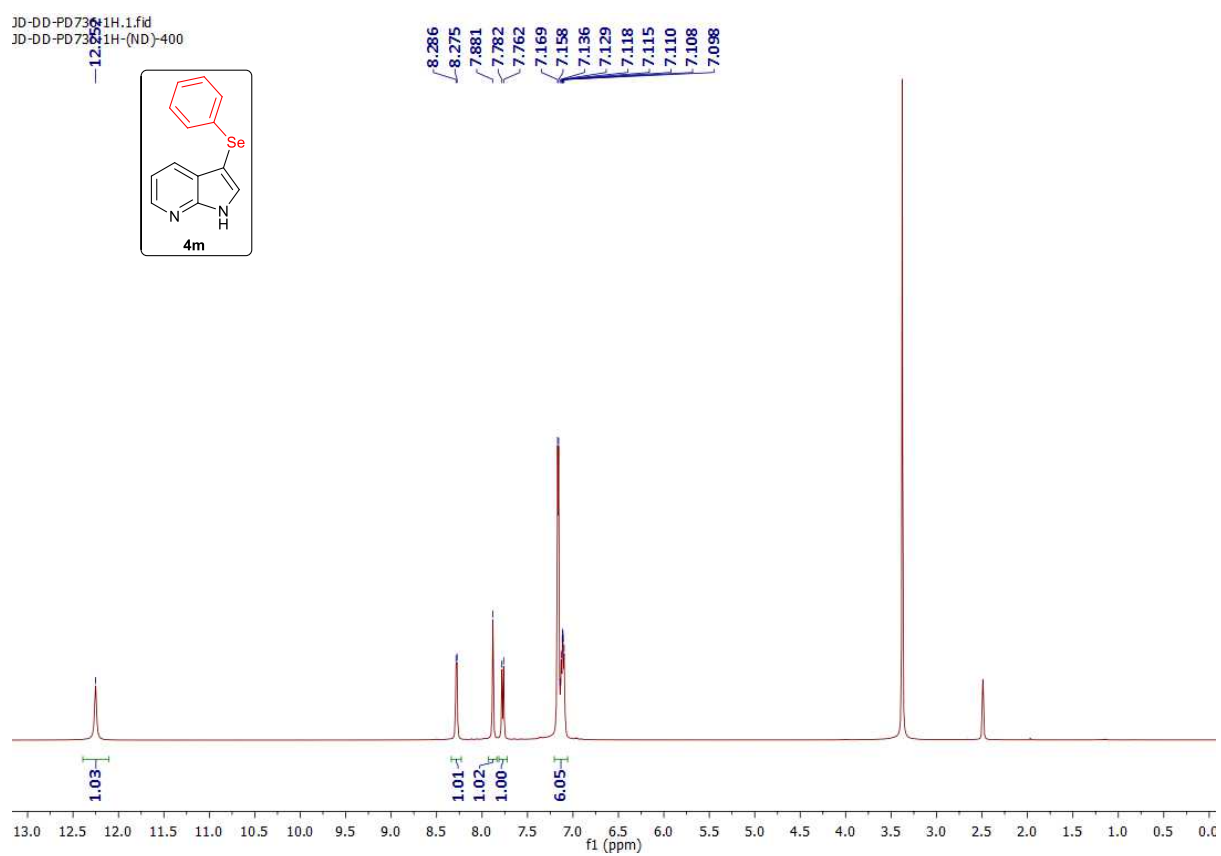

JD-DD-PD736-13C.10.fid  
JD-DD-PD736-13C(SR) 400

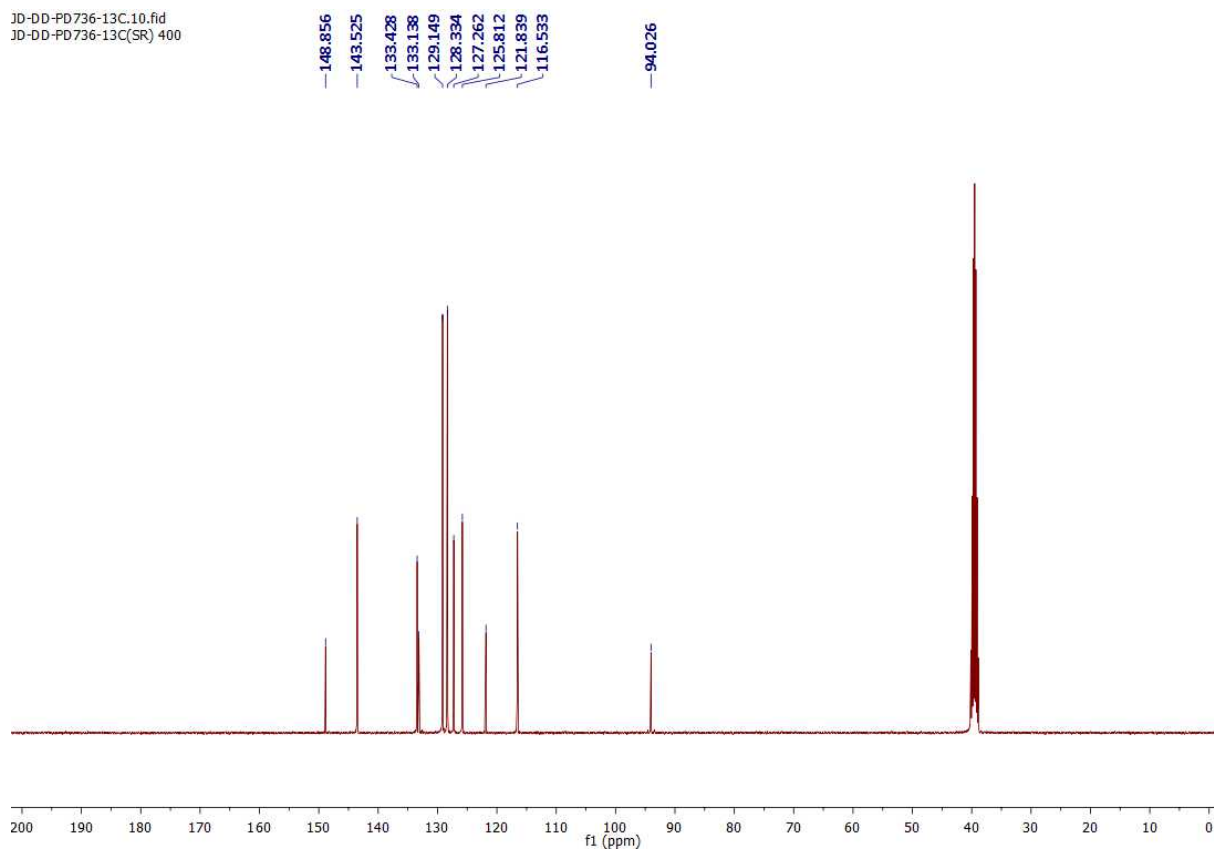

PD-735-1H/1

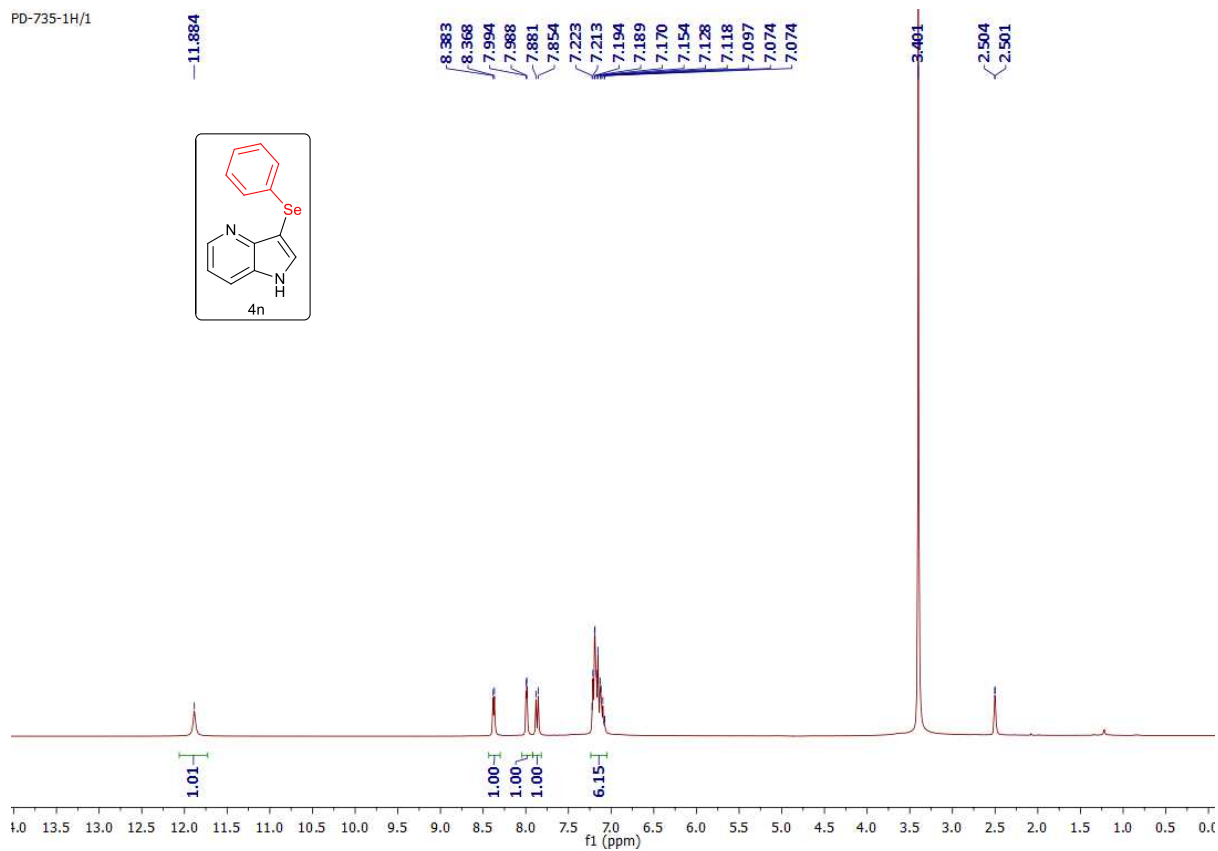

PD-735-C/1

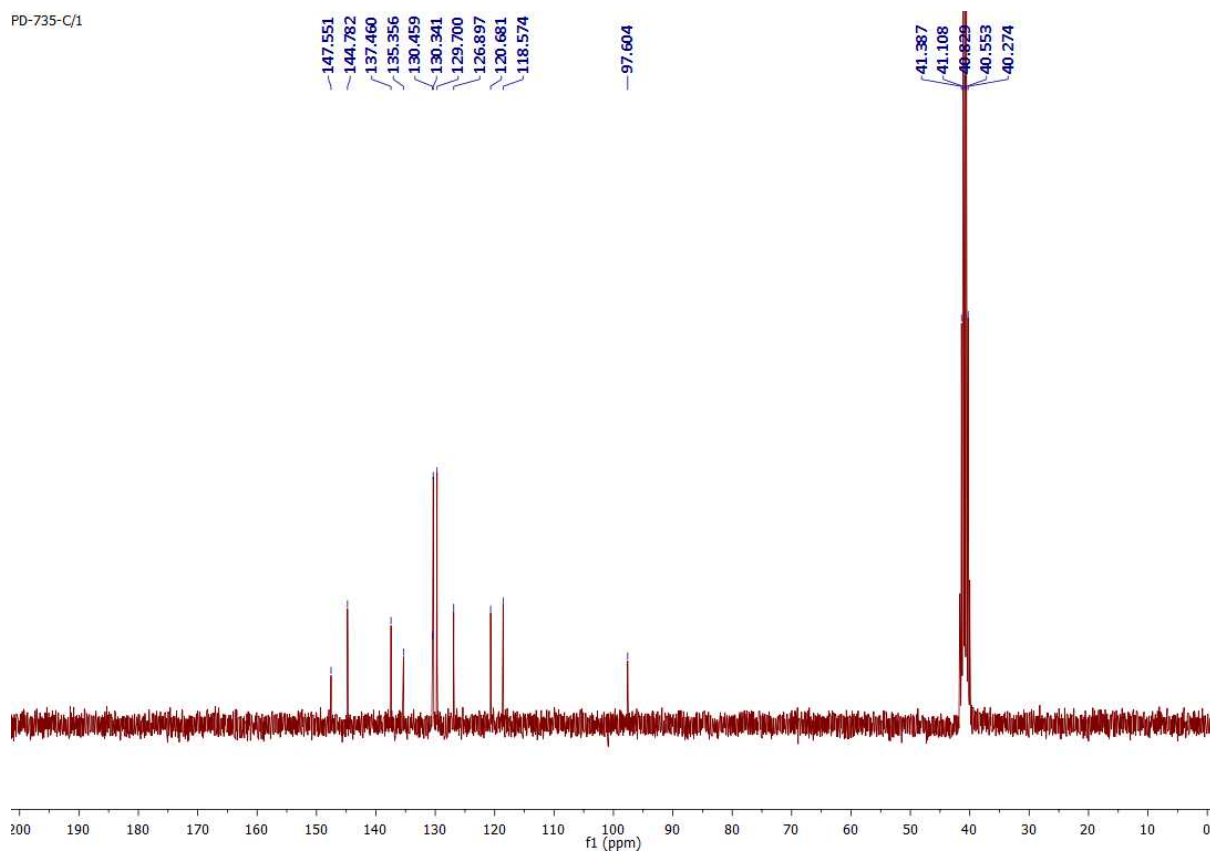

PD-730F  
single\_pulse

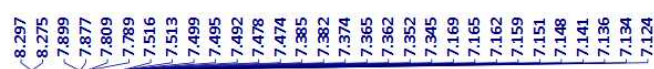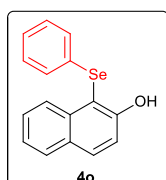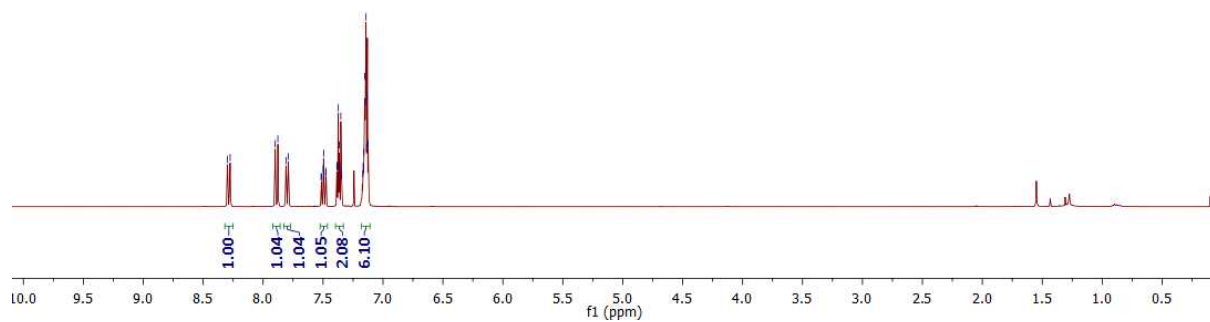



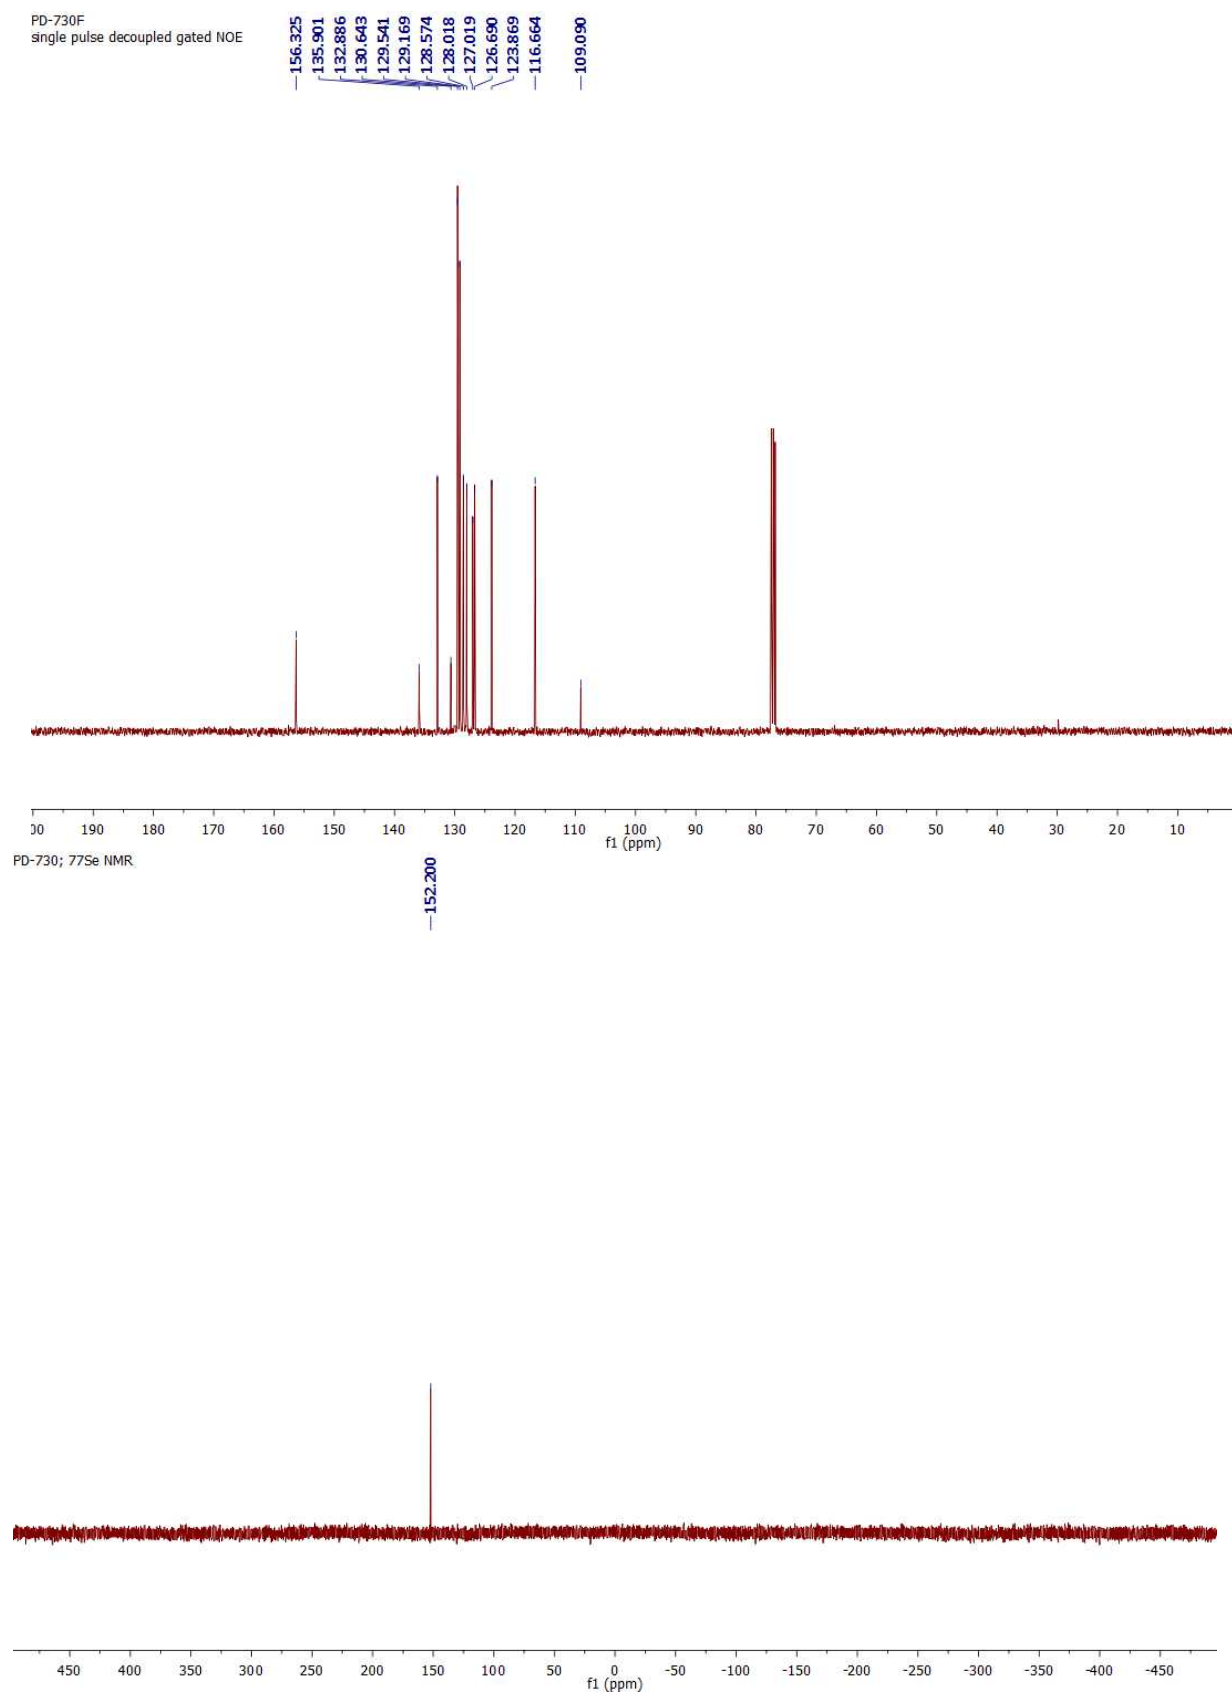

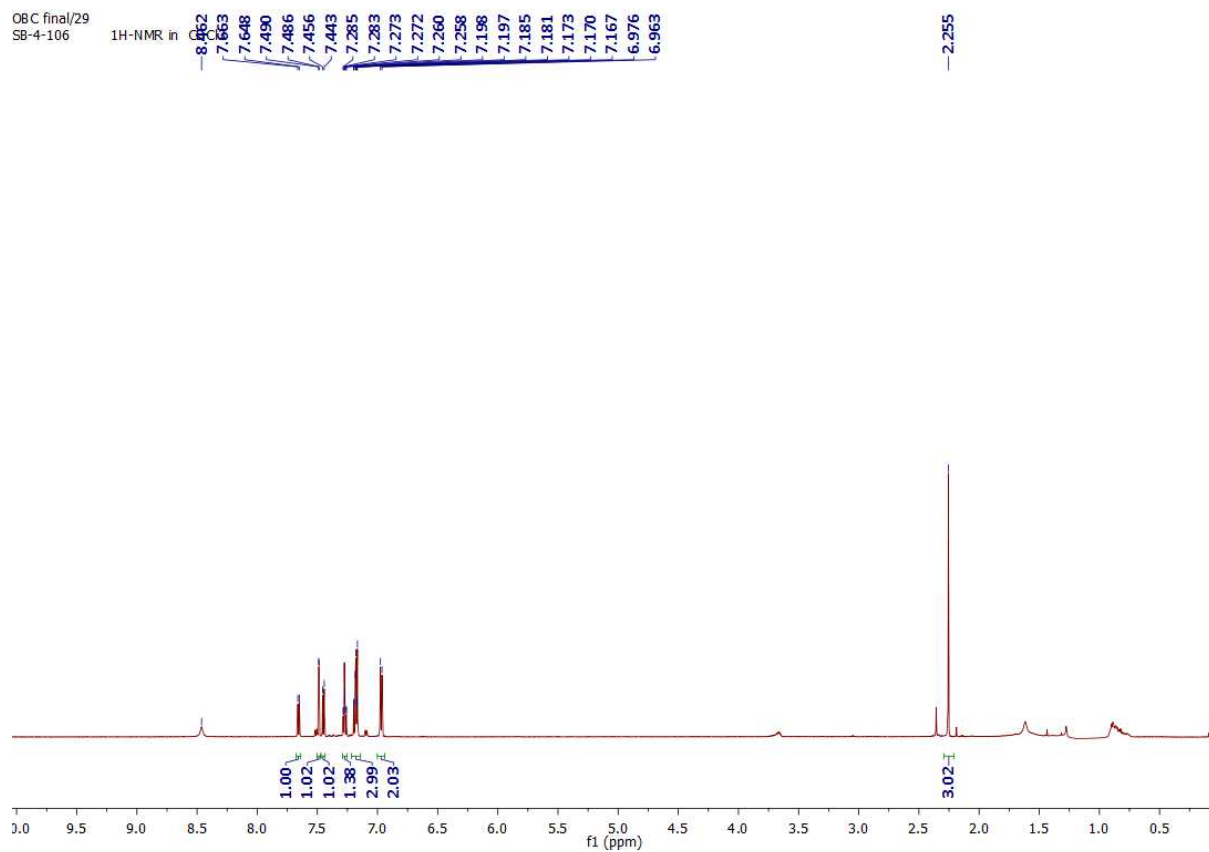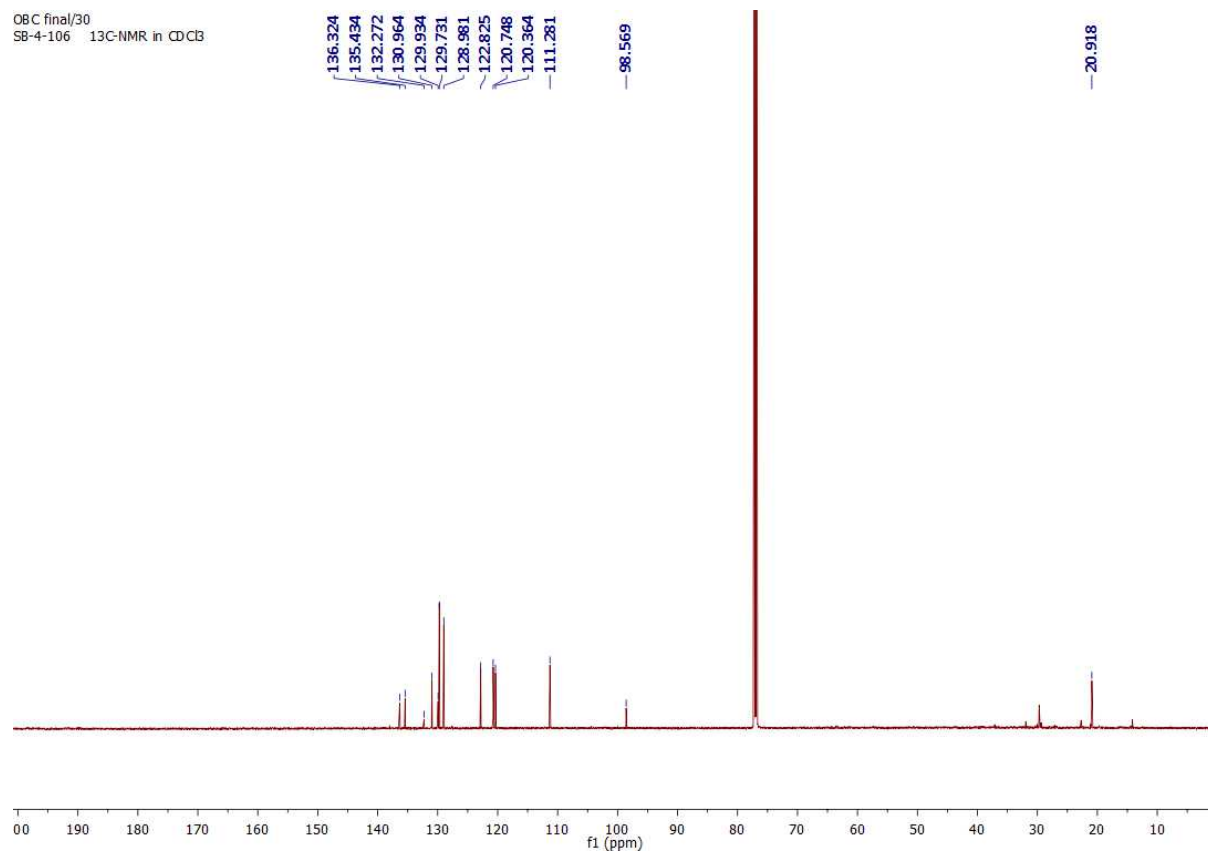

OB  
SB-4-105  
8.3993  
7.8881  
7.6773  
7.466  
7.462  
7.435  
7.433  
7.421  
7.420  
7.388  
7.287  
7.276  
7.272  
7.256  
7.207  
7.195  
7.182  
6.743  
6.729

—3.742

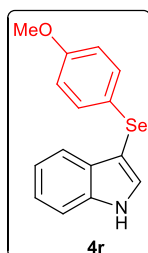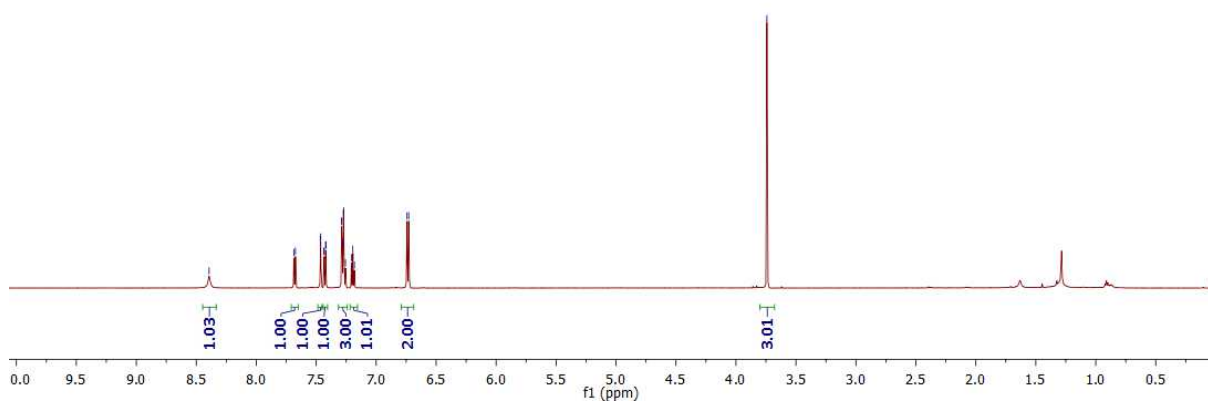

OB C final/28  
SB-4-105 <sup>13</sup>C-NMR in CDCl<sub>3</sub>

—158.271

136.297  
131.185  
130.608  
129.840  
123.352  
122.810  
120.718  
120.315  
114.717  
111.299

—99.418

—55.250

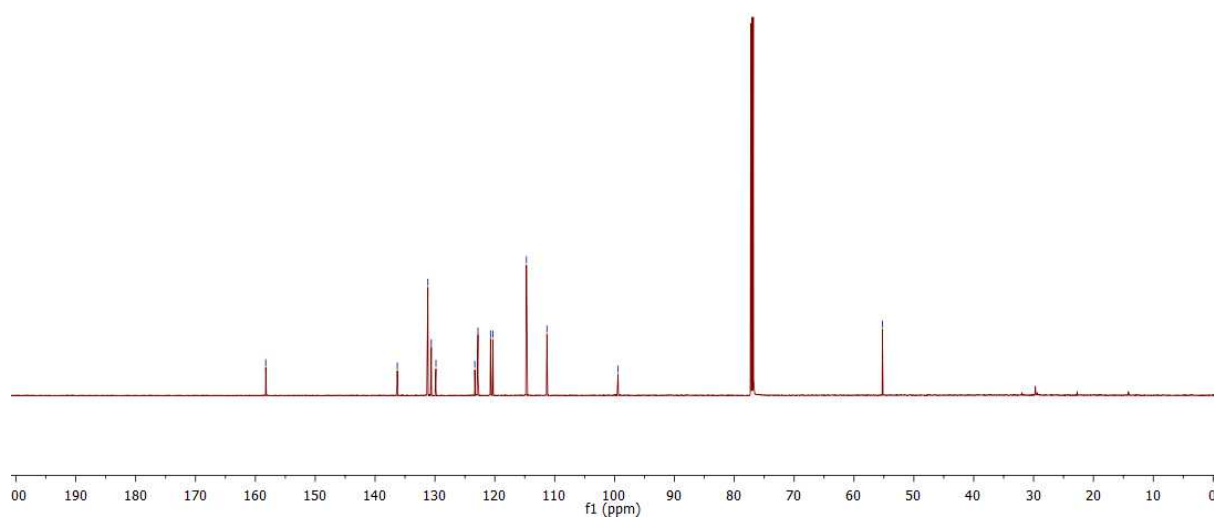

OB C final/25  
SB-4-104 1H-NMR in

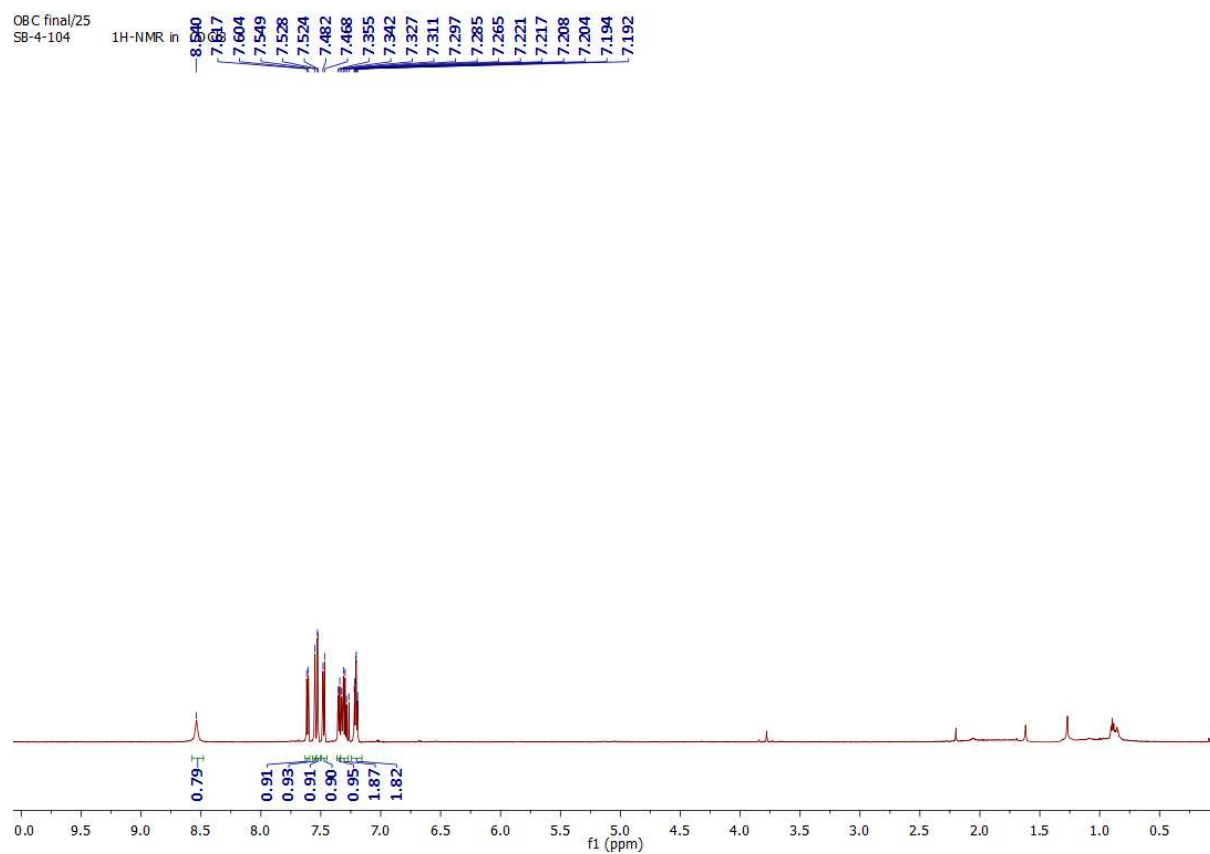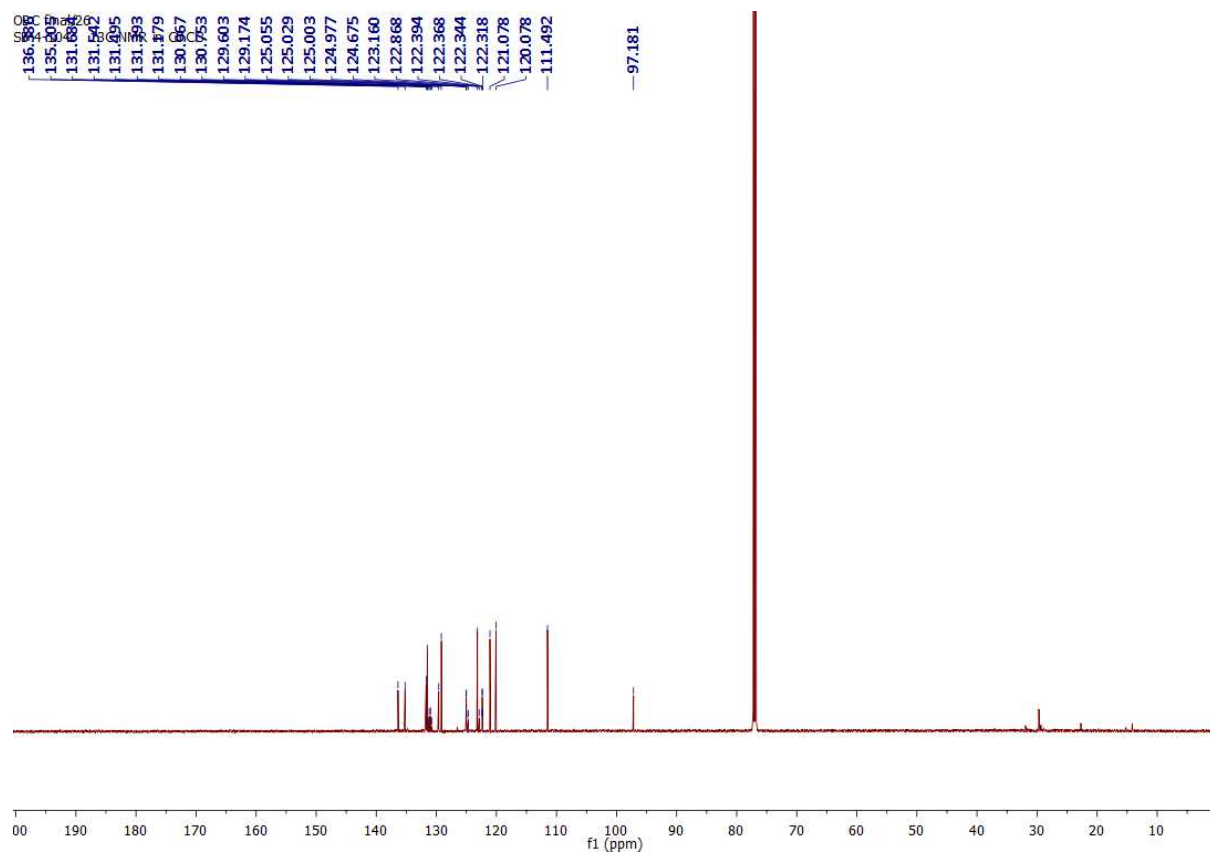

SB-4-104; <sup>77</sup>Se NMR

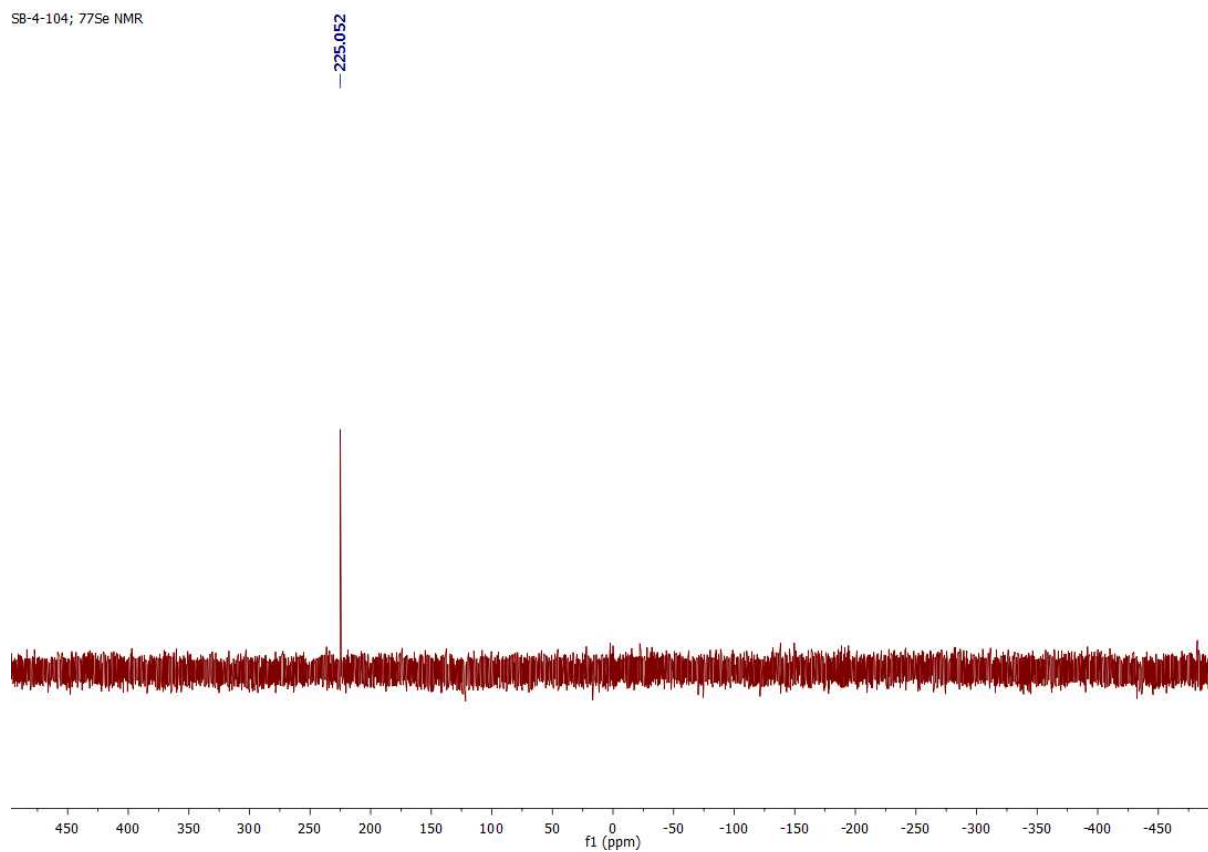

PD-1176  
PD-1176  
7.956  
7.951  
7.551  
7.538  
7.533  
7.530  
7.395  
7.378  
7.374  
7.359  
7.354  
7.353  
7.334  
7.321  
7.318  
7.314  
7.305  
7.286  
7.267  
7.248  
7.212  
7.209  
7.197  
7.190  
7.189  
7.181

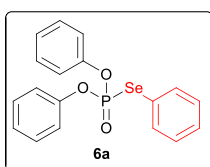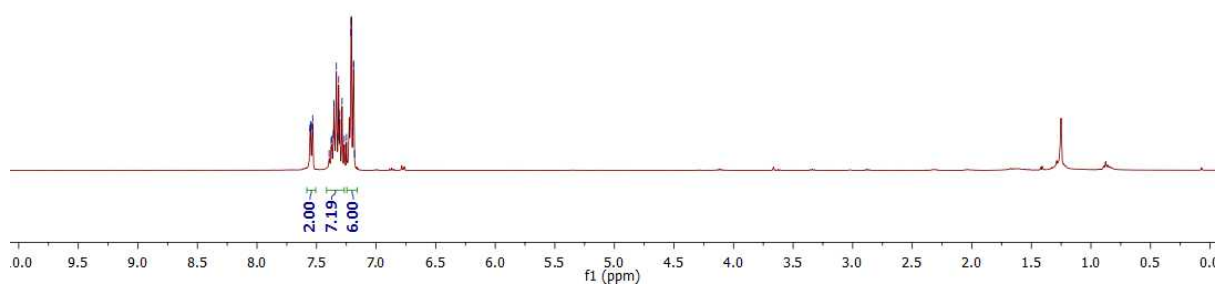

PD-1178  
PD-1178-13C

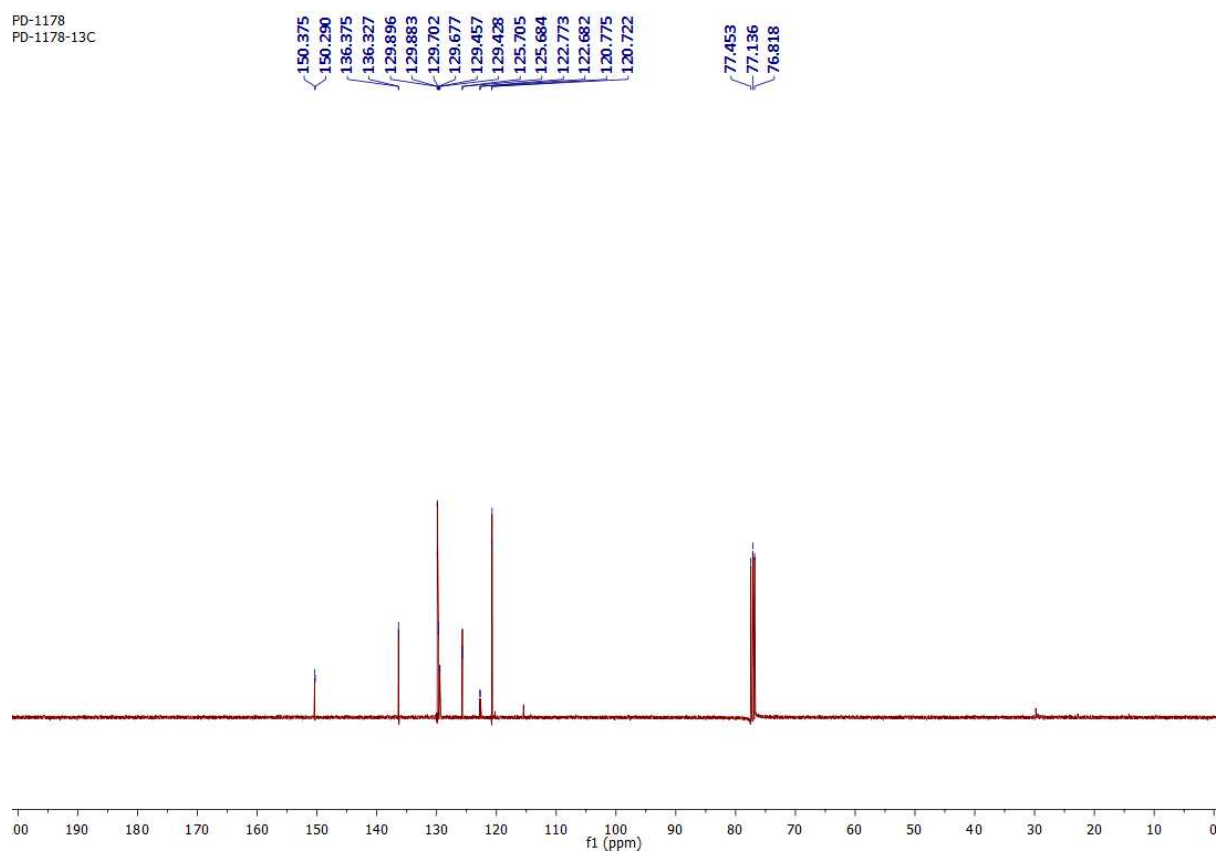

PD-1178  
PD-1178-31P

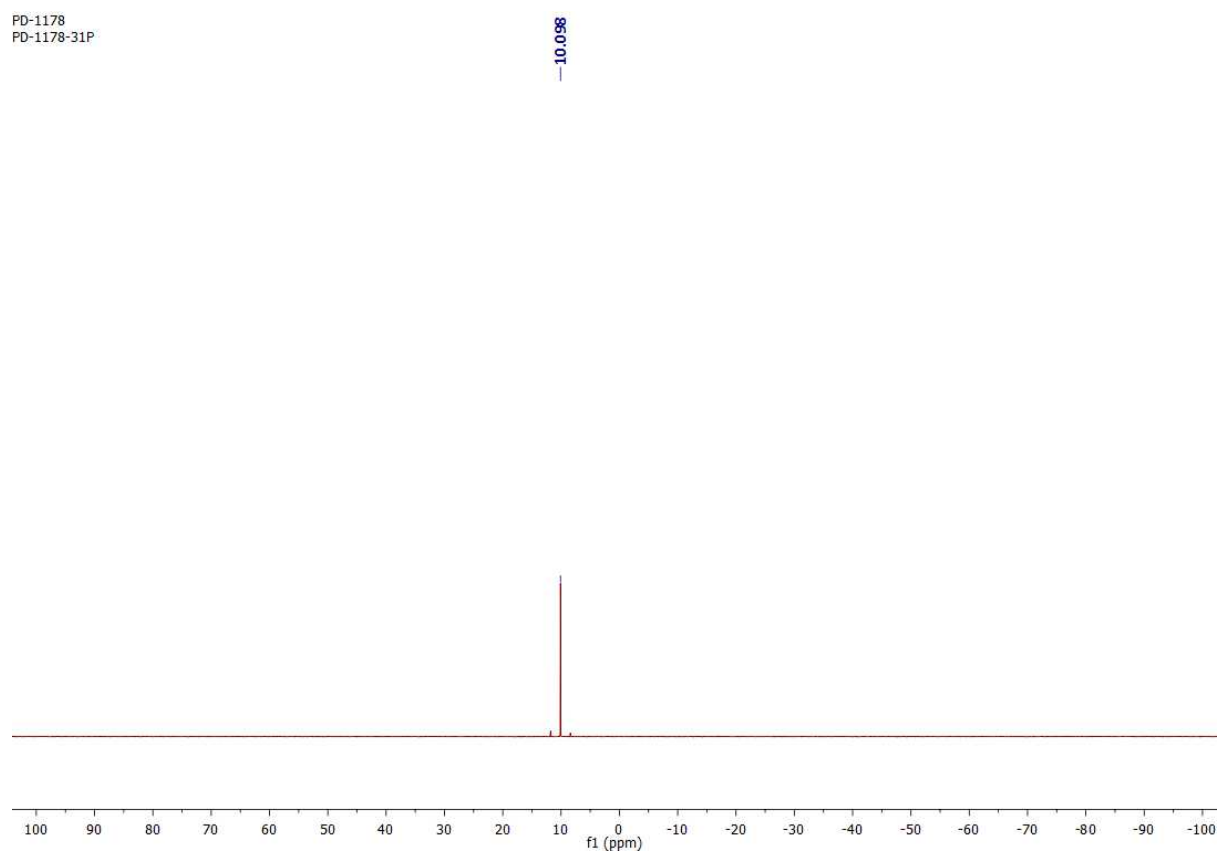

PD-1178;  $^{77}\text{Se}$  NMR

302.011  
294.874

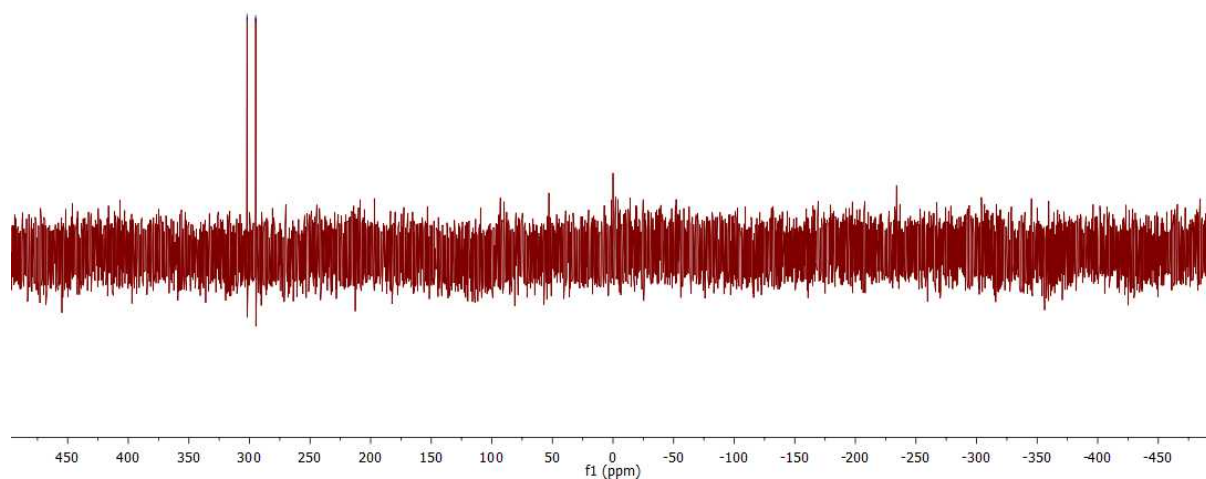

seleno phospho NMR/pd-67-h  
PD-67  $^1\text{H}$ -NMR in  $\text{CDCl}_3$

7.461  
7.458  
7.447  
7.444  
7.382  
7.369  
7.356  
7.273  
7.258  
7.246  
7.240  
7.237  
7.235  
7.224

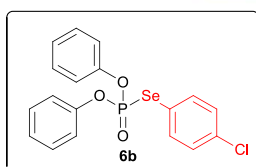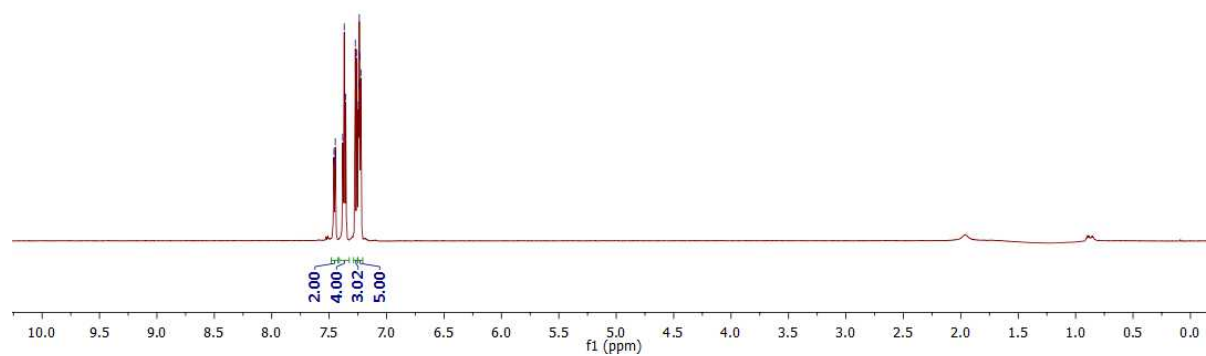

nmr/pd-67-c  
PD-67 13C-NMR in CDCl3

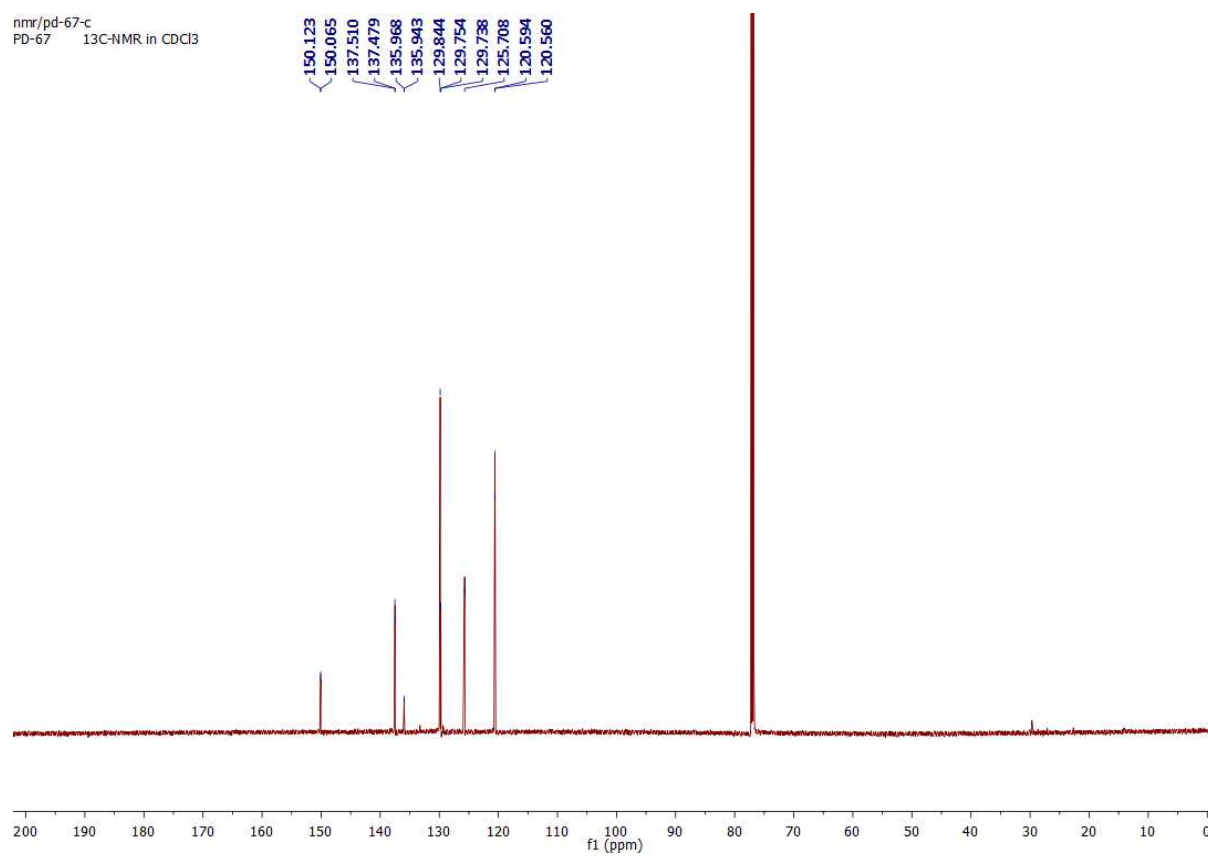

JD-DD-PD-67-31P1.fid  
JD-DD-PD-67-31P  
1H De-Coupled

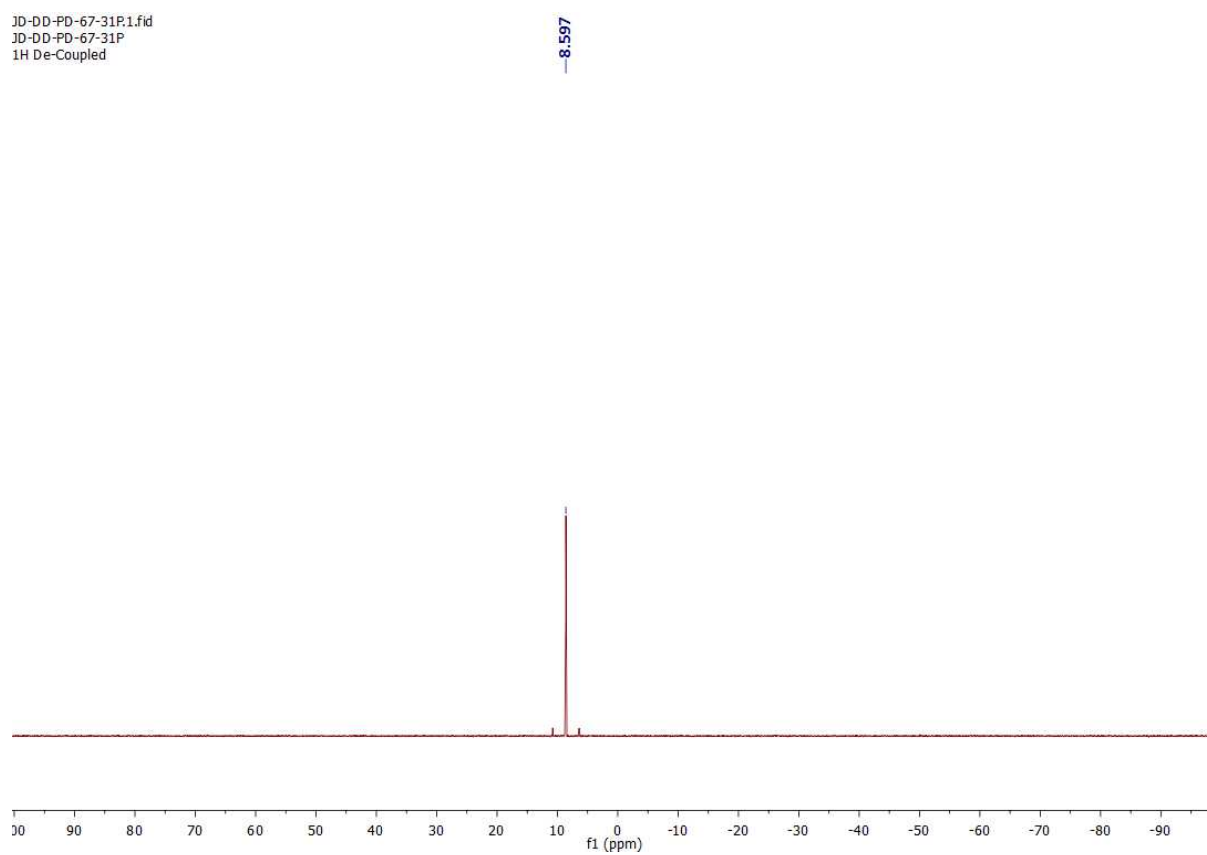



nmr/pd-53-h  
PD53 1H-NMR in CDCl3

7.633  
7.620  
7.347  
7.335  
7.324  
7.302  
7.289  
7.277

4.144  
4.132  
4.115  
4.104  
4.092  
4.075  
4.061  
4.045  
4.035

1.633  
1.621  
1.609  
1.597  
1.585  
1.361  
1.348  
1.336  
1.323  
1.310  
1.298  
0.892  
0.880  
0.868

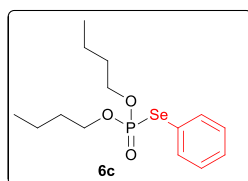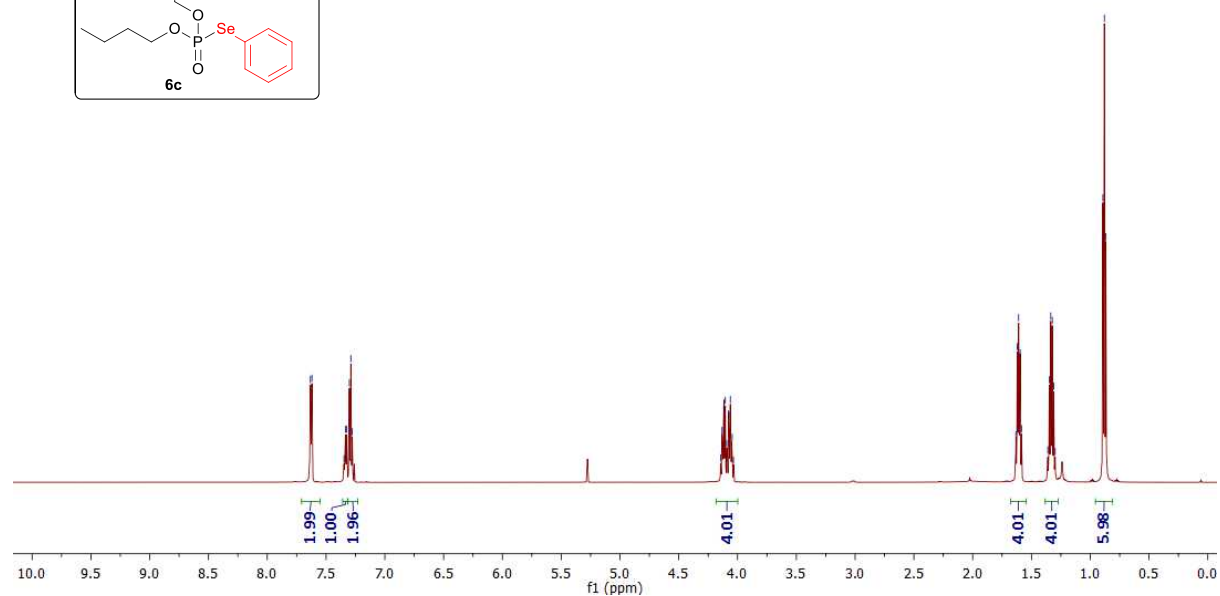

nmr/pd-53-c  
PD53 13C-NMR in CDCl3

135.511  
135.481  
129.444  
129.432  
128.727  
128.710  
123.850  
123.795

77.301  
77.090  
76.877  
67.601  
67.559

32.058  
32.010  
18.679  
13.574

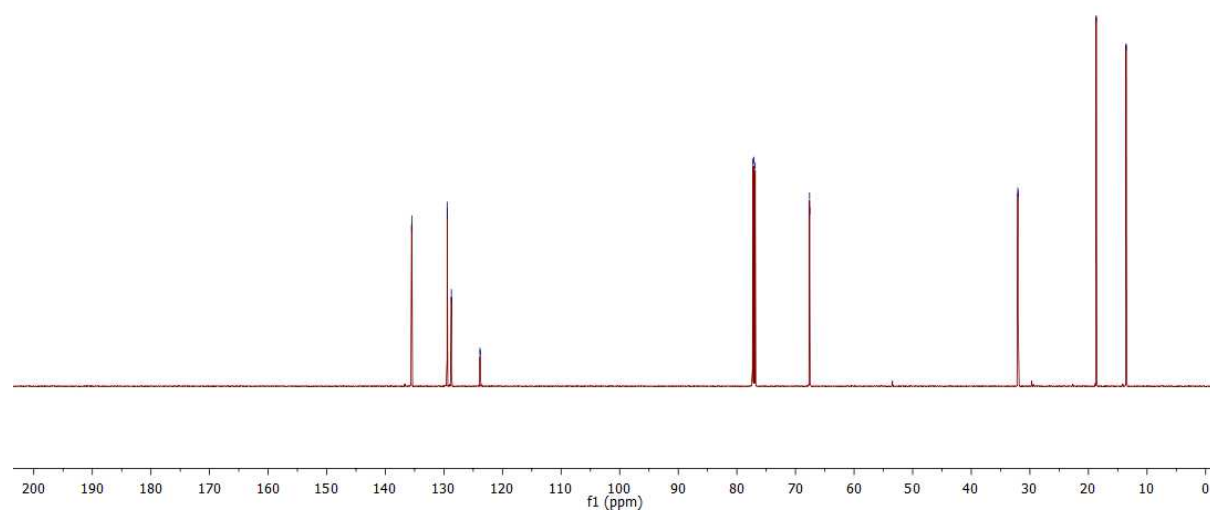

SK-PD-53-31P/1  
SK-PD-53-31P  
1H De-Coupled

-18.017

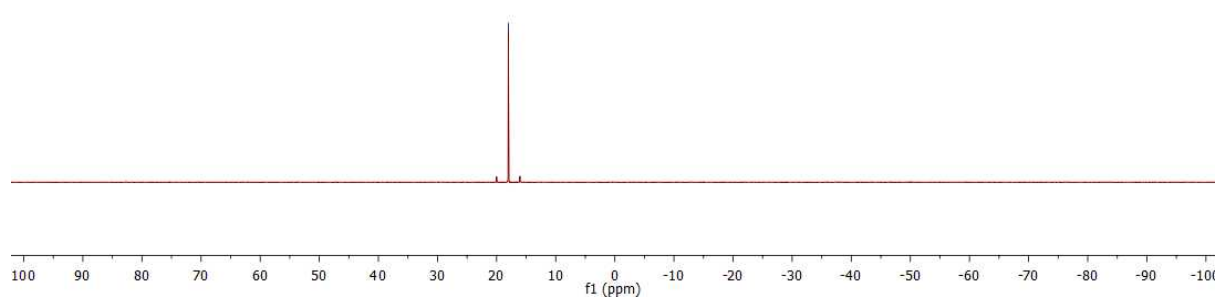

nmr/pd-63-h  
PD-63

1H-NMR in CDCl<sub>3</sub>

7.546  
7.542  
7.531  
7.528  
6.847  
6.832

4.143  
4.132  
4.126  
4.119  
4.115  
4.102  
4.091  
4.089  
4.078  
4.064  
4.053  
4.047  
4.037  
3.795  
1.651  
1.639  
1.627  
1.614  
1.603  
1.386  
1.373  
1.361  
1.348  
1.336  
1.323  
0.916  
0.903  
0.891

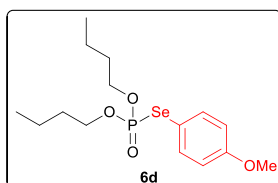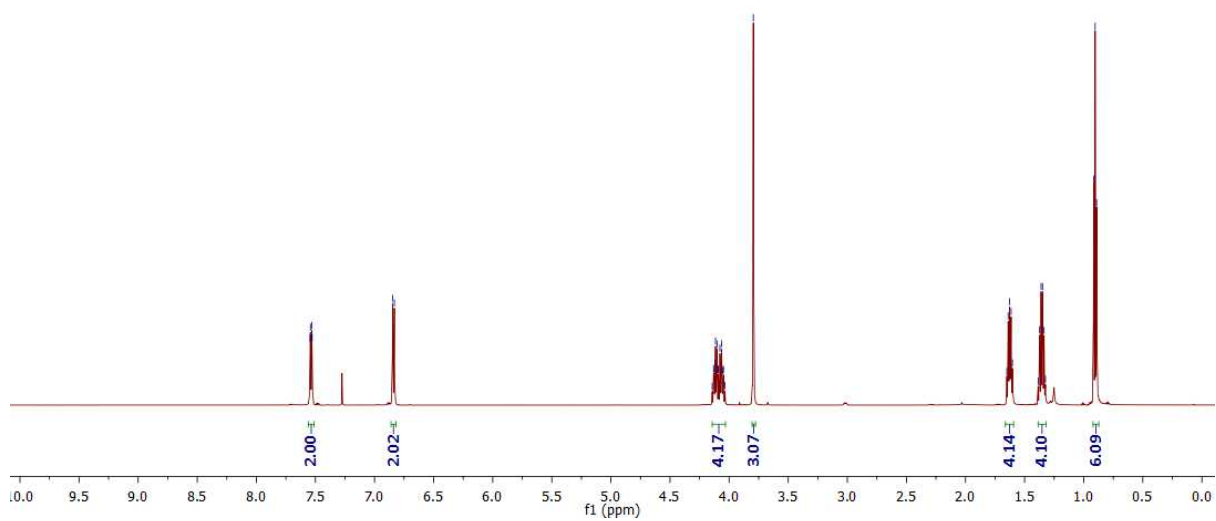

nmr/pd-63-c  
PD-63 <sup>13</sup>C-NMR in CDCl<sub>3</sub>

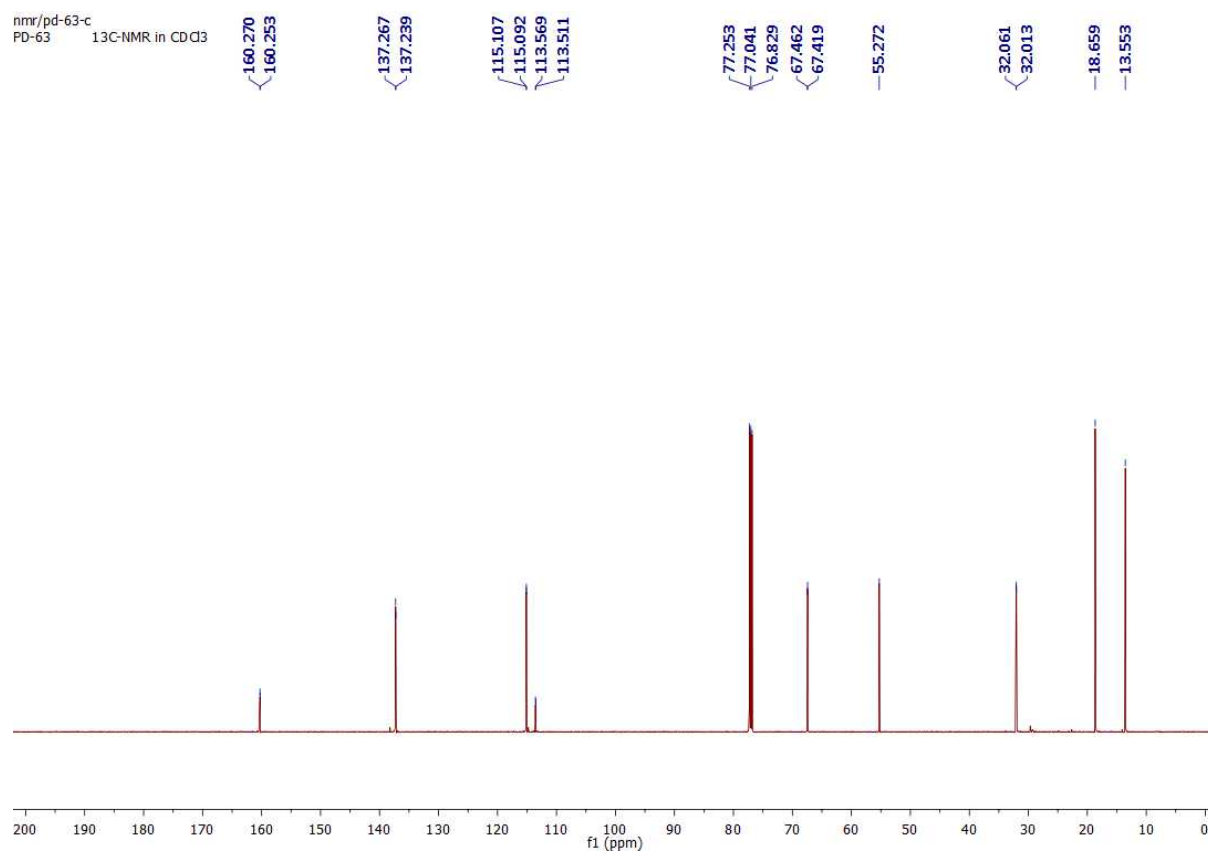

SK-PD-63-31P/1  
SK-PD-63-31P  
1H De-Coupled

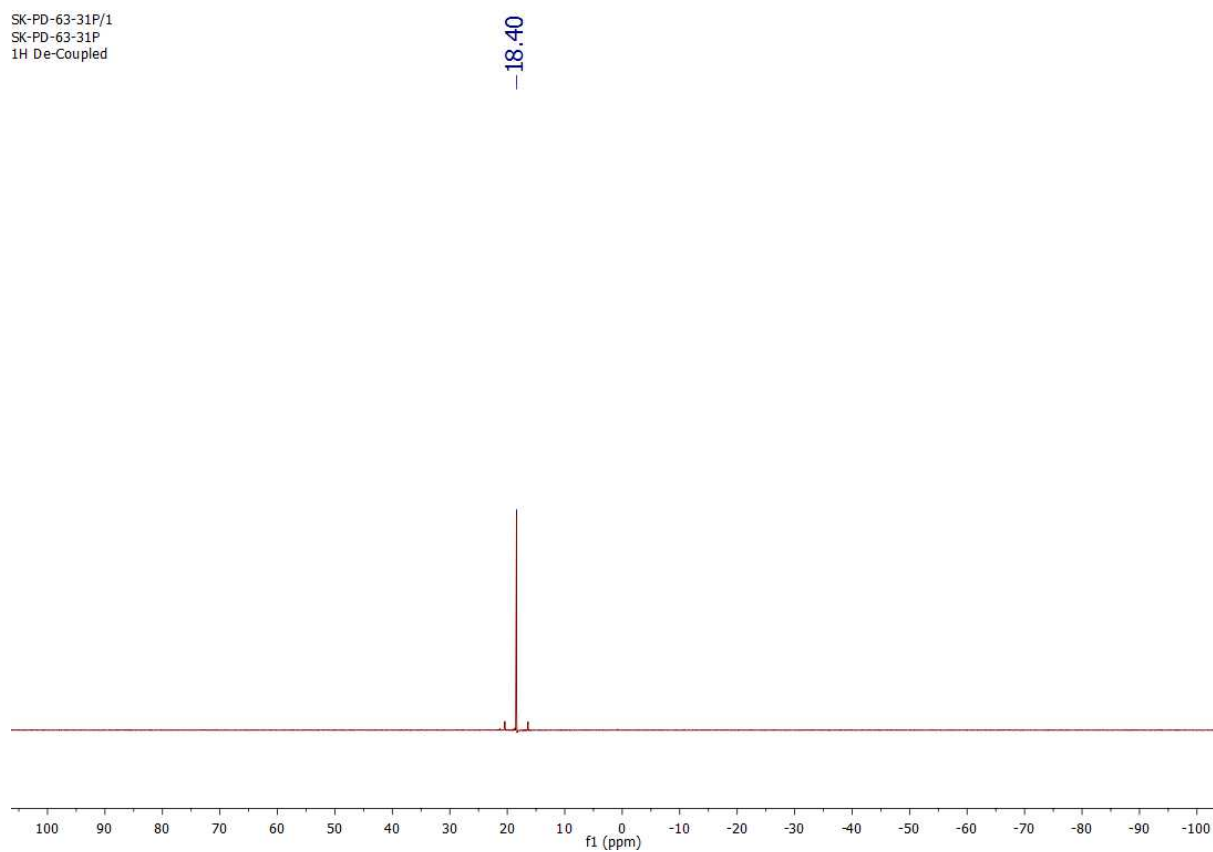

PD-63;  $^{77}\text{Se}$  NMR

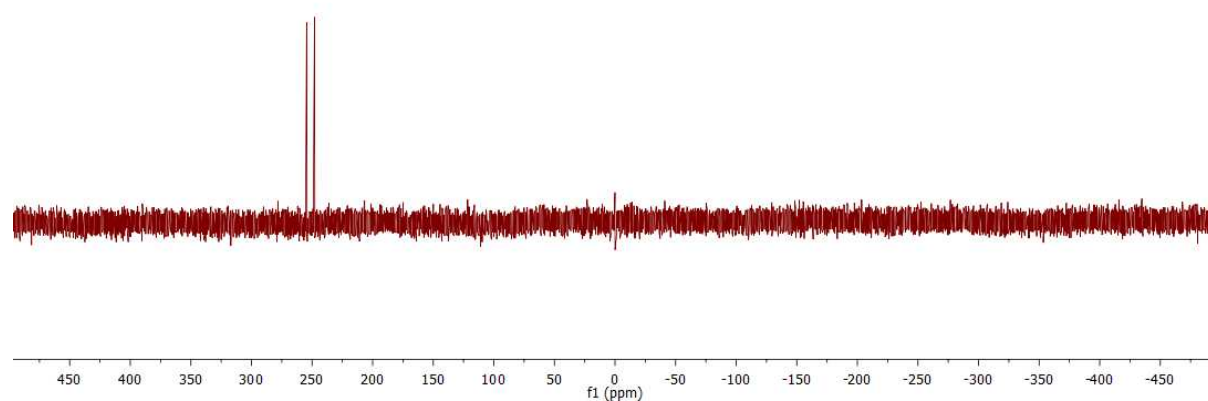

nmr/pd-81-h  
PD81

$^1\text{H}$ -NMR in  $\text{CDCl}_3$   
7.829  
7.626  
7.620  
7.617  
7.614  
7.611  
7.605  
7.602  
7.027  
7.013  
6.999

4.157  
4.146  
4.141  
4.133  
4.130  
4.117  
4.106  
4.097  
4.086  
4.072  
4.061  
4.055  
4.044  
1.655  
1.643  
1.632  
1.619  
1.608  
1.384  
1.371  
1.359  
1.346  
1.334  
1.321  
0.918  
0.905  
0.893

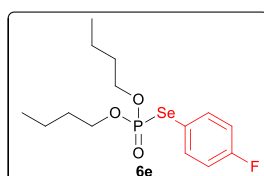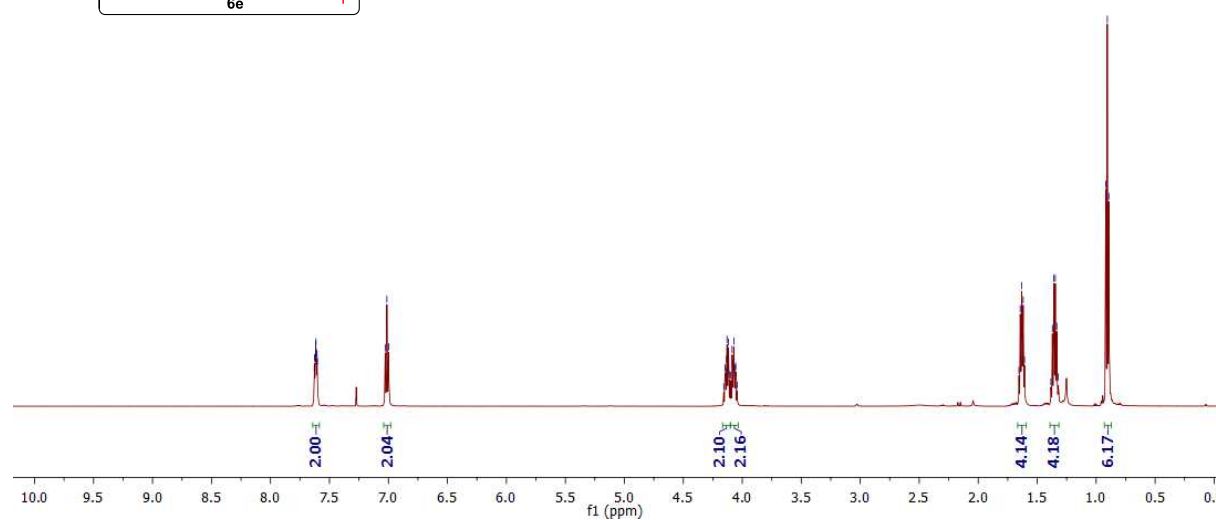

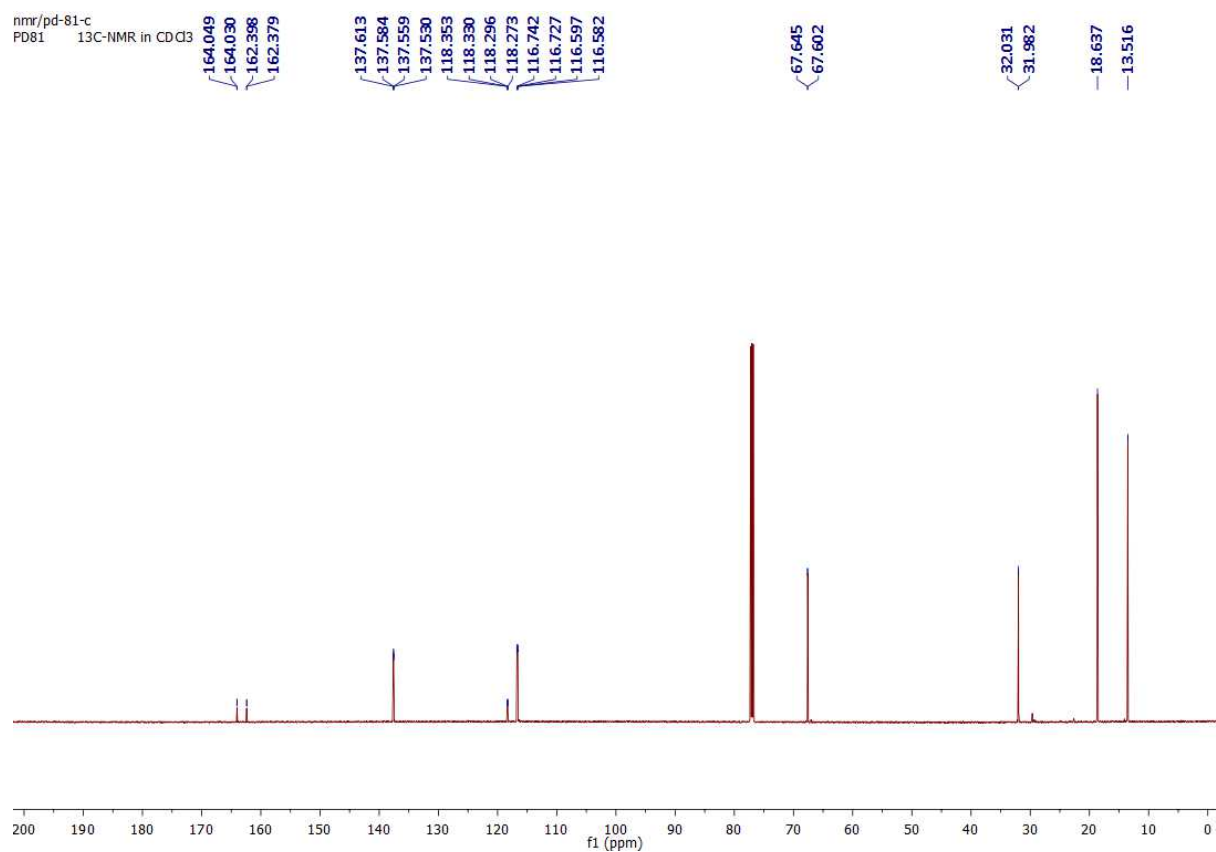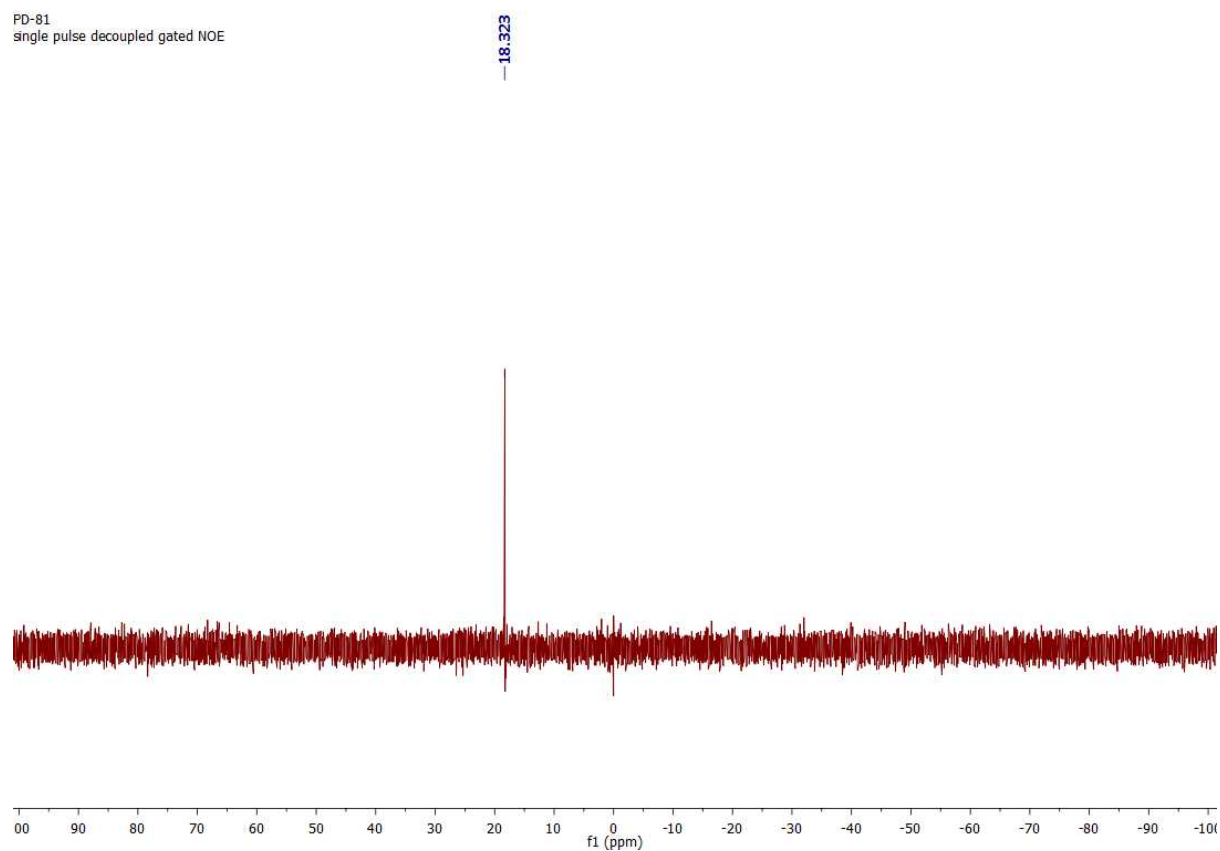

nmr/pd-82-h  
PD82 1H-NMR in CDCl3

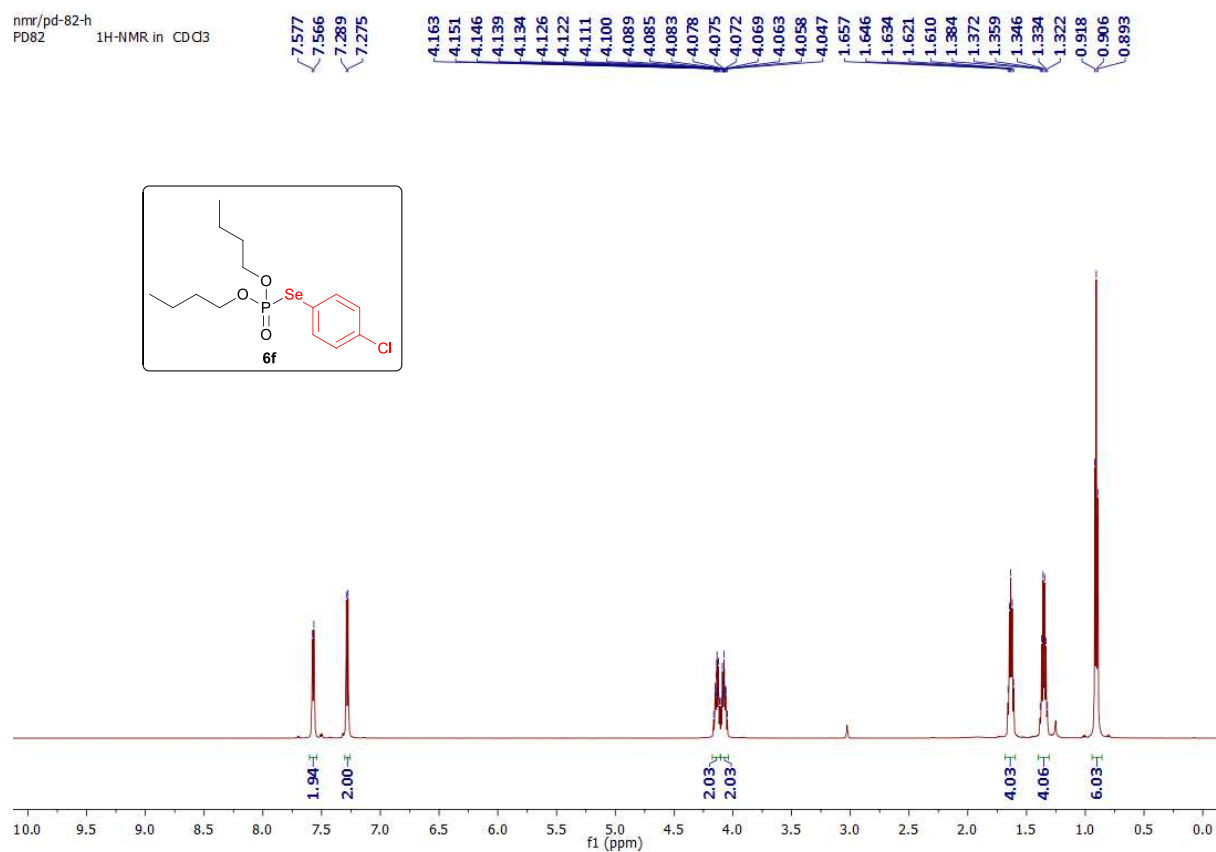

nmr/pd-82-c  
PD82 13C-NMR in CDCl3

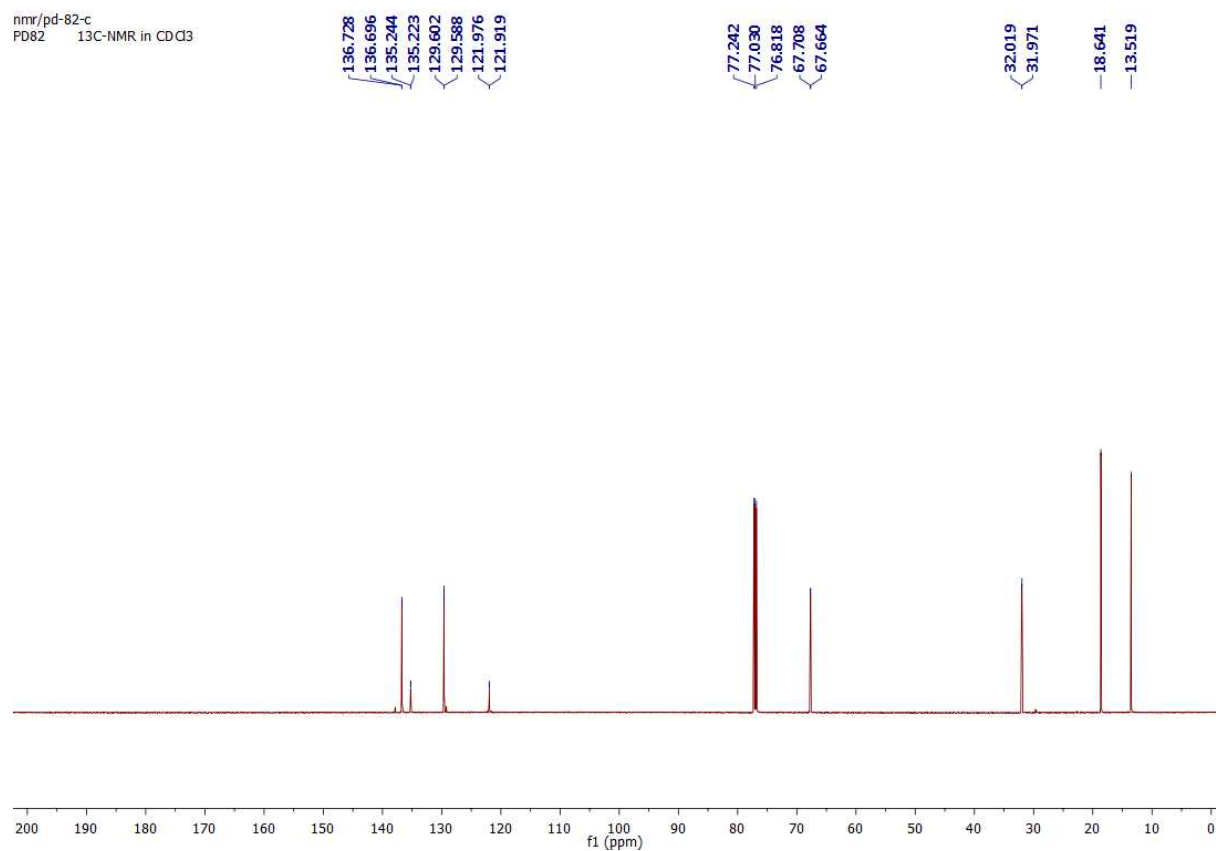

SK-PD-82-31P/1  
SK-PD-82-31P  
1H De-Coupled

-17.26

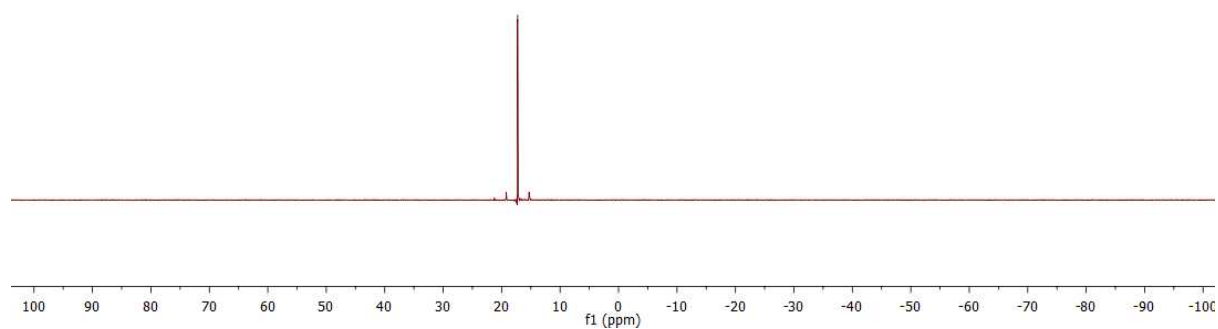

nmr/pd-74-h  
PD74 1H-NMR in CDCl3

7.373  
7.361  
7.314  
7.302  
7.289  
7.260  
7.255  
7.243  
7.231

4.219  
4.199  
4.012  
4.005  
3.994  
3.987  
3.838  
3.819  
3.795  
3.777

1.289  
0.847

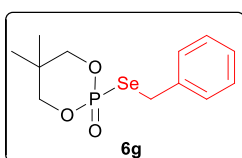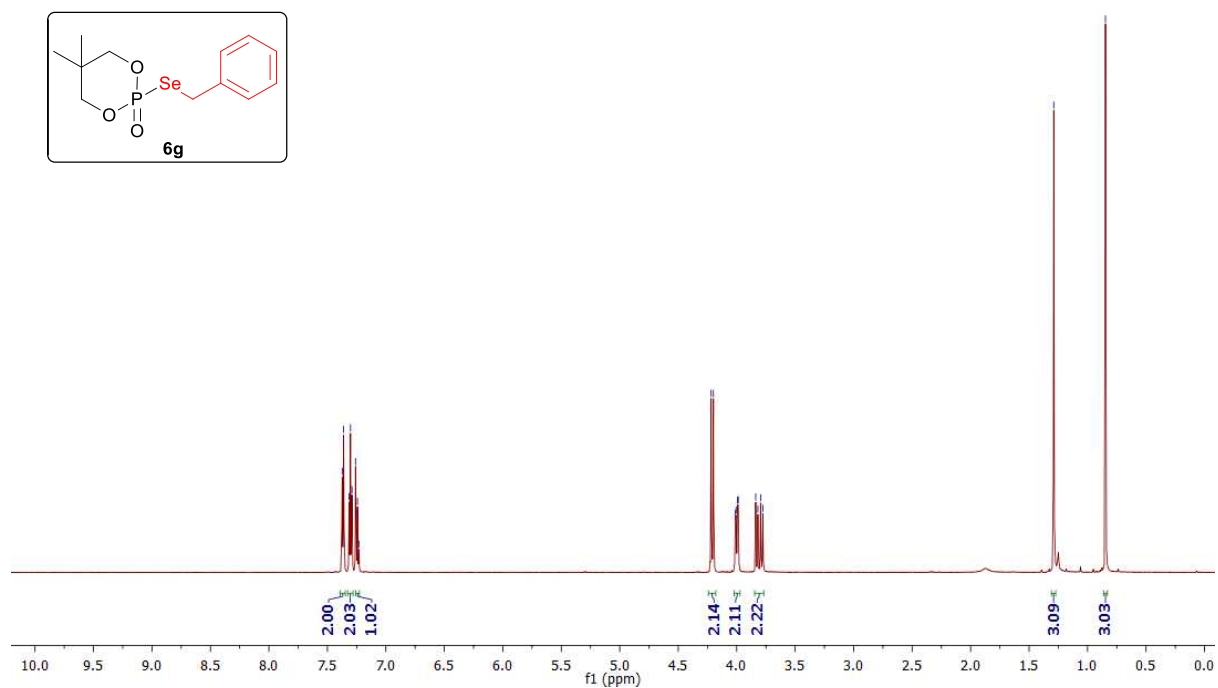

RJ-0217/pd-74-c  
PD74 <sup>13</sup>C-NMR in CDCl<sub>3</sub>

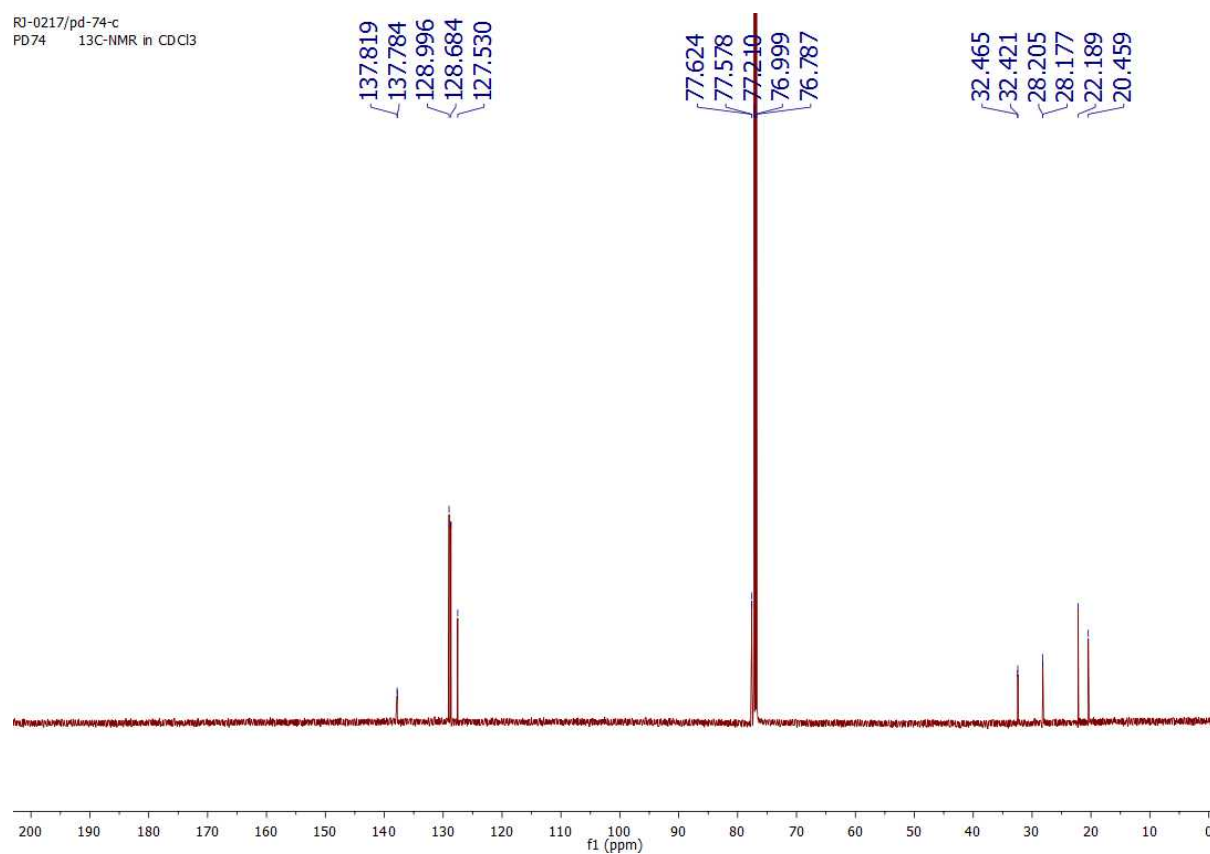

SK-PD-74-31P/1  
SK-PD-74-31P  
1H De-Coupled

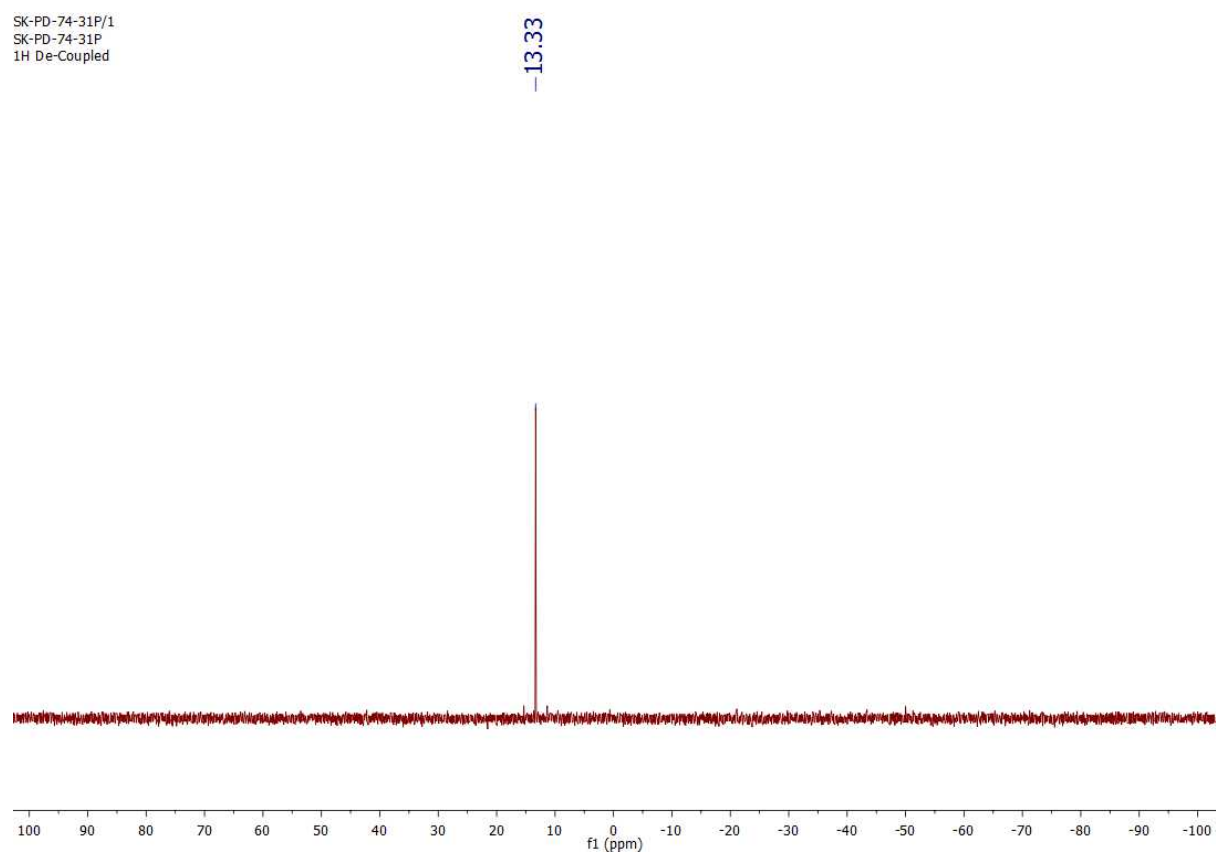



nmr/pd-52-h

PD-52 1H-NMR in CDCl<sub>3</sub>

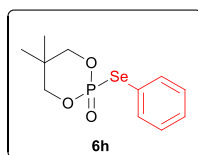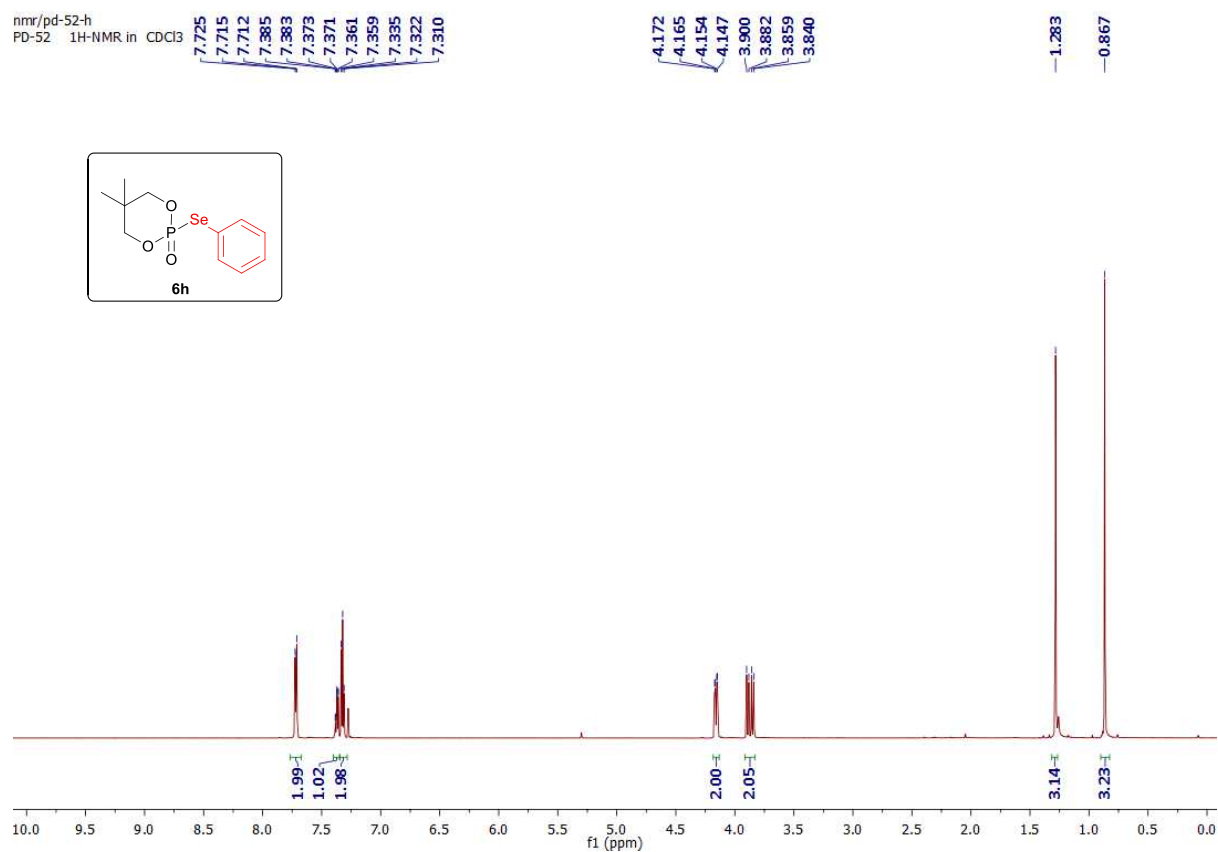

PD-52-C.1.fid

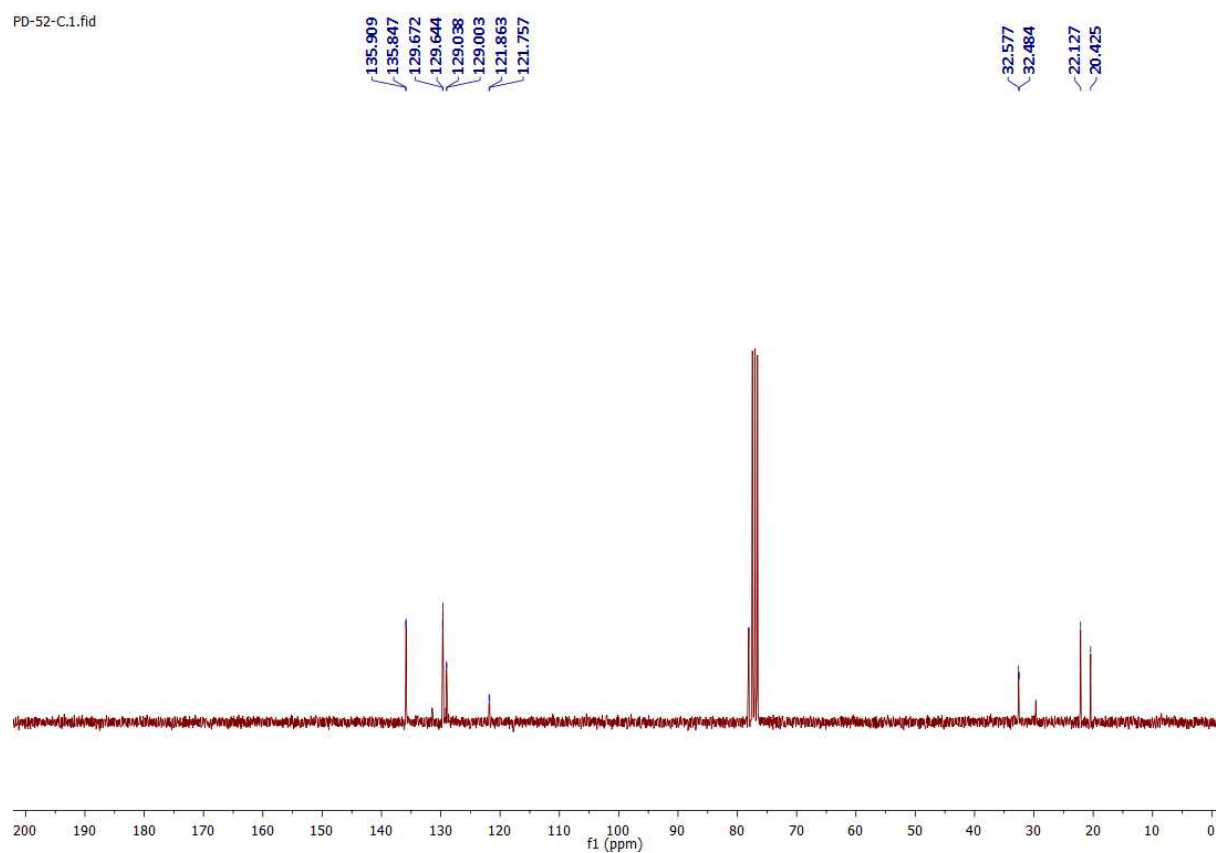

JD-DD-PD-52-31F.1.fid  
JD-DD-PD-52-31P  
1H De-Coupled

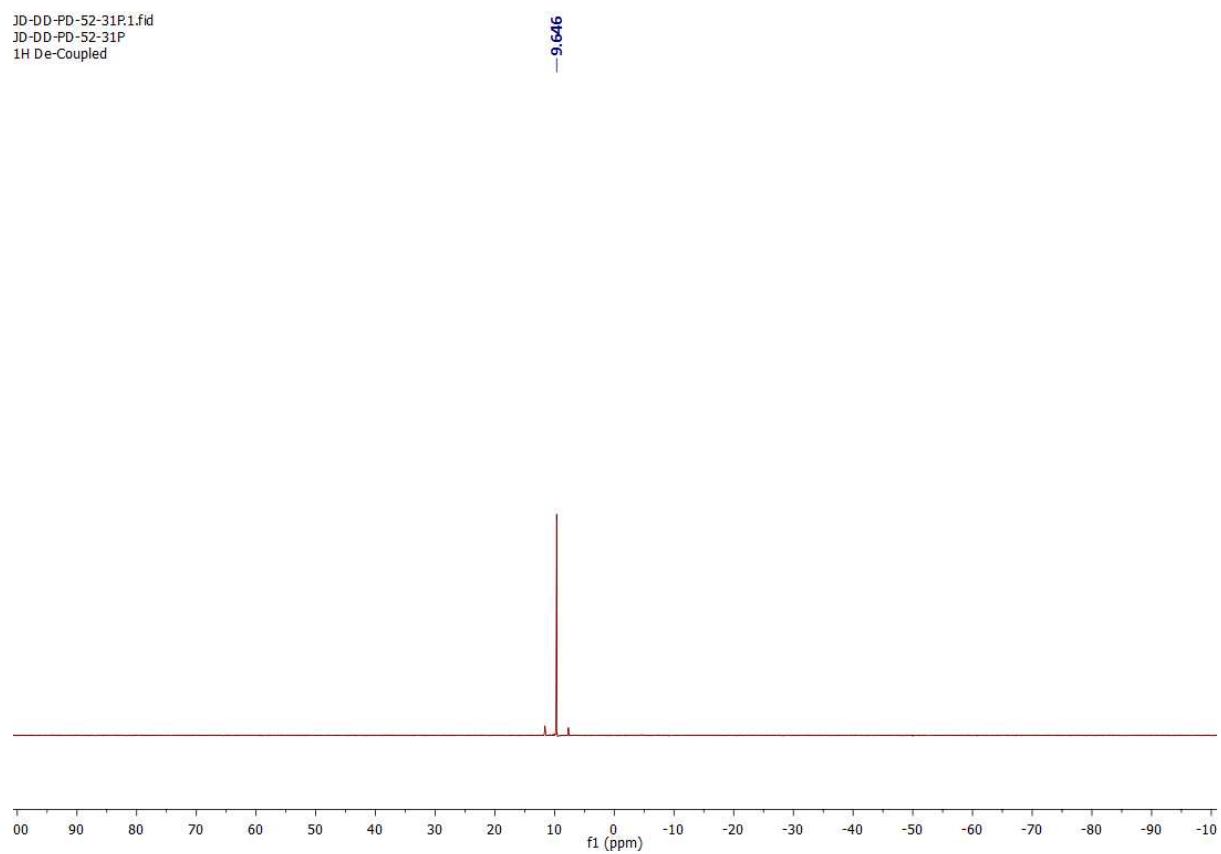

PD-52; 77Se NMR

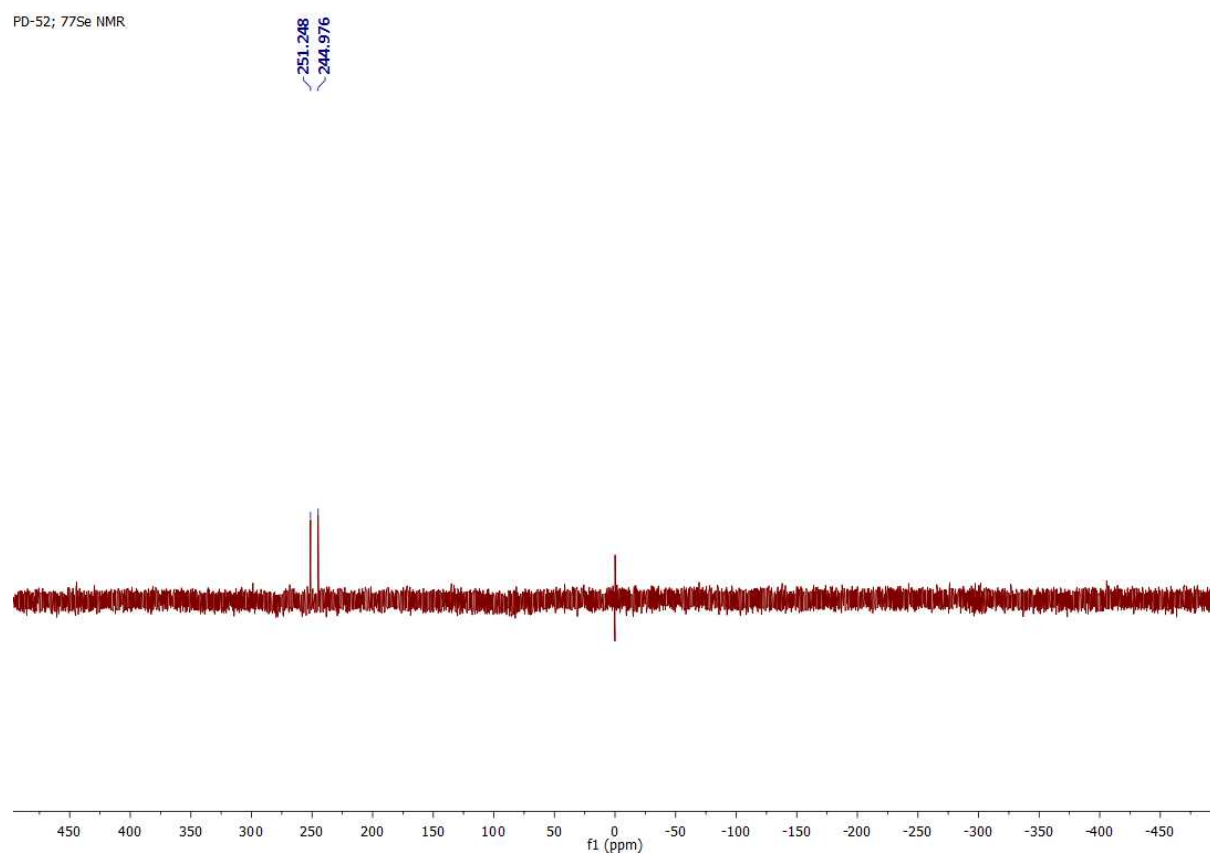

nmr/pd-103-h  
PD103 1H-NMR in CDCl<sub>3</sub>

7.967  
7.954  
7.934  
7.633  
7.620  
7.475  
7.462  
7.449

4.191  
4.184  
4.173  
4.166  
3.949  
3.947  
3.933  
3.930  
3.907  
3.905  
3.891  
3.889

1.292  
0.892

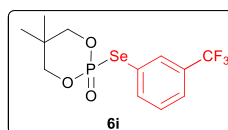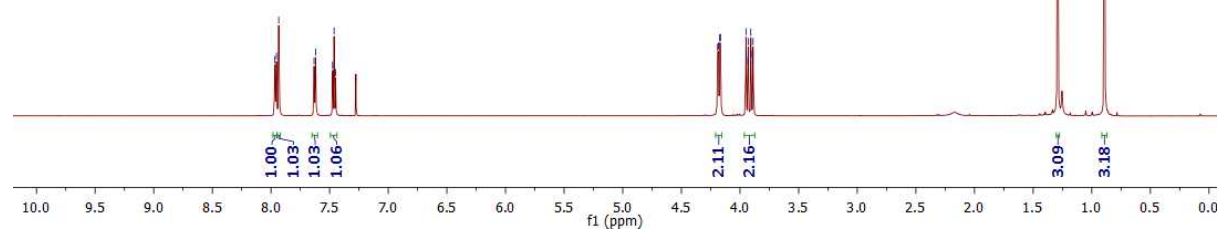

nmr/pd-103-c  
PD103 13C-NMR in CDCl<sub>3</sub>

139.637  
139.209  
132.221  
132.196  
132.167  
132.138  
132.108  
131.882  
131.869  
131.665  
131.652  
130.029  
130.015  
125.879  
125.855  
125.835  
125.813  
125.789  
124.261  
123.050  
122.998  
122.453

32.593  
32.548  
22.020  
20.339

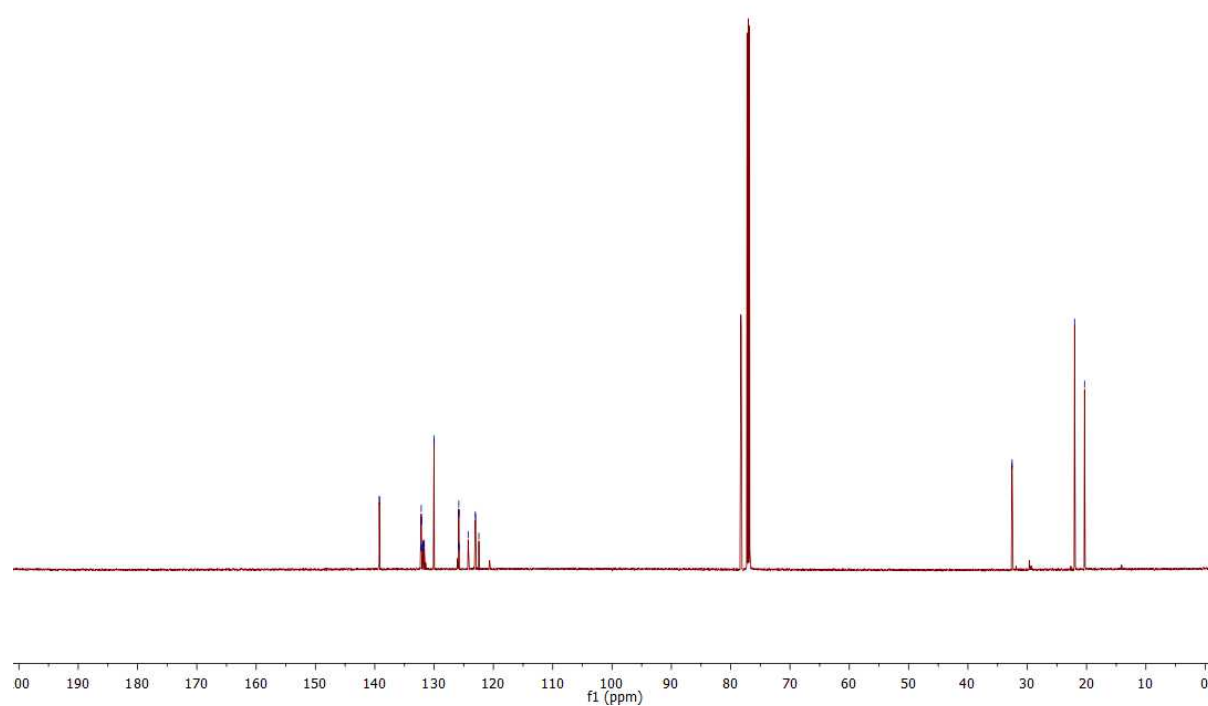

SK-PD-103-31P/1  
SK-PD-103-31P  
1H De-Coupled

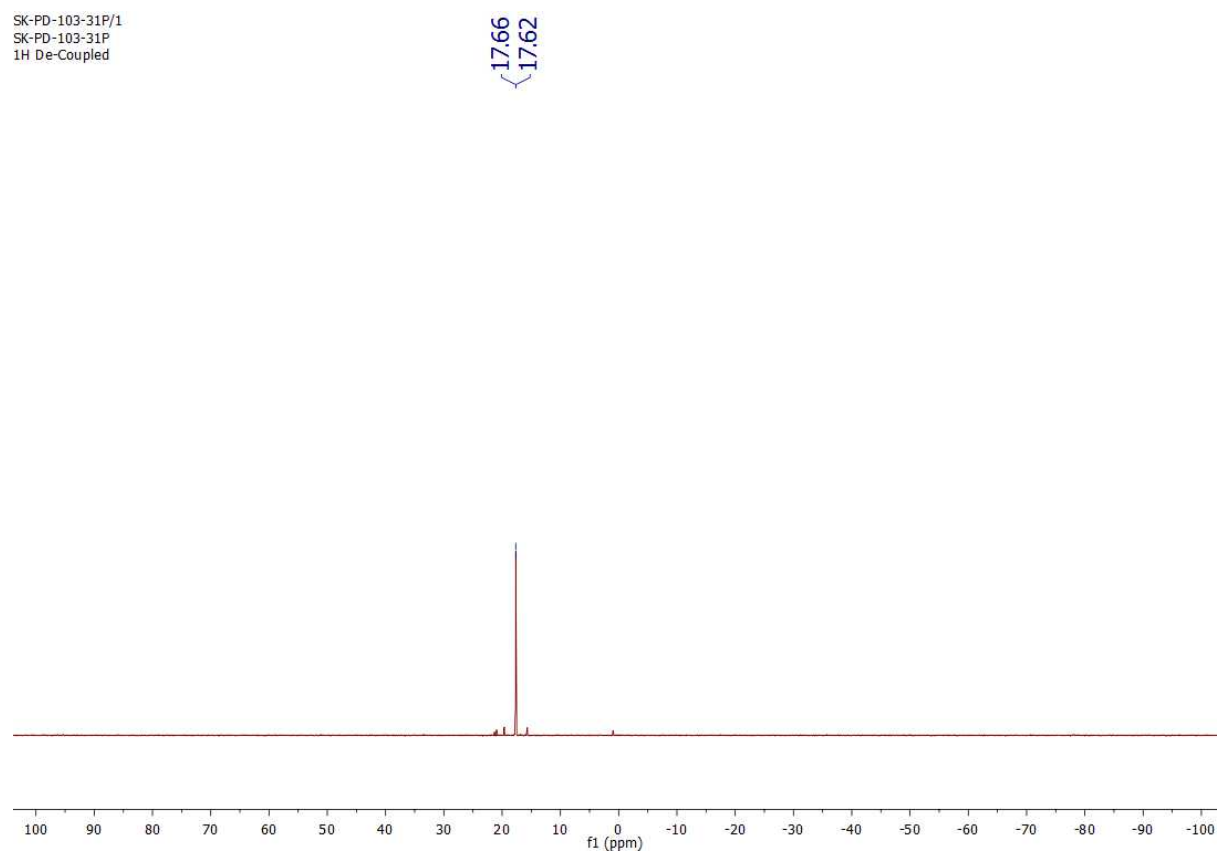

PD-103; 77Se NMR

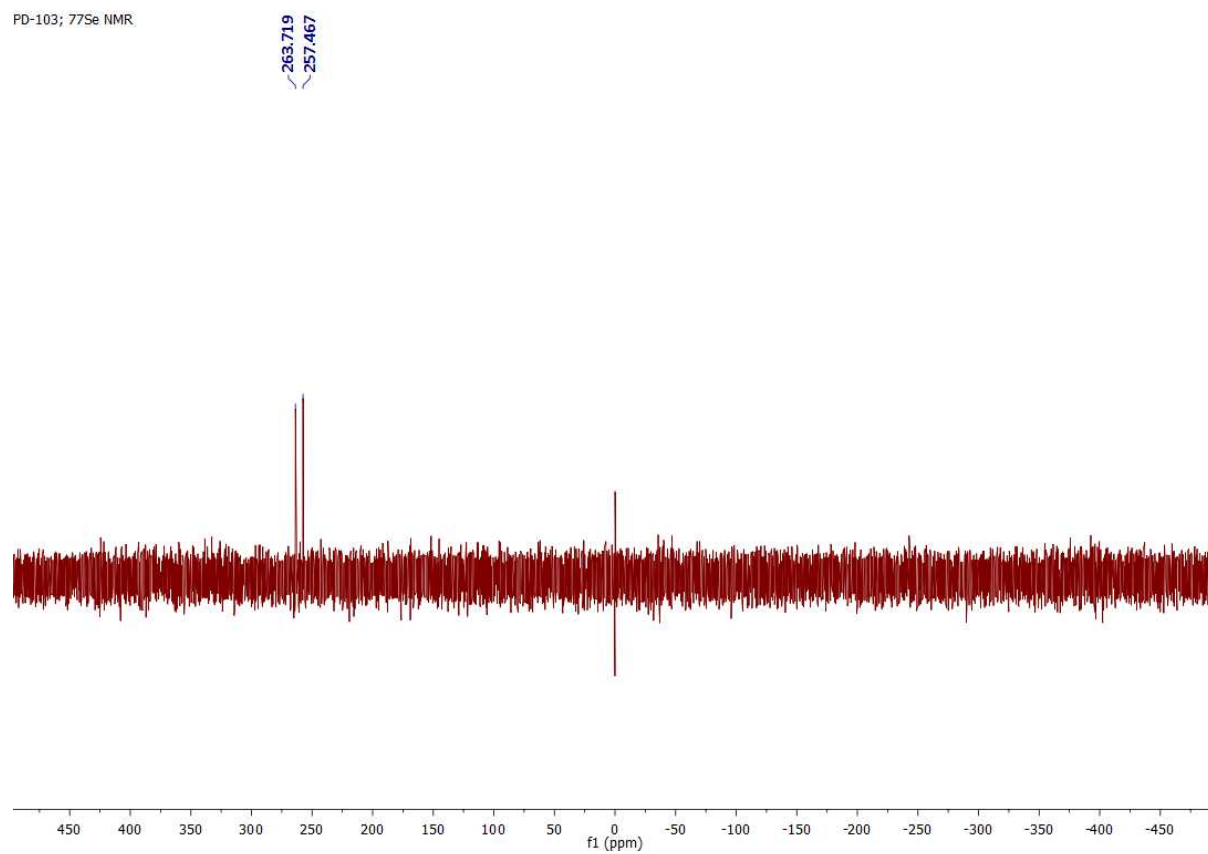

nmr/pd-106-h  
PD106 1H-NMR in CDCl<sub>3</sub>

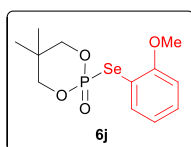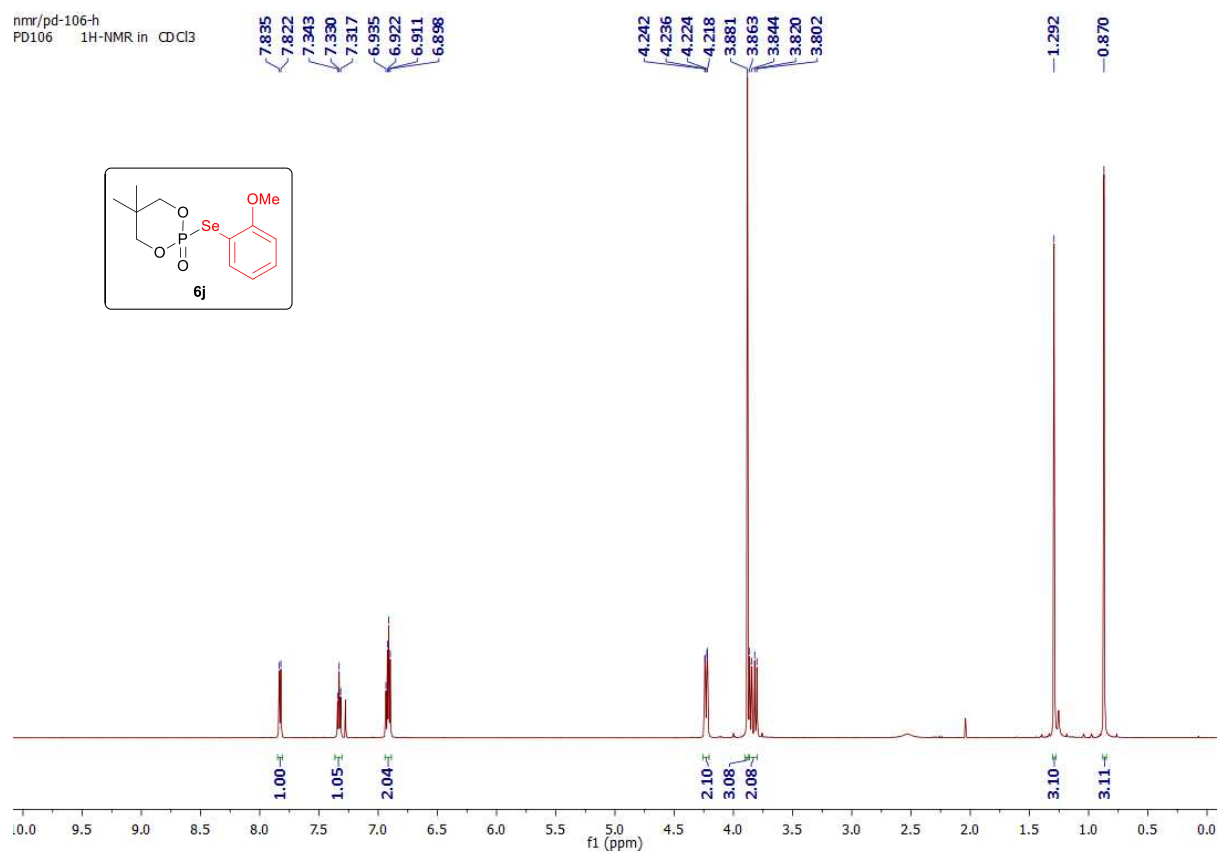

nmr/pd-106-c  
PD106 13C-NMR in CDCl<sub>3</sub>

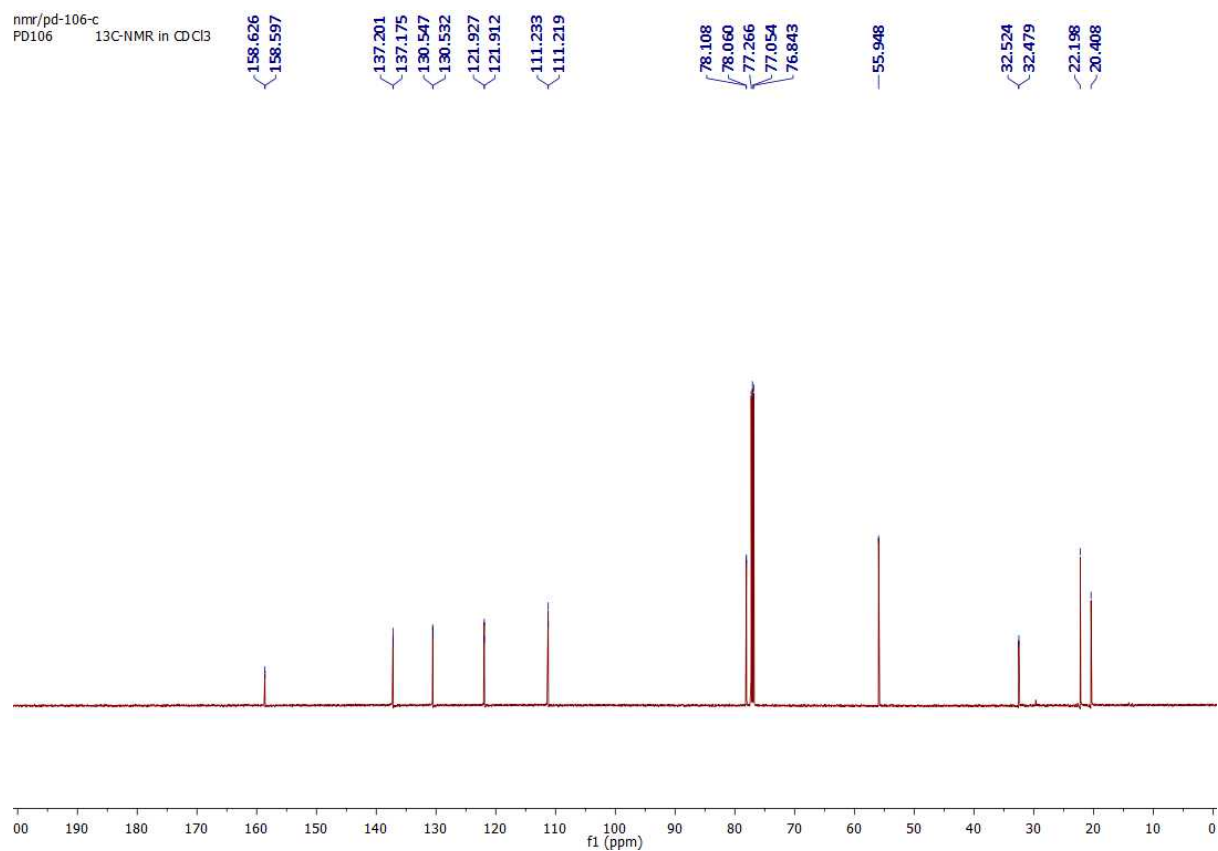

SK-PD-106-31P/1  
SK-PD-106-31P  
1H De-Coupled

-9.57

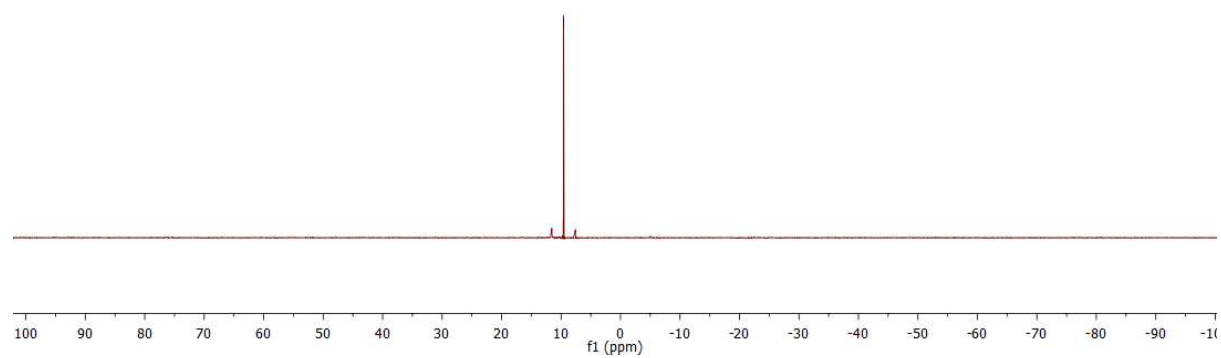

PD-106; 77Se NMR

174.295  
167.925

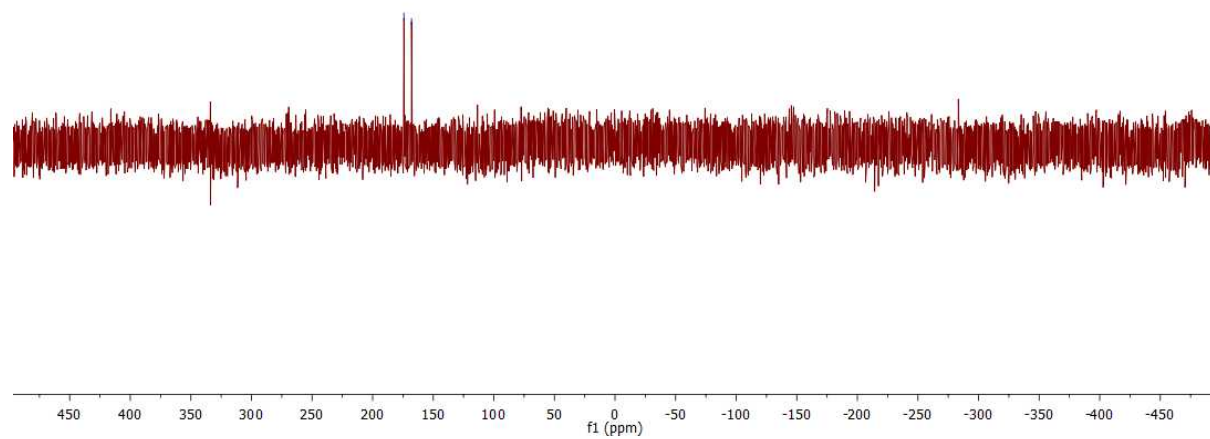

seleno phospho NMR/pd-87-  
PD-87 1H-NMR in CDCl<sub>3</sub>

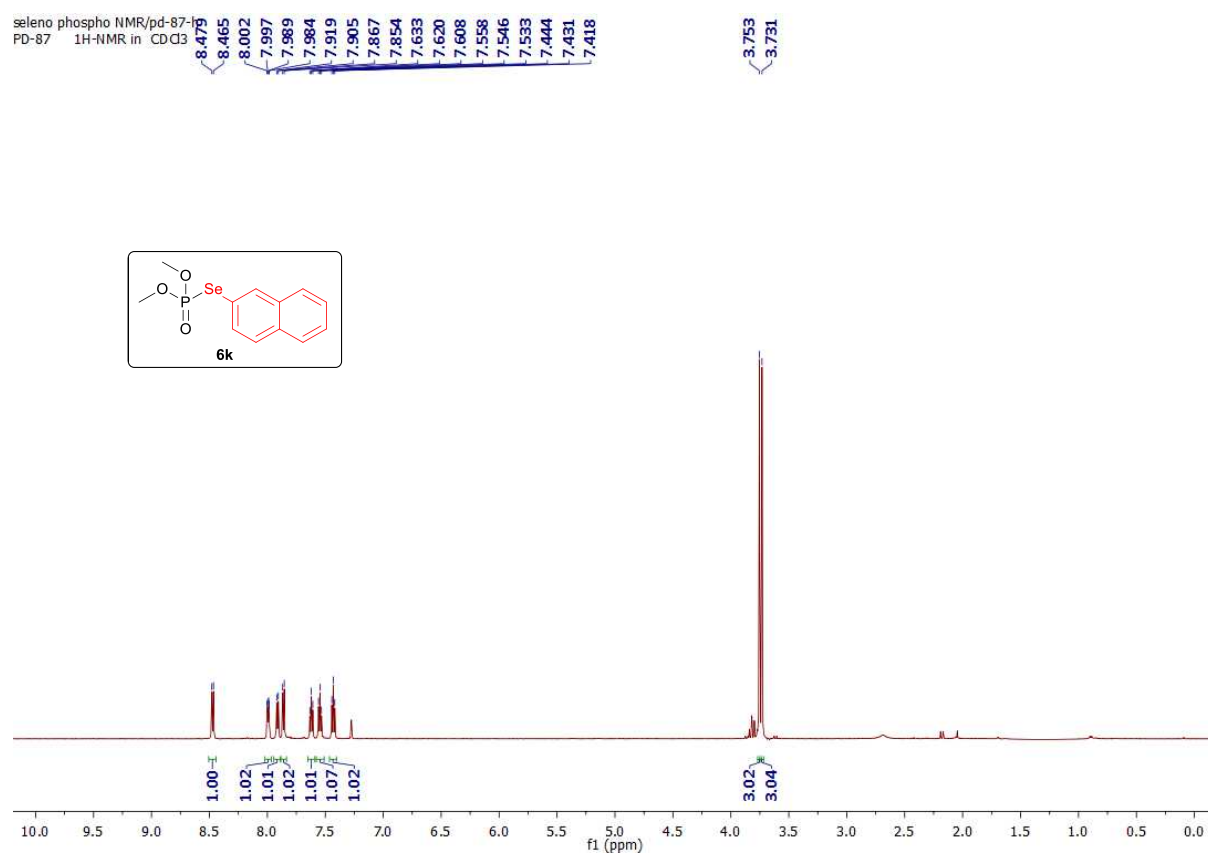

nmr/pd-87-c  
PD-87 13C-NMR in CDCl<sub>3</sub>

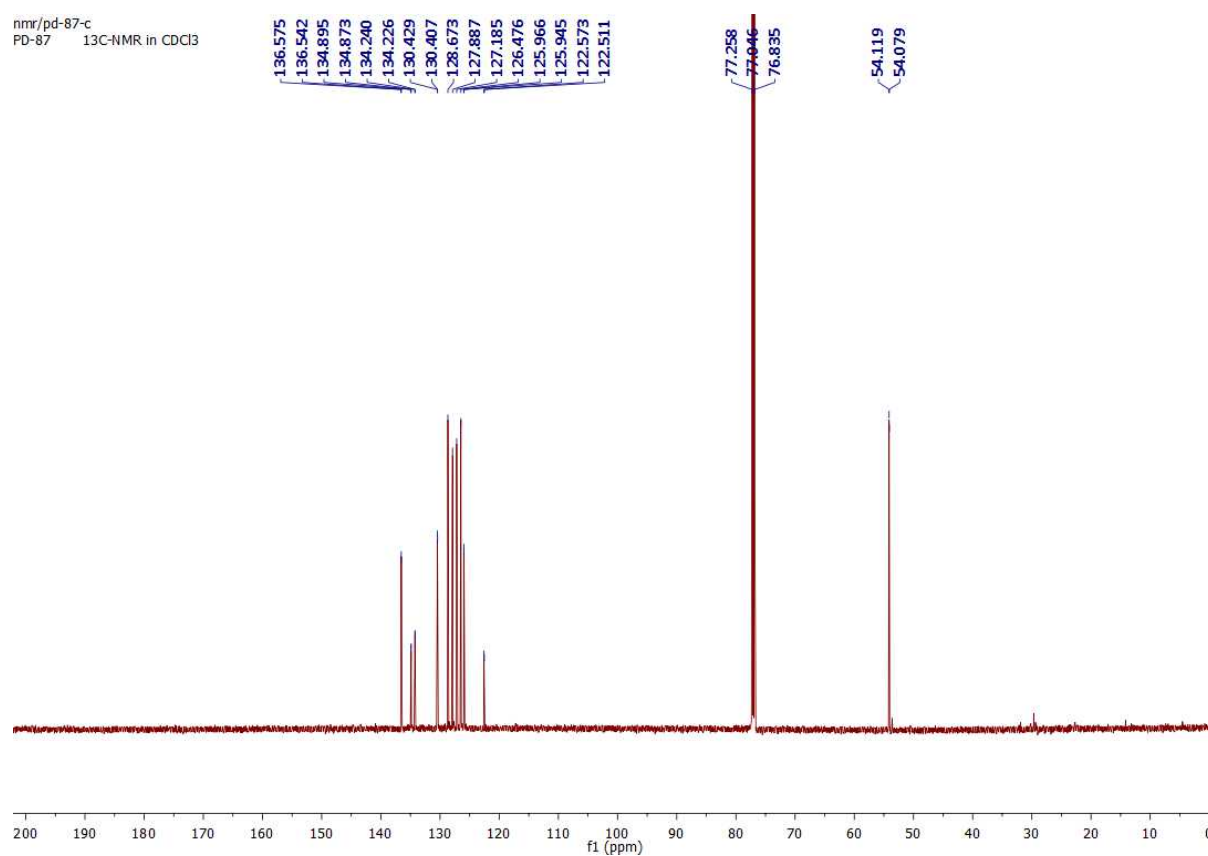

SK-PD-87-31P/1  
SK-PD-87-31P  
1H De-Coupled

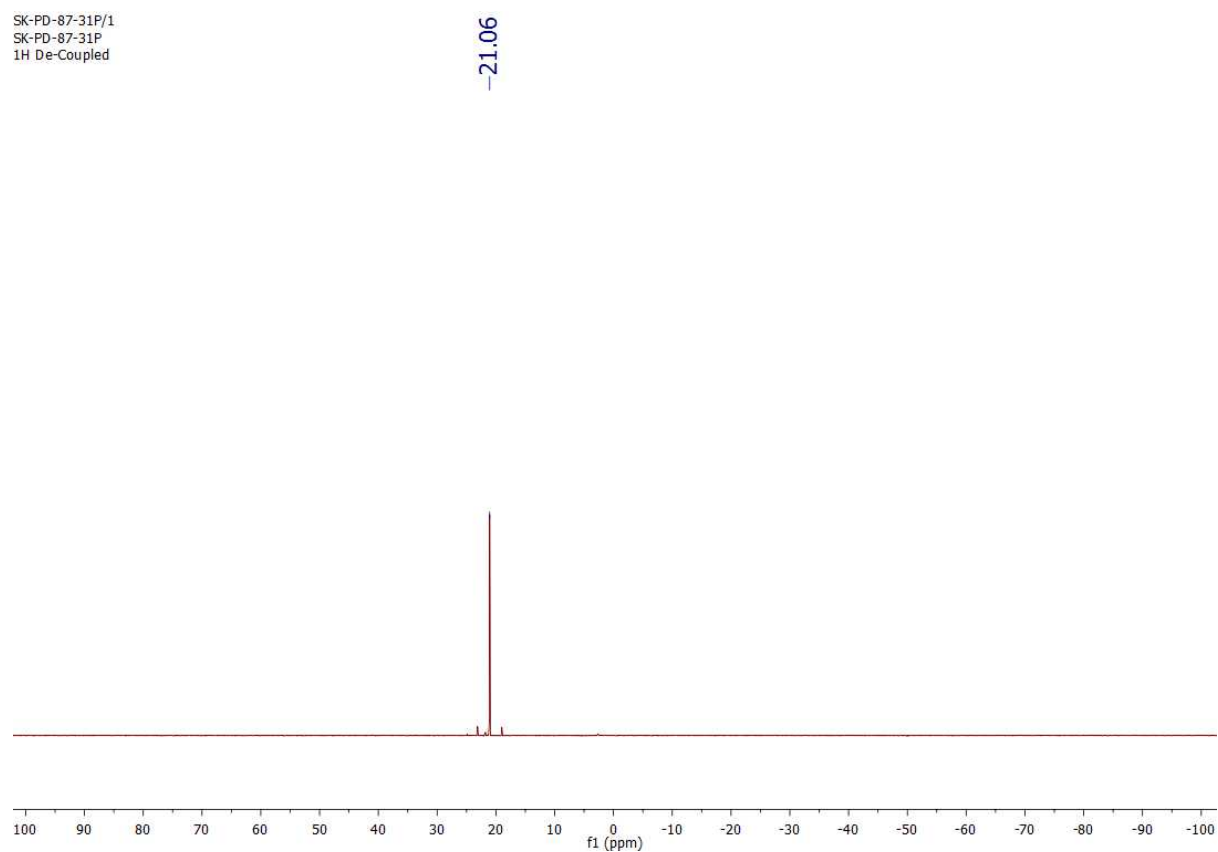

PD-87; 77Se

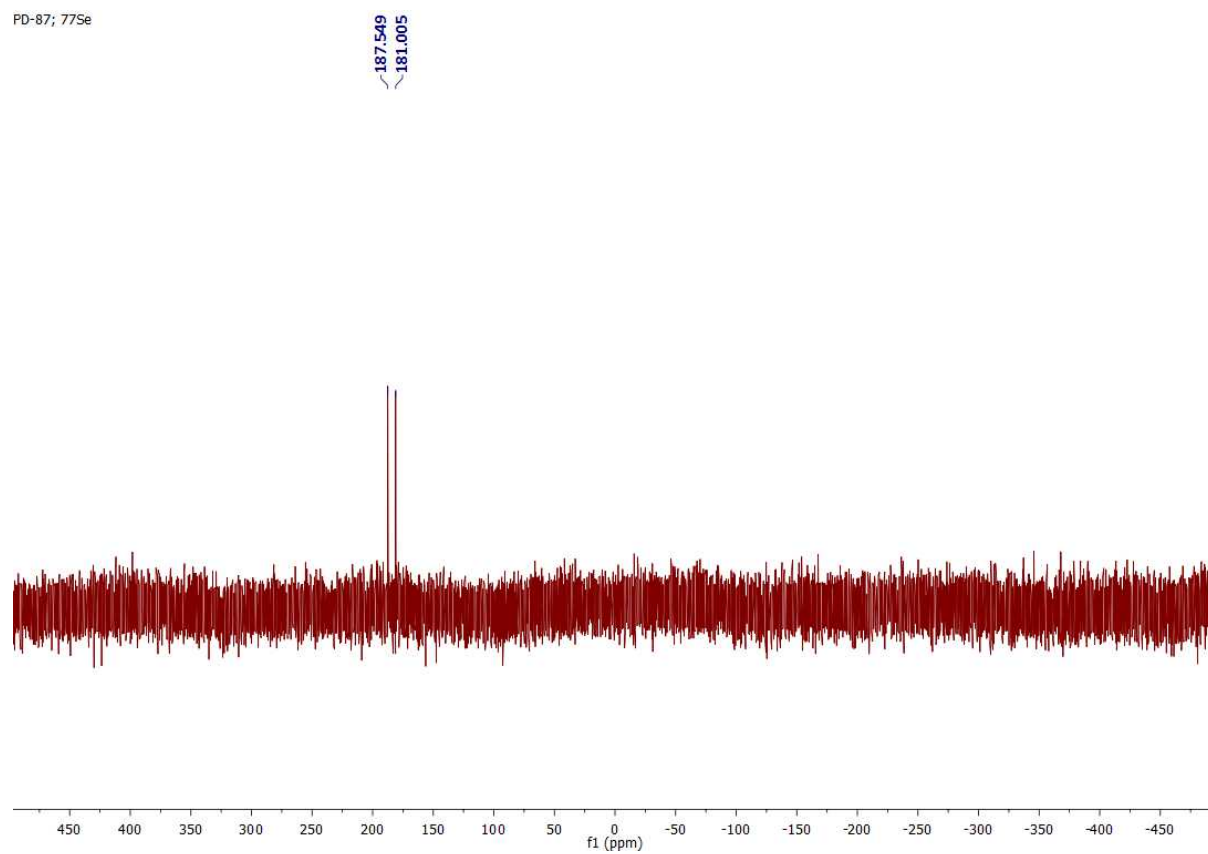



nmr/pd-86-h  
PD86 1H-NMR in CDCl<sub>3</sub>

7.580  
7.577  
7.565  
7.563  
7.307  
7.293

3.816  
3.794

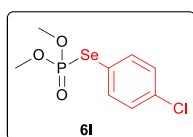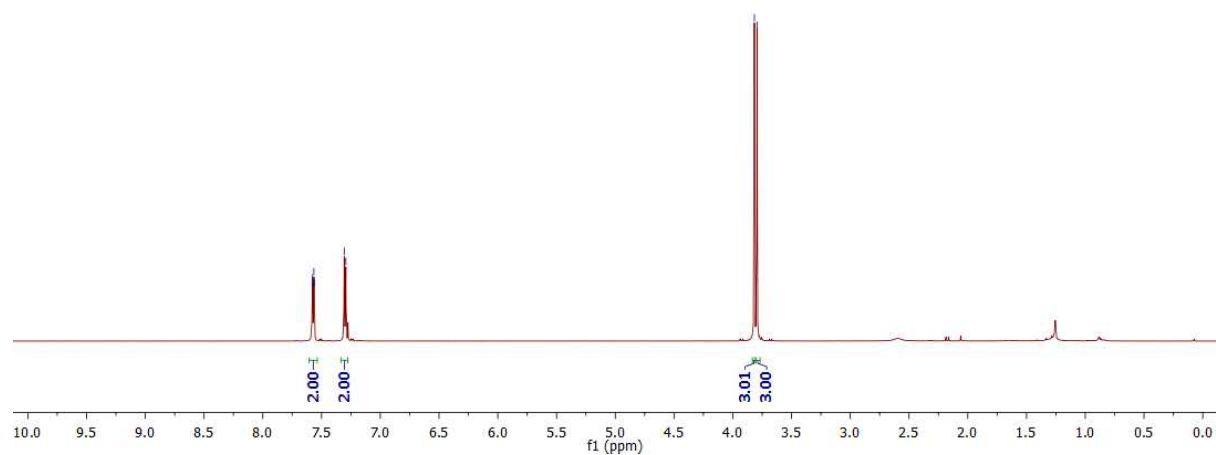

nmr/pd-86-c  
PD86 13C-NMR in CDCl<sub>3</sub>

136.866  
136.834  
135.546  
135.525  
129.807  
129.790  
121.340  
121.282

54.122  
54.083

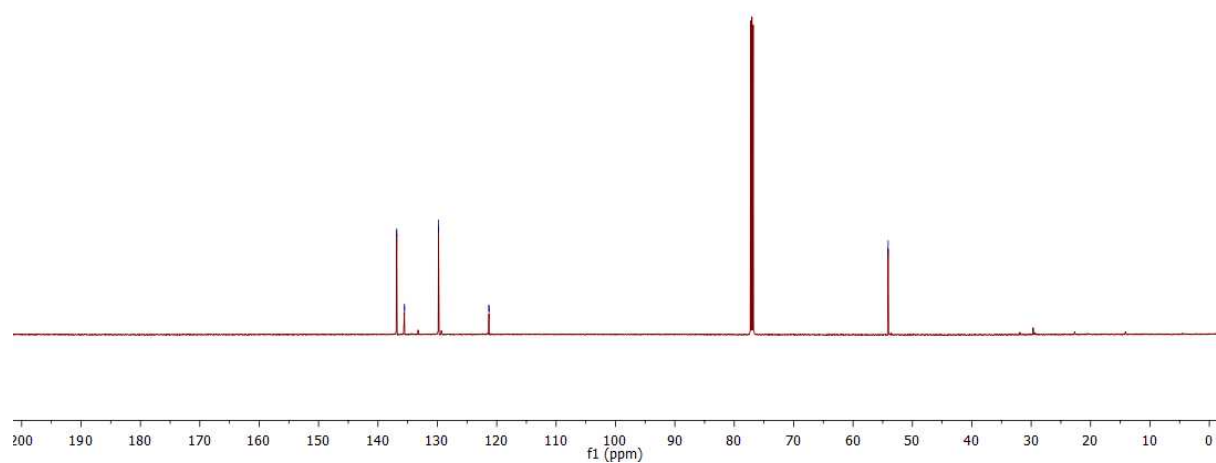

SK-PD-86-31P/1  
SK-PD-86-31P  
1H De-Coupled

-21.17

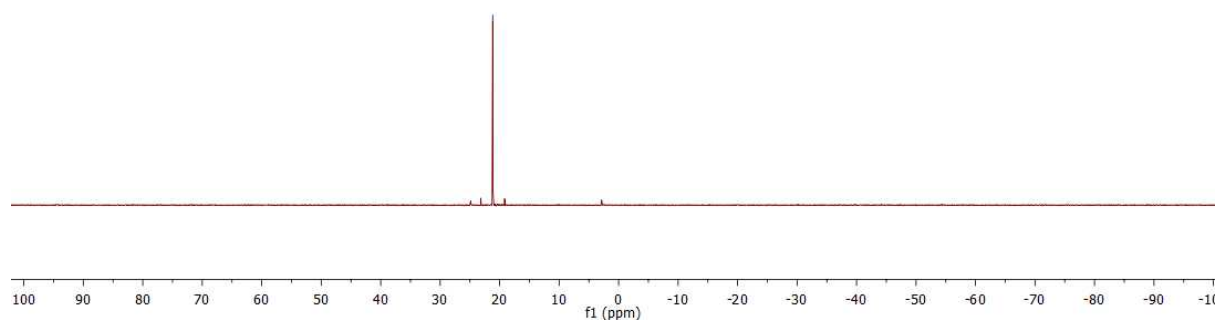

PD-711  
PD-711-1H

7.653, 7.649, 7.645, 7.636, 7.630, 7.626, 7.331, 7.311, 7.296, 7.290, 7.271, 7.258, 7.249, 4.801, 4.786, 4.774, 4.755, 4.739, 4.731, 4.716, 1.319, 1.303, 1.234, 1.219

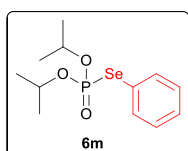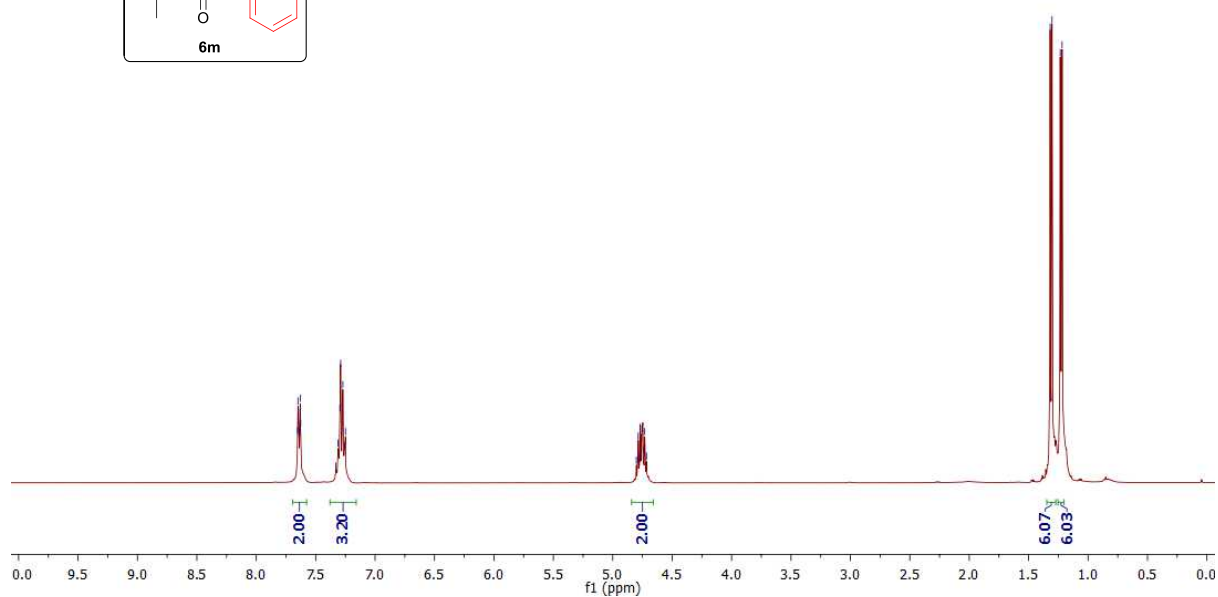

PD-711  
PD-711-13C

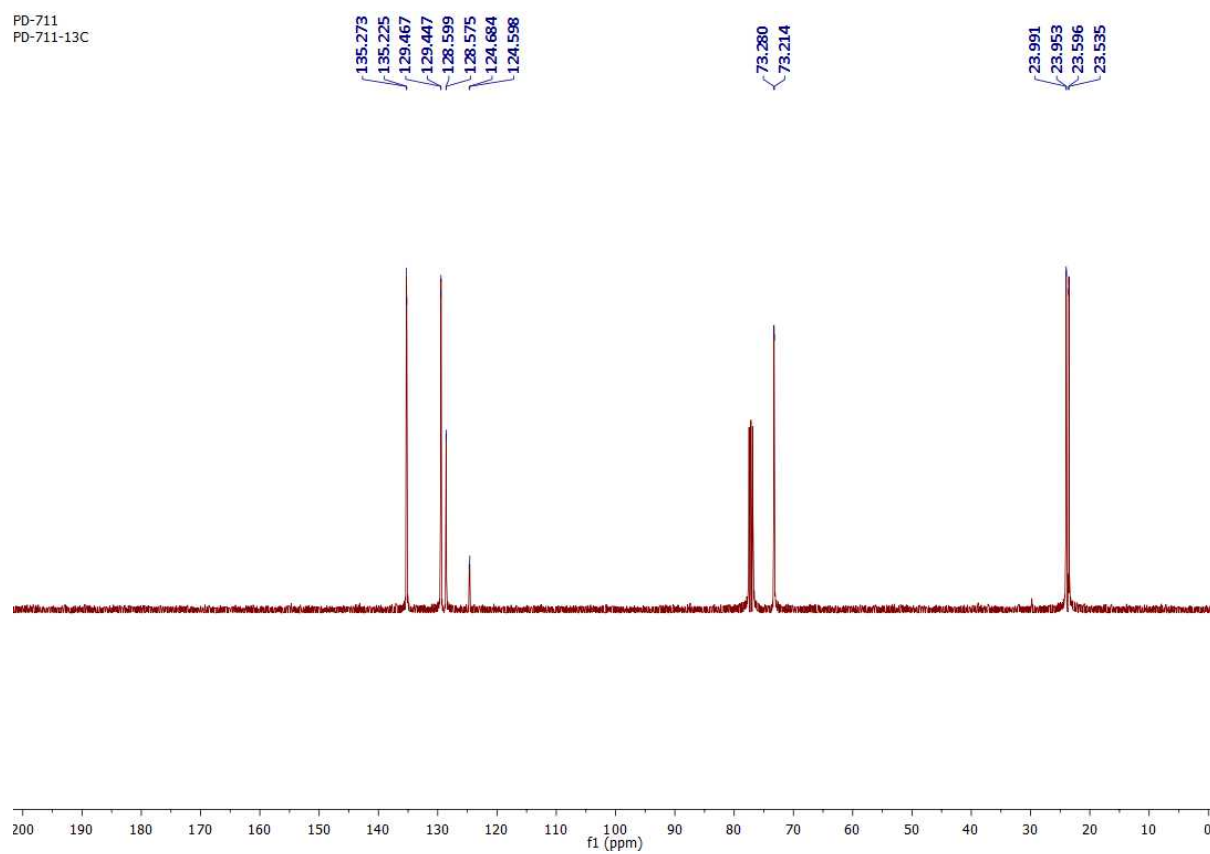

PD-711  
PD-711-31P

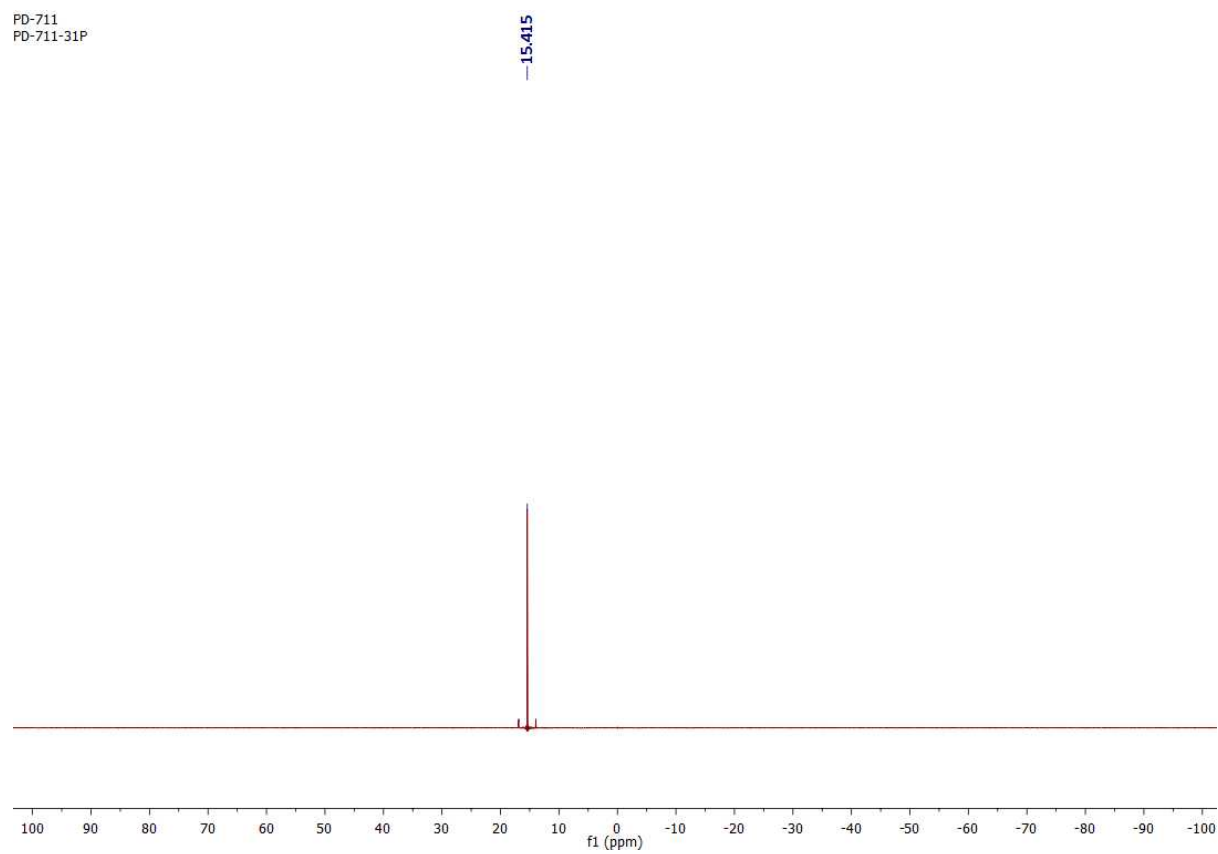

nmr/pd-100-h  
PD100 1H-NMR in CDCl<sub>3</sub>

7.609  
7.606  
7.595  
7.592  
7.289  
7.275

4.812  
4.806  
4.801  
4.796  
4.791  
4.786  
4.781  
4.775  
4.770  
4.765  
4.760  
4.755

1.350  
1.339  
1.283  
1.272

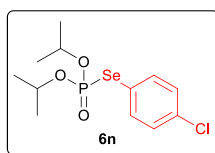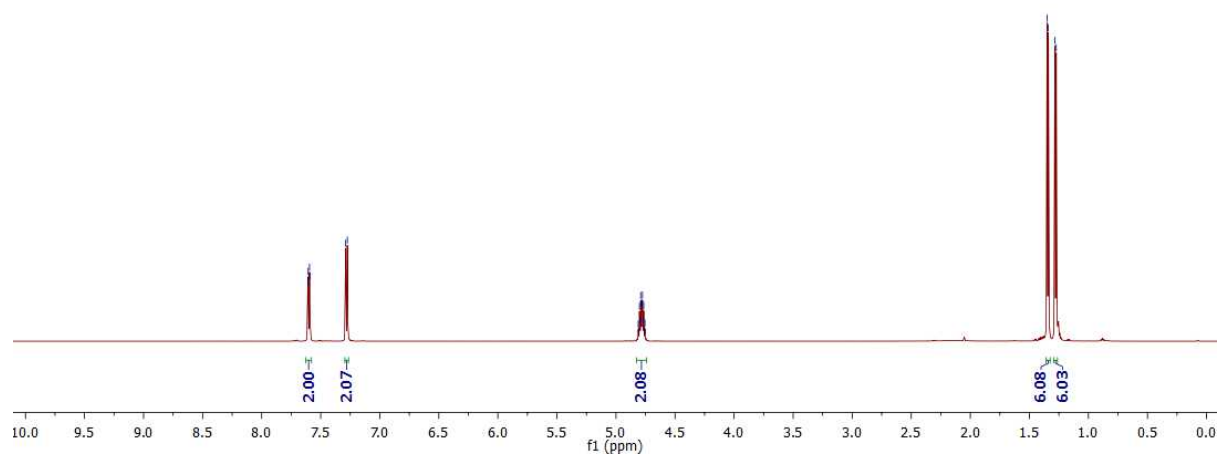

nmr/pd-100-c  
PD100 13C-NMR in CDCl<sub>3</sub>

136.416  
136.384  
134.968  
134.950  
129.515  
129.502  
122.727  
122.671

73.376  
73.332

23.849  
23.824  
23.511  
23.473

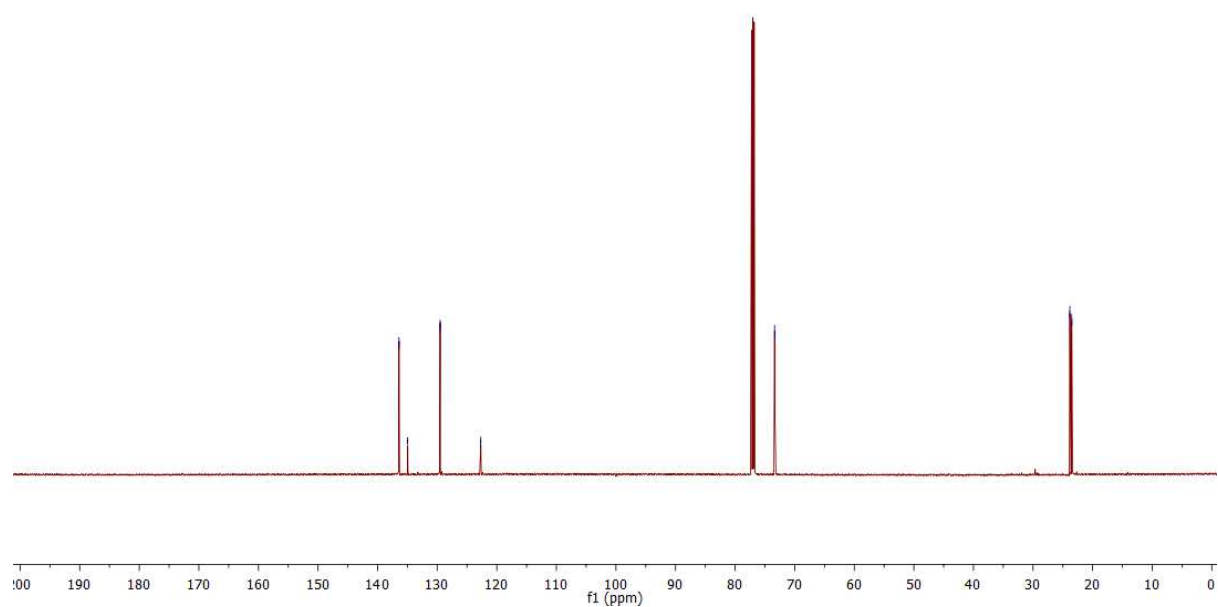

SK-PD-100-31P/1  
SK-PD-100-31P  
1H De-Coupled

-13.88

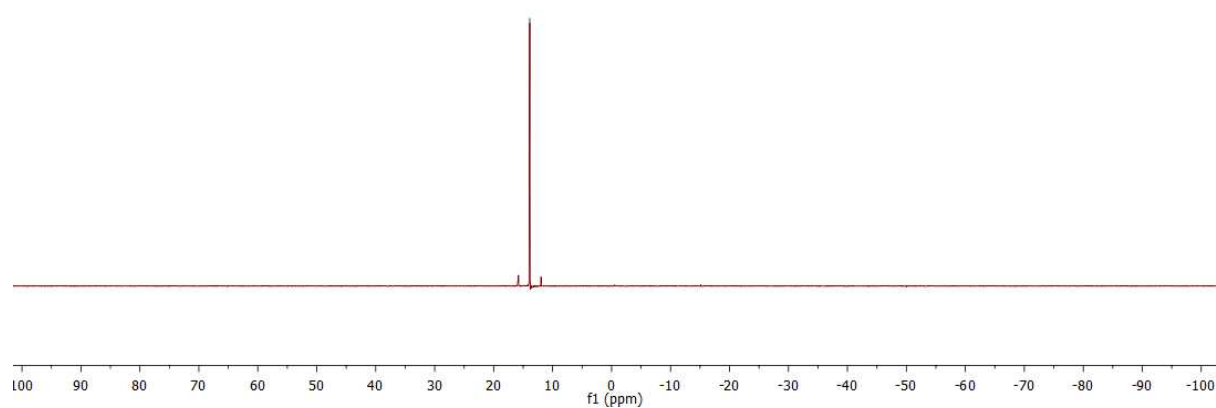

seleno phospho NMR/pd-104  
PD-104 1H-NMR in CDCl3

7.854  
7.654  
7.649  
7.646  
7.643  
7.639  
7.634  
7.631  
7.027  
7.012  
6.998

4.803  
4.798  
4.793  
4.788  
4.782  
4.777  
4.772  
4.767  
4.762  
4.757  
4.751  
4.746

1.342  
1.332  
1.279  
1.268

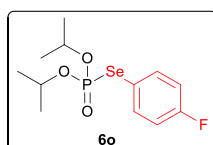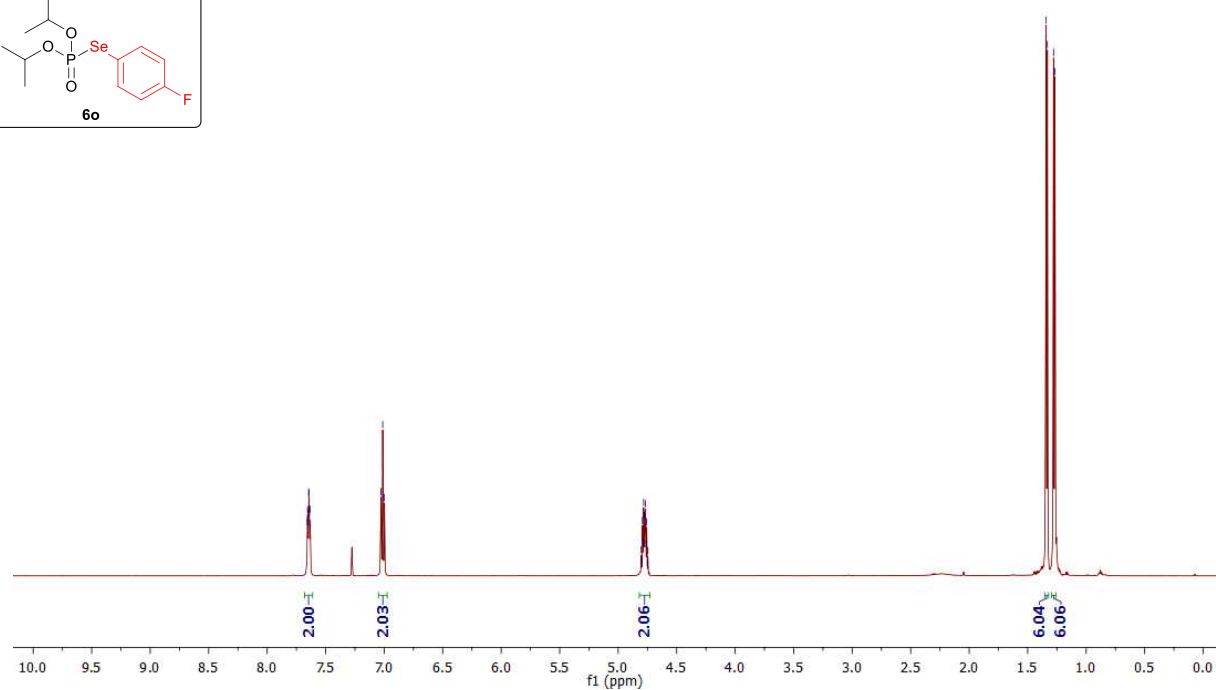

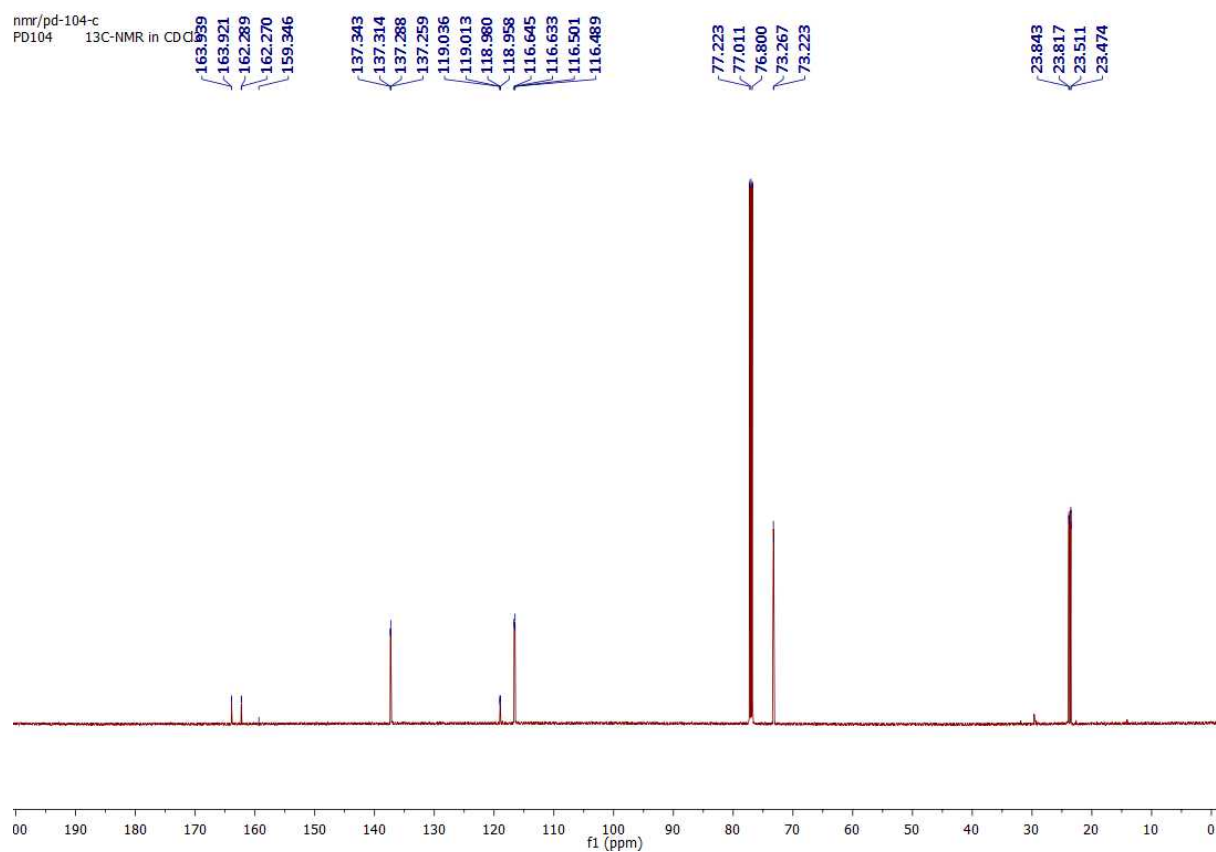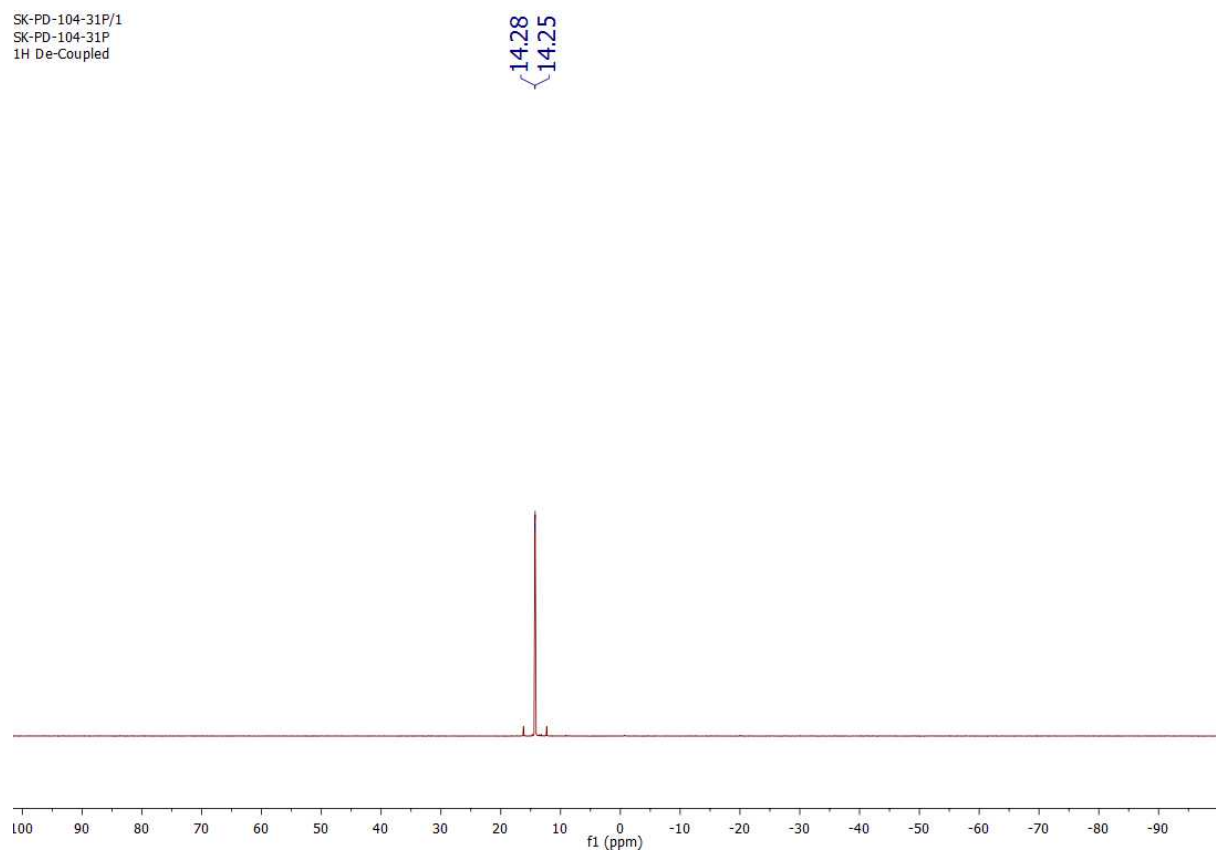

seleno phospho NMR/pd-89-h  
PD-89 1H-NMR in CDCl<sub>3</sub>

7.900  
7.862  
7.849  
7.643  
7.630  
7.479  
7.466  
7.453

3.835  
3.813

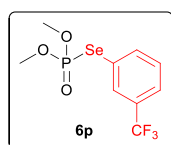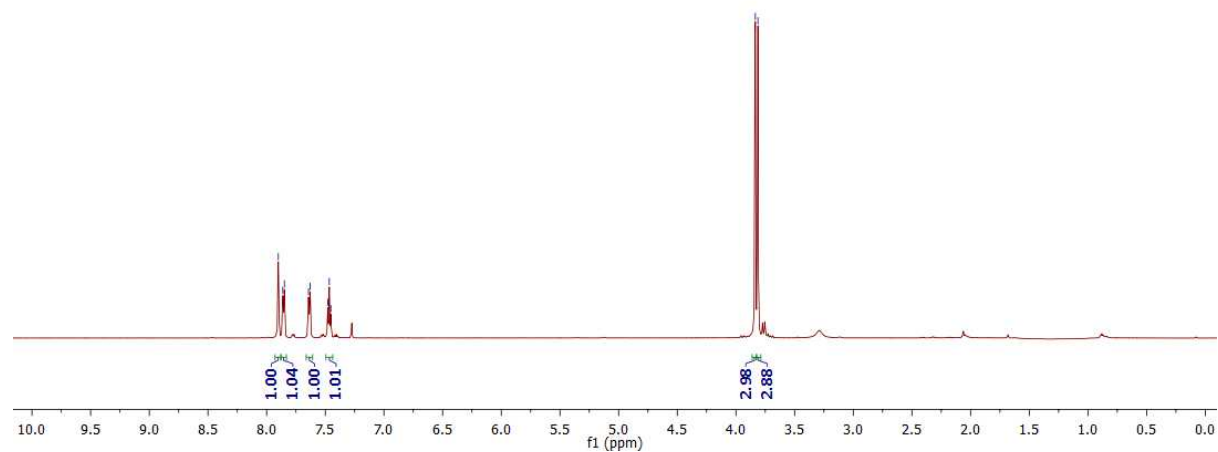

nmr/pd-89-c  
PD-89 13C-NMR in CDCl<sub>3</sub>

138.852  
138.824  
132.166  
132.142  
132.113  
132.085  
132.059  
131.874  
131.863  
131.658  
131.647  
129.911  
129.897  
125.770  
125.748  
125.726  
124.396  
124.340  
124.258  
122.451

77.219  
77.007  
76.796

54.196  
54.157

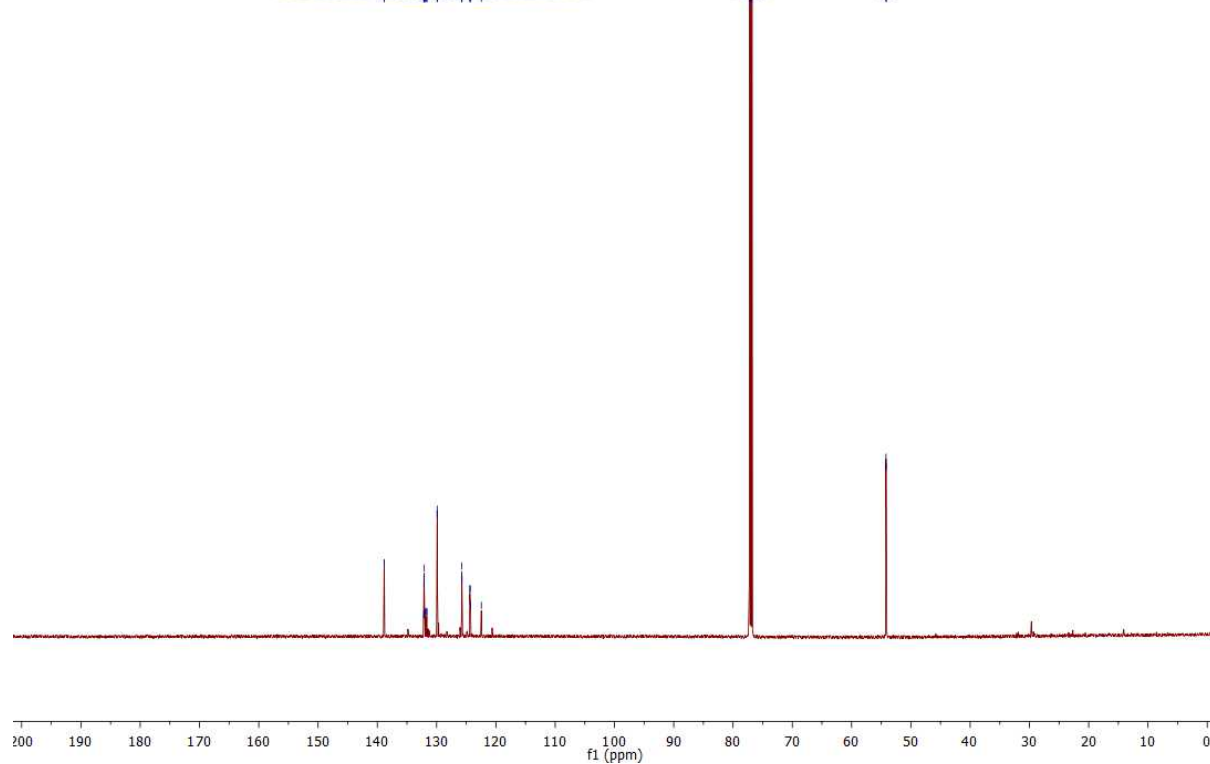

PD-89F  
single pulse decoupled gated NOE

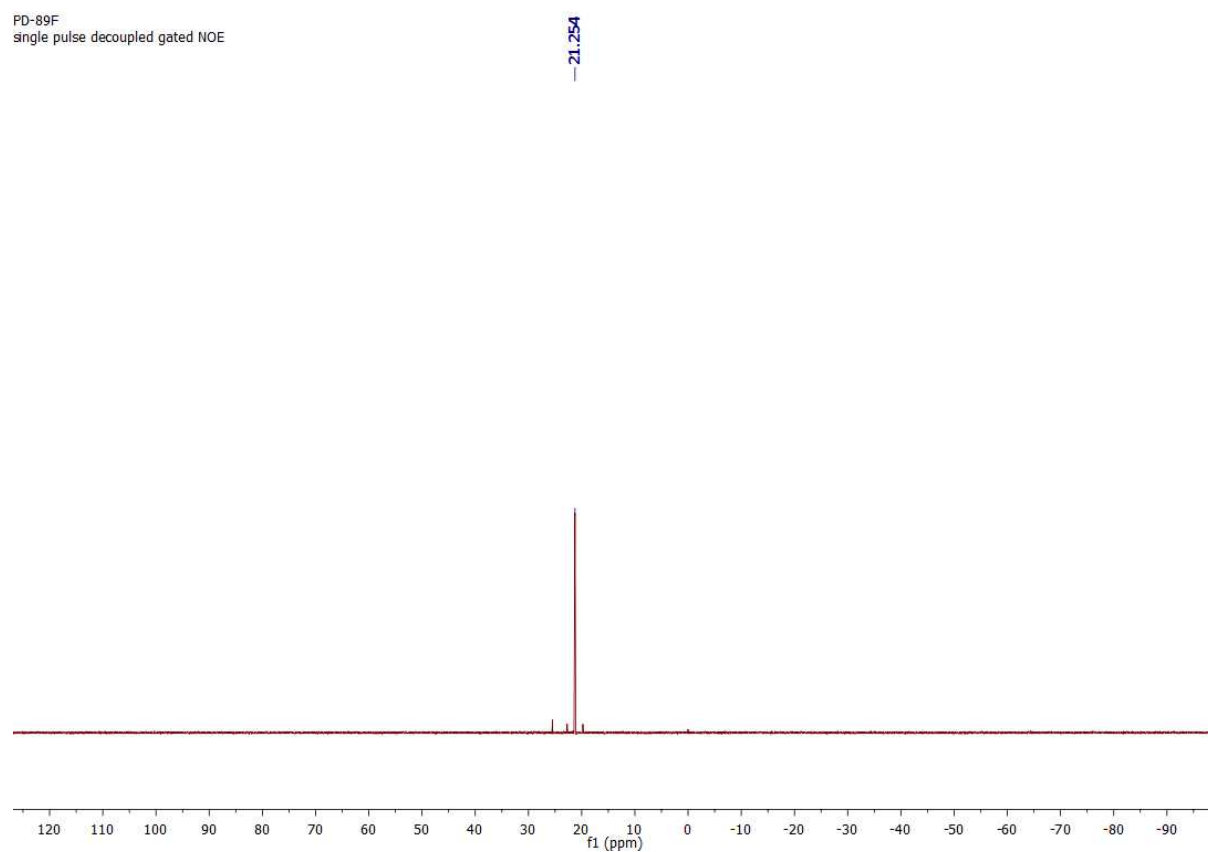

nmr/pd-65-h  
PD65

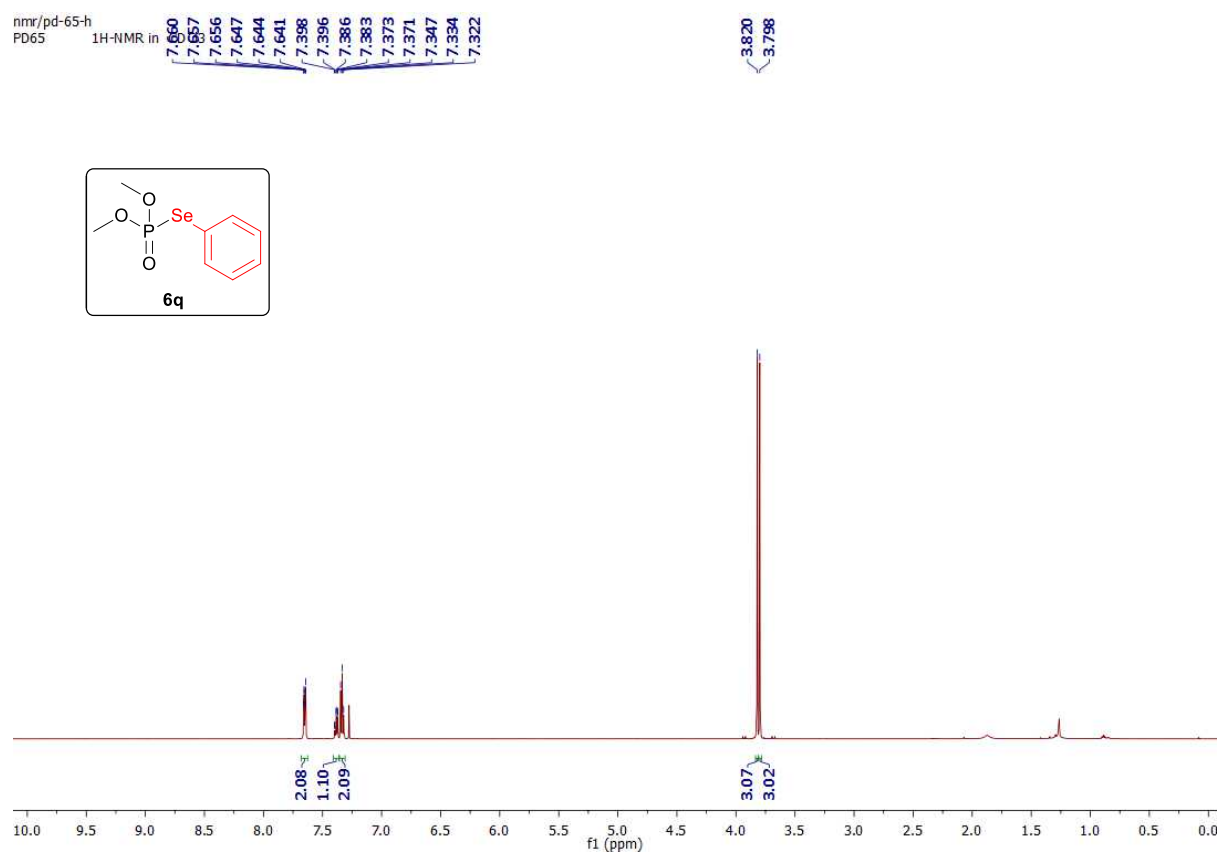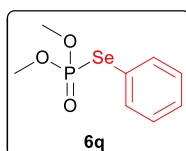



nmr/pd-65-c  
PD65 <sup>13</sup>C-NMR in CDCl<sub>3</sub>

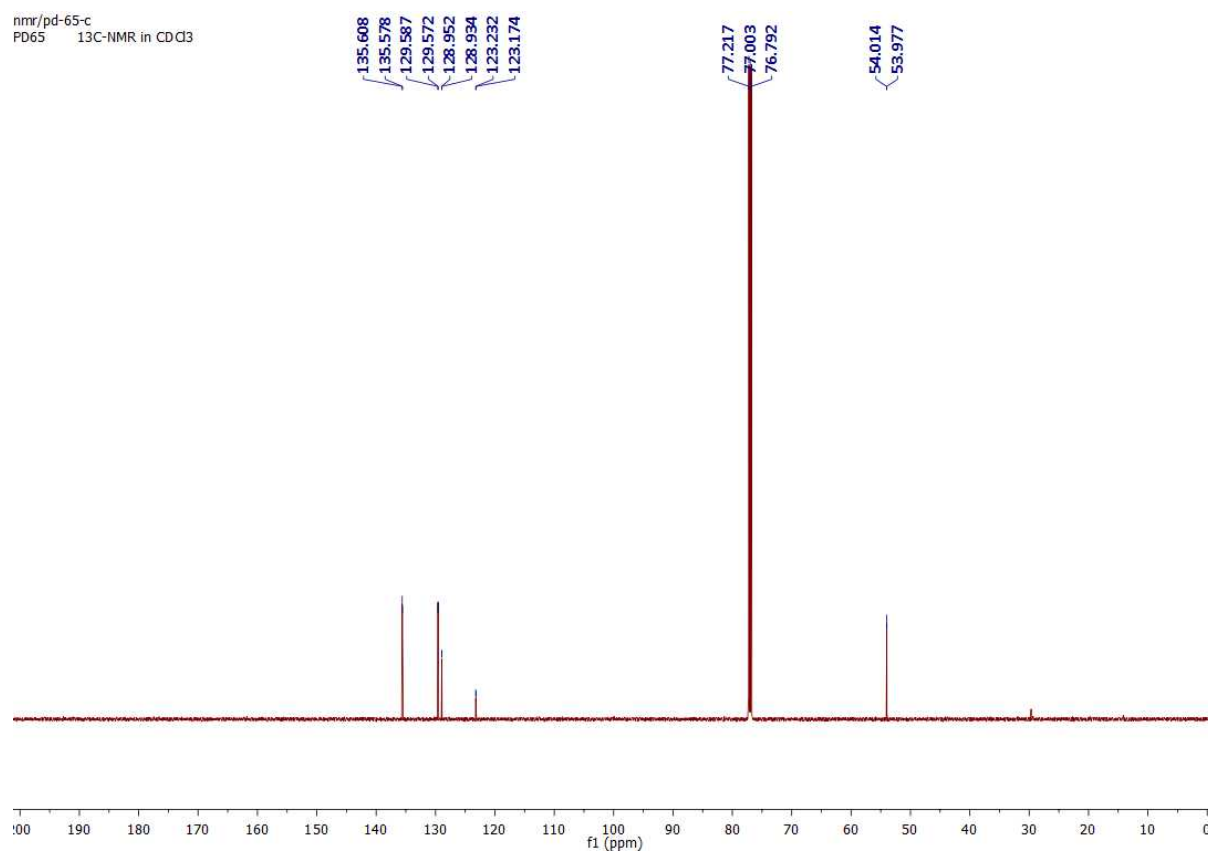

PD-65  
single pulse decoupled gated NOE

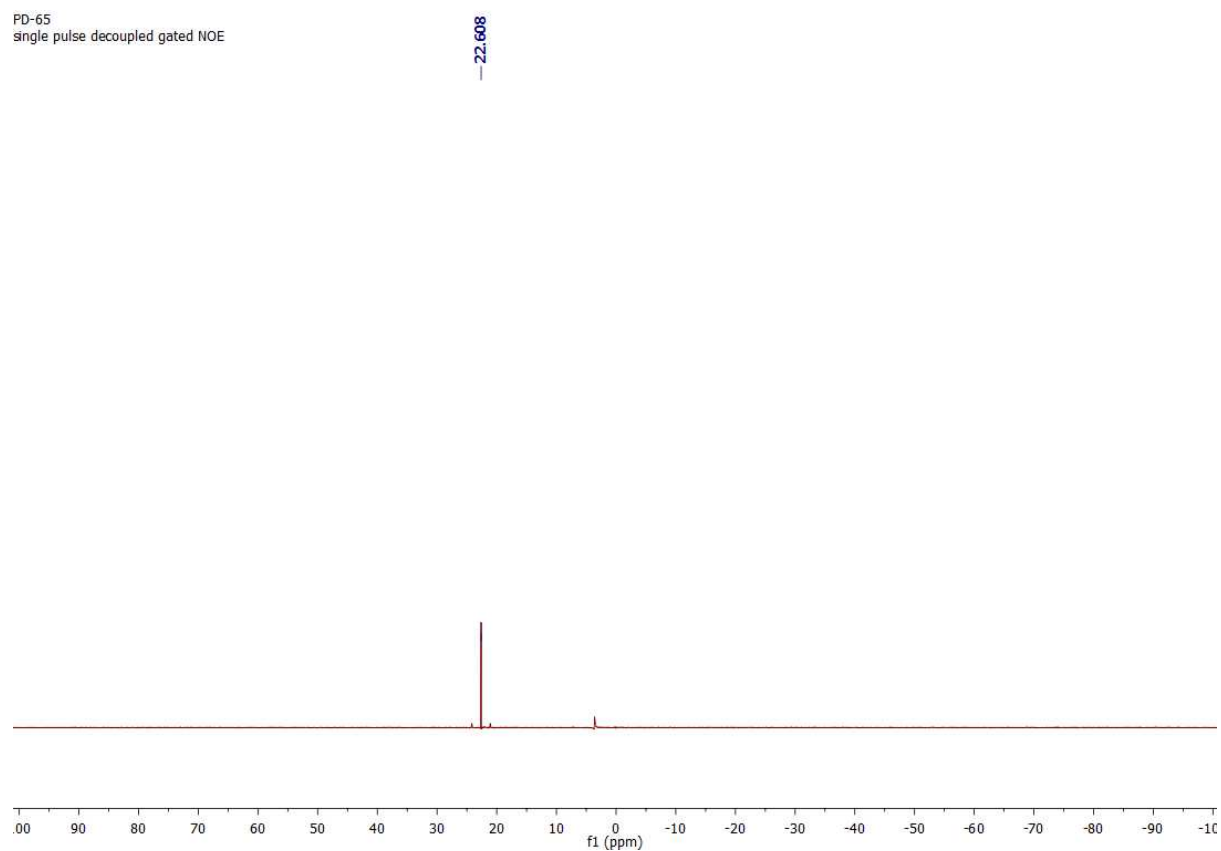

seleno phospho NMR/pd-129-h  
PD-129 <sup>1</sup>H-NMR in CDCl<sub>3</sub>

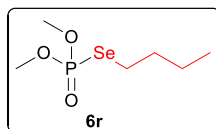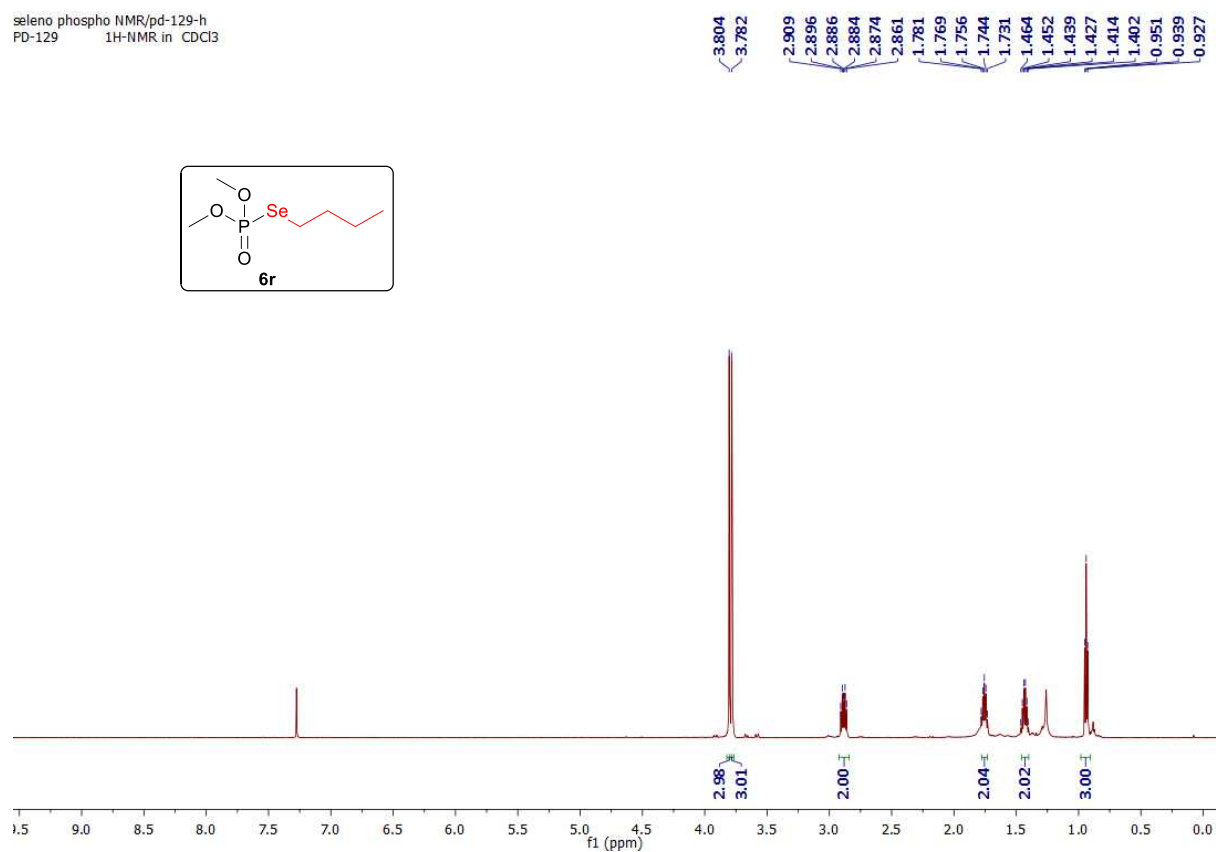

nmr/pd-129-c  
PD-129 <sup>13</sup>C-NMR in CDCl<sub>3</sub>

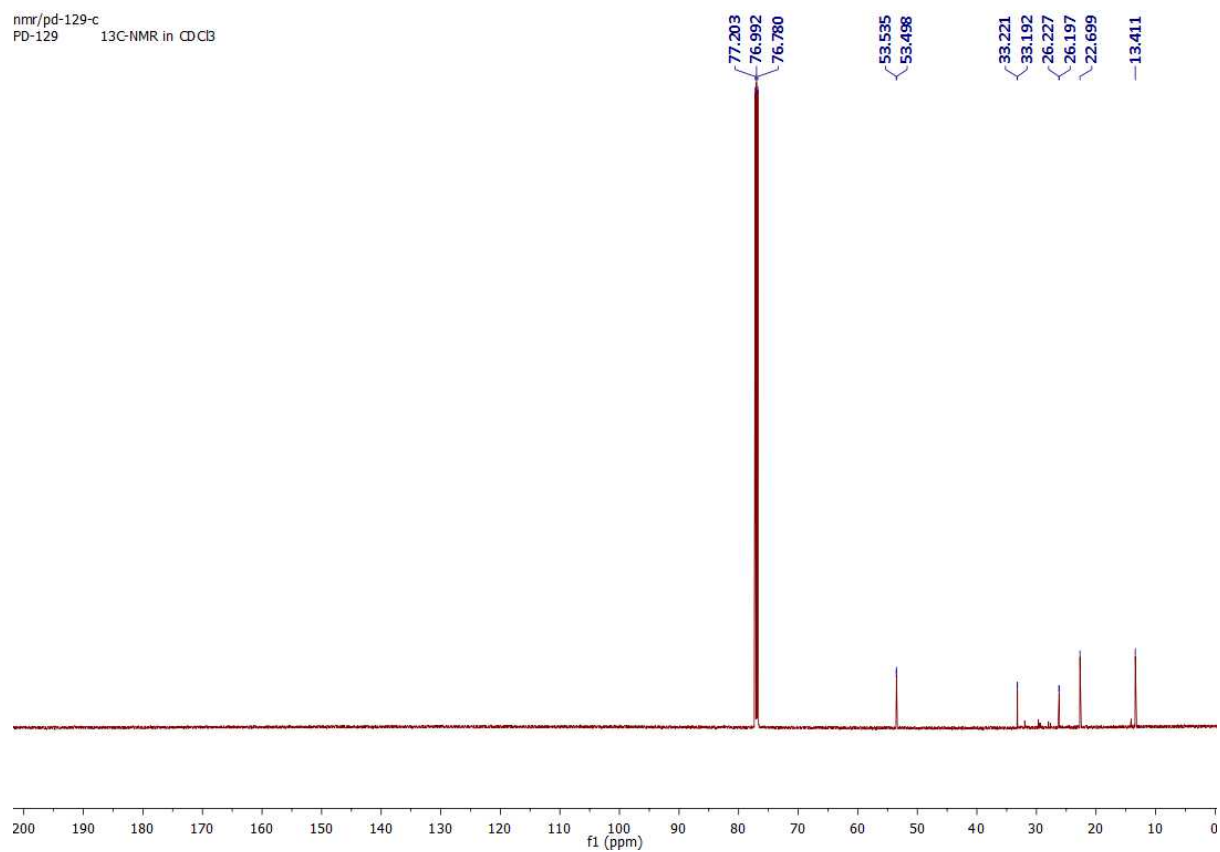

SK-PD-129-31P/1  
SK-PD-129-31P  
1H De-Coupled

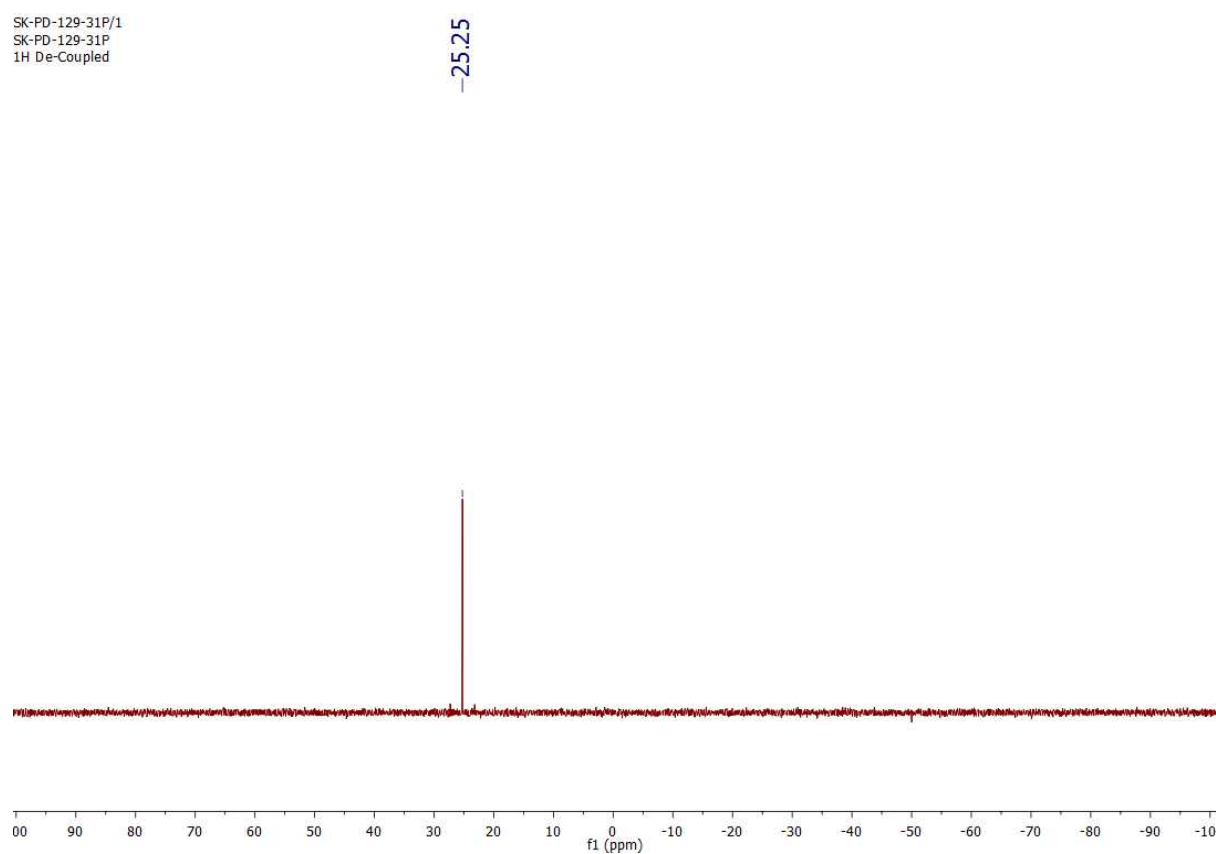

seleno phospho NMR/pd-88-h  
PD-88 1H-NMR in CDCl<sub>3</sub>

7.674  
7.661  
7.357  
7.344  
7.331  
6.929  
6.918  
6.906  
3.886  
3.824  
3.802

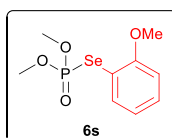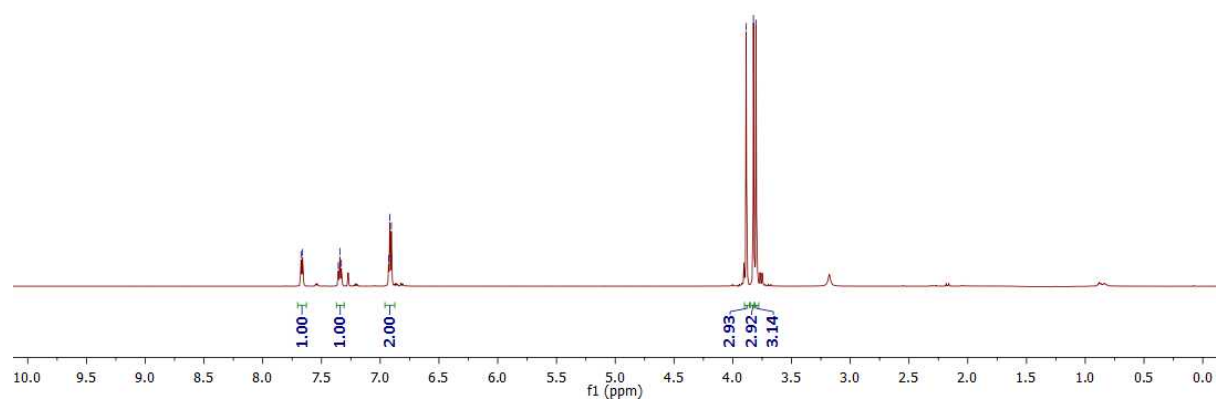

nmr/pd-88-c  
PD-88 <sup>13</sup>C-NMR in CDCl<sub>3</sub>

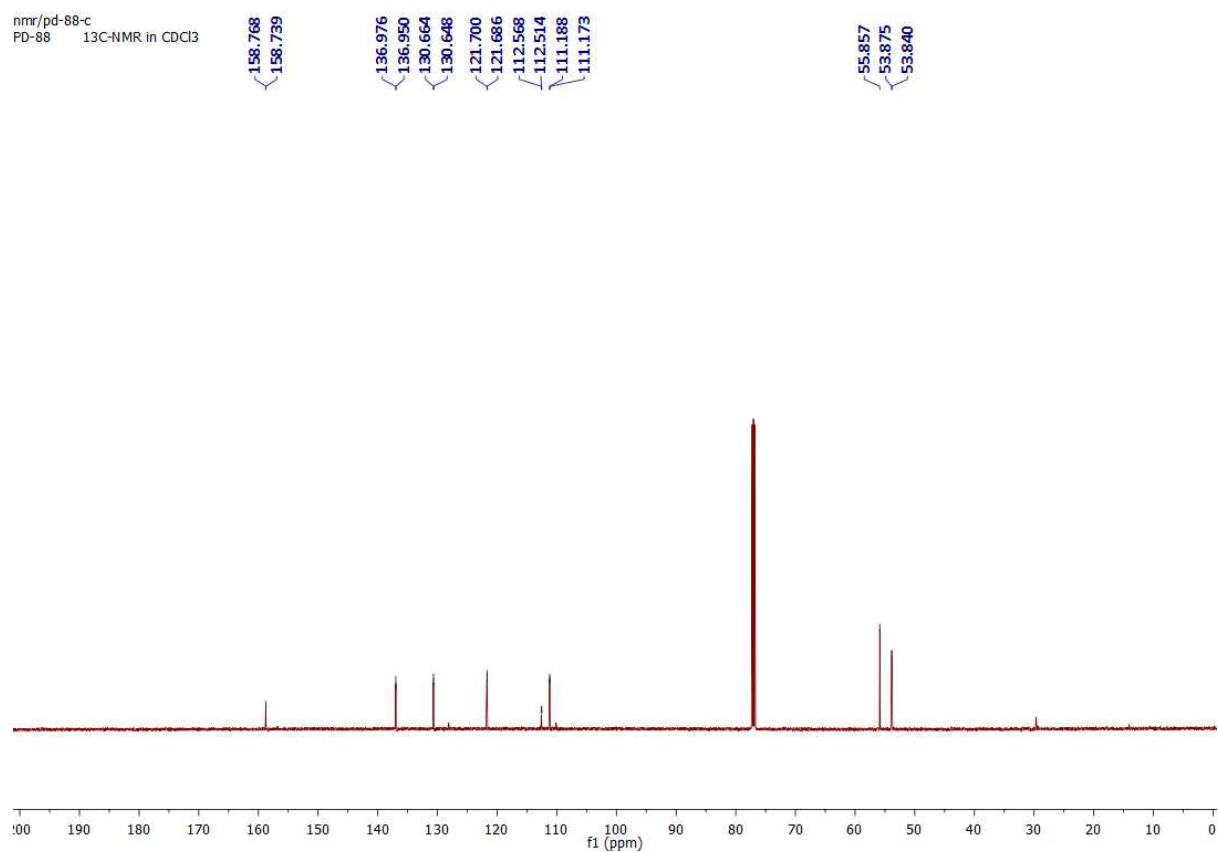

JD-DD-PD-88-31P.1.fid  
JD-DD-PD-88-31P  
1H De-Coupled

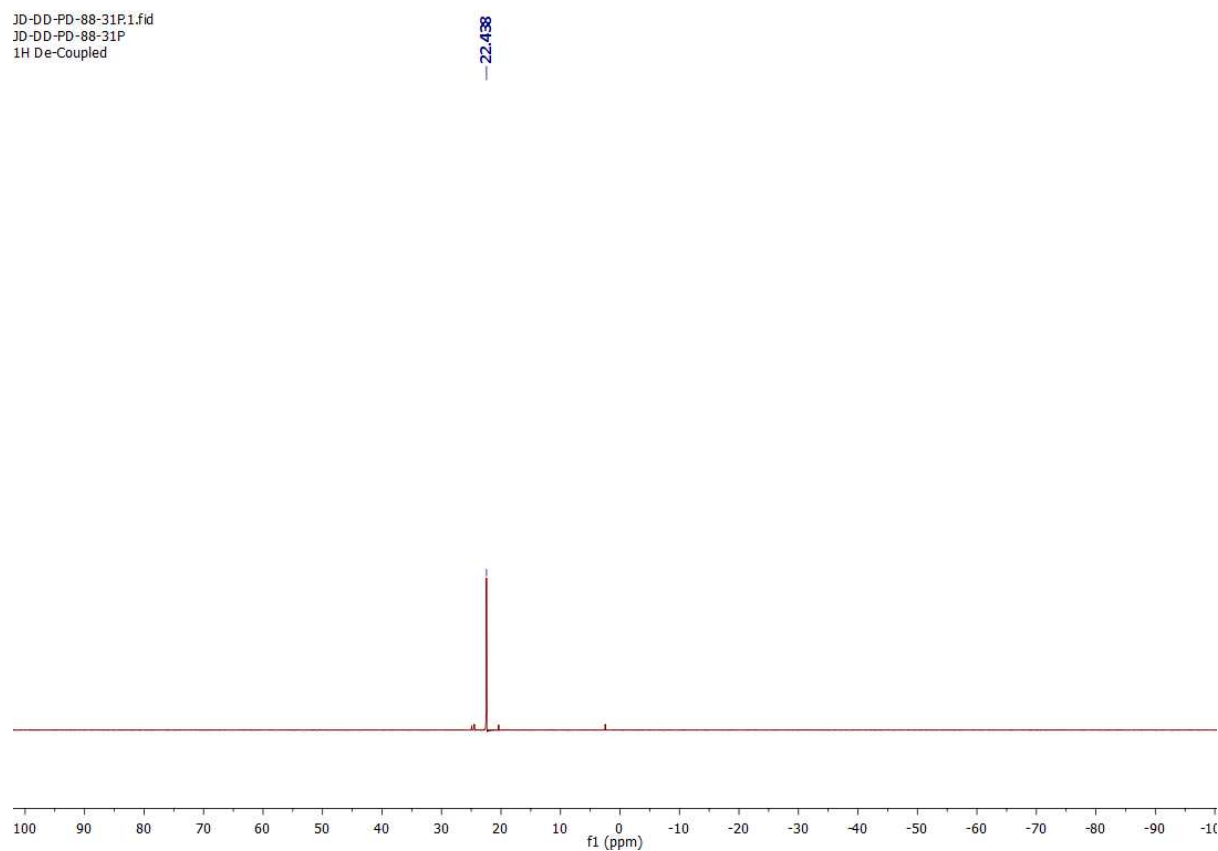

PD-88;  $^{77}\text{Se}$  NMR

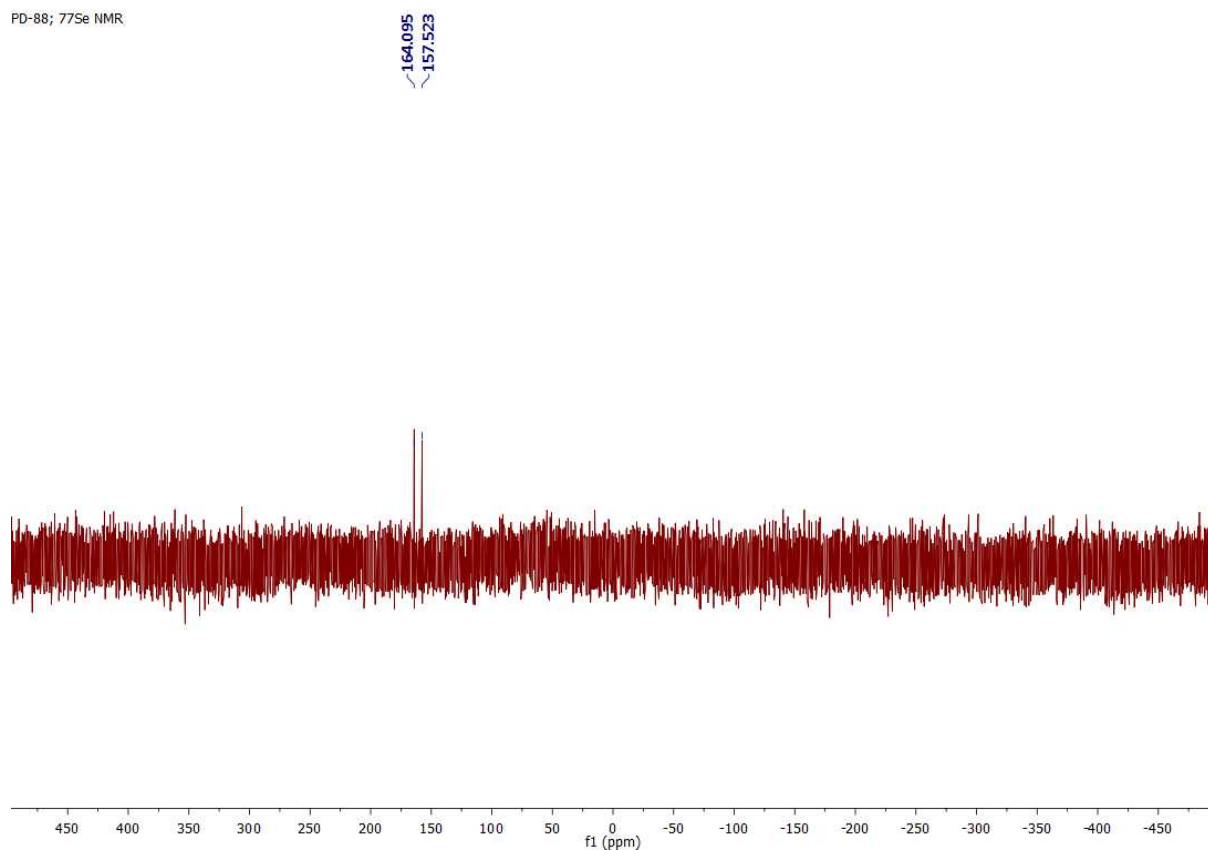

600 MHz selenation NMR/pd-44-h — PD-44

$^1\text{H}$ -NMR in  $\text{CDCl}_3$

7.582, 7.570, 7.372, 7.369, 7.366, 7.360, 7.357, 7.354, 7.349, 7.347, 7.343, 7.338, 7.332, 7.299, 7.291, 7.285, 7.279, 7.276, 7.273, 7.260, 7.248, 5.171, 5.157, 5.152, 5.137, 5.122, 5.118, 5.102

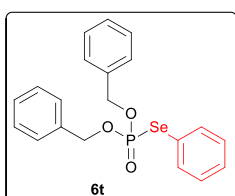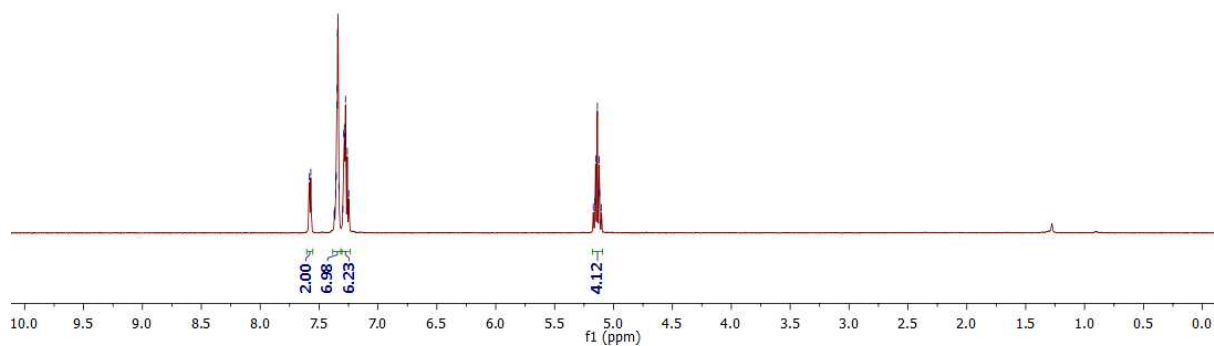

nmr/pd-44-c  
PD-44 <sup>13</sup>C-NMR in CDCl<sub>3</sub>

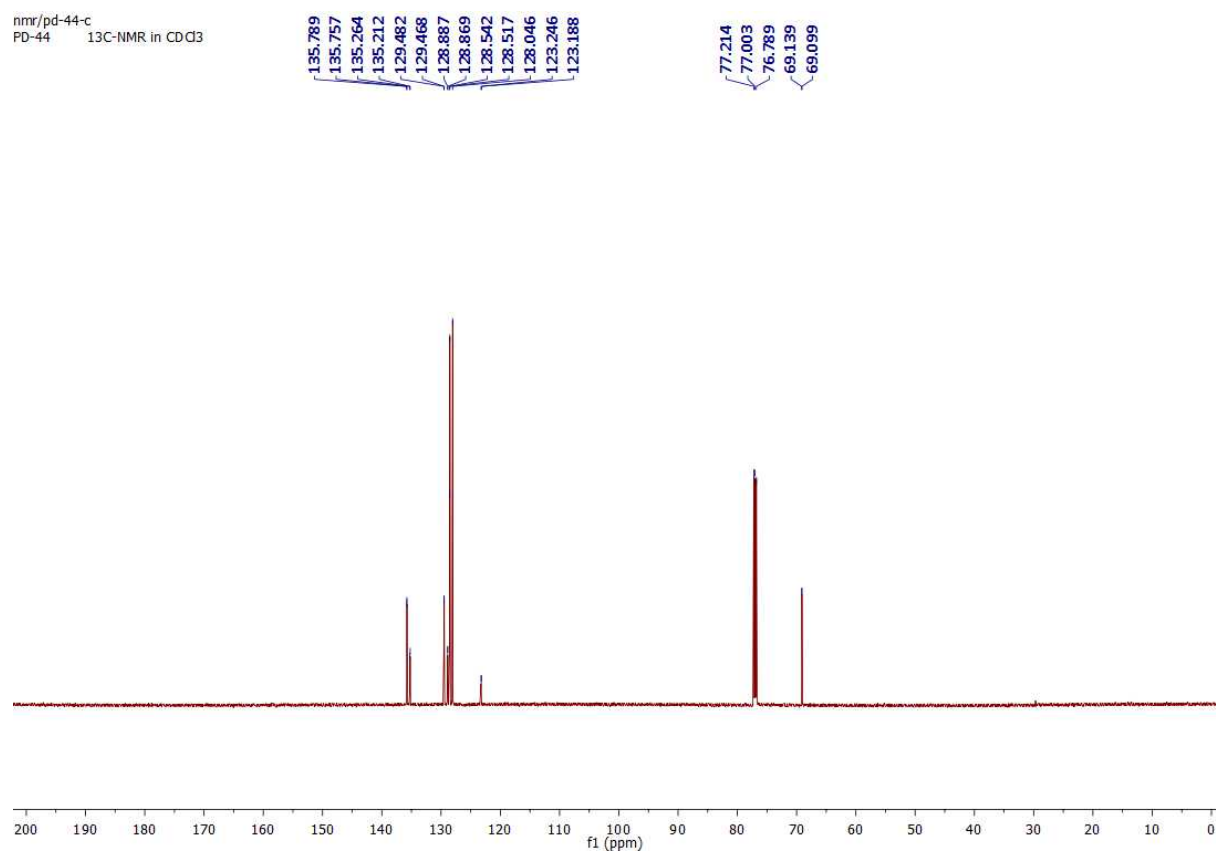

SK-PD-44-31P/1  
SK-PD-44-31P  
1H De-Coupled

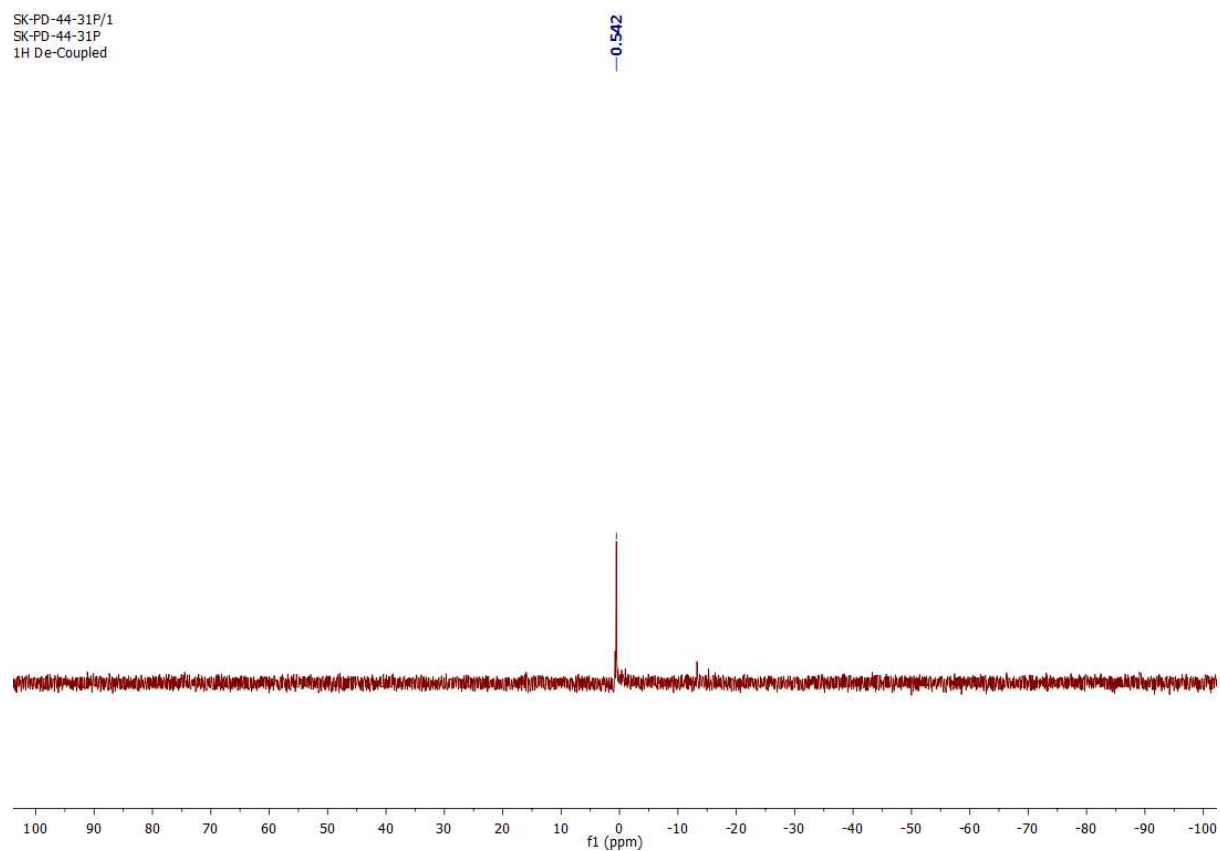

nmr/pd-58-h  
PD58

1H-NMR in CDCl<sub>3</sub>

7.401 7.375 7.364 7.307 7.294 7.283 7.270 7.253 7.242 7.231  
5.131 5.116 5.111 5.097 5.035 5.020 5.016 5.001 4.068 4.047

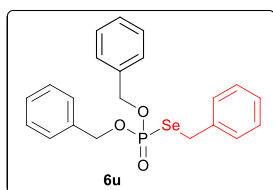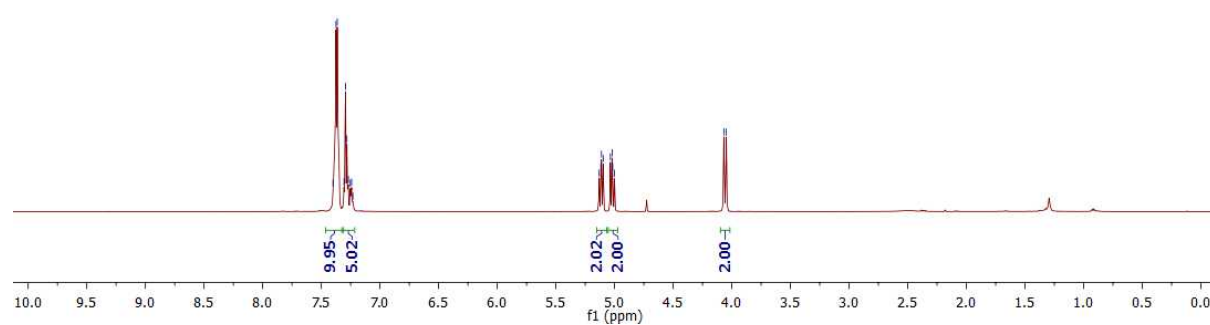

RJ-0217/pd-58-c  
PD58

13C-NMR in CDCl<sub>3</sub>

138.039 138.005 135.380 135.328 128.993 128.683 128.585 128.153 127.447 126.942  
68.703 68.667  
29.697 29.667

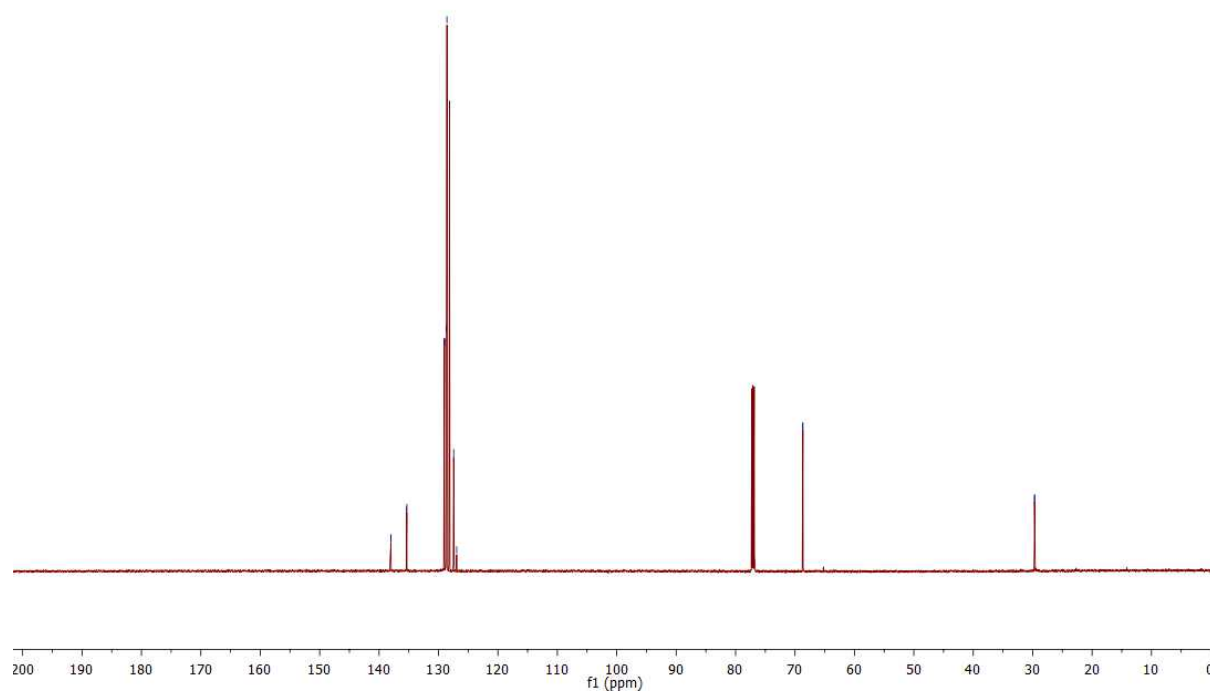

SK-PD-58-31P/1  
SK-PD-58-31P  
1H De-Coupled

-21.18

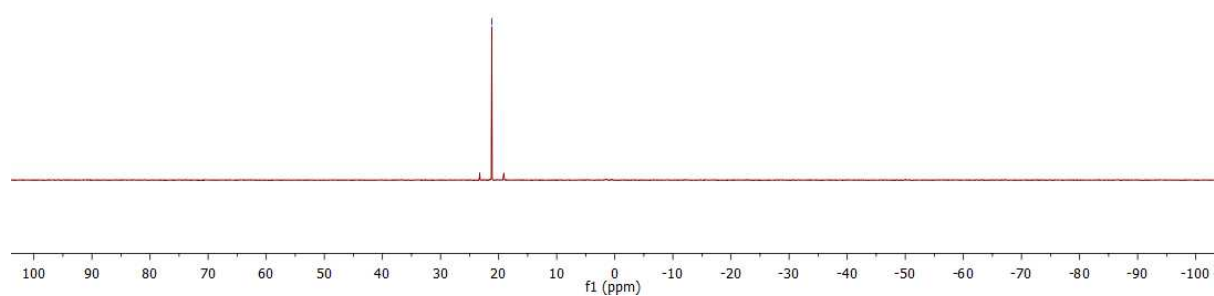

nmr/pd-113-h  
PD113 1H

8.179  
7.898  
7.842  
7.838  
7.832  
7.807  
7.798  
7.792  
7.784  
7.708  
7.694  
7.539  
7.533  
7.528  
7.523  
7.518  
7.512

4.195  
4.184  
4.179  
4.171  
4.168  
4.160  
4.155  
4.151  
4.144  
4.137  
4.126  
4.115  
4.110  
4.099  
1.659  
1.648  
1.636  
1.623  
1.612  
1.377  
1.364  
1.352  
1.339  
1.327  
1.315  
0.890  
0.877  
0.865

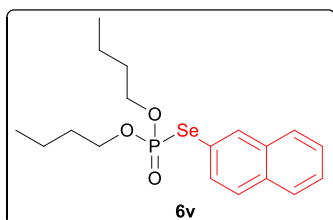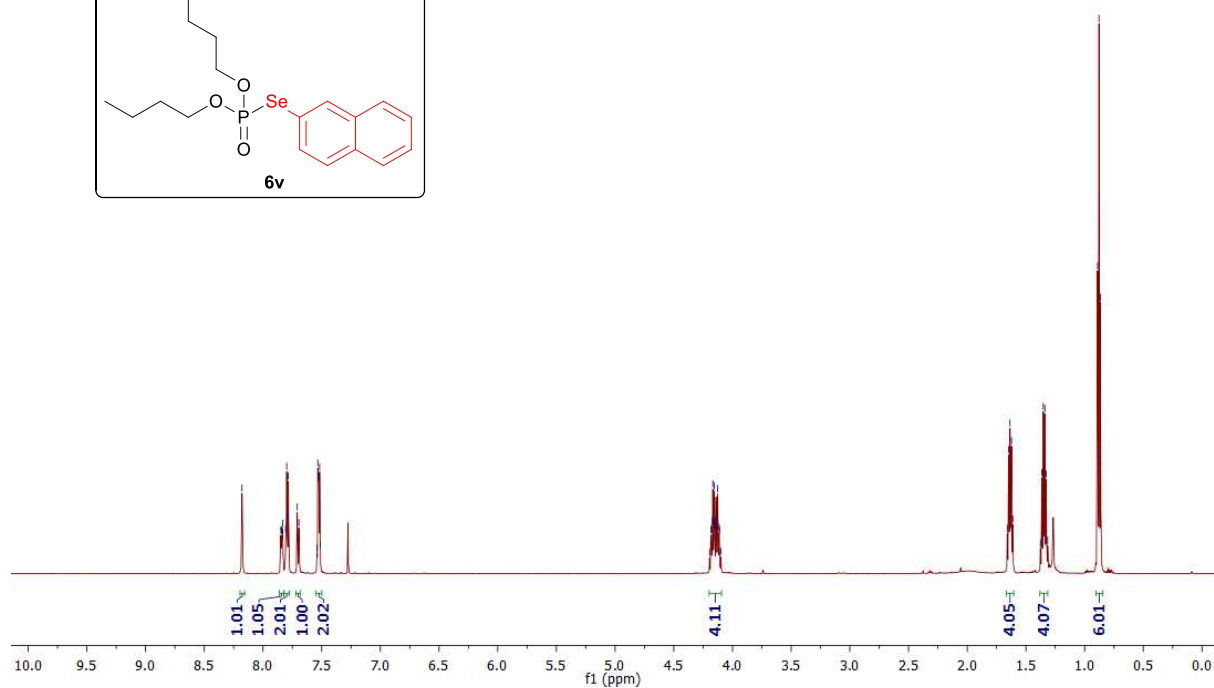



nmr/pd-113-c  
PD113 <sup>13</sup>C-NMR in CDCl<sub>3</sub>

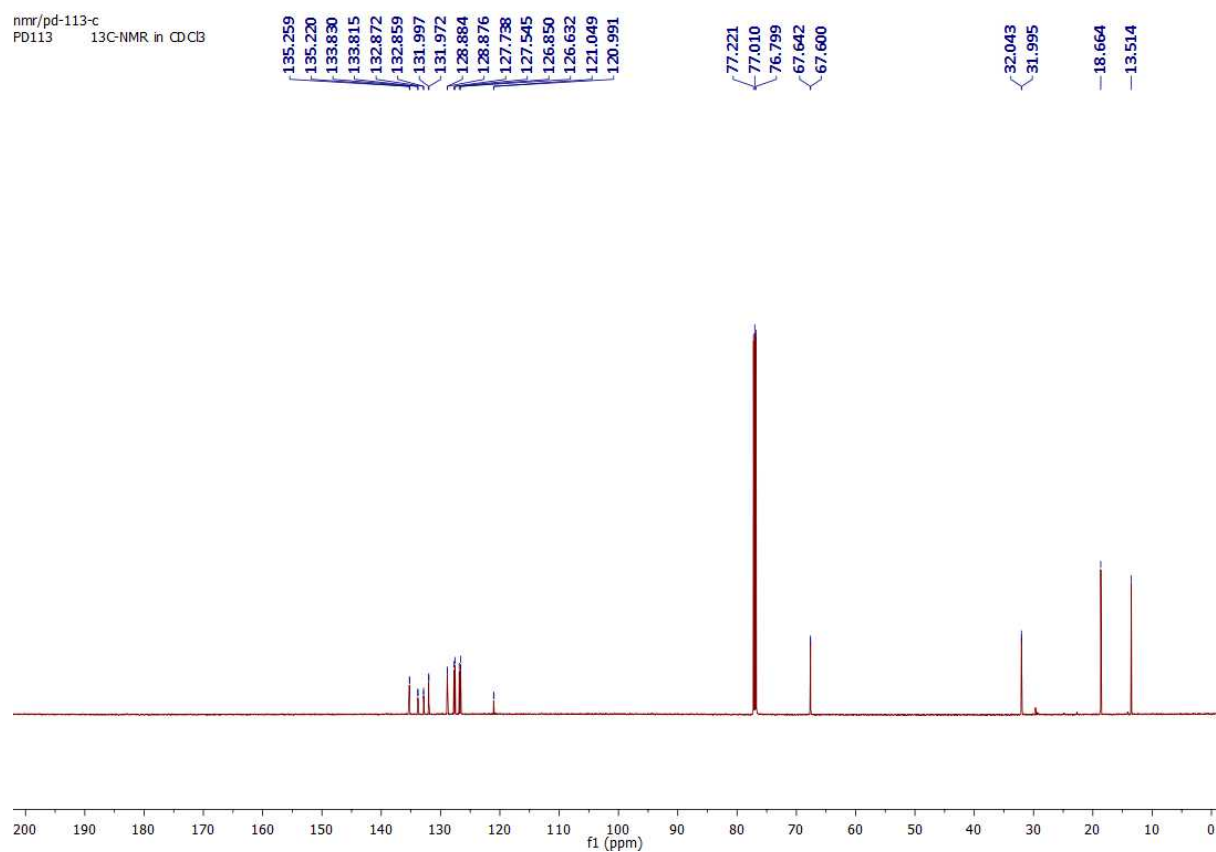

SK-PD-113-31P/1  
SK-PD-113-31P  
1H De-Coupled

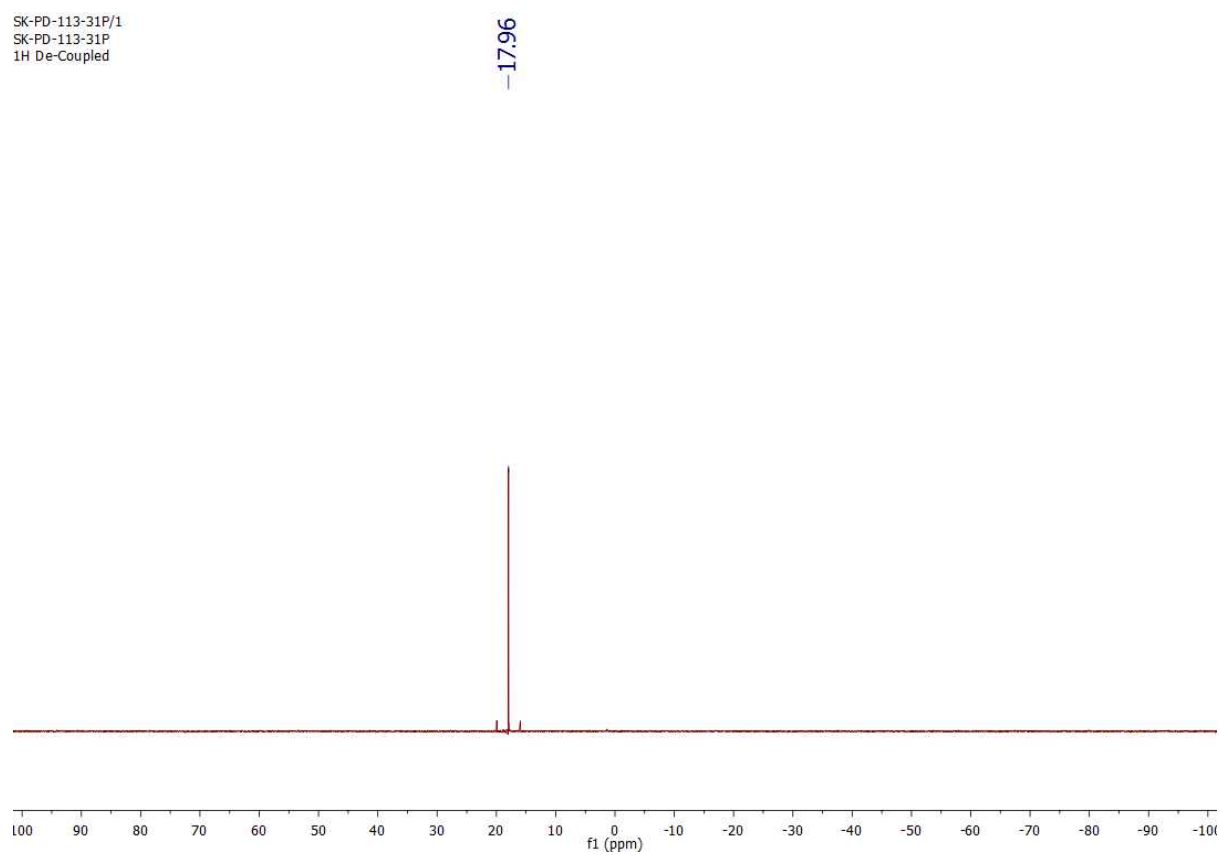

PD-113; <sup>77</sup>Se NMR

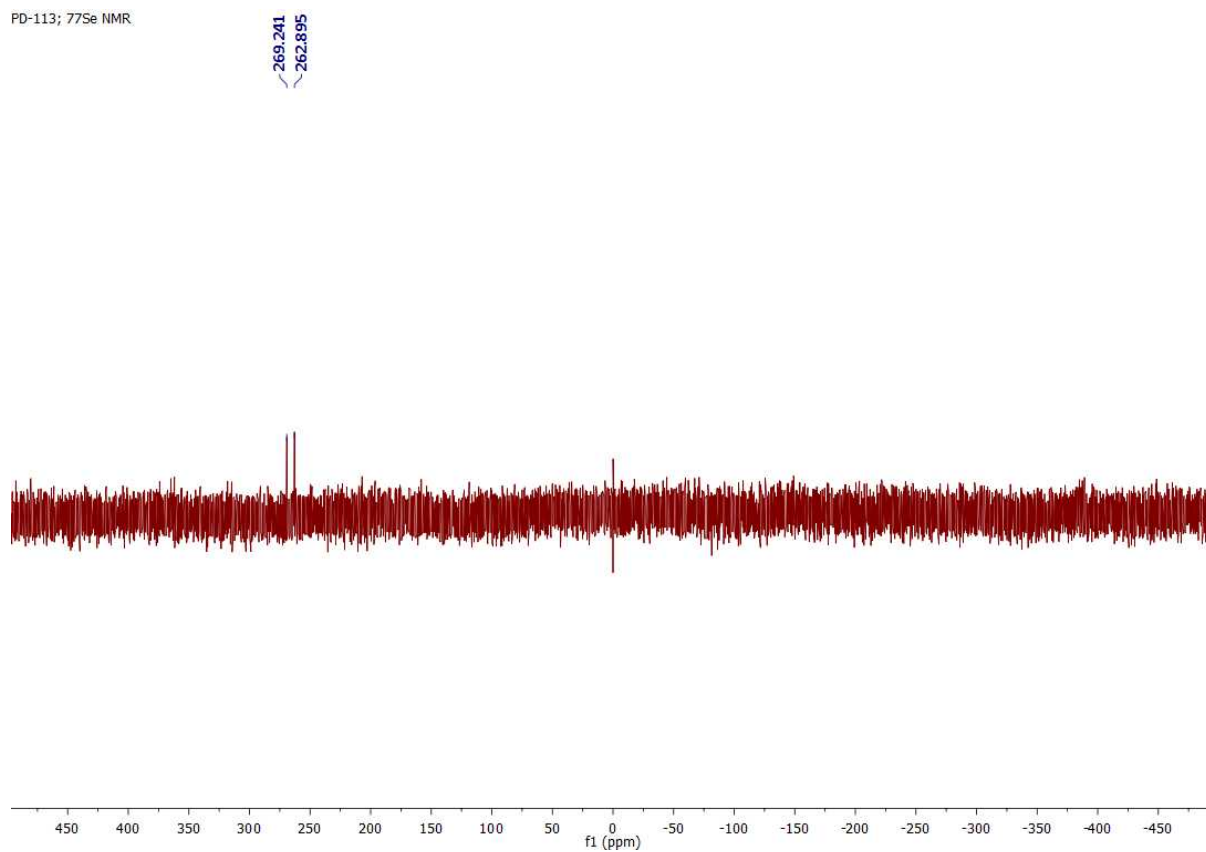

PD-83  
single\_pulse

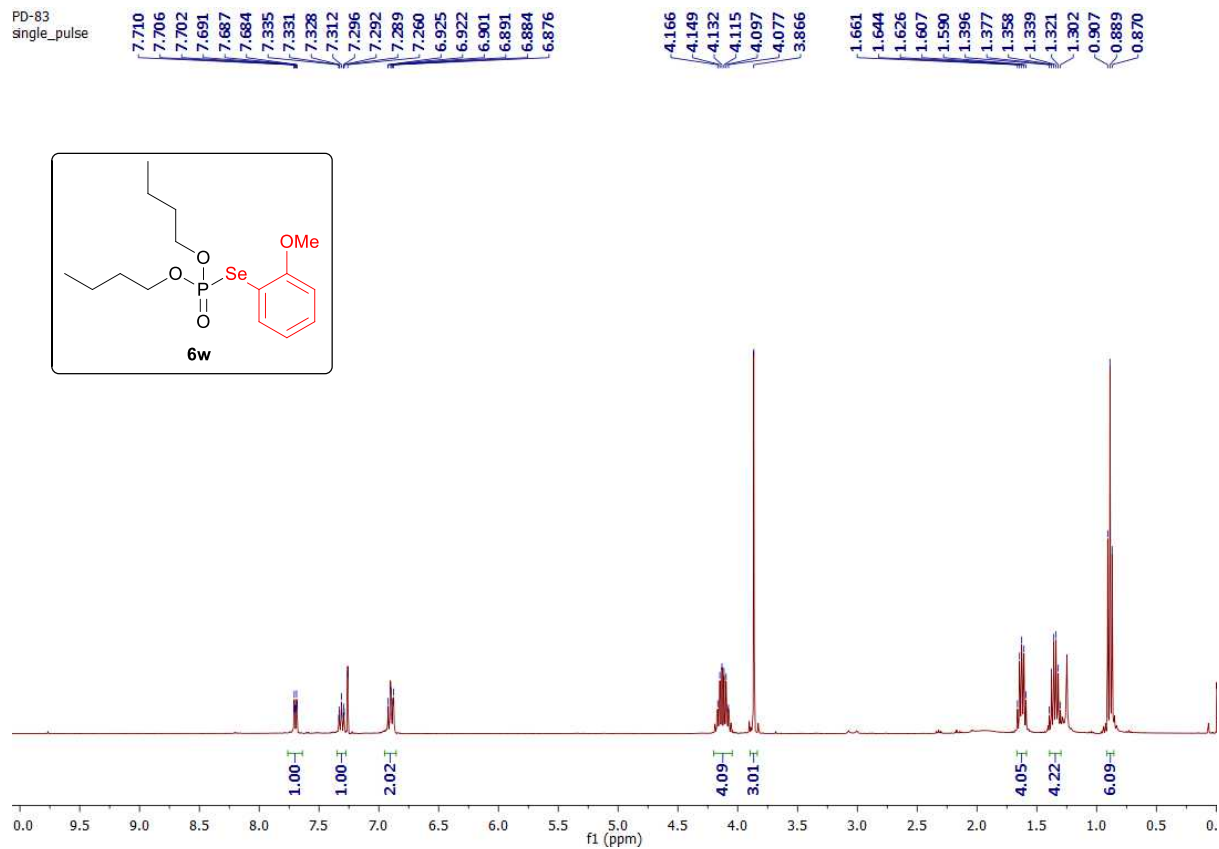

PD-83  
single pulse decoupled gated NOE

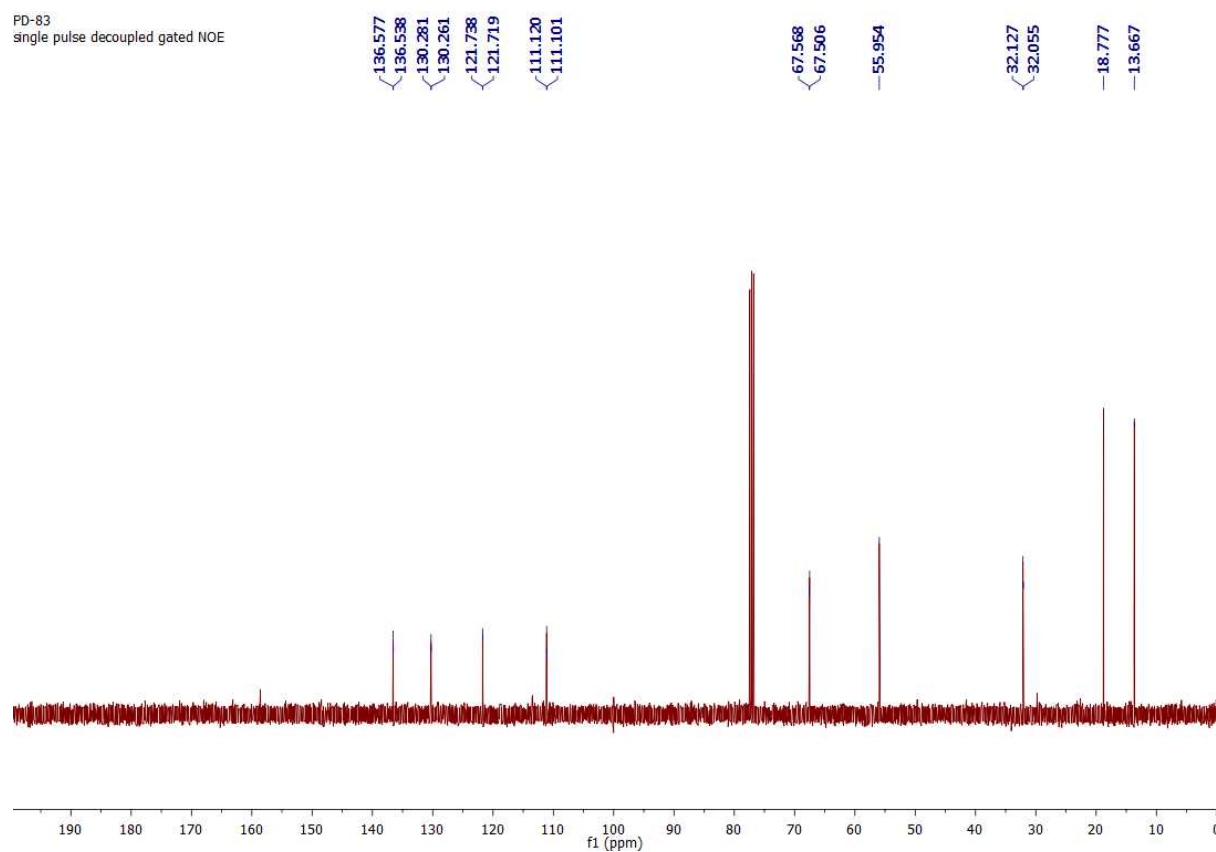

JD-DD-PD-83-31P.1.fid  
JD-DD-PD-83-31P  
1H De-Coupled

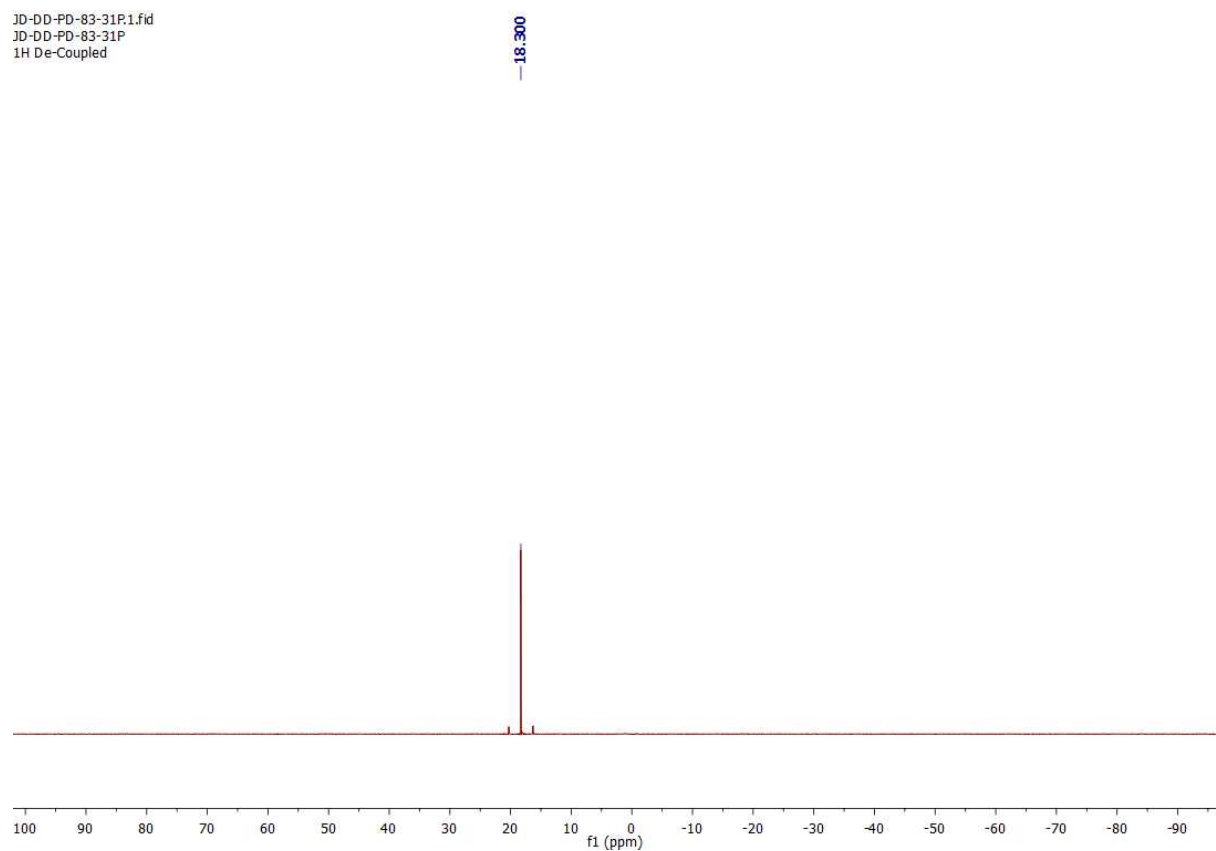

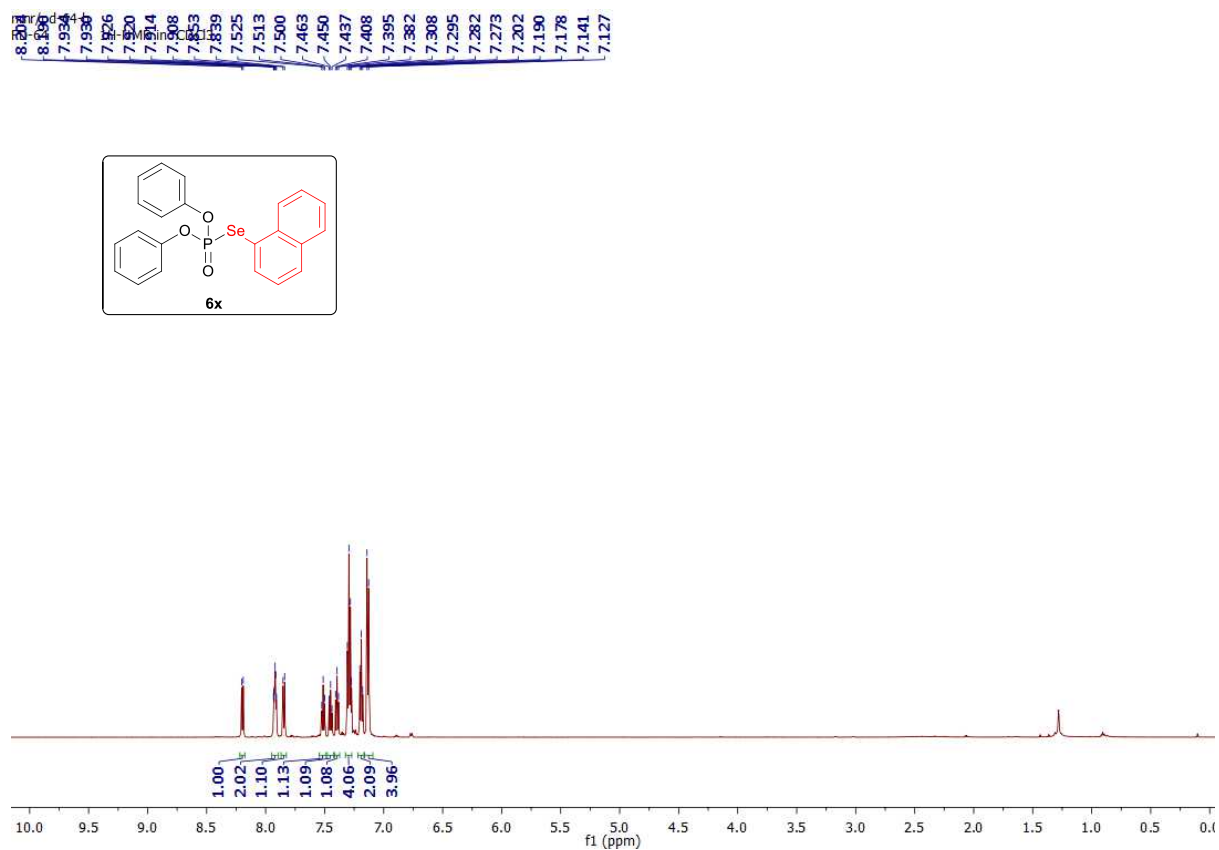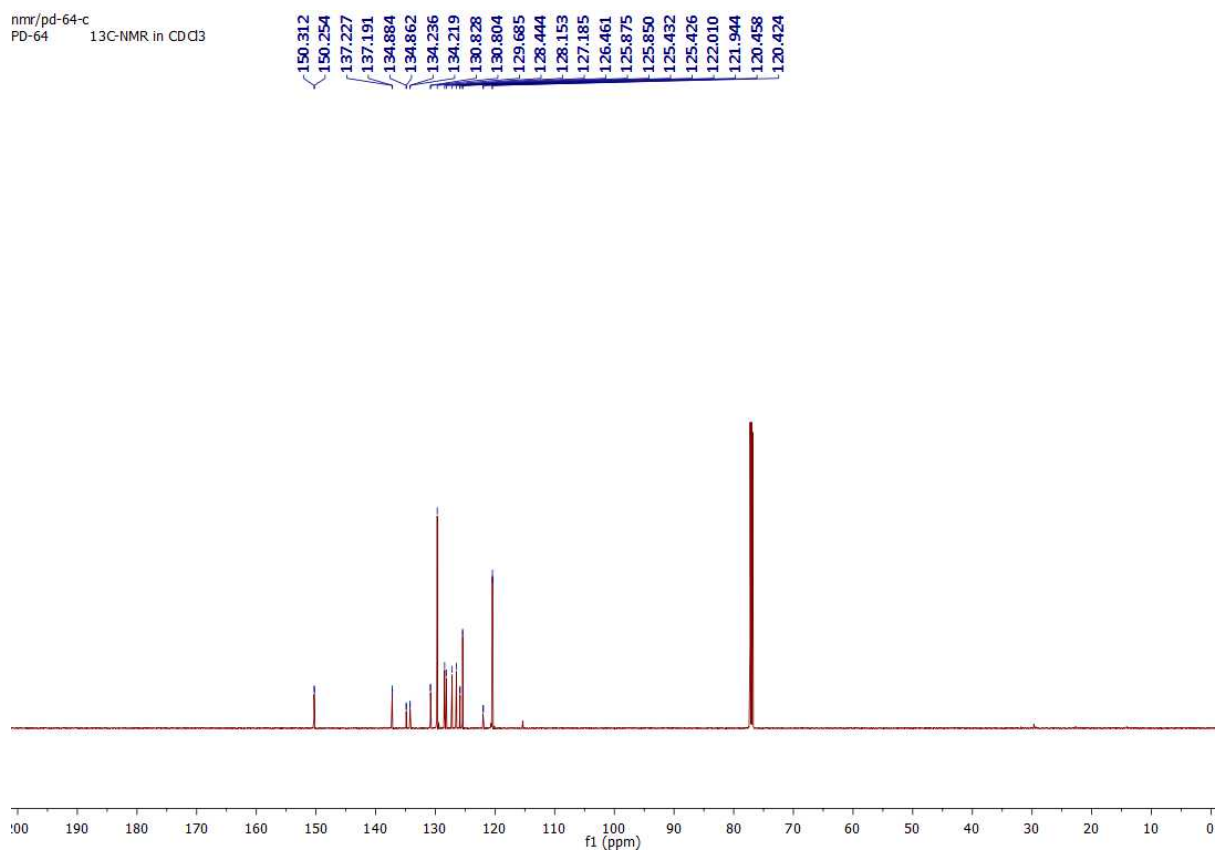

SK-PD-64-31P/1  
SK-PD-64-31P  
1H De-Coupled

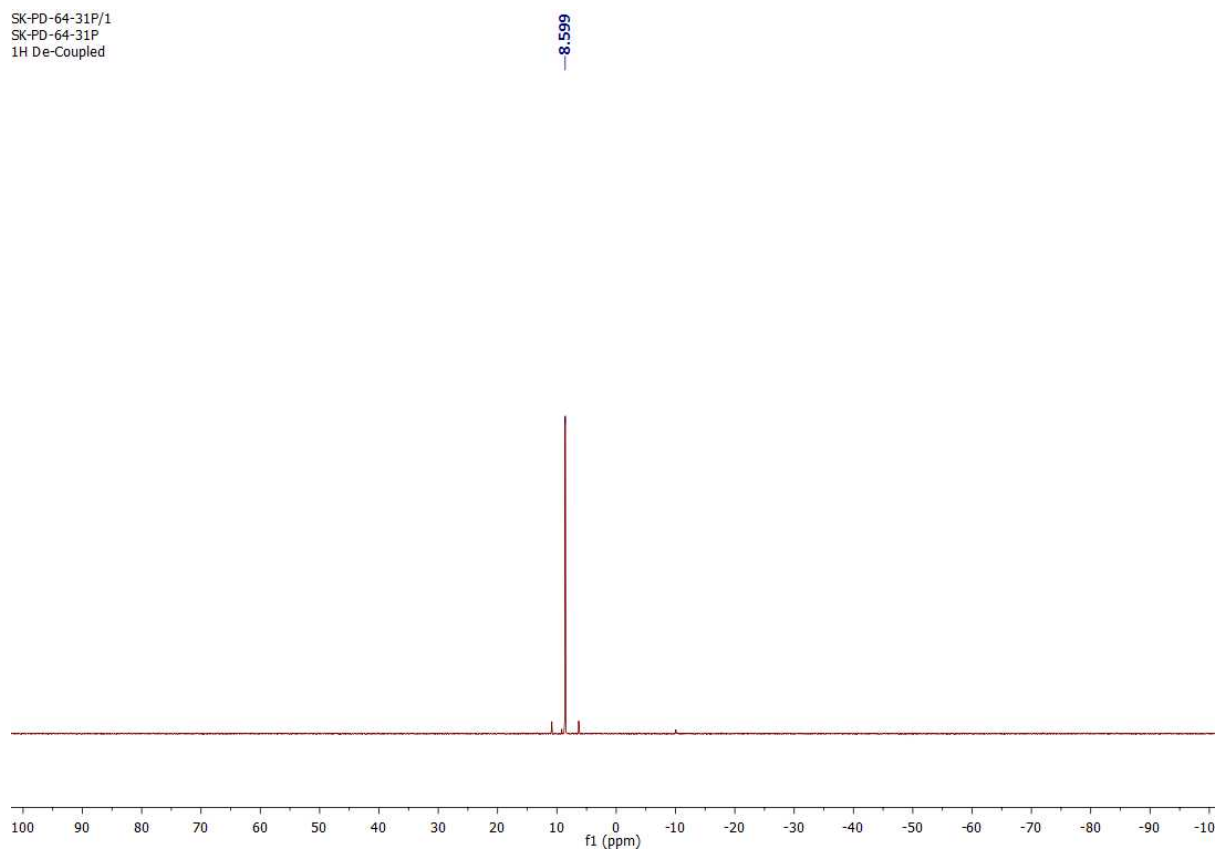

nmr/pd-112-h  
PD-112

8.610  
7.858  
7.845  
7.785  
7.771  
7.742  
7.730  
7.608  
7.593  
7.567  
7.557  
7.534  
7.532  
7.521  
7.367  
7.353  
7.341  
7.251  
7.225

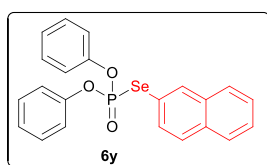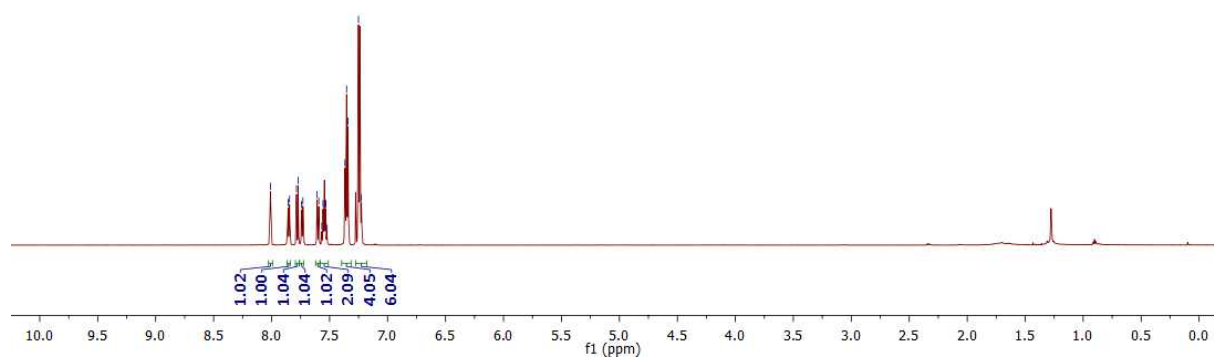

nmr/pd-112-c  
PD-112 <sup>13</sup>C-NMR in CDCl<sub>3</sub>

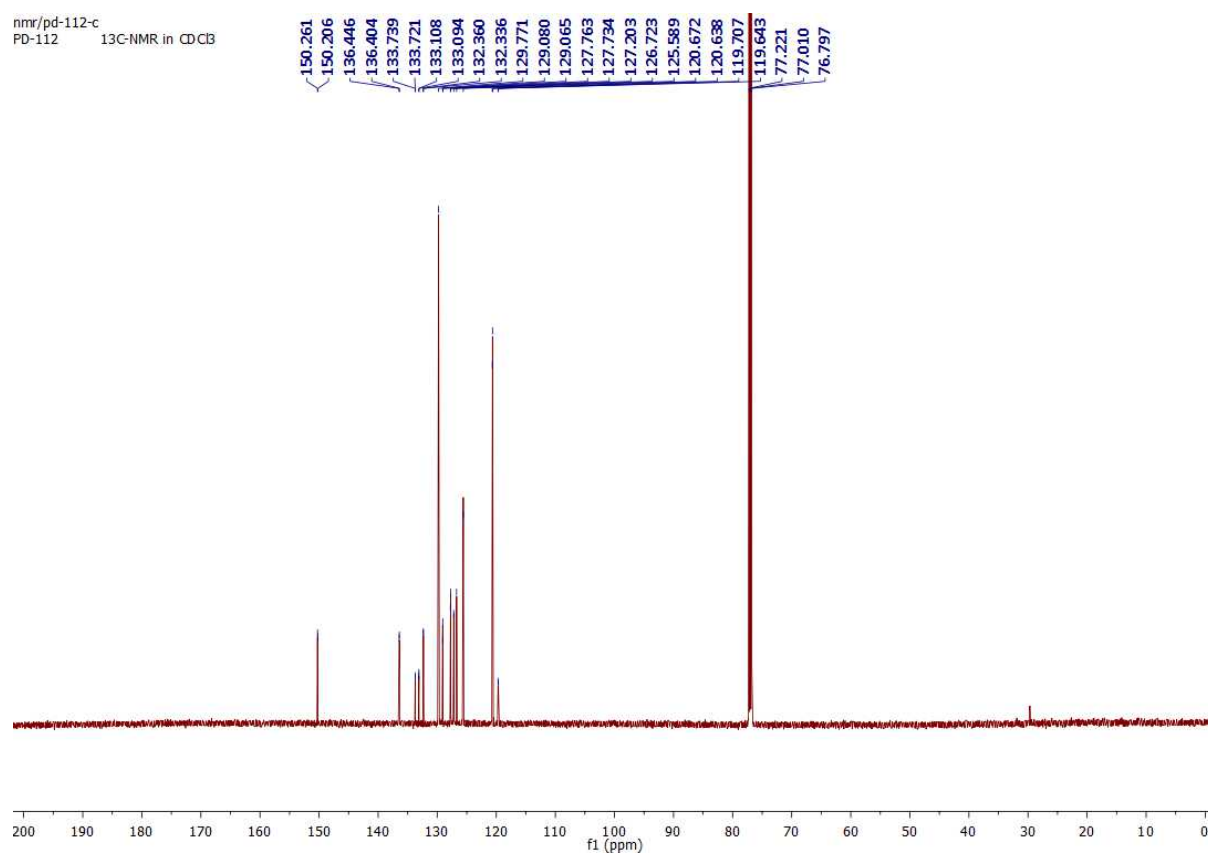

PD-112  
PD-112-31P

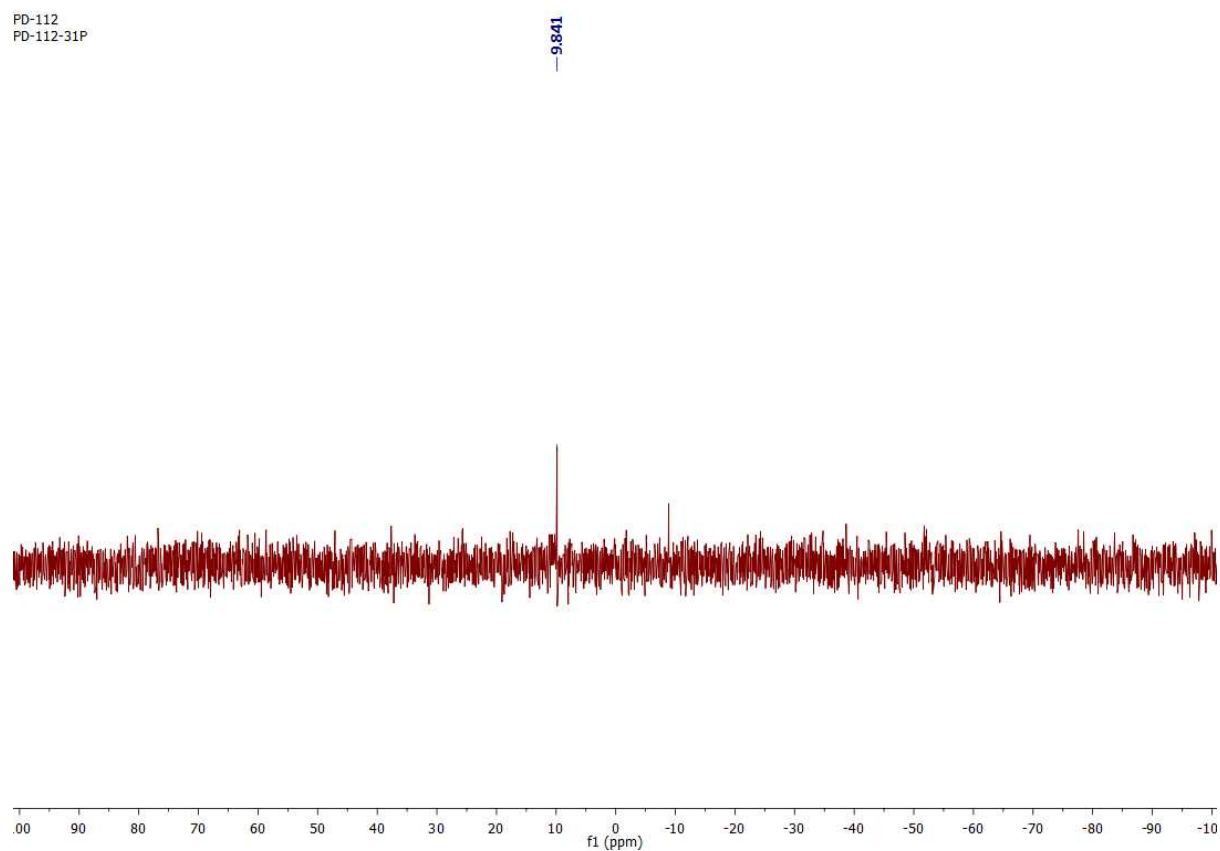

ZIDOVUDIN NMR/SB-2023-PD-H — SB-2023-PD 1H-NMR in CDCl<sub>3</sub>

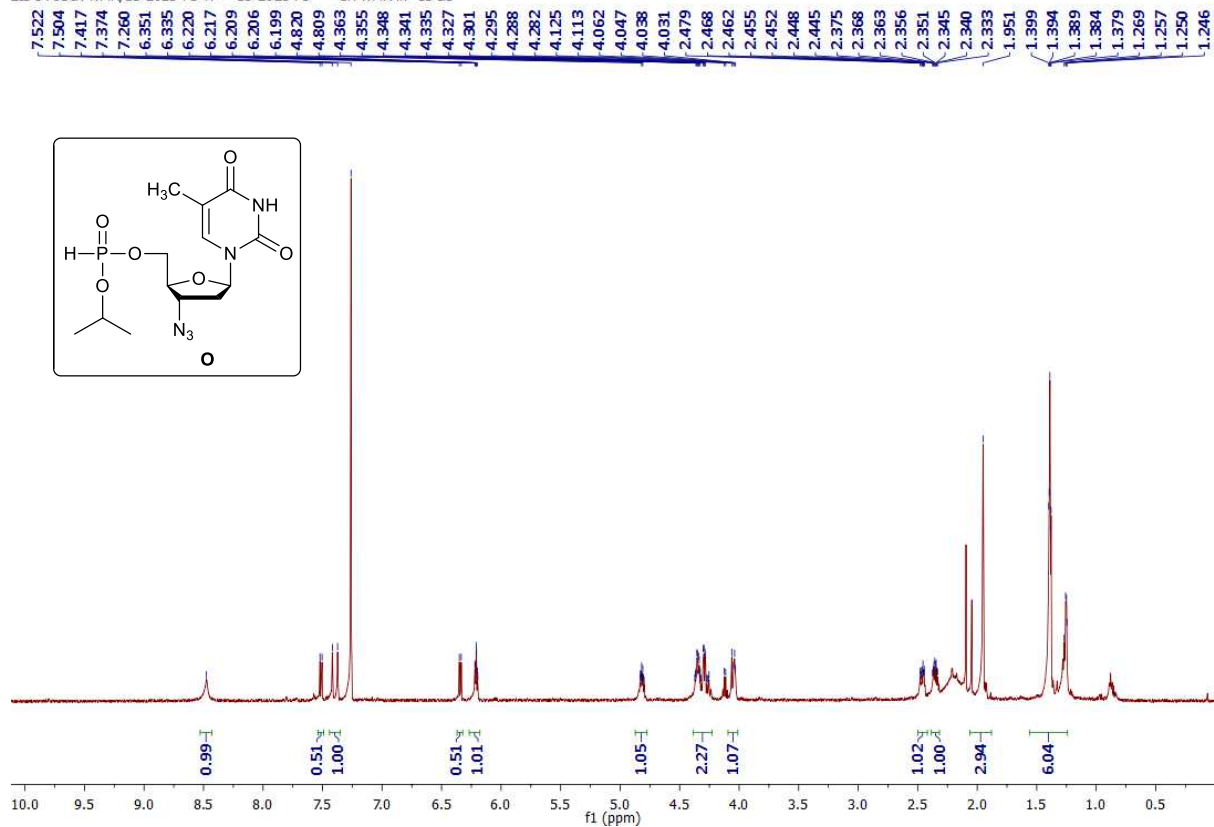

ZIDOVUDIN NMR/SB-2023-PD-C  
SB-2023-PD 13C-NMR in CDCl<sub>3</sub>

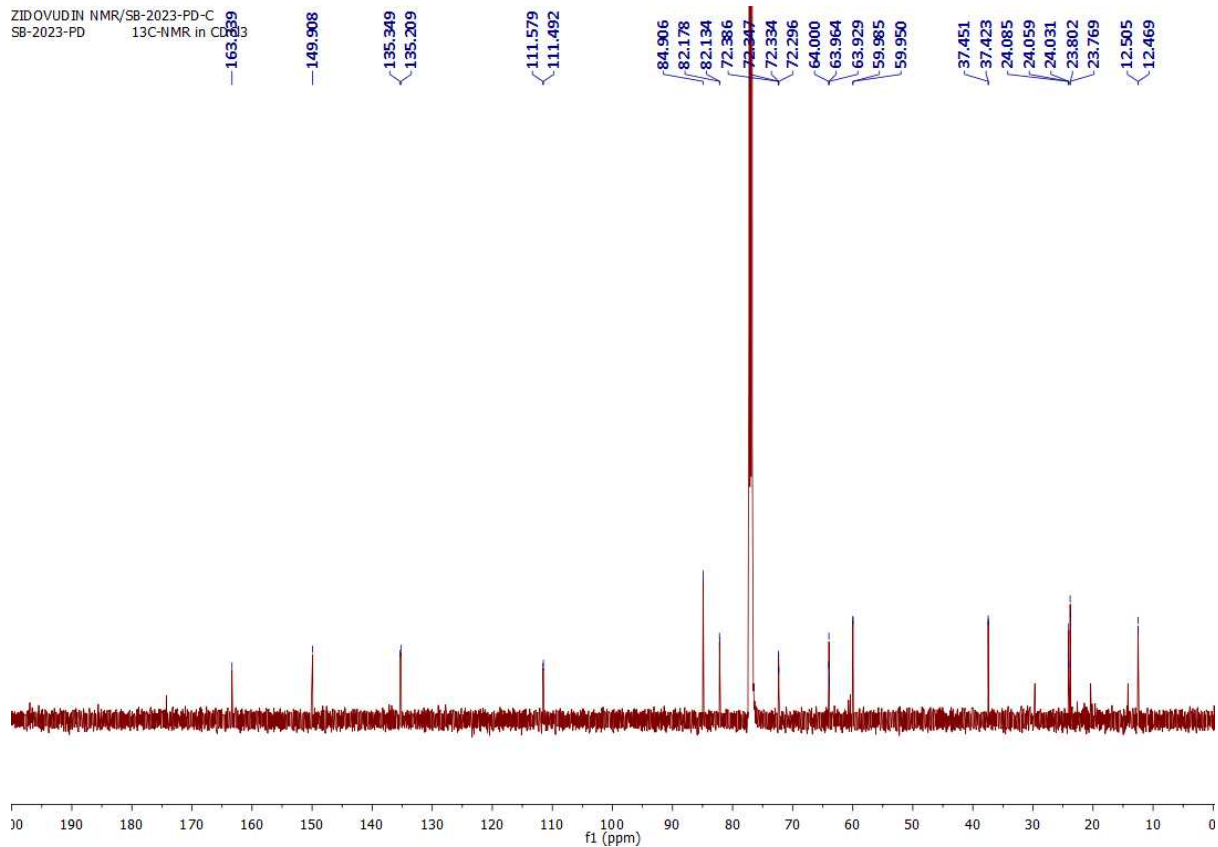

SB-2023-PD  
single pulse decoupled gated NOE

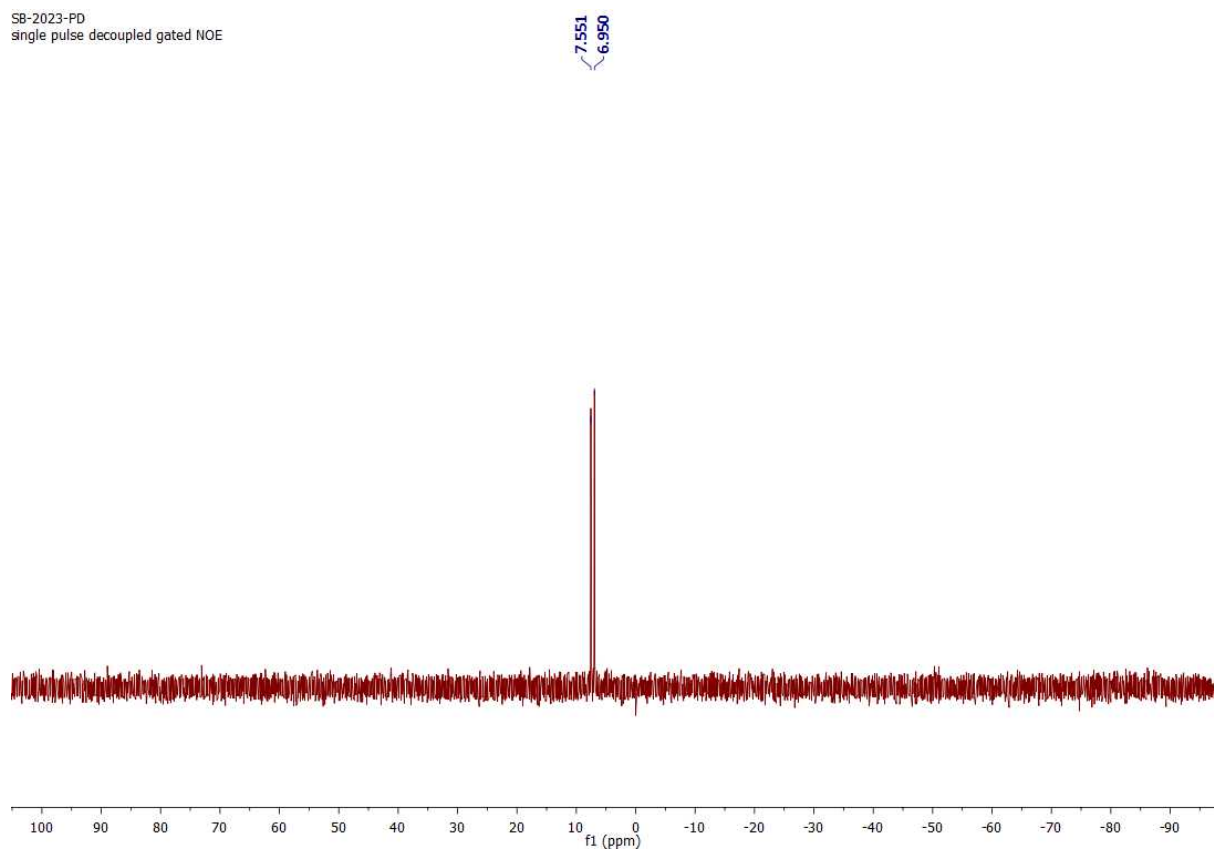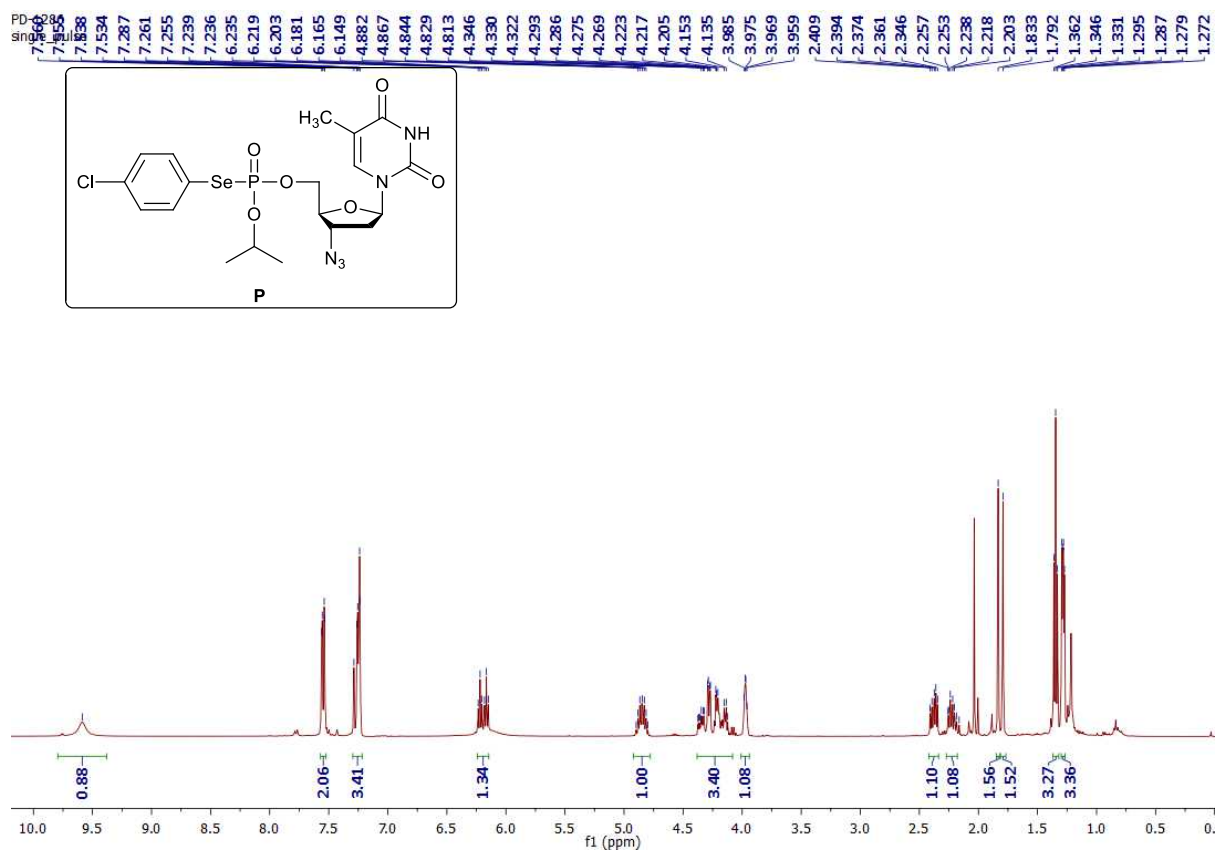



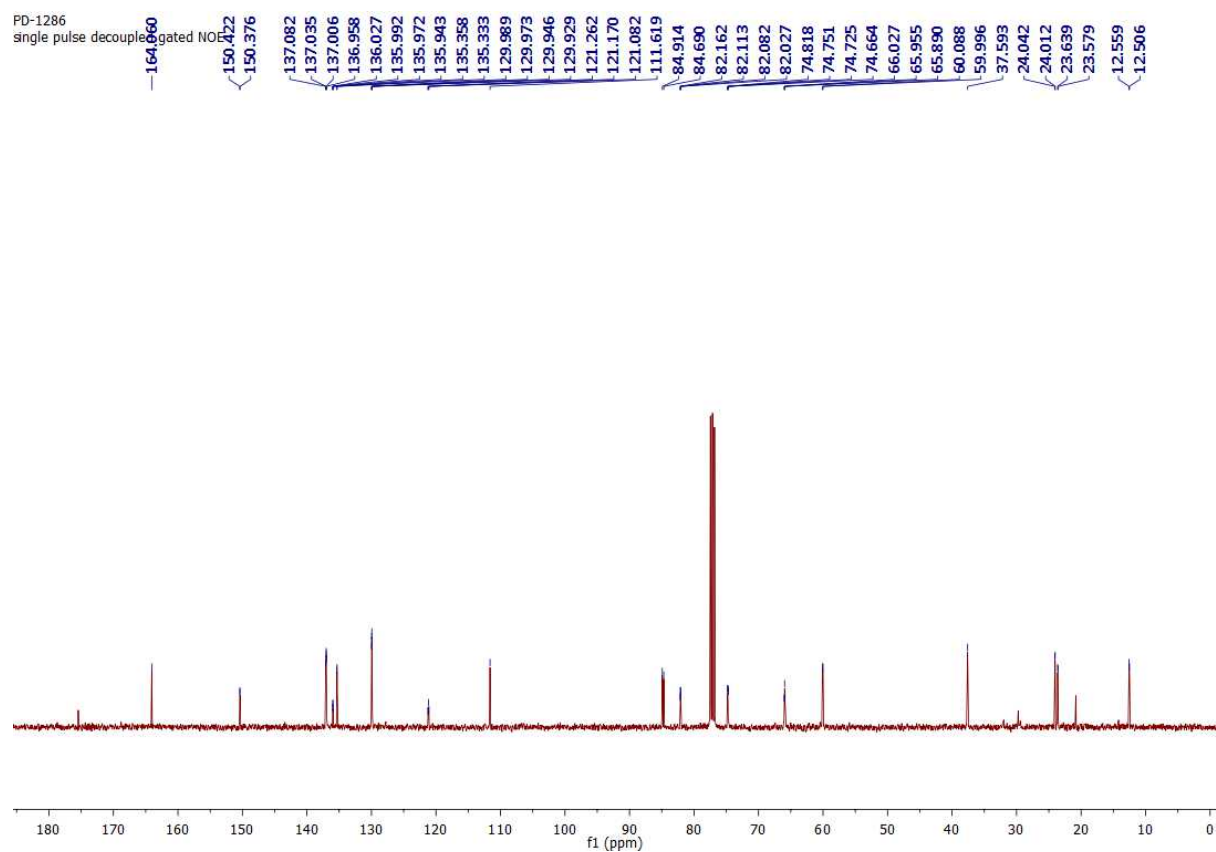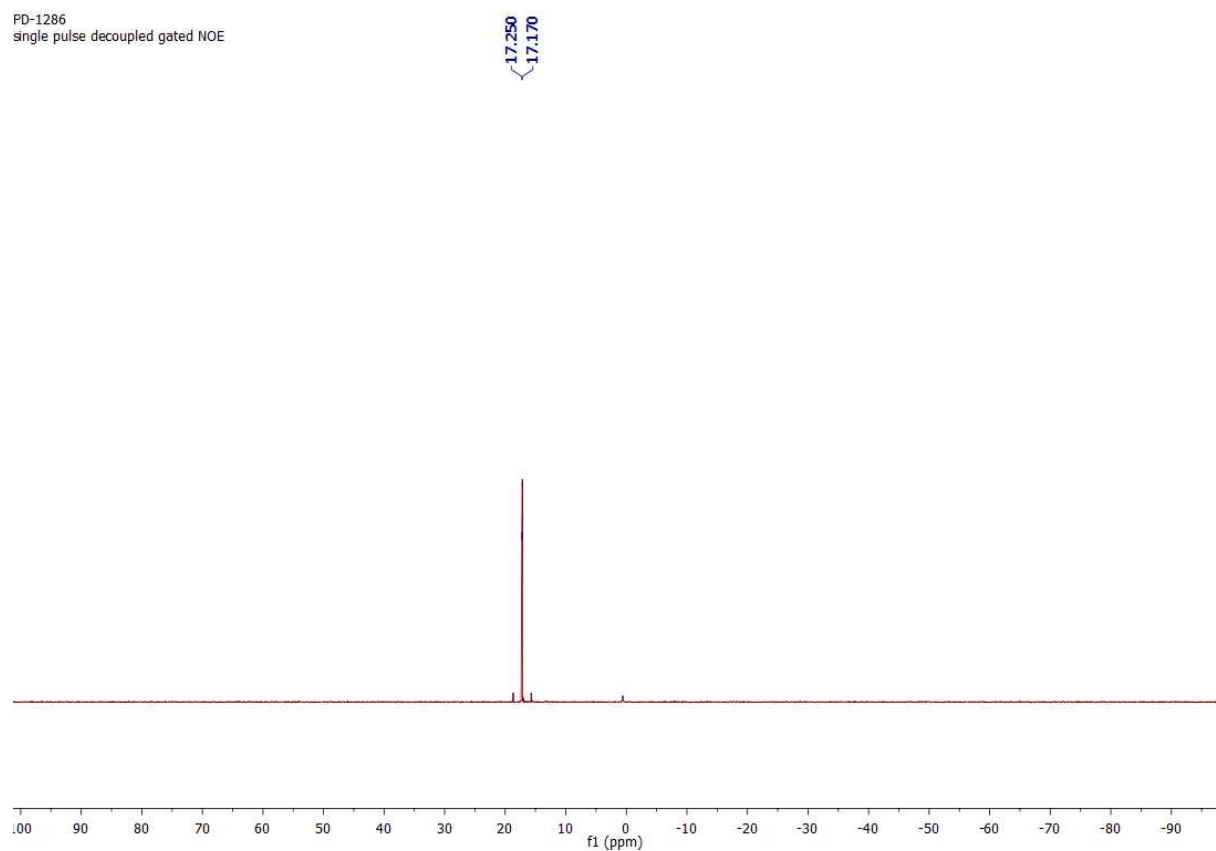

Supplement: c8ob02792g2.pdf [file c8ob02792g2.pdf]
