# Supplementary material for: Atom-economical selenation of electron-rich arenes and phosphonates with molecular oxygen at room temperature
Source: Royal Society of Chemistry journal article supplement (doi:10.1039/c8ob02792g), 2018-01-01
Supplement: c8ob02792g1.xlsx [file c8ob02792g1.xlsx]

## Sheet: Sheet1
220	2200	41.215
220.049	2200.49	45.084
220.098	2200.98	50.149
220.147	2201.47	56.222
220.195	2201.95	61.489
220.244	2202.44	64.515
220.293	2202.93	66.173
220.342	2203.42	68.589
220.391	2203.91	71.45
220.44	2204.4	73.194
220.488	2204.88	73.507
220.537	2205.37	73.079
220.586	2205.86	72.595
220.635	2206.35	73.745
220.684	2206.84	74.776
220.733	2207.33	74.378
220.782	2207.82	74.487
220.831	2208.3	74.729
220.879	2208.79	75.166
220.928	2209.28	75.548
220.977	2209.77	74.437
221.026	2210.26	71.834
221.075	2210.75	69.488
221.124	2211.24	67.837
221.172	2211.72	65.944
221.221	2212.21	64.995
221.27	2212.7	64.929
221.319	2213.19	63.246
221.368	2213.68	61.194
221.417	2214.17	59.338
221.465	2214.65	56.926
221.514	2215.14	54.896
221.563	2215.63	53.374
221.612	2216.12	52.734
221.661	2216.61	51.164
221.71	2217.1	49.851
221.759	2217.59	48.358
221.808	2218.07	47.809
221.856	2218.56	46.518
221.905	2219.05	45.109
221.954	2219.54	43.957
222.003	2220.03	42.5
222.052	2220.52	40.737
222.101	2221.01	38.731
222.149	2221.49	37.858
222.198	2221.98	37.054
222.247	2222.47	36.445
222.296	2222.96	34.468
222.345	2223.45	33.56
222.394	2223.94	33.034
222.443	2224.43	32.828
222.491	2224.91	33.816
222.54	2225.4	32.187
222.589	2225.89	30.001
222.638	2226.38	29.573
222.687	2226.87	30.652
222.736	2227.36	31.55
222.785	2227.85	31.83
222.833	2228.33	32.742
222.882	2228.82	32.098
222.931	2229.31	32.149
222.98	2229.8	33.019
223.029	2230.29	32.708
223.078	2230.78	31.842
223.126	2231.26	30.17
223.175	2231.75	30.379
223.224	2232.24	31.721
223.273	2232.73	32.132
223.322	2233.22	32.549
223.371	2233.71	32.036
223.42	2234.2	30.092
223.468	2234.68	28.717
223.517	2235.17	26.974
223.566	2235.66	25.05
223.615	2236.15	23.633
223.664	2236.64	20.597
223.713	2237.13	18.193
223.762	2237.62	17.733
223.81	2238.1	16.592
223.859	2238.59	16.458
223.908	2239.08	17.33
223.957	2239.57	18.084
224.006	2240.06	18.22
224.055	2240.55	17.174
224.103	2241.03	16.885
224.152	2241.52	17.29
224.201	2242.01	17.889
224.25	2242.5	17.744
224.299	2242.99	15.856
224.348	2243.48	13.725
224.397	2243.97	12.224
224.446	2244.45	11.231
224.494	2244.94	9.556
224.543	2245.43	7.512
224.592	2245.92	5.475
224.641	2246.41	3.382
224.69	2246.9	1.67
224.739	2247.39	0.277
224.787	2247.87	-0.048
224.836	2248.36	0.697
224.885	2248.85	0.573
224.934	2249.34	1.267
224.983	2249.83	2.343
225.032	2250.32	2.863
225.081	2250.8	4.701
225.129	2251.29	6.733
225.178	2251.78	9.209
225.227	2252.27	10.066
225.276	2252.76	9.742
225.325	2253.25	10.111
225.374	2253.74	10.424
225.423	2254.23	10.681
225.471	2254.71	11.381
225.52	2255.2	12.212
225.569	2255.69	14.3
225.618	2256.18	15.519
225.667	2256.67	15.931
225.716	2257.16	16.724
225.764	2257.64	18.023
225.813	2258.13	20.078
225.862	2258.62	22.14
225.911	2259.11	23.457
225.96	2259.6	22.968
226.009	2260.09	23.235
226.058	2260.58	23.445
226.106	2261.06	22.599
226.155	2261.55	21.071
226.204	2262.04	18.737
226.253	2262.53	16.846
226.302	2263.02	13.586
226.351	2263.51	10.144
226.399	2263.99	8.146
226.448	2264.48	6.403
226.497	2264.97	4.354
226.546	2265.46	1.811
226.595	2265.95	-1.664
226.644	2266.44	-4.133
226.693	2266.93	-5.721
226.742	2267.41	-8.241
226.79	2267.9	-10.755
226.839	2268.39	-12.451
226.888	2268.88	-13.829
226.937	2269.37	-15.389
226.986	2269.86	-18.067
227.035	2270.35	-20.99
227.083	2270.83	-24.345
227.132	2271.32	-27.569
227.181	2271.81	-29.725
227.23	2272.3	-32.125
227.279	2272.79	-34.77
227.328	2273.28	-37.284
227.376	2273.76	-40.855
227.425	2274.25	-43.483
227.474	2274.74	-45.667
227.523	2275.23	-46.596
227.572	2275.72	-46.645
227.621	2276.21	-46
227.67	2276.7	-44.475
227.719	2277.18	-41.882
227.767	2277.67	-38.846
227.816	2278.16	-36.929
227.865	2278.65	-34.319
227.914	2279.14	-31.016
227.963	2279.63	-29.333
228.012	2280.12	-27.457
228.06	2280.61	-26.076
228.109	2281.09	-24.813
228.158	2281.58	-24.046
228.207	2282.07	-24.773
228.256	2282.56	-25.807
228.305	2283.05	-24.399
228.354	2283.54	-23.922
228.402	2284.02	-23.752
228.451	2284.51	-24.578
228.5	2285	-23.96
228.549	2285.49	-21.775
228.598	2285.98	-19.584
228.647	2286.47	-18.638
228.696	2286.95	-17.249
228.744	2287.44	-15.792
228.793	2287.93	-12.267
228.842	2288.42	-8.988
228.891	2288.91	-6.14
228.94	2289.4	-3.787
228.989	2289.89	-1.429
229.037	2290.38	0.246
229.086	2290.86	2.365
229.135	2291.35	4.301
229.184	2291.84	6.492
229.233	2292.33	6.689
229.282	2292.82	6.89
229.331	2293.31	5.347
229.379	2293.79	4.809
229.428	2294.28	4.088
229.477	2294.77	3.936
229.526	2295.26	2.475
229.575	2295.75	1.083
229.624	2296.24	1.008
229.673	2296.73	-0.688
229.721	2297.21	-1.627
229.77	2297.7	-2.687
229.819	2298.19	-3.43
229.868	2298.68	-5.167
229.917	2299.17	-5.337
229.966	2299.66	-4.439
230.014	2300.14	-4.474
230.063	2300.63	-7.067
230.112	2301.12	-9.216
230.161	2301.61	-9.424
230.21	2302.1	-8.876
230.259	2302.59	-8.511
230.308	2303.08	-7.579
230.357	2303.57	-6.454
230.405	2304.05	-4.262
230.454	2304.54	-2.565
230.503	2305.03	-1.488
230.552	2305.52	-1.156
230.601	2306.01	-0.945
230.65	2306.5	-0.228
230.698	2306.98	0.118
230.747	2307.47	-0.906
230.796	2307.96	-1.675
230.845	2308.45	-2.251
230.894	2308.94	-5.386
230.943	2309.43	-10.328
230.992	2309.91	-15.265
231.04	2310.4	-17.948
231.089	2310.89	-20.126
231.138	2311.38	-23.549
231.187	2311.87	-27.217
231.236	2312.36	-30.193
231.285	2312.85	-32.415
231.333	2313.34	-33.757
231.382	2313.82	-36.031
231.431	2314.31	-38.801
231.48	2314.8	-40.004
231.529	2315.29	-40.889
231.578	2315.78	-41.333
231.627	2316.27	-42.147
231.675	2316.75	-44.206
231.724	2317.24	-45.823
231.773	2317.73	-46.81
231.822	2318.22	-46.856
231.871	2318.71	-46.459
231.92	2319.2	-46.683
231.969	2319.69	-47.464
232.017	2320.17	-46.179
232.066	2320.66	-44.514
232.115	2321.15	-44.782
232.164	2321.64	-46.983
232.213	2322.13	-49.179
232.262	2322.62	-50.746
232.31	2323.11	-49.496
232.359	2323.59	-47.429
232.408	2324.08	-45.483
232.457	2324.57	-44.844
232.506	2325.06	-44.389
232.555	2325.55	-43.179
232.604	2326.04	-41.09
232.653	2326.53	-38.246
232.701	2327.01	-36.398
232.75	2327.5	-36.671
232.799	2327.99	-37.189
232.848	2328.48	-38.14
232.897	2328.97	-37.9
232.946	2329.46	-38.467
232.994	2329.94	-38.718
233.043	2330.43	-38.402
233.092	2330.92	-38.706
233.141	2331.41	-40.069
233.19	2331.9	-39.802
233.239	2332.39	-38.906
233.287	2332.88	-39.068
233.336	2333.36	-39.726
233.385	2333.85	-40.88
233.434	2334.34	-39.342
233.483	2334.83	-36.675
233.532	2335.32	-37.566
233.581	2335.81	-39.577
233.63	2336.3	-39.522
233.678	2336.78	-37.838
233.727	2337.27	-36.399
233.776	2337.76	-36.769
233.825	2338.25	-37.072
233.874	2338.74	-37.996
233.923	2339.23	-39.416
233.971	2339.72	-39.394
234.02	2340.2	-40.181
234.069	2340.69	-41.963
234.118	2341.18	-43.616
234.167	2341.67	-45.265
234.216	2342.16	-45.973
234.265	2342.65	-46.676
234.313	2343.13	-47.438
234.362	2343.62	-48.196
234.411	2344.11	-48.012
234.46	2344.6	-48.324
234.509	2345.09	-48.382
234.558	2345.58	-49.561
234.607	2346.07	-49.298
234.655	2346.55	-48.032
234.704	2347.04	-46.323
234.753	2347.53	-44.799
234.802	2348.02	-42.708
234.851	2348.51	-42.175
234.9	2349	-41.701
234.948	2349.49	-40.223
234.997	2349.97	-38.116
235.046	2350.46	-36.38
235.095	2350.95	-35.139
235.144	2351.44	-35.083
235.193	2351.93	-34.148
235.242	2352.42	-31.833
235.29	2352.9	-27.828
235.339	2353.39	-24.068
235.388	2353.88	-21.492
235.437	2354.37	-19.162
235.486	2354.86	-17.391
235.535	2355.35	-16.928
235.583	2355.84	-16.462
235.632	2356.32	-15.991
235.681	2356.81	-14.517
235.73	2357.3	-13.101
235.779	2357.79	-13.87
235.828	2358.28	-15.259
235.877	2358.77	-16.457
235.925	2359.26	-16.588
235.974	2359.74	-17.091
236.023	2360.23	-18.59
236.072	2360.72	-20.086
236.121	2361.21	-21.077
236.17	2361.7	-22.315
236.219	2362.19	-23.049
236.268	2362.68	-23.217
236.316	2363.16	-23.068
236.365	2363.65	-22.791
236.414	2364.14	-21.698
236.463	2364.63	-20.226
236.512	2365.12	-19.375
236.561	2365.61	-19.52
236.609	2366.09	-18.725
236.658	2366.58	-18.925
236.707	2367.07	-18.747
236.756	2367.56	-20.128
236.805	2368.05	-22.818
236.854	2368.54	-25.941
236.903	2369.03	-27.936
236.951	2369.51	-29.428
237	2370	-30.978
237.049	2370.49	-31.962
237.098	2370.98	-33.192
237.147	2371.47	-34.357
237.196	2371.96	-36.08
237.244	2372.44	-36.174
237.293	2372.93	-35.328
237.342	2373.42	-35.603
237.391	2373.91	-36.187
237.44	2374.4	-35.83
237.489	2374.89	-35.532
237.538	2375.38	-36.918
237.586	2375.86	-37.363
237.635	2376.35	-37.366
237.684	2376.84	-36.179
237.733	2377.33	-35.176
237.782	2377.82	-34.482
237.831	2378.31	-33.347
237.88	2378.8	-32.521
237.928	2379.28	-31.441
237.977	2379.77	-30.795
238.026	2380.26	-29.709
238.075	2380.75	-29.431
238.124	2381.24	-27.838
238.173	2381.73	-25.554
238.221	2382.22	-23.016
238.27	2382.7	-21.975
238.319	2383.19	-21.618
238.368	2383.68	-21.882
238.417	2384.17	-21.768
238.466	2384.66	-21.651
238.515	2385.15	-21.968
238.564	2385.64	-23.094
238.612	2386.12	-24.779
238.661	2386.61	-28.773
238.71	2387.1	-31.202
238.759	2387.59	-32.689
238.808	2388.08	-33.861
238.857	2388.57	-35.717
238.905	2389.05	-35.757
238.954	2389.54	-35.732
239.003	2390.03	-36.203
239.052	2390.52	-36.858
239.101	2391.01	-36.51
239.15	2391.5	-35.283
239.198	2391.99	-32.929
239.247	2392.47	-31.759
239.296	2392.96	-31.085
239.345	2393.45	-29.908
239.394	2393.94	-29.54
239.443	2394.43	-28.982
239.492	2394.92	-28.545
239.541	2395.41	-27.543
239.589	2395.89	-27.538
239.638	2396.38	-29.404
239.687	2396.87	-31.704
239.736	2397.36	-33.377
239.785	2397.85	-34.671
239.834	2398.34	-35.899
239.882	2398.82	-37.062
239.931	2399.31	-38.534
239.98	2399.8	-39.691
240.029	2400.29	-41.657
240.078	2400.78	-43.494
240.127	2401.27	-45.829
240.176	2401.76	-48.16
240.224	2402.24	-50.864
240.273	2402.73	-52.876
240.322	2403.22	-54.261
240.371	2403.71	-54.642
240.42	2404.2	-55.271
240.469	2404.69	-55.646
240.518	2405.18	-55.081
240.566	2405.66	-53.825
240.615	2406.15	-51.066
240.664	2406.64	-46.804
240.713	2407.13	-42.539
240.762	2407.62	-39.271
240.811	2408.11	-36.312
240.859	2408.59	-32.975
240.908	2409.08	-29.823
240.957	2409.57	-27.668
241.006	2410.06	-25.697
241.055	2410.55	-23.911
241.104	2411.04	-23.247
241.153	2411.53	-22.079
241.201	2412.01	-21.659
241.25	2412.5	-21.111
241.299	2412.99	-20.81
241.348	2413.48	-21.38
241.397	2413.97	-23.198
241.446	2414.46	-25.076
241.494	2414.94	-26.325
241.543	2415.43	-25.759
241.592	2415.92	-24.253
241.641	2416.41	-23.868
241.69	2416.9	-25.481
241.739	2417.39	-25.653
241.788	2417.88	-25.073
241.837	2418.36	-24.552
241.885	2418.85	-24.528
241.934	2419.34	-23.876
241.983	2419.83	-22.596
242.032	2420.32	-22.376
242.081	2420.81	-22.653
242.13	2421.3	-22.427
242.179	2421.79	-22.574
242.227	2422.27	-22.342
242.276	2422.76	-21.733
242.325	2423.25	-21.933
242.374	2423.74	-20.818
242.423	2424.23	-20.137
242.472	2424.72	-21.079
242.52	2425.2	-22.456
242.569	2425.69	-22.954
242.618	2426.18	-23.575
242.667	2426.67	-24.506
242.716	2427.16	-26.996
242.765	2427.65	-30.296
242.814	2428.14	-31.718
242.862	2428.62	-32.825
242.911	2429.11	-33.679
242.96	2429.6	-35.468
243.009	2430.09	-36.066
243.058	2430.58	-34.787
243.107	2431.07	-32.943
243.155	2431.55	-31.346
243.204	2432.04	-30.933
243.253	2432.53	-28.143
243.302	2433.02	-24.038
243.351	2433.51	-20.555
243.4	2434	-18.569
243.449	2434.49	-16.393
243.497	2434.97	-14.214
243.546	2435.46	-13.345
243.595	2435.95	-11.349
243.644	2436.44	-9.599
243.693	2436.93	-6.973
243.742	2437.42	-6.593
243.791	2437.91	-6.586
243.839	2438.39	-7.388
243.888	2438.88	-7.751
243.937	2439.37	-6.61
243.986	2439.86	-6.843
244.035	2440.35	-7.822
244.084	2440.84	-8.986
244.132	2441.32	-9.898
244.181	2441.81	-10.807
244.23	2442.3	-11.714
244.279	2442.79	-13.743
244.328	2443.28	-16.456
244.377	2443.77	-18.668
244.426	2444.26	-22.314
244.475	2444.74	-26.645
244.523	2445.23	-29.661
244.572	2445.72	-32.924
244.621	2446.21	-36.435
244.67	2446.7	-39.255
244.719	2447.19	-41.511
244.768	2447.68	-43.764
244.816	2448.16	-45.015
244.865	2448.65	-43.95
244.914	2449.14	-42.633
244.963	2449.63	-41.876
245.012	2450.12	-42.366
245.061	2450.61	-42.104
245.109	2451.09	-41.84
245.158	2451.58	-41.573
245.207	2452.07	-41.178
245.256	2452.56	-40.281
245.305	2453.05	-37.881
245.354	2453.54	-36.104
245.403	2454.03	-34.012
245.452	2454.52	-32.792
245.5	2455	-31.507
245.549	2455.49	-30.595
245.598	2455.98	-28.493
245.647	2456.47	-26.764
245.696	2456.96	-26.282
245.745	2457.45	-26.172
245.793	2457.93	-26.498
245.842	2458.42	-26.196
245.891	2458.91	-25.892
245.94	2459.4	-26.023
245.989	2459.89	-25.964
246.038	2460.38	-27.34
246.087	2460.87	-29.026
246.135	2461.35	-29.147
246.184	2461.84	-29.641
246.233	2462.33	-30.695
246.282	2462.82	-31.746
246.331	2463.31	-32.295
246.38	2463.8	-32.592
246.429	2464.29	-31.948
246.477	2464.77	-30.615
246.526	2465.26	-29.155
246.575	2465.75	-28.192
246.624	2466.24	-26.414
246.673	2466.73	-24.384
246.722	2467.22	-22.852
246.77	2467.7	-21.942
246.819	2468.19	-21.53
246.868	2468.68	-21.241
246.917	2469.17	-22.011
246.966	2469.66	-22.467
247.015	2470.15	-22.796
247.064	2470.64	-22.872
247.112	2471.12	-24.196
247.161	2471.61	-23.33
247.21	2472.1	-21.524
247.259	2472.59	-19.966
247.308	2473.08	-18.406
247.357	2473.57	-17.719
247.405	2474.05	-16.091
247.454	2474.54	-13.274
247.503	2475.03	-9.767
247.552	2475.52	-6.008
247.601	2476.01	-2.434
247.65	2476.5	0.517
247.699	2476.99	1.721
247.748	2477.47	3.864
247.796	2477.96	6.509
247.845	2478.45	9.845
247.894	2478.94	11.807
247.943	2479.43	11.772
247.992	2479.92	11.426
248.041	2480.41	9.895
248.089	2480.89	7.554
248.138	2481.38	5.528
248.187	2481.87	4.254
248.236	2482.36	1.357
248.285	2482.85	-1.788
248.334	2483.34	-4.118
248.383	2483.83	-5.258
248.431	2484.31	-6.771
248.48	2484.8	-8.845
248.529	2485.29	-11.353
248.578	2485.78	-12.235
248.627	2486.27	-12.989
248.676	2486.76	-14.367
248.725	2487.24	-16.742
248.773	2487.73	-18.49
248.822	2488.22	-18.735
248.871	2488.71	-17.666
248.92	2489.2	-16.158
248.969	2489.69	-15.397
249.018	2490.18	-14.509
249.066	2490.66	-12.244
249.115	2491.15	-9.039
249.164	2491.64	-5.77
249.213	2492.13	-3.374
249.262	2492.62	-0.725
249.311	2493.11	1.175
249.36	2493.6	3.391
249.408	2494.08	4.046
249.457	2494.57	5.578
249.506	2495.06	6.862
249.555	2495.55	8.773
249.604	2496.04	9.874
249.653	2496.53	9.727
249.702	2497.02	10.019
249.75	2497.5	10.064
249.799	2497.99	9.985
249.848	2498.48	9.909
249.897	2498.97	8.897
249.946	2499.46	7.263
249.995	2499.95	7.568
250.043	2500.43	8.75
250.092	2500.92	9.309
250.141	2501.41	7.62
250.19	2501.9	5.621
250.239	2502.39	4.123
250.288	2502.88	4.065
250.337	2503.37	4.76
250.386	2503.86	4.831
250.434	2504.34	3.154
250.483	2504.83	1.605
250.532	2505.32	1.432
250.581	2505.81	2.949
250.63	2506.3	3.093
250.679	2506.79	2.802
250.727	2507.27	2.95
250.776	2507.76	4.099
250.825	2508.25	4.626
250.874	2508.74	4.03
250.923	2509.23	5.186
250.972	2509.72	5.219
251.02	2510.2	5.004
251.069	2510.69	4.041
251.118	2511.18	3.33
251.167	2511.67	2.308
251.216	2512.16	1.601
251.265	2512.65	1.584
251.314	2513.14	2.443
251.363	2513.62	2.992
251.411	2514.11	2.855
251.46	2514.6	2.658
251.509	2515.09	2.837
251.558	2515.58	4.269
251.607	2516.07	5.702
251.656	2516.56	6.2
251.704	2517.05	7.45
251.753	2517.53	7.389
251.802	2518.02	7.893
251.851	2518.51	8.211
251.9	2519	7.719
251.949	2519.49	7.041
251.998	2519.98	8.177
252.046	2520.46	9.941
252.095	2520.95	10.519
252.144	2521.44	9.848
252.193	2521.93	9.055
252.242	2522.42	9.513
252.291	2522.91	9.974
252.339	2523.39	9.749
252.388	2523.88	8.963
252.437	2524.37	8.554
252.486	2524.86	8.459
252.535	2525.35	7.992
252.584	2525.84	6.463
252.633	2526.33	6.124
252.681	2526.82	6.037
252.73	2527.3	6.202
252.779	2527.79	7.306
252.828	2528.28	7.225
252.877	2528.77	8.333
252.926	2529.26	10.443
252.975	2529.75	11.679
253.023	2530.23	11.293
253.072	2530.72	11.658
253.121	2531.21	12.65
253.17	2531.7	13.582
253.219	2532.19	14.765
253.268	2532.68	16.138
253.316	2533.16	18.137
253.365	2533.65	18.076
253.414	2534.14	16.955
253.463	2534.63	16.085
253.512	2535.12	15.654
253.561	2535.61	15.1
253.61	2536.1	15.11
253.659	2536.59	13.81
253.707	2537.07	13.824
253.756	2537.56	14.778
253.805	2538.05	16.67
253.854	2538.54	17.065
253.903	2539.03	15.774
253.952	2539.52	15.172
254	2540.01	16.322
254.049	2540.49	18.223
254.098	2540.98	19.752
254.147	2541.47	20.595
254.196	2541.96	20.689
254.245	2542.45	21.848
254.294	2542.94	23.258
254.342	2543.42	23.858
254.391	2543.91	23.522
254.44	2544.4	23.376
254.489	2544.89	24.543
254.538	2545.38	25.4
254.587	2545.87	25.446
254.636	2546.36	25.432
254.684	2546.84	24.981
254.733	2547.33	24.22
254.782	2547.82	24.836
254.831	2548.31	25.141
254.88	2548.8	26.073
254.929	2549.29	26.256
254.977	2549.78	24.254
255.026	2550.26	22.565
255.075	2550.75	20.567
255.124	2551.24	18.882
255.173	2551.73	17.449
255.222	2552.22	14.455
255.271	2552.71	10.526
255.319	2553.19	6.91
255.368	2553.68	3.234
255.417	2554.17	0.81
255.466	2554.66	-0.988
255.515	2555.15	-3.221
255.564	2555.64	-4.39
255.613	2556.12	-4.37
255.661	2556.61	-3.849
255.71	2557.1	-3.513
255.759	2557.59	-1.175
255.808	2558.08	1.164
255.857	2558.57	3.38
255.906	2559.06	5.348
255.954	2559.55	8.254
256.003	2560.03	11.225
256.052	2560.52	13.198
256.101	2561.01	13.797
256.15	2561.5	14.336
256.199	2561.99	14.501
256.248	2562.48	16.418
256.296	2562.96	17.149
256.345	2563.45	17.944
256.394	2563.94	19.804
256.443	2564.43	20.79
256.492	2564.92	21.528
256.541	2565.41	21.892
256.59	2565.9	23.32
256.638	2566.38	25.063
256.687	2566.87	26.245
256.736	2567.36	25.866
256.785	2567.85	25.989
256.834	2568.34	27.175
256.883	2568.83	29.801
256.932	2569.32	31.241
256.98	2569.8	30.058
257.029	2570.29	29.439
257.078	2570.78	29.821
257.127	2571.27	30.518
257.176	2571.76	30.591
257.225	2572.25	29.603
257.274	2572.74	27.93
257.322	2573.22	27.321
257.371	2573.71	27.713
257.42	2574.2	28.357
257.469	2574.69	28.252
257.518	2575.18	27.649
257.567	2575.67	28.048
257.615	2576.15	29.073
257.664	2576.64	30.037
257.713	2577.13	29.191
257.762	2577.62	27.721
257.811	2578.11	27.94
257.86	2578.6	29.474
257.909	2579.09	30.508
257.957	2579.57	30.795
258.006	2580.06	32.958
258.055	2580.55	35.873
258.104	2581.04	37.476
258.153	2581.53	37.832
258.202	2582.02	38.314
258.25	2582.51	38.86
258.299	2582.99	38.407
258.348	2583.48	37.457
258.397	2583.97	37.195
258.446	2584.46	37.06
258.495	2584.95	37.551
258.544	2585.44	37.294
258.592	2585.92	36.789
258.641	2586.41	35.722
258.69	2586.9	35.408
258.739	2587.39	35.969
258.788	2587.88	34.47
258.837	2588.37	32.285
258.886	2588.86	30.101
258.934	2589.34	29.044
258.983	2589.83	28.426
259.032	2590.32	25.498
259.081	2590.81	22.383
259.13	2591.3	20.144
259.179	2591.79	16.908
259.228	2592.28	12.235
259.276	2592.76	10.001
259.325	2593.25	7.957
259.374	2593.74	5.851
259.423	2594.23	4.122
259.472	2594.72	2.207
259.521	2595.21	0.919
259.57	2595.7	0.319
259.618	2596.18	-0.466
259.667	2596.67	-1.125
259.716	2597.16	-2.22
259.765	2597.65	-1.876
259.814	2598.14	-1.593
259.863	2598.63	-0.995
259.911	2599.11	0.104
259.96	2599.6	2.266
260.009	2600.09	4.806
260.058	2600.58	9.159
260.107	2601.07	14.014
260.156	2601.56	17.62
260.205	2602.05	20.728
260.253	2602.53	22.587
260.302	2603.02	23.011
260.351	2603.51	25.123
260.4	2604	27.862
260.449	2604.49	31.227
260.498	2604.98	32.657
260.546	2605.46	31.963
260.595	2605.95	31.27
260.644	2606.44	31.079
260.693	2606.93	31.327
260.742	2607.42	30.326
260.791	2607.91	28.952
260.84	2608.4	28.83
260.889	2608.89	28.834
260.937	2609.37	29.276
260.986	2609.86	29.283
261.035	2610.35	27.854
261.084	2610.84	26.864
261.133	2611.33	27.188
261.182	2611.82	26.826
261.23	2612.3	25.215
261.279	2612.79	24.231
261.328	2613.28	25.123
261.377	2613.77	25.141
261.426	2614.26	23.724
261.475	2614.75	22.996
261.524	2615.24	24.206
261.572	2615.72	25.606
261.621	2616.21	25.945
261.67	2616.7	25.722
261.719	2617.19	26.564
261.768	2617.68	27.907
261.817	2618.17	31.376
261.865	2618.65	35.472
261.914	2619.14	37.819
261.963	2619.63	40.793
262.012	2620.12	43.706
262.061	2620.61	45.87
262.11	2621.1	46.161
262.159	2621.59	46.953
262.207	2622.07	49.809
262.256	2622.56	51.854
262.305	2623.05	52.526
262.354	2623.54	53.636
262.403	2624.03	54.436
262.452	2624.52	54.674
262.501	2625.01	53.914
262.549	2625.49	51.28
262.598	2625.98	49.835
262.647	2626.47	50.704
262.696	2626.96	51.45
262.745	2627.45	51.384
262.794	2627.94	49.82
262.842	2628.42	48.383
262.891	2628.91	47.884
262.94	2629.4	47.575
262.989	2629.89	45.954
263.038	2630.38	43.897
263.087	2630.87	41.841
263.136	2631.36	41.475
263.185	2631.85	41.485
263.233	2632.33	40.809
263.282	2632.82	38.947
263.331	2633.31	35.773
263.38	2633.8	33.789
263.429	2634.29	32.618
263.478	2634.78	31.824
263.526	2635.26	31.032
263.575	2635.75	30.491
263.624	2636.24	29.889
263.673	2636.73	29.163
263.722	2637.22	27.376
263.771	2637.71	25.965
263.82	2638.2	24.494
263.868	2638.68	22.899
263.917	2639.17	20.93
263.966	2639.66	20.15
264.015	2640.15	20.809
264.064	2640.64	22.407
264.113	2641.13	23.132
264.161	2641.61	22.982
264.21	2642.1	22.46
264.259	2642.59	23.876
264.308	2643.08	26.168
264.357	2643.57	27.712
264.406	2644.06	27.445
264.455	2644.55	28.117
264.503	2645.03	28.728
264.552	2645.52	27.84
264.601	2646.01	26.516
264.65	2646.5	27.506
264.699	2646.99	27.747
264.748	2647.48	28.177
264.797	2647.97	26.359
264.845	2648.45	26.917
264.894	2648.94	29.164
264.943	2649.43	30.474
264.992	2649.92	30.224
265.041	2650.41	29.663
265.09	2650.9	30.165
265.139	2651.39	32.419
265.187	2651.87	35.799
265.236	2652.36	38.181
265.285	2652.85	39.564
265.334	2653.34	40.261
265.383	2653.83	42.146
265.432	2654.32	44.284
265.481	2654.81	45.672
265.529	2655.29	47.187
265.578	2655.78	48.078
265.627	2656.27	48.284
265.676	2656.76	48.553
265.725	2657.25	49.323
265.774	2657.74	51.033
265.822	2658.22	52.493
265.871	2658.71	53.081
265.92	2659.2	52.169
265.969	2659.69	51.196
266.018	2660.18	51.475
266.067	2660.67	52.255
266.116	2661.16	51.912
266.164	2661.64	51.195
266.213	2662.13	51.729
266.262	2662.62	53.077
266.311	2663.11	53.239
266.36	2663.6	52.653
266.409	2664.09	51.942
266.457	2664.57	50.546
266.506	2665.06	49.151
266.555	2665.55	47.445
266.604	2666.04	45.928
266.653	2666.53	45.724
266.702	2667.02	46.585
266.751	2667.51	46.822
266.8	2668	45.31
266.848	2668.48	43.362
266.897	2668.97	43.291
266.946	2669.46	44.158
266.995	2669.95	45.089
267.044	2670.44	45.959
267.093	2670.93	45.143
267.141	2671.41	44.516
267.19	2671.9	45.64
267.239	2672.39	47.578
267.288	2672.88	48.705
267.337	2673.37	47.646
267.386	2673.86	45.838
267.435	2674.35	44.531
267.483	2674.83	41.664
267.532	2675.32	38.797
267.581	2675.81	36.745
267.63	2676.3	35.194
267.679	2676.79	33.707
267.728	2677.28	33.408
267.776	2677.76	32.986
267.825	2678.25	31.378
267.874	2678.74	29.209
267.923	2679.23	27.291
267.972	2679.72	24.874
268.021	2680.21	21.522
268.07	2680.7	20.045
268.118	2681.18	18.508
268.167	2681.67	16.159
268.216	2682.16	14.624
268.265	2682.65	15.091
268.314	2683.14	15.496
268.363	2683.63	15.278
268.412	2684.12	15.311
268.46	2684.6	16.845
268.509	2685.09	20.069
268.558	2685.58	21.606
268.607	2686.07	21.707
268.656	2686.56	21.872
268.705	2687.05	23.975
268.753	2687.53	26.143
268.802	2688.02	25.499
268.851	2688.51	24.482
268.9	2689	25.279
268.949	2689.49	27.264
268.998	2689.98	28.626
269.047	2690.47	29.552
269.096	2690.95	31.354
269.144	2691.44	33.282
269.193	2691.93	34.149
269.242	2692.42	34.642
269.291	2692.91	34.95
269.34	2693.4	34.821
269.389	2693.89	35.256
269.437	2694.37	36.38
269.486	2694.86	36.943
269.535	2695.35	37.007
269.584	2695.84	37.947
269.633	2696.33	39.577
269.682	2696.82	41.52
269.731	2697.31	41.589
269.779	2697.79	41.16
269.828	2698.28	39.732
269.877	2698.77	38.743
269.926	2699.26	36.693
269.975	2699.75	34.894
270.024	2700.24	31.784
270.072	2700.72	29.238
270.121	2701.21	27.568
270.17	2701.7	25.337
270.219	2702.19	23.233
270.268	2702.68	20.504
270.317	2703.17	17.777
270.366	2703.66	15.114
270.414	2704.14	12.952
270.463	2704.63	12.792
270.512	2705.12	14.57
270.561	2705.61	17.1
270.61	2706.1	19.444
270.659	2706.59	20.539
270.708	2707.08	21.572
270.756	2707.56	22.545
270.805	2708.05	22.394
270.854	2708.54	24.119
270.903	2709.03	24.783
270.952	2709.52	24.511
271.001	2710.01	23.741
271.05	2710.5	23.721
271.098	2710.98	24.453
271.147	2711.47	24.749
271.196	2711.96	24.796
271.245	2712.45	24.407
271.294	2712.94	24.644
271.343	2713.43	25.946
271.392	2713.91	27.748
271.44	2714.4	27.552
271.489	2714.89	26.857
271.538	2715.38	26.914
271.587	2715.87	27.659
271.636	2716.36	27.281
271.685	2716.85	26.466
271.733	2717.34	25.903
271.782	2717.82	25.341
271.831	2718.31	24.906
271.88	2718.8	23.346
271.929	2719.29	20.664
271.978	2719.78	18.607
272.027	2720.27	18.177
272.075	2720.75	17.248
272.124	2721.24	14.508
272.173	2721.73	11.332
272.222	2722.22	9.595
272.271	2722.71	8.546
272.32	2723.2	7.374
272.368	2723.68	6.266
272.417	2724.17	4.909
272.466	2724.66	4.116
272.515	2725.15	5.699
272.564	2725.64	8.909
272.613	2726.13	12.682
272.662	2726.62	16.144
272.711	2727.11	17.858
272.759	2727.59	20.198
272.808	2728.08	22.726
272.857	2728.57	25.194
272.906	2729.06	27.6
272.955	2729.55	28.758
273.004	2730.04	29.292
273.052	2730.52	29.64
273.101	2731.01	29.677
273.15	2731.5	28.652
273.199	2731.99	27.067
273.248	2732.48	27.295
273.297	2732.97	27.212
273.346	2733.45	27.318
273.394	2733.94	27.988
273.443	2734.43	29.221
273.492	2734.92	29.894
273.541	2735.41	29.38
273.59	2735.9	27.93
273.639	2736.39	26.794
273.688	2736.88	26.284
273.736	2737.36	26.338
273.785	2737.85	25.706
273.834	2738.34	24.451
273.883	2738.83	21.759
273.932	2739.32	20.881
273.981	2739.81	21.442
274.029	2740.3	23.004
274.078	2740.78	23.067
274.127	2741.27	21.319
274.176	2741.76	19.261
274.225	2742.25	17.891
274.274	2742.74	19.272
274.323	2743.23	20.78
274.371	2743.71	19.414
274.42	2744.2	16.549
274.469	2744.69	16.248
274.518	2745.18	16.886
274.567	2745.67	16.838
274.616	2746.16	16.729
274.664	2746.64	16.871
274.713	2747.13	18.139
274.762	2747.62	19.721
274.811	2748.11	20.93
274.86	2748.6	21.89
274.909	2749.09	22.351
274.958	2749.58	23.439
275.007	2750.07	26.84
275.055	2750.55	28.618
275.104	2751.04	29.709
275.153	2751.53	30.615
275.202	2752.02	31.647
275.251	2752.51	32.617
275.3	2753	32.464
275.348	2753.48	31.75
275.397	2753.97	30.6
275.446	2754.46	30.076
275.495	2754.95	29.803
275.544	2755.44	28.407
275.593	2755.93	28.762
275.642	2756.42	28.68
275.69	2756.9	28.663
275.739	2757.39	28.522
275.788	2757.88	28.133
275.837	2758.37	28.682
275.886	2758.86	28.482
275.935	2759.35	28.534
275.983	2759.84	27.088
276.032	2760.32	26.83
276.081	2760.81	28.636
276.13	2761.3	30.005
276.179	2761.79	29.689
276.228	2762.28	29.249
276.277	2762.77	29.998
276.325	2763.25	31.873
276.374	2763.74	32.812
276.423	2764.23	31.19
276.472	2764.72	31.132
276.521	2765.21	32.512
276.57	2765.7	33.519
276.619	2766.19	32.84
276.667	2766.67	30.162
276.716	2767.16	27.861
276.765	2767.65	25.811
276.814	2768.14	24.324
276.863	2768.63	24.527
276.912	2769.12	23.981
276.961	2769.61	23.436
277.009	2770.09	21.018
277.058	2770.58	19.35
277.107	2771.07	18.685
277.156	2771.56	20.833
277.205	2772.05	21.795
277.254	2772.54	20.946
277.303	2773.03	19.035
277.351	2773.51	19.876
277.4	2774	21.031
277.449	2774.49	21.125
277.498	2774.98	20.345
277.547	2775.47	20.629
277.596	2775.96	21.665
277.644	2776.44	23.576
277.693	2776.93	23.427
277.742	2777.42	24.154
277.791	2777.91	25.069
277.84	2778.4	25.987
277.889	2778.89	26.842
277.938	2779.38	28.075
277.986	2779.86	28.933
278.035	2780.35	28.981
278.084	2780.84	28.842
278.133	2781.33	29.08
278.182	2781.82	30.319
278.231	2782.31	32.56
278.279	2782.8	35.052
278.328	2783.28	37.42
278.377	2783.77	39.227
278.426	2784.26	40.785
278.475	2784.75	42.47
278.524	2785.24	43.031
278.573	2785.73	42.906
278.622	2786.22	44.47
278.67	2786.7	45.16
278.719	2787.19	45.977
278.768	2787.68	45.17
278.817	2788.17	43.739
278.866	2788.66	43.872
278.915	2789.15	44.632
278.963	2789.63	44.455
279.012	2790.12	43.655
279.061	2790.61	43.044
279.11	2791.1	44.496
279.159	2791.59	45.7
279.208	2792.08	46.843
279.257	2792.57	47.237
279.305	2793.05	45.82
279.354	2793.54	44.342
279.403	2794.03	42.74
279.452	2794.52	41.452
279.501	2795.01	40.353
279.55	2795.5	38.568
279.599	2795.99	36.472
279.647	2796.47	35.127
279.696	2796.96	33.283
279.745	2797.45	31.066
279.794	2797.94	29.225
279.843	2798.43	27.136
279.892	2798.92	24.548
279.94	2799.4	22.274
279.989	2799.89	21.063
280.038	2800.38	20.104
280.087	2800.87	18.897
280.136	2801.36	17.566
280.185	2801.85	16.548
280.234	2802.34	15.345
280.282	2802.82	13.018
280.331	2803.31	11.255
280.38	2803.8	11.118
280.429	2804.29	11.108
280.478	2804.78	10.036
280.527	2805.27	6.716
280.575	2805.75	4.085
280.624	2806.24	2.955
280.673	2806.73	2.889
280.722	2807.22	1.512
280.771	2807.71	-0.427
280.82	2808.2	0.074
280.869	2808.69	2.451
280.918	2809.18	4.142
280.966	2809.66	5.022
281.015	2810.15	4.528
281.064	2810.64	3.973
281.113	2811.13	5.607
281.162	2811.62	8.555
281.211	2812.11	10.317
281.259	2812.59	10.017
281.308	2813.08	9.282
281.357	2813.57	8.485
281.406	2814.06	7.565
281.455	2814.55	6.646
281.504	2815.04	5.416
281.553	2815.53	4.875
281.601	2816.01	5.023
281.65	2816.5	5.922
281.699	2816.99	6.198
281.748	2817.48	6.975
281.797	2817.97	8.941
281.846	2818.46	11.783
281.894	2818.94	15.064
281.943	2819.43	18.784
281.992	2819.92	21.318
282.041	2820.41	24.604
282.09	2820.9	27.453
282.139	2821.39	29.804
282.188	2821.88	31.718
282.236	2822.36	32.947
282.285	2822.85	36.489
282.334	2823.34	39.72
282.383	2823.83	43.265
282.432	2824.32	45.437
282.481	2824.81	45.797
282.53	2825.3	46.409
282.578	2825.78	47.21
282.627	2826.27	46.887
282.676	2826.76	45.441
282.725	2827.25	44.371
282.774	2827.74	43.302
282.823	2828.23	42.86
282.872	2828.72	42.357
282.92	2829.2	41.355
282.969	2829.69	39.729
283.018	2830.18	37.293
283.067	2830.67	35.17
283.116	2831.16	32.549
283.165	2831.65	29.616
283.214	2832.14	26.56
283.262	2832.62	24.068
283.311	2833.11	22.265
283.36	2833.6	20.276
283.409	2834.09	18.663
283.458	2834.58	17.489
283.507	2835.07	17.004
283.555	2835.55	15.896
283.604	2836.04	15.038
283.653	2836.53	13.995
283.702	2837.02	12.391
283.751	2837.51	11.288
283.8	2838	10.311
283.849	2838.49	9.774
283.897	2838.97	10.55
283.946	2839.46	9.015
283.995	2839.95	6.232
284.044	2840.44	4.075
284.093	2840.93	2.419
284.142	2841.42	1.953
284.19	2841.9	1.3
284.239	2842.39	0.711
284.288	2842.88	-0.314
284.337	2843.37	0.226
284.386	2843.86	2.016
284.435	2844.35	4.62
284.484	2844.84	6.476
284.533	2845.33	6.334
284.581	2845.81	7.442
284.63	2846.3	10.115
284.679	2846.79	12.414
284.728	2847.28	14.152
284.777	2847.77	15.329
284.826	2848.26	16.507
284.874	2848.74	18.499
284.923	2849.23	19.243
284.972	2849.72	18.863
285.021	2850.21	19.11
285.07	2850.7	20.67
285.119	2851.19	21.544
285.168	2851.68	20.92
285.216	2852.16	19.423
285.265	2852.65	18.176
285.314	2853.14	17.931
285.363	2853.63	18.25
285.412	2854.12	18.571
285.461	2854.61	18.205
285.51	2855.1	17.216
285.558	2855.58	15.541
285.607	2856.07	14.305
285.656	2856.56	13.507
285.705	2857.05	13.399
285.754	2857.54	13.292
285.803	2858.03	13.186
285.851	2858.51	11.582
285.9	2859	11.73
285.949	2859.49	11.253
285.998	2859.98	9.529
286.047	2860.47	7.805
286.096	2860.96	5.833
286.145	2861.45	3.863
286.193	2861.93	3.081
286.242	2862.42	2.301
286.291	2862.91	1.148
286.34	2863.4	0.621
286.389	2863.89	0.157
286.438	2864.38	0.258
286.486	2864.86	-0.015
286.535	2865.35	-0.474
286.584	2865.84	1.006
286.633	2866.33	2.113
286.682	2866.82	1.783
286.731	2867.31	0.018
286.78	2867.8	-2.434
286.829	2868.29	-3.072
286.877	2868.77	-2.958
286.926	2869.26	-4.843
286.975	2869.75	-8.726
287.024	2870.24	-10.733
287.073	2870.73	-11.176
287.122	2871.22	-10.742
287.17	2871.7	-11.307
287.219	2872.19	-12.621
287.268	2872.68	-12.995
287.317	2873.17	-12.744
287.366	2873.66	-12.678
287.415	2874.15	-11.611
287.464	2874.64	-9.229
287.512	2875.12	-6.222
287.561	2875.61	-3.4
287.61	2876.1	-2.889
287.659	2876.59	-2.377
287.708	2877.08	-1.801
287.757	2877.57	-0.786
287.805	2878.05	0.605
287.854	2878.54	1.248
287.903	2879.03	1.767
287.952	2879.52	3.663
288.001	2880.01	5.81
288.05	2880.5	7.209
288.099	2880.99	7.984
288.147	2881.47	9.324
288.196	2881.96	11.477
288.245	2882.45	13.006
288.294	2882.94	14.225
288.343	2883.43	14.695
288.392	2883.92	13.979
288.441	2884.41	13.389
288.489	2884.89	14.551
288.538	2885.38	15.215
288.587	2885.87	14.755
288.636	2886.36	13.984
288.685	2886.85	13.901
288.734	2887.34	13.758
288.783	2887.83	13.429
288.831	2888.31	12.851
288.88	2888.8	12.837
288.929	2889.29	12.825
288.978	2889.78	11.189
289.027	2890.27	8.993
289.076	2890.76	6.297
289.125	2891.24	4.291
289.173	2891.73	2.973
289.222	2892.22	1.032
289.271	2892.71	-1.907
289.32	2893.2	-5.345
289.369	2893.69	-8.782
289.418	2894.18	-12.717
289.466	2894.66	-16.088
289.515	2895.15	-19.77
289.564	2895.64	-22.888
289.613	2896.13	-24.004
289.662	2896.62	-25.682
289.711	2897.11	-28.545
289.76	2897.6	-32.095
289.808	2898.08	-32.768
289.857	2898.57	-31.565
289.906	2899.06	-30.985
289.955	2899.55	-32.091
290.004	2900.04	-32.758
290.053	2900.53	-33.112
290.101	2901.01	-33.088
290.15	2901.5	-30.689
290.199	2901.99	-29.412
290.248	2902.48	-28.635
290.297	2902.97	-27.793
290.346	2903.46	-27.075
290.395	2903.95	-26.043
290.443	2904.43	-23.509
290.492	2904.92	-21.036
290.541	2905.41	-17.937
290.59	2905.9	-15.461
290.639	2906.39	-12.984
290.688	2906.88	-9.38
290.737	2907.37	-4.65
290.785	2907.85	-1.794
290.834	2908.34	-1.06
290.883	2908.83	-1.013
290.932	2909.32	-0.902
290.981	2909.81	0.586
291.03	2910.3	1.637
291.079	2910.79	1.19
291.127	2911.27	0.557
291.176	2911.76	0.364
291.225	2912.25	-0.891
291.274	2912.74	-2.52
291.323	2913.23	-4.459
291.372	2913.72	-6.397
291.421	2914.2	-6.771
291.469	2914.69	-7.58
291.518	2915.18	-8.264
291.567	2915.67	-9.696
291.616	2916.16	-12.501
291.665	2916.65	-13.805
291.714	2917.14	-14.67
291.762	2917.62	-14.908
291.811	2918.11	-15.832
291.86	2918.6	-17.255
291.909	2919.09	-19.176
291.958	2919.58	-21.221
292.007	2920.07	-22.139
292.056	2920.56	-21.181
292.104	2921.04	-20.096
292.153	2921.53	-19.885
292.202	2922.02	-20.235
292.251	2922.51	-20.146
292.3	2923	-19.867
292.349	2923.49	-19.275
292.397	2923.97	-19.119
292.446	2924.46	-20.398
292.495	2924.95	-21.177
292.544	2925.44	-21.766
292.593	2925.93	-21.916
292.642	2926.42	-21.689
292.691	2926.91	-21.649
292.74	2927.4	-20.982
292.788	2927.88	-20.314
292.837	2928.37	-20.456
292.886	2928.86	-20.597
292.935	2929.35	-19.987
292.984	2929.84	-20.437
293.033	2930.33	-22.449
293.081	2930.81	-24.959
293.13	2931.3	-25.78
293.179	2931.79	-26.412
293.228	2932.28	-27.354
293.277	2932.77	-27.546
293.326	2933.26	-26.173
293.375	2933.75	-24.174
293.423	2934.23	-22.923
293.472	2934.72	-21.796
293.521	2935.21	-21.23
293.57	2935.7	-21.1
293.619	2936.19	-20.968
293.668	2936.68	-20.522
293.716	2937.16	-19.887
293.765	2937.65	-19.188
293.814	2938.14	-19.425
293.863	2938.63	-19.099
293.912	2939.12	-18.208
293.961	2939.61	-16.065
294.01	2940.1	-13.984
294.058	2940.59	-13.651
294.107	2941.07	-12.878
294.156	2941.56	-10.605
294.205	2942.05	-6.58
294.254	2942.54	-3.616
294.303	2943.03	-3.587
294.352	2943.52	-3.808
294.4	2944	-2.714
294.449	2944.49	-0.494
294.498	2944.98	-1.397
294.547	2945.47	-3.924
294.596	2945.96	-7.636
294.645	2946.45	-11.035
294.693	2946.93	-13.994
294.742	2947.42	-16.952
294.791	2947.91	-20.034
294.84	2948.4	-22.364
294.889	2948.89	-24.755
294.938	2949.38	-26.769
294.987	2949.87	-27.97
295.036	2950.36	-28.856
295.084	2950.84	-29.678
295.133	2951.33	-30.436
295.182	2951.82	-31.506
295.231	2952.31	-32.261
295.28	2952.8	-32.327
295.329	2953.29	-32.266
295.377	2953.78	-33.204
295.426	2954.26	-34.703
295.475	2954.75	-37.138
295.524	2955.24	-39.259
295.573	2955.73	-39.504
295.622	2956.22	-37.434
295.671	2956.71	-36.425
295.719	2957.19	-37.728
295.768	2957.68	-37.466
295.817	2958.17	-36.327
295.866	2958.66	-34.25
295.915	2959.15	-33.234
295.964	2959.64	-33.528
296.012	2960.12	-33.259
296.061	2960.61	-32.3
296.11	2961.1	-31.715
296.159	2961.59	-30.253
296.208	2962.08	-29.228
296.257	2962.57	-29.95
296.306	2963.06	-29.297
296.354	2963.54	-29.016
296.403	2964.03	-30.172
296.452	2964.52	-31.451
296.501	2965.01	-33.228
296.55	2965.5	-36.254
296.599	2965.99	-37.841
296.648	2966.48	-38.614
296.696	2966.96	-38.823
296.745	2967.45	-39.03
296.794	2967.94	-39.111
296.843	2968.43	-39.503
296.892	2968.92	-40.393
296.941	2969.41	-39.781
296.99	2969.9	-40.668
297.038	2970.38	-41.991
297.087	2970.87	-42.438
297.136	2971.36	-41.633
297.185	2971.85	-39.576
297.234	2972.34	-37.643
297.283	2972.83	-37.645
297.332	2973.32	-36.459
297.38	2973.8	-34.021
297.429	2974.29	-31.144
297.478	2974.78	-30.203
297.527	2975.27	-29.136
297.576	2975.76	-26.379
297.625	2976.25	-24.308
297.673	2976.73	-23.549
297.722	2977.22	-24.037
297.771	2977.71	-25.9
297.82	2978.2	-27.948
297.869	2978.69	-28.994
297.918	2979.18	-29.789
297.967	2979.67	-32.145
298.015	2980.15	-33.187
298.064	2980.64	-33.665
298.113	2981.13	-34.828
298.162	2981.62	-35.678
298.211	2982.11	-36.026
298.26	2982.6	-35.685
298.308	2983.09	-35.905
298.357	2983.57	-35.999
298.406	2984.06	-35.528
298.455	2984.55	-35.619
298.504	2985.04	-35.27
298.553	2985.53	-34.982
298.602	2986.02	-35.693
298.651	2986.51	-36.964
298.699	2986.99	-35.734
298.748	2987.48	-33.69
298.797	2987.97	-33.145
298.846	2988.46	-33.41
298.895	2988.95	-34.049
298.944	2989.44	-35.499
298.992	2989.92	-34.447
299.041	2990.41	-32.518
299.09	2990.9	-30.151
299.139	2991.39	-28.344
299.188	2991.88	-26.974
299.237	2992.37	-25.539
299.286	2992.86	-25.353
299.334	2993.34	-25.853
299.383	2993.83	-25.351
299.432	2994.32	-23.16
299.481	2994.81	-21.343
299.53	2995.3	-21.649
299.579	2995.79	-21.578
299.627	2996.28	-20.693
299.676	2996.76	-20.057
299.725	2997.25	-19.919
299.774	2997.74	-20.155
299.823	2998.23	-21.639
299.872	2998.72	-22.371
299.921	2999.21	-24.04
299.969	2999.69	-24.957
300.018	3000.18	-26.497
300.067	3000.67	-28.161
300.116	3001.16	-30.198
300.165	3001.65	-32.171
300.214	3002.14	-35.455
300.263	3002.63	-38.363
300.311	3003.11	-39.706
300.36	3003.6	-39.735
300.409	3004.09	-39.326
300.458	3004.58	-38.727
300.507	3005.07	-38.439
300.556	3005.56	-38.775
300.604	3006.04	-38.921
300.653	3006.53	-38.191
300.702	3007.02	-39.397
300.751	3007.51	-40.851
300.8	3008	-40.491
300.849	3008.49	-39.818
300.898	3008.98	-39.892
300.947	3009.47	-39.778
300.995	3009.95	-39.849
301.044	3010.44	-41.107
301.093	3010.93	-41.987
301.142	3011.42	-42.304
301.191	3011.91	-41.994
301.24	3012.4	-40.746
301.288	3012.89	-39.37
301.337	3013.37	-38.431
301.386	3013.86	-37.427
301.435	3014.35	-36.859
301.484	3014.84	-34.603
301.533	3015.33	-34.657
301.582	3015.82	-36.272
301.63	3016.3	-37.01
301.679	3016.79	-37.122
301.728	3017.28	-36.733
301.777	3017.77	-36.404
301.826	3018.26	-35.887
301.875	3018.75	-35.055
301.923	3019.23	-33.534
301.972	3019.72	-32.511
302.021	3020.21	-31.987
302.07	3020.7	-31.274
302.119	3021.19	-30.247
302.168	3021.68	-29.344
302.217	3022.17	-28.688
302.265	3022.65	-28.906
302.314	3023.14	-28.998
302.363	3023.63	-29.276
302.412	3024.12	-29.176
302.461	3024.61	-30.701
302.51	3025.1	-33.224
302.559	3025.59	-34.432
302.607	3026.07	-34.077
302.656	3026.56	-34.72
302.705	3027.05	-35.174
302.754	3027.54	-36.377
302.803	3028.03	-36.14
302.852	3028.52	-35.152
302.901	3029.01	-33.725
302.949	3029.49	-31.671
302.998	3029.98	-29.803
303.047	3030.47	-29.871
303.096	3030.96	-30.812
303.145	3031.45	-31.877
303.194	3031.94	-32.628
303.243	3032.43	-32.877
303.291	3032.91	-33.813
303.34	3033.4	-34.496
303.389	3033.89	-35.053
303.438	3034.38	-35.609
303.487	3034.87	-35.975
303.536	3035.36	-36.903
303.584	3035.84	-37.266
303.633	3036.33	-36.128
303.682	3036.82	-35.488
303.731	3037.31	-34.784
303.78	3037.8	-34.266
303.829	3038.29	-32.621
303.878	3038.78	-30.288
303.926	3039.26	-27.827
303.975	3039.75	-25.241
304.024	3040.24	-21.027
304.073	3040.73	-16.125
304.122	3041.22	-11.096
304.171	3041.71	-8.19
304.219	3042.19	-5.596
304.268	3042.68	-2.375
304.317	3043.17	0.098
304.366	3043.66	0.322
304.415	3044.15	-1.202
304.464	3044.64	-3.537
304.513	3045.13	-5.995
304.562	3045.62	-8.452
304.61	3046.1	-11.595
304.659	3046.59	-14.299
304.708	3047.08	-18.939
304.757	3047.57	-23.514
304.806	3048.06	-27.338
304.855	3048.55	-29.911
304.903	3049.03	-32.794
304.952	3049.52	-35.864
305.001	3050.01	-38.369
305.05	3050.5	-39.935
305.099	3050.99	-41.813
305.148	3051.48	-44.001
305.197	3051.97	-45.625
305.245	3052.45	-48.06
305.294	3052.94	-50.431
305.343	3053.43	-52.925
305.392	3053.92	-55.168
305.441	3054.41	-55.722
305.49	3054.9	-55.836
305.538	3055.39	-57.012
305.587	3055.87	-58.686
305.636	3056.36	-59.734
305.685	3056.85	-58.28
305.734	3057.34	-57.449
305.783	3057.83	-57.742
305.832	3058.32	-57.221
305.88	3058.8	-54.948
305.929	3059.29	-52.298
305.978	3059.78	-48.898
306.027	3060.27	-44.933
306.076	3060.76	-42.091
306.125	3061.25	-39.81
306.174	3061.74	-37.966
306.222	3062.22	-35.495
306.271	3062.71	-34.397
306.32	3063.2	-34.985
306.369	3063.69	-34.384
306.418	3064.18	-32.907
306.467	3064.67	-30.928
306.515	3065.15	-29.26
306.564	3065.64	-29.84
306.613	3066.13	-30.106
306.662	3066.62	-29.496
306.711	3067.11	-28.572
306.76	3067.6	-27.271
306.809	3068.09	-25.719
306.858	3068.58	-24.727
306.906	3069.06	-24.734
306.955	3069.55	-24.74
307.004	3070.04	-24.556
307.053	3070.53	-24.871
307.102	3071.02	-24.872
307.151	3071.51	-25.871
307.2	3071.99	-26.869
307.248	3072.48	-27.677
307.297	3072.97	-27.234
307.346	3073.46	-26.602
307.395	3073.95	-27.531
307.444	3074.44	-30.334
307.493	3074.93	-31.385
307.541	3075.41	-30.747
307.59	3075.9	-29.794
307.639	3076.39	-30.216
307.688	3076.88	-30.323
307.737	3077.37	-30.116
307.786	3077.86	-29.345
307.834	3078.34	-27.323
307.883	3078.83	-25.924
307.932	3079.32	-24.461
307.981	3079.81	-23.558
308.03	3080.3	-21.217
308.079	3080.79	-19.125
308.128	3081.28	-18.343
308.176	3081.76	-17.81
308.225	3082.25	-15.587
308.274	3082.74	-12.426
308.323	3083.23	-10.826
308.372	3083.72	-10.036
308.421	3084.21	-9.37
308.47	3084.7	-9.14
308.518	3085.18	-9.596
308.567	3085.67	-9.425
308.616	3086.16	-10.441
308.665	3086.65	-11.955
308.714	3087.14	-14.467
308.763	3087.63	-17.665
308.812	3088.12	-20.487
308.86	3088.6	-23.057
308.909	3089.09	-24.876
308.958	3089.58	-27.13
309.007	3090.07	-29.633
309.056	3090.56	-32.01
309.105	3091.05	-34.385
309.154	3091.53	-36.758
309.202	3092.02	-38.63
309.251	3092.51	-39.563
309.3	3093	-40.182
309.349	3093.49	-40.674
309.398	3093.98	-41.415
309.447	3094.47	-41.404
309.495	3094.95	-42.017
309.544	3095.44	-42.378
309.593	3095.93	-43.613
309.642	3096.42	-45.784
309.691	3096.91	-47.703
309.74	3097.4	-46.683
309.789	3097.89	-44.599
309.837	3098.37	-42.639
309.886	3098.86	-41.177
309.935	3099.35	-40.651
309.984	3099.84	-39.561
310.033	3100.33	-36.719
310.082	3100.82	-35.001
310.13	3101.3	-34.906
310.179	3101.79	-35.873
310.228	3102.28	-35.775
310.277	3102.77	-36.364
310.326	3103.26	-38.45
310.375	3103.75	-37.911
310.424	3104.24	-35.807
310.473	3104.73	-34.139
310.521	3105.21	-33.657
310.57	3105.7	-33.549
310.619	3106.19	-32.689
310.668	3106.68	-31.828
310.717	3107.17	-30.715
310.766	3107.66	-30.476
310.814	3108.14	-30.298
310.863	3108.63	-29.93
310.912	3109.12	-29.062
310.961	3109.61	-27.879
311.01	3110.1	-27.257
311.059	3110.59	-26.508
311.108	3111.08	-24.196
311.156	3111.56	-23.132
311.205	3112.05	-22.942
311.254	3112.54	-23.812
311.303	3113.03	-23.181
311.352	3113.52	-21.049
311.401	3114.01	-21.29
311.45	3114.49	-22.217
311.498	3114.98	-22.393
311.547	3115.47	-23.379
311.596	3115.96	-24.364
311.645	3116.45	-24.66
311.694	3116.94	-24.392
311.743	3117.43	-23.936
311.791	3117.91	-24.165
311.84	3118.4	-25.205
311.889	3118.89	-25.118
311.938	3119.38	-25.78
311.987	3119.87	-25.691
312.036	3120.36	-25.538
312.085	3120.85	-25.633
312.133	3121.33	-26.976
312.182	3121.82	-28.443
312.231	3122.31	-28.284
312.28	3122.8	-26.498
312.329	3123.29	-25.086
312.378	3123.78	-25.109
312.426	3124.26	-26.882
312.475	3124.75	-27.527
312.524	3125.24	-26.109
312.573	3125.73	-26.252
312.622	3126.22	-29.581
312.671	3126.71	-33.033
312.72	3127.2	-34.296
312.769	3127.69	-32.808
312.817	3128.17	-31.568
312.866	3128.66	-31.077
312.915	3129.15	-31.084
312.964	3129.64	-31.34
313.013	3130.13	-31.845
313.062	3130.62	-31.785
313.111	3131.11	-31.912
313.159	3131.59	-31.474
313.208	3132.08	-30.91
313.257	3132.57	-32.282
313.306	3133.06	-33.715
313.355	3133.55	-33.397
313.404	3134.04	-33.077
313.452	3134.52	-32.256
313.501	3135.01	-31.683
313.55	3135.5	-33.733
313.599	3135.99	-35.72
313.648	3136.48	-37.393
313.697	3136.97	-40.002
313.745	3137.45	-42.422
313.794	3137.94	-44.09
313.843	3138.43	-45.695
313.892	3138.92	-47.485
313.941	3139.41	-48.399
313.99	3139.9	-47.562
314.039	3140.39	-46.223
314.087	3140.88	-44.32
314.136	3141.36	-42.978
314.185	3141.85	-43.447
314.234	3142.34	-44.103
314.283	3142.83	-43.757
314.332	3143.32	-41.722
314.381	3143.81	-39.185
314.429	3144.29	-38.96
314.478	3144.78	-40.858
314.527	3145.27	-44.379
314.576	3145.76	-47.399
314.625	3146.25	-48.231
314.674	3146.74	-48.123
314.723	3147.23	-48.514
314.771	3147.71	-49.278
314.82	3148.2	-50.416
314.869	3148.69	-50.553
314.918	3149.18	-49.875
314.967	3149.67	-48.634
315.016	3150.16	-47.641
315.065	3150.64	-47.272
315.113	3151.13	-47.589
315.162	3151.62	-46.967
315.211	3152.11	-44.718
315.26	3152.6	-42.406
315.309	3153.09	-40.842
315.358	3153.58	-39.214
315.406	3154.07	-37.335
315.455	3154.55	-36.329
315.504	3155.04	-35.197
315.553	3155.53	-34.751
315.602	3156.02	-33.929
315.651	3156.51	-33.917
315.7	3157	-34.217
315.748	3157.48	-35.266
315.797	3157.97	-35.937
315.846	3158.46	-35.483
315.895	3158.95	-35.465
315.944	3159.44	-35.882
315.993	3159.93	-35.736
316.041	3160.41	-36.088
316.09	3160.9	-36.064
316.139	3161.39	-36.851
316.188	3161.88	-37.825
316.237	3162.37	-37.609
316.286	3162.86	-38.142
316.335	3163.35	-39.673
316.384	3163.84	-40.078
316.432	3164.32	-39.919
316.481	3164.81	-39.946
316.53	3165.3	-40.847
316.579	3165.79	-41.559
316.628	3166.28	-41.582
316.677	3166.77	-40.416
316.725	3167.25	-41.812
316.774	3167.74	-42.893
316.823	3168.23	-43.91
316.872	3168.72	-44.614
316.921	3169.21	-44.441
316.97	3169.7	-45.33
317.019	3170.19	-45.716
317.067	3170.67	-46.727
317.116	3171.16	-48.049
317.165	3171.65	-47.994
317.214	3172.14	-48.875
317.263	3172.63	-50.193
317.312	3173.12	-50.259
317.361	3173.61	-50.824
317.409	3174.09	-50.45
317.458	3174.58	-51.324
317.507	3175.07	-51.885
317.556	3175.56	-52.069
317.605	3176.05	-53.252
317.654	3176.54	-53.934
[truncated: 2,095 more rows]
